# Supplementary material for: Phosphate starvation signaling increases mitochondrial membrane potential through respiration-independent mechanisms
Source: eLife journal article supplement (doi:10.7554/elife.84282), 2024-01-22

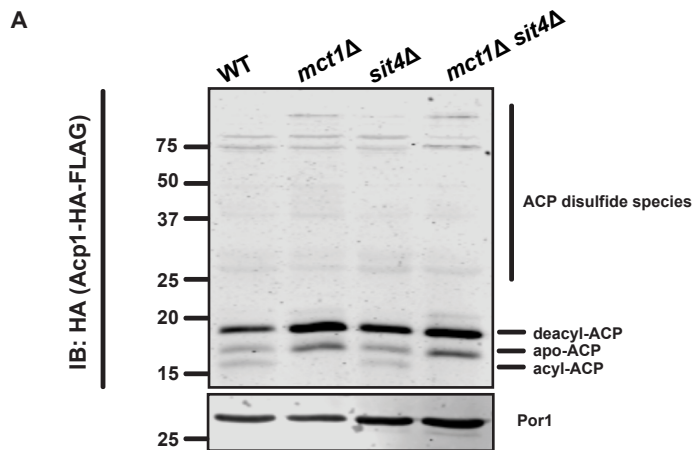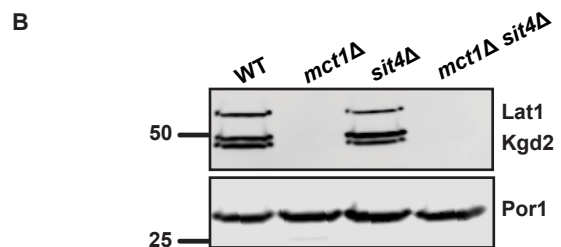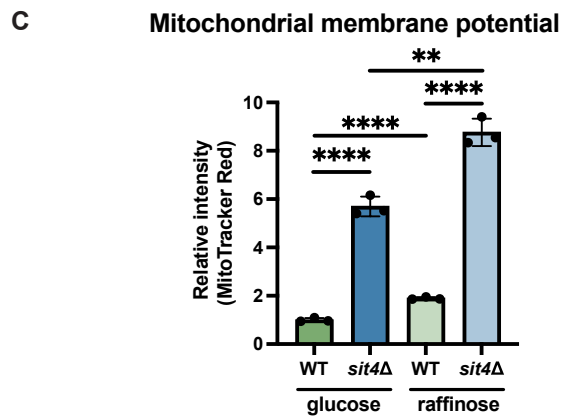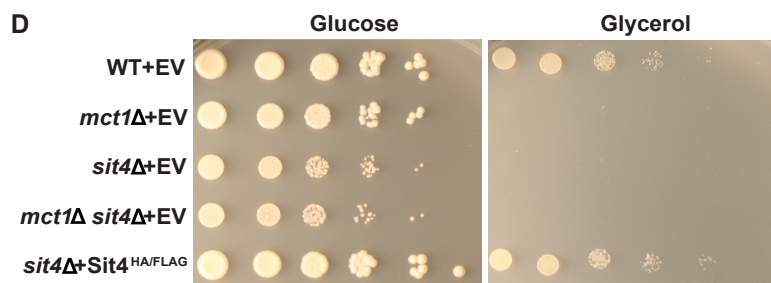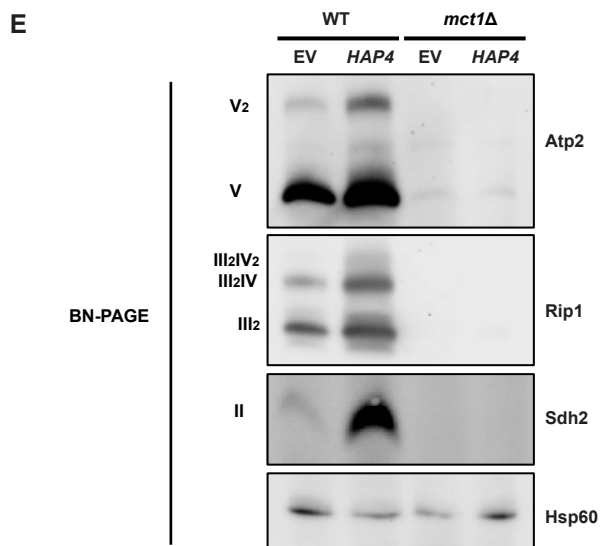

**F Mitochondrial membrane potential**

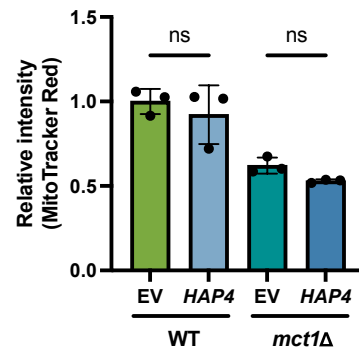

**G Mitochondrial membrane potential**

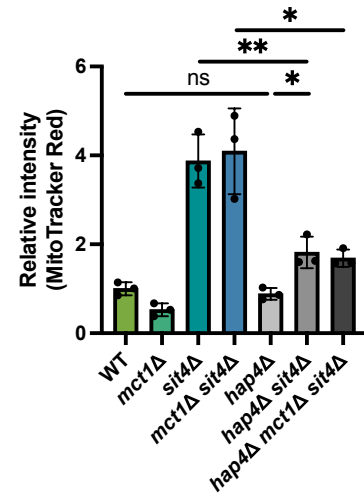

**H Mitochondrial membrane potential**

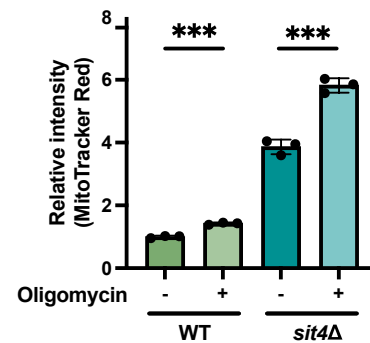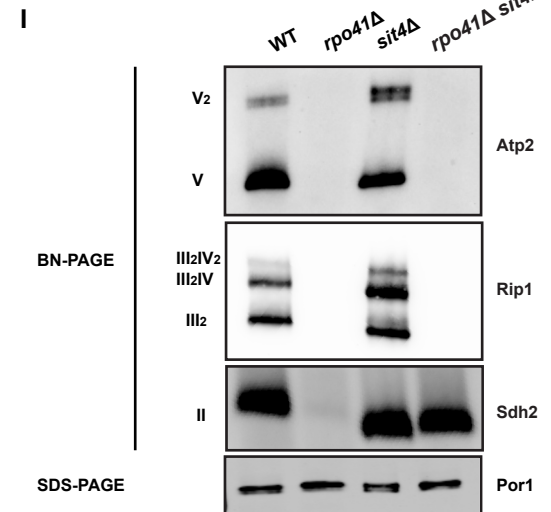

Supplement: supp [file elife_poa_e84282_Figure_2_figure_supplement_1.pdf › elife_poa_e84282_Figure_2_figure_supplement_1.pdf]
