# Supplementary material for: Phosphate starvation signaling increases mitochondrial membrane potential through respiration-independent mechanisms
Source: eLife. 2024 Jan 22;13:e84282. doi: 10.7554/eLife.84282 (PMC10846858; doi:10.7554/eLife.84282)
Supplement: Supplementary file 1. [file elife-84282-supp1.xlsx]

## Sheet: Sheet1
primer name		sequence
KO_SIT4_fwd		GTGAAATACTATTGAAGCTCAAAAACATCCATAATAAAAGGAACAATAACAgacatggaggcccagaataccc
KO_SIT4_fwd		CTTTTTTTTATTGTGAAAATTATTTTTATTCGTCGAGTTAGGGAGGGCATGCCGTCGTGcagtatagcgaccagcattcacatac
KO_QCR2_fwd		GATTAGGACGGGAGAGTTAAAATTATTAAAAGGAAAAAAGAAGAACGTTGgacatggaggcccagaataccc
KO_QCR2_fwd		CATCTATATATATATTTGCCTTTAGTTTTTCGTTTTGTACAAATACTTTCCTCcagtatagcgaccagcattcacatac
KO_COX4_fwd		CAATACTCACCCATTTCGATTTTGATGTTGCCATACAAATAGATAACAAGCACAgacatggaggcccagaataccc
KO_COX4_rev		CATGACGTGTGTAAAAGCTCAGACCTGGTAAGAATATTCGCTAGGTTTCCcagtatagcgaccagcattcacatac
KO_RPO41_fwd		CATTTTATACATTCCTTGGATCAGTTCCTCCCCCTCTTTGATATTCACTCAATgacatggaggcccagaataccc
KO_RPO41_rev		GTACAAGTTAAATAAAAATAACACAAATAAATTTTAGTTTGTAGTTCACGGCcagtatagcgaccagcattcacatac
KO_PHO85_fwd		CAGATAAGGGATATATAGCGCGGCAAACTGGGCAAACTTGAGCAATACCAgacatggaggcccagaataccc
KO_PHO85_rev		GATTATTATCATTATATATACATGGCTACGGTTTTTCGCTGACGGGCTGCGcagtatagcgaccagcattcacatac
Tom70 pKT tagging F5		TCAAGAAACTTTAGCTAAATTACGCGAACAGGGTTTAATGGGTGACGGTGCTGGTTTA
Tom70 pKT tagging R3		TTTGTCTTCTCCTAAAAGTTTTTAAGTTTATGTTTACTGTTCGATGAATTCGAGCTCG
