# Supplementary material for: Phosphate starvation signaling increases mitochondrial membrane potential through respiration-independent mechanisms
Source: eLife. 2024 Jan 22;13:e84282. doi: 10.7554/eLife.84282 (PMC10846858; doi:10.7554/eLife.84282)
Supplement: Supplementary file 3. [file elife-84282-supp3.xlsx]

## Sheet: Sheet1
site_id	Protein Id	gene_symbol	prot_description	Site Position	Motif	Max Score	low_bound	high_bound	best_search_id	best_peptide_id	best_scan	best_search_name	file	redundancy	sequence	numMatchingCompSites	numQuantCompSites	default~spectral_counts	default~num_quant	WT	WT	WT	WT	sit4	sit4	sit4	sit4	Mean (WT)	Mean (sit4)	CV (WT)	CV (sit4)	sit4/WT fold change	sit4/WT p-value
1858	YML123C	PHO84	High-affinity inorganic phosphate (Pi) transporter and low-affinity manganese transporter; regulated by Pho4p and Spt7p; mutation confers resistance to arsenate; exit from the ER during maturation requires Pho86p	321	ASTAVESLDNHPP	1000	0	0	510246	11982	15865	eb04472_JV297_phos	eb04472.raw	U	R.AS#T#AVES#LDNHPPK.A	2	2	4	1	33.6871	24.9114	38.8813	45.7319	269.015	244.965	249.985	236.432	35.8029	250.099	0.245178	0.0551604	6.98544	2.03458e-07
1130	YPL019C	VTC3	Subunit of the vacuolar transporter chaperone (VTC) complex involved in membrane trafficking, vacuolar polyphosphate accumulation, microautophagy and non-autophagic vacuolar fusion	592	RRLSKISVPDGKT	1000	0	0	510246	12206	16146	eb04472_JV297_phos	eb04472.raw	U	K.IS#VPDGK.T	0	0	4	4	365.921	350.064	304.732	317.3	1568.15	1606.91	1340.3	1593.56	334.504	1527.23	0.0847575	0.0822748	4.56566	1.59893e-06
3237	YFR021W	ATG18	Phosphoinositide binding protein required for vesicle formation in autophagy and the cytoplasm-to-vacuole targeting (Cvt) pathway; binds both phosphatidylinositol (3,5)-bisphosphate and phosphatidylinositol 3-phosphate; WD-40 repeat protein	195	AGHSDISDLDQYS	4.9882	-3	9	510246	19667	25483	eb04472_JV297_phos	eb04472.raw	U	R.DQQDAGHSDIS#DLDQYSSFTK.R	0	0	1	1	2.5812	3.69252	6.83937	3.54197	17.4068	20.5928	16.4026	19.4891	4.16376	18.4728	0.444408	0.103418	4.43656	3.8087e-05
3582	YML073C	RPL6A	N-terminally acetylated protein component of the large (60S) ribosomal subunit, has similarity to Rpl6Bp and to rat L6 ribosomal protein; binds to 5.8S rRNA	10	QKAPKWYPSEDVA	11.0148	0	2	510246	24981	31884	eb04472_JV297_phos	eb04472.raw	U	K.WY#PSEDVAALK.K	0	0	2	2	28.8832	24.7851	23.4746	27.5385	102.151	134.085	102.448	117.225	26.1703	113.977	0.0946767	0.132831	4.35521	2.66705e-05
3219	YDR033W	MRH1	Protein that localizes primarily to the plasma membrane, also found at the nuclear envelope; the authentic, non-tagged protein is detected in mitochondria in a phosphorylated state; has similarity to Hsp30p and Yro2p	289	PKAPVASPRPAAT	1000	0	0	510247	1253	2468	eb04473_JV297_phos	eb04473.raw	U	K.APVAS#PR.P	1	1	5	2	58.1487	62.836	47.2614	62.6707	201.886	256.674	259.065	282.737	57.7292	250.09	0.126602	0.136837	4.33213	3.36561e-05
3383	YCR021C	HSP30	Hydrophobic plasma membrane localized, stress-responsive protein that negatively regulates the H(+)-ATPase Pma1p; induced by heat shock, ethanol treatment, weak organic acid, glucose limitation, and entry into stationary phase	308	KEAVPESPRASGE	1000	0	0	510246	1422	2551	eb04472_JV297_phos	eb04472.raw	U	K.EAVPES#PR.A	0	0	2	2	40.5583	50.2856	39.4331	45.0784	207.429	187.311	171.349	165.222	43.8389	182.828	0.112731	0.103154	4.17045	7.44315e-06
1610	YKR095W	MLP1	Myosin-like protein associated with the nuclear envelope, connects the nuclear pore complex with the nuclear interior; involved with Tel1p in telomere length control; involved with Pml1p and Pml39p in nuclear retention of unspliced mRNAs	337	DDSKKQTPENEDL	1000	0	0	510246	11571	15363	eb04472_JV297_phos	eb04472.raw	U	K.KQT#PENEDLLK.E	0	0	1	1	17.1243	18.2312	17.1453	12.9916	63.7706	65.3585	63.6065	66.8456	16.3731	64.8953	0.141259	0.0234444	3.96353	3.59161e-08
3039	YGL009C	LEU1	Isopropylmalate isomerase, catalyzes the second step in the leucine biosynthesis pathway	748	LRREKYSFLEGGS	6.59058	-1	6	510246	16780	21841	eb04472_JV297_phos	eb04472.raw	U	R.EKYS#FLEGGSK.L	0	0	1	1	41.837	34.6529	51.8939	50.6593	245.937	146.55	180.54	126.087	44.7608	174.778	0.180761	0.300304	3.90472	0.00272055
1904	YHR195W	NVJ1	Nuclear envelope protein, anchored to the nuclear inner membrane, that interacts with the vacuolar membrane protein Vac8p to promote formation of nucleus-vacuole junctions during piecemeal microautophagy of the nucleus (PMN)	276	STSFPISFKGSID	36.5564	0	0	510247	20891	27653	eb04473_JV297_phos	eb04473.raw	U	K.SSTSFPIS#FK.G	0	0	2	2	69.1308	76.2595	72.058	94.0648	382.612	252.921	309.745	234.074	77.8783	294.838	0.143565	0.226471	3.78588	0.000680406
3018	YPL186C	UIP4	Protein that interacts with Ulp1p, a Ubl (ubiquitin-like protein)-specific protease for Smt3p protein conjugates; detected in a phosphorylated state in the mitochondrial outer membrane; also detected in ER and nuclear envelope	185	EENKELSPNFSQE	18.8054	0	0	510246	12182	16116	eb04472_JV297_phos	eb04472.raw	U	K.ELS#PNFSQEQTENK.Q	0	0	1	1	4.52905	9.02616	6.08985	6.82254	21.3343	27.4747	22.8598	27.6015	6.6169	24.8176	0.282516	0.12906	3.75063	6.44032e-05
2069	YJR059W	PTK2	Putative serine/threonine protein kinase involved in regulation of ion transport across plasma membrane; enhances spermine uptake	15	EVDKSPSVSTLKL	11.0148	-2	3	510247	9098	12694	eb04473_JV297_phos	eb04473.raw	U	K.SPS#VSTLK.L	0	0	2	2	104.634	76.512	80.8545	92.6271	320.294	358.113	280.935	348.107	88.6569	326.862	0.142588	0.105692	3.68682	1.30462e-05
656	YER063W	THO1	Conserved nuclear RNA-binding protein; specifically binds to transcribed chromatin in a THO- and RNA-dependent manner, genetically interacts with shuttling hnRNP NAB2; overproduction suppresses transcriptional defect caused by hpr1 mutation	78	TEKKEVSSEPKET	9.34047	0	1	510246	2400	3793	eb04472_JV297_phos	eb04472.raw	U	K.EVS#SEPK.E	0	0	3	3	123.479	106.936	112.553	111.474	407.699	427.834	403.472	404.87	113.611	410.969	0.0617456	0.0276907	3.61735	8.63918e-09
701	YML007W	YAP1	Basic leucine zipper (bZIP) transcription factor required for oxidative stress tolerance; activated by H2O2 through the multistep formation of disulfide bonds and transit from the cytoplasm to the nucleus; mediates resistance to cadmium	590	DNDVVPSKEGSLL	1000	0	0	510246	8446	11435	eb04472_JV297_phos	eb04472.raw	U	K.INNGNDNDNDNDVVPS#K.E	0	0	2	1	6.1662	7.55336	6.99552	7.77665	31.4553	20.6989	20.2002	27.674	7.12293	25.0071	0.100723	0.219464	3.51079	0.000651096
3359	YBR054W	YRO2	Protein of unknown function with similarity to archaeal rhodopsins; the authentic, non-tagged protein is detected in a phosphorylated state in highly purified mitochondria in high-throughput studies; transcriptionally regulated by Haa1p	290	AEKKMPSPASFKS	1000	0	0	510246	19265	24962	eb04472_JV297_phos	eb04472.raw	U	K.KMPS#PAS#FK.S	1	1	3	2	38.2041	38.6926	46.439	49.4961	166.271	152.609	139.694	143.424	43.208	150.5	0.130517	0.0786189	3.48314	3.30797e-06
1906	YHR195W	NVJ1	Nuclear envelope protein, anchored to the nuclear inner membrane, that interacts with the vacuolar membrane protein Vac8p to promote formation of nucleus-vacuole junctions during piecemeal microautophagy of the nucleus (PMN)	291	SLNQPSSLLHIQV	0	-6	9	510246	22078	28365	eb04472_JV297_phos	eb04472.raw	U	K.SLNQPSS#LLHIQVSPTK.S	0	0	1	1	50.8831	43.8263	39.787	20.4546	34.035	217.597	81.0111	203.874	38.7377	134.129	0.336178	0.676105	3.46249	0.0824576
3031	YNR051C	BRE5	Ubiquitin protease cofactor, forms deubiquitination complex with Ubp3p that coregulates anterograde and retrograde transport between the endoplasmic reticulum and Golgi compartments; null is sensitive to brefeldin A	187	EKEKEKSPEISKP	47.0452	0	0	510247	7222	10310	eb04473_JV297_phos	eb04473.raw	U	K.EKS#PEISKPK.A	0	0	1	1	46.8918	56.7238	48.5522	43.131	115.909	168.879	173.44	215.359	48.8247	168.397	0.117434	0.242094	3.44901	0.00114235
2365	YHR136C	SPL2	Protein with similarity to cyclin-dependent kinase inhibitors; downregulates low-affinity phosphate transport during phosphate limitation; overproduction suppresses a plc1 null mutation; GFP-fusion protein localizes to the cytoplasm	59	HKGRKLSEEIASL	22.4917	0	0	510246	23446	29981	eb04472_JV297_phos	eb04472.raw	U	R.KLS#EEIASLLR.L	0	0	1	1	31.9424	36.5465	28.6795	42.1638	128.622	106.902	110.39	133.885	34.8331	119.95	0.168132	0.110916	3.44356	2.33845e-05
3458	YNL287W	SEC21	Gamma subunit of coatomer, a heptameric protein complex that together with Arf1p forms the COPI coat; involved in ER to Golgi transport of selective cargo	638	ETTLDTTPEAESV	1.48807	-7	5	510246	12168	16099	eb04472_JV297_phos	eb04472.raw	U	K.SETTLDTT#PEAESVPEK.R	0	0	1	1	14.6029	11.572	14.6885	21.4348	52.6618	49.5526	49.3068	57.3066	15.5746	52.207	0.267553	0.0713872	3.35207	1.21753e-05
1568	YNL166C	BNI5	Protein involved in organization of septins at the mother-bud neck, may interact directly with the Cdc11p septin, localizes to bud neck in a septin-dependent manner	190	GRVDKGTEENSEI	14.4608	0	0	510246	17592	22860	eb04472_JV297_phos	eb04472.raw	U	R.VDKGT#EENS#EIESFK.S	1	1	3	1	14.7583	12.5398	10.233	10.2992	41.4834	44.1956	34.4752	38.0835	11.9576	39.5594	0.18006	0.106473	3.30832	2.38625e-05
1635	YNR019W	ARE2	Acyl-CoA:sterol acyltransferase, isozyme of Are1p; endoplasmic reticulum enzyme that contributes the major sterol esterification activity in the presence of oxygen	176	LHHRKSSPDAVDS	26.1051	0	0	510247	7698	10903	eb04473_JV297_phos	eb04473.raw	U	R.KS#S#PDAVDSVGK.N	1	1	5	4	104.957	110.618	113.261	97.659	366.96	359.664	326.098	341.603	106.624	348.581	0.0647855	0.0527623	3.26927	2.94552e-07
1922	YMR196W	YMR196W	Putative protein of unknown function; green fluorescent protein (GFP)-fusion protein localizes to the cytoplasm; YMR196W is not an essential gene	1081	DPMDPMSPLNKDV	1000	0	0	510246	19512	25286	eb04472_JV297_phos	eb04472.raw	U	K.AKDEDIDPM*DPMS#PLNK.D	0	0	1	1	5.48505	4.471	5.56935	6.74412	22.659	15.5009	16.0068	17.9416	5.56738	18.0271	0.167007	0.180959	3.23798	0.000325488
3301	YNL088W	TOP2	Topoisomerase II, relieves torsional strain in DNA by cleaving and re-sealing the phosphodiester backbone of both positively and negatively supercoiled DNA; cleaves complementary strands; localizes to axial cores in meiosis	1250	KIKKEKTPSVSET	11.0148	0	6	510246	4564	6530	eb04472_JV297_phos	eb04472.raw	U	K.EKT#PSVSETK.T	0	0	1	1	68.0791	76.8802	61.4815	62.1217	209.23	225.685	191.871	224.608	67.1406	212.849	0.10635	0.0745919	3.17019	2.90161e-06
1856	YML123C	PHO84	High-affinity inorganic phosphate (Pi) transporter and low-affinity manganese transporter; regulated by Pho4p and Spt7p; mutation confers resistance to arsenate; exit from the ER during maturation requires Pho86p	316	NGLERASTAVESL	1000	0	0	510246	11982	15865	eb04472_JV297_phos	eb04472.raw	U	R.AS#T#AVES#LDNHPPK.A	2	2	4	1	24.9636	31.7178	28.8461	22.1406	70.2313	94.7162	74.789	95.5594	26.917	83.824	0.15674	0.157478	3.11416	0.000175841
1740	YPR160W	GPH1	Non-essential glycogen phosphorylase required for the mobilization of glycogen, activity is regulated by cyclic AMP-mediated phosphorylation, expression is regulated by stress-response elements and by the HOG MAP kinase pathway	31	RLTRRLTGFLPQE	1000	0	0	510246	22062	28347	eb04472_JV297_phos	eb04472.raw	U	R.RLT#GFLPQEIK.S	0	0	4	3	150.725	155.328	185.725	187.711	458.665	554.162	458.197	641.314	169.872	528.084	0.11514	0.166541	3.10871	0.000210405
3361	YBR054W	YRO2	Protein of unknown function with similarity to archaeal rhodopsins; the authentic, non-tagged protein is detected in a phosphorylated state in highly purified mitochondria in high-throughput studies; transcriptionally regulated by Haa1p	301	KSSDSDSSIKEKL	9.34047	-5	1	510246	2410	3805	eb04472_JV297_phos	eb04472.raw	U	K.SSDSDS#SIK.E	0	0	1	1	36.0532	33.1801	36.1643	39.4583	121.499	101.293	108.139	107.674	36.214	109.651	0.0708667	0.0774597	3.02786	3.09951e-06
2456	YDR293C	SSD1	Translational repressor with a role in cell wall polar growth and integrity; regulated by Cbk1p phosphorylation to effect bud-specific translational control of specific mRNAs; interacts with TOR pathway components	1175	PLSKELSDLHLTV	39.6629	0	0	510247	21207	28023	eb04473_JV297_phos	eb04473.raw	U	K.ELS#DLHLTVPNLR.L	0	0	1	1	30.2335	30.9498	18.8525	18.2719	88.7071	79.4672	69.5936	57.222	24.5769	73.7475	0.283006	0.183074	3.00068	0.000644298
2481	YPL160W	CDC60	Cytosolic leucyl tRNA synthetase, ligates leucine to the appropriate tRNA	142	EEIKEETPAEKDH	1000	0	0	510246	17729	23030	eb04472_JV297_phos	eb04472.raw	U	K.NFDNVPAEEEEIKEET#PAEK.D	0	0	6	5	161.827	144.355	146.177	183.346	441.165	446.212	469.244	492.668	158.926	462.322	0.113701	0.0511233	2.90903	9.03246e-07
2826	YIL126W	STH1	ATPase component of the RSC chromatin remodeling complex; required for expression of early meiotic genes; essential helicase-related protein homologous to Snf2p	1045	HFKKEDSEPLGRI	1000	0	0	510247	2429	4024	eb04473_JV297_phos	eb04473.raw	U	K.KEDS#EPLGR.I	0	0	1	1	86.5658	107.293	78.4706	93.4766	269.782	283.021	232.605	275.41	91.4516	265.205	0.133542	0.0844621	2.89994	9.72223e-06
3943	YBR214W	SDS24	One of two S. cerevisiae homologs (Sds23p and Sds24p) of the S. pombe Sds23 protein, which is implicated in APC/cyclosome regulation; involved in cell separation during budding; may play an indirect role in fluid-phase endocytosis	470	IAIPPPSPASSTN	0	-9	7	510247	21368	28214	eb04473_JV297_phos	eb04473.raw	U	R.SSAIAIPPPS#PASSTNTPNLFEK.E	0	0	1	1	5.0668	9.86776	9.35859	11.3186	28.6433	30.7897	20.1507	23.5634	8.90294	25.7868	0.30202	0.187186	2.89643	0.00087556
260	YOR260W	GCD1	Gamma subunit of the translation initiation factor eIF2B, the guanine-nucleotide exchange factor for eIF2; activity subsequently regulated by phosphorylated eIF2; first identified as a negative regulator of GCN4 expression	37	DSTAATSGDKLNE	9.34047	-5	0	510246	1108	2141	eb04472_JV297_phos	eb04472.raw	U	K.DSTAATS#GDK.L	0	0	1	1	22.7528	22.4286	20.0913	14.4293	68.9531	58.2512	44.3341	54.538	19.9255	56.5191	0.19328	0.179857	2.83652	0.000522682
3552	YGL008C	PMA1	Plasma membrane H+-ATPase, pumps protons out of the cell; major regulator of cytoplasmic pH and plasma membrane potential; P2-type ATPase; Hsp30p plays a role in Pma1p regulation; interactions with Std1p appear to propagate [GAR+]	912	AMQRVSTQHEKET	1000	0	0	510246	1234	2308	eb04472_JV297_phos	eb04472.raw	R	R.VS#T#QHEK.E	1	1	3	1	35.862	36.8831	46.8138	63.2588	107.322	117.789	103.698	188.495	45.7044	129.326	0.277932	0.308492	2.82962	0.0071646
3187	YPL127C	HHO1	Histone H1, a linker histone required for nucleosome packaging at restricted sites; suppresses DNA repair involving homologous recombination; not required for telomeric silencing, basal transcriptional repression, or efficient sporulation	130	KKEKEVSPKPKQA	1000	0	0	510246	4405	6332	eb04472_JV297_phos	eb04472.raw	U	K.EVS#PKPK.Q	0	0	2	2	70.1465	68.7482	74.4107	67.4412	204.721	196.951	198.365	188.108	70.1866	197.036	0.0430984	0.034737	2.80732	4.3847e-08
360	YKR028W	SAP190	Protein that forms a complex with the Sit4p protein phosphatase and is required for its function; member of a family of similar proteins including Sap4p, Sap155p, and Sap185p	864	DDGKSKSAESEFT	13.3795	0	0	510247	6811	9792	eb04473_JV297_phos	eb04473.raw	U	K.S#AESEFTDK.I	1	1	3	2	87.6174	84.6544	91.2853	99.5281	310.777	230.777	247.66	210.257	90.7713	249.868	0.0709153	0.173655	2.75272	0.000348844
2366	YHR136C	SPL2	Protein with similarity to cyclin-dependent kinase inhibitors; downregulates low-affinity phosphate transport during phosphate limitation; overproduction suppresses a plc1 null mutation; GFP-fusion protein localizes to the cytoplasm	86	YTPRRTSQSQSLS	6.59058	-1	9	510246	9920	13291	eb04472_JV297_phos	eb04472.raw	U	R.TS#QSQSLSGSTFK.E	0	0	1	1	35.7066	35.2736	40.1722	37.8246	101.605	101.386	93.0719	112.993	37.2442	102.264	0.0603525	0.0800044	2.74577	4.87432e-06
3300	YNL088W	TOP2	Topoisomerase II, relieves torsional strain in DNA by cleaving and re-sealing the phosphodiester backbone of both positively and negatively supercoiled DNA; cleaves complementary strands; localizes to axial cores in meiosis	1314	ATSKENTPEQDDV	36.5564	0	0	510247	2797	4507	eb04473_JV297_phos	eb04473.raw	U	K.ENT#PEQDDVATK.K	0	0	1	1	9.54805	11.4563	11.9715	17.5791	41.1116	32.3677	38.0872	27.2146	12.6387	34.6953	0.273337	0.177714	2.74515	0.000783352
3626	YER161C	SPT2	Protein involved in negative regulation of transcription; required for RNA polyadenylation; exhibits regulated interactions with both histones and SWI-SNF components, has similarity to mammalian HMG1 proteins	173	RPQKKASPGATLR	18.8054	0	0	510246	3423	5100	eb04472_JV297_phos	eb04472.raw	U	K.KAS#PGATLR.G	0	0	2	2	168.507	153.087	184.798	174.654	495.314	495.049	495.06	378.248	170.262	465.918	0.0779668	0.125444	2.73648	6.25539e-05
676	YIL107C	PFK26	6-phosphofructo-2-kinase, inhibited by phosphoenolpyruvate and sn-glycerol 3-phosphate; has negligible fructose-2,6-bisphosphatase activity; transcriptional regulation involves protein kinase A	157	HHKRRPTTIDVPG	17.0091	0	0	510246	19604	25406	eb04472_JV297_phos	eb04472.raw	U	R.RPT#TIDVPGLTK.S	0	0	1	1	57.838	37.5564	31.4278	41.5234	102.581	112.737	99.5167	143.17	42.0864	114.501	0.268315	0.17406	2.72062	0.000731564
1611	YKR095W	MLP1	Myosin-like protein associated with the nuclear envelope, connects the nuclear pore complex with the nuclear interior; involved with Tel1p in telomere length control; involved with Pml1p and Pml39p in nuclear retention of unspliced mRNAs	333	KVIADDSKKQTPE	1000	0	0	510247	6040	8762	eb04473_JV297_phos	eb04473.raw	U	K.VIADDS#K.K	0	0	1	1	26.1347	26.6787	29.6685	25.3558	75.3673	62.3353	76.9538	73.1082	26.9594	71.9411	0.0699529	0.0916785	2.6685	1.21244e-05
2325	YLR114C	AVL9	Conserved protein involved in exocytic transport from the Golgi; mutation is synthetically lethal with apl2 vps1 double mutation; member of a protein superfamily with orthologs in diverse organisms	713	IEGGPESNKNSDS	1000	0	0	510247	17676	23672	eb04473_JV297_phos	eb04473.raw	U	K.DIEGGPES#NK.N	0	0	1	1	86.1595	75.5441	89.7862	77.6227	234.503	230.552	202.695	207.948	82.2781	218.924	0.082568	0.0727877	2.66078	4.11215e-06
4050	YJR005W	APL1	Beta-adaptin, large subunit of the clathrin associated protein complex (AP-2); involved in vesicle mediated transport; similar to mammalian beta-chain of the clathrin associated protein complex	687	KLSRKPSTLLRKL	9.34047	0	1	510247	9298	12953	eb04473_JV297_phos	eb04473.raw	U	R.KPS#TLLR.K	0	0	2	2	195.287	168.846	167.33	173.308	511.315	487.106	438.034	437.561	176.193	468.504	0.073668	0.0785668	2.65904	5.57658e-06
1973	YGR054W	YGR054W	Eukaryotic initiation factor (eIF) 2A; associates specifically with both 40S subunits and 80 S ribosomes, and interacts genetically with both eIF5b and eIF4E; homologous to mammalian eIF2A	563	NKKSSETSPDSTP	4.54047	-3	1	510246	6165	8534	eb04472_JV297_phos	eb04472.raw	U	K.SSET#SPDS#TPAPSAPASTNAPTNNK.E	1	1	3	1	8.04235	5.19688	10.0352	6.95324	19.9864	24.6238	22.1176	13.6013	7.55693	20.0823	0.268076	0.234938	2.65746	0.00276964
1131	YPL019C	VTC3	Subunit of the vacuolar transporter chaperone (VTC) complex involved in membrane trafficking, vacuolar polyphosphate accumulation, microautophagy and non-autophagic vacuolar fusion	627	SSDEEGTALPKKS	8.4635	0	0	510246	18976	24578	eb04472_JV297_phos	eb04472.raw	U	R.HVIADLEDHESS#DEEGT#ALPK.K	1	1	10	1	12.0695	10.3832	7.63053	9.05751	29.8169	23.1122	26.1131	24.2767	9.78519	25.8297	0.193433	0.11348	2.63967	9.31726e-05
2764	YLR175W	CBF5	Pseudouridine synthase catalytic subunit of box H/ACA small nucleolar ribonucleoprotein particles (snoRNPs), acts on both large and small rRNAs and on snRNA U2; mutations in human ortholog dyskerin cause the disorder dyskeratosis congenita	473	KSEDGDSEEKKSK	26.9265	0	0	510247	794	1840	eb04473_JV297_phos	eb04473.raw	U	K.SEDGDS#EEK.K	0	0	2	1	3.26235	6.88008	8.67153	9.44961	19.3822	15.6733	21.4991	17.8448	7.06589	18.5998	0.389829	0.132249	2.63234	0.000780073
3347	YGR138C	TPO2	Polyamine transport protein specific for spermine; localizes to the plasma membrane; transcription of TPO2 is regulated by Haa1p; member of the major facilitator superfamily	119	NRTATNSSSTGKE	6.59058	-4	3	510246	977	1972	eb04472_JV297_phos	eb04472.raw	U	R.TATNS#SSTGK.E	0	0	3	2	21.8087	14.6018	24.3906	26.3622	54.1957	67.3741	49.3934	56.6417	21.7908	56.9012	0.235999	0.133625	2.61124	0.000260579
3782	YGR157W	CHO2	Phosphatidylethanolamine methyltransferase (PEMT), catalyzes the first step in the conversion of phosphatidylethanolamine to phosphatidylcholine during the methylation pathway of phosphatidylcholine biosynthesis	582	GKTKRVSGVGKTL	1000	0	0	510246	2691	4165	eb04472_JV297_phos	eb04472.raw	U	K.RVS#GVGK.T	0	0	2	2	76.8026	77.9848	87.215	93.725	222.407	231.904	201.21	213.981	83.9318	217.376	0.095533	0.0599356	2.58991	2.27467e-06
1924	YMR196W	YMR196W	Putative protein of unknown function; green fluorescent protein (GFP)-fusion protein localizes to the cytoplasm; YMR196W is not an essential gene	1016	SGLTPQSSISSDK	6.59058	0	4	510246	15177	19844	eb04472_JV297_phos	eb04472.raw	U	R.IGGTHSGLT#PQS#SISSDK.A	3	3	6	1	25.8837	25.9213	25.7023	28.7671	73.206	65.332	67.8989	65.5157	26.5686	67.9882	0.0552823	0.0539768	2.55897	7.68855e-07
2314	YLR181C	VTA1	Multivesicular body (MVB) protein involved in endosomal protein sorting; regulates Vps4p activity by promoting its oligomerization; has an N-terminal Vps60- and Did2- binding domain, a linker region, and a C-terminal Vps4p binding domain	67	KEIGGESEAEDSD	30.6121	0	0	510246	4675	6668	eb04472_JV297_phos	eb04472.raw	U	K.EIGGES#EAEDSDK.S	0	0	2	2	46.1509	52.7683	49.6765	43.6015	110.204	135.942	102.857	141.501	48.0493	122.626	0.0835107	0.154636	2.55208	0.000252223
3809	YGL207W	SPT16	Subunit of the heterodimeric FACT complex (Spt16p-Pob3p), which associates with chromatin via interaction with Nhp6Ap and Nhp6Bp, and reorganizes nucleosomes to facilitate access to DNA by RNA and DNA polymerases	460	NNKKKSSPATKVP	9.34047	-1	3	510246	1835	3083	eb04472_JV297_phos	eb04472.raw	U	K.KSS#PATK.V	0	0	2	2	26.3139	21.0926	25.9834	20.5068	63.9332	61.1949	58.5967	55.0941	23.4742	59.7047	0.132076	0.0631052	2.54342	5.86434e-06
3159	YGR149W	YGR149W	Putative protein of unknown function; predicted to be an integal membrane protein	78	HLNRSRSFLQLED	11.0148	-2	0	510246	21851	28101	eb04472_JV297_phos	eb04472.raw	U	R.SRS#FLQLEDFK.V	0	0	2	2	99.8542	95.3217	84.2481	88.2878	252.2	239.582	223.526	219.24	91.928	233.637	0.0760359	0.0648856	2.54152	2.67014e-06
1655	YGR186W	TFG1	TFIIF (Transcription Factor II) largest subunit; involved in both transcription initiation and elongation of RNA polymerase II; homologous to human RAP74	673	VAEREETPAPTIT	0.737891	-8	6	510246	12408	16407	eb04472_JV297_phos	eb04472.raw	U	K.QEEGLNSTVAEREET#PAPTITEK.D	0	0	1	1	11.5915	7.11152	6.80814	9.18821	16.4074	21.2027	23.3298	27.0212	8.67484	21.9903	0.255165	0.201483	2.53495	0.00170062
3702	YDR088C	SLU7	RNA splicing factor, required for ATP-independent portion of 2nd catalytic step of spliceosomal RNA splicing; interacts with Prp18p; contains zinc knuckle domain	293	MFRRHLTGEGLKL	1000	0	0	510246	6753	9272	eb04472_JV297_phos	eb04472.raw	U	R.HLT#GEGLK.L	0	0	3	3	96.1975	96.9734	105.807	93.9994	322.42	224.81	254.179	185.34	98.2444	246.687	0.0528971	0.234436	2.51095	0.00219333
2580	YCR088W	ABP1	Actin-binding protein of the cortical actin cytoskeleton, important for activation of the Arp2/3 complex that plays a key role actin in cytoskeleton organization	157	QQGKASTPPVKKS	9.34047	-1	0	510246	4099	5951	eb04472_JV297_phos	eb04472.raw	U	K.AST#PPVK.K	0	0	4	4	254.344	260.486	270.545	254.277	667.371	607.215	676.058	630.735	259.913	645.345	0.0294826	0.0497772	2.48293	4.05502e-07
3633	YPL101W	ELP4	Subunit of Elongator complex, which is required for modification of wobble nucleosides in tRNA; required for Elongator structural integrity	222	DEKRLGSPDRDDI	47.8439	0	0	510247	7905	11170	eb04473_JV297_phos	eb04473.raw	U	R.LGS#PDRDDIQQNSEYK.D	0	0	2	2	39.8891	29.5612	43.8469	37.4717	98.2006	96.2543	96.387	78.9598	37.6922	92.4504	0.159823	0.097755	2.45277	5.52438e-05
265	YKL005C	BYE1	Negative regulator of transcription elongation, contains a TFIIS-like domain and a PHD finger, multicopy suppressor of temperature-sensitive ess1 mutations, probably binds RNA polymerase II large subunit	422	EQTHAISKEPSPS	58.5514	0	0	510246	6368	8785	eb04472_JV297_phos	eb04472.raw	U	K.IEQTHAIS#K.E	0	0	2	2	104.682	118.624	108.306	147.22	330.879	271.247	257.976	311.245	119.708	292.837	0.160969	0.116097	2.44626	0.000114949
2607	YBR072W	HSP26	Small heat shock protein (sHSP) with chaperone activity; forms hollow, sphere-shaped oligomers that suppress unfolded proteins aggregation; oligomer activation requires heat-induced conformational change; also has mRNA binding activity	42	RRQLANTPAKDST	1000	0	0	510246	4086	5935	eb04472_JV297_phos	eb04472.raw	U	R.QLANT#PAK.D	0	0	2	2	81.021	79.3944	78.3352	82.6285	200.445	176.716	173.032	228.598	80.3448	194.698	0.0234113	0.131784	2.42328	0.000112841
61	YPL085W	SEC16	COPII vesicle coat protein required for ER transport vesicle budding; Sec16p is bound to the periphery of ER membranes and may act to stabilize initial COPII complexes; interacts with Sec23p, Sec24p and Sec31p	313	LFQDDESDQKVPW	5.2156	-13	0	510247	14630	19746	eb04473_JV297_phos	eb04473.raw	U	R.NSGDDTSMLFQDDES#DQK.V	0	0	2	2	25.1309	27.4677	29.9079	31.7601	76.4247	58.0258	62.1964	78.5125	28.5666	68.7898	0.101072	0.148287	2.40805	0.000272463
2763	YLR175W	CBF5	Pseudouridine synthase catalytic subunit of box H/ACA small nucleolar ribonucleoprotein particles (snoRNPs), acts on both large and small rRNAs and on snRNA U2; mutations in human ortholog dyskerin cause the disorder dyskeratosis congenita	378	GRVNENTPEQWKK	1000	0	0	510247	9235	12875	eb04473_JV297_phos	eb04473.raw	U	R.VNENT#PEQWK.K	0	0	2	2	175.617	170.14	162.157	173.922	386.679	411.657	418.44	400.457	170.459	404.308	0.0351395	0.034371	2.37188	7.61771e-08
2573	YCR088W	ABP1	Actin-binding protein of the cortical actin cytoskeleton, important for activation of the Arp2/3 complex that plays a key role actin in cytoskeleton organization	183	EPVKTPSPAPAAK	1000	0	0	510246	3008	4568	eb04472_JV297_phos	eb04472.raw	U	K.T#PS#PAPAAK.I	1	1	9	1	86.7929	75.4494	70.6214	61.7296	189.081	166.665	188.976	152.999	73.6483	174.43	0.141811	0.101794	2.36842	6.55648e-05
2447	YLR258W	GSY2	Glycogen synthase, similar to Gsy1p; expression induced by glucose limitation, nitrogen starvation, heat shock, and stationary phase; activity regulated by cAMP-dependent, Snf1p and Pho85p kinases as well as by the Gac1p-Glc7p phosphatase	651	KVARPLSVPGSPR	1000	0	0	510246	9179	12347	eb04472_JV297_phos	eb04472.raw	U	K.VARPLS#VPGS#PR.D	1	1	8	4	197.486	192.8	211.916	217.772	465.207	519.076	460.906	489.742	204.994	483.733	0.0574629	0.0553356	2.35974	1.3476e-06
2057	YBL058W	SHP1	UBX (ubiquitin regulatory X) domain-containing protein that regulates Glc7p phosphatase activity and interacts with Cdc48p; interacts with ubiquitylated proteins in vivo and is required for degradation of a ubiquitylated model substrate	331	EVPKNETPAAQEQ	1000	0	0	510246	5694	7941	eb04472_JV297_phos	eb04472.raw	U	K.NET#PAAQEQPMPDNEPK.Q	0	0	4	3	29.397	27.1837	25.619	25.0421	70.0454	57.5086	62.0356	62.6141	26.8105	63.0509	0.0726325	0.0823413	2.35173	1.23582e-05
1857	YML123C	PHO84	High-affinity inorganic phosphate (Pi) transporter and low-affinity manganese transporter; regulated by Pho4p and Spt7p; mutation confers resistance to arsenate; exit from the ER during maturation requires Pho86p	317	GLERASTAVESLD	1000	0	0	510246	11982	15865	eb04472_JV297_phos	eb04472.raw	U	R.AS#T#AVES#LDNHPPK.A	1	1	3	1	19.5861	21.6396	20.0184	19.8272	49.0829	47.2852	34.302	58.4431	20.2678	47.2783	0.0459593	0.210203	2.33268	0.00164506
2513	YFL014W	HSP12	Plasma membrane protein involved in maintaining membrane organization in stress conditions; induced by heat shock, oxidative stress, osmostress, stationary phase, glucose depletion, oleate and alcohol; regulated by HOG and Ras-Pka pathways	59	FQGVHDSAEKGKD	1000	0	0	510246	8658	11703	eb04472_JV297_phos	eb04472.raw	U	K.GVFQGVHDS#AEK.G	0	0	3	3	169.69	265.882	152.746	187.816	492.061	419.308	404.425	493.828	194.034	452.405	0.257657	0.10435	2.33158	0.000287377
2576	YCR088W	ABP1	Actin-binding protein of the cortical actin cytoskeleton, important for activation of the Arp2/3 complex that plays a key role actin in cytoskeleton organization	365	FEGLAASEKEEEE	1000	0	0	510246	15275	19964	eb04472_JV297_phos	eb04472.raw	U	K.FEGLAAS#EK.E	0	0	9	9	500.956	504.182	520.198	553.815	1311.26	1167.86	1132.62	1228.78	519.788	1210.13	0.0465482	0.0646621	2.32812	2.78463e-06
3392	YOL036W	YOL036W	Protein of unknown function; potential Cdc28p substrate	606	SSTDDISPLREEG	7.64917	-12	0	510246	16229	21148	eb04472_JV297_phos	eb04472.raw	U	R.ASTSLPESSTDDIS#PLREEGK.I	0	0	2	2	43.4861	40.8702	39.9328	32.0999	99.6647	93.788	82.2605	87.3623	39.0972	90.7689	0.12536	0.0834795	2.32162	2.6611e-05
404	YBL051C	PIN4	Protein involved in G2/M phase progression and response to DNA damage, interacts with Rad53p; contains an RNA recognition motif, a nuclear localization signal, and several SQ/TQ cluster domains; hyperphosphorylated in response to DNA damage	52	NGVQTETGENSAK	11.7212	-2	4	510246	2041	3342	eb04472_JV297_phos	eb04472.raw	U	K.ENGVQTET#GENSAK.N	0	0	1	1	21.1515	21.4187	18.4257	21.7877	45.562	47.736	45.8308	52.4464	20.6959	47.8938	0.0742069	0.0665139	2.31417	4.77283e-06
950	YKR074W	AIM29	Putative protein of unknown function; epitope-tagged protein localizes to the cytoplasm; YKR074W is not an essential gene; null mutant displays elevated frequency of mitochondrial genome loss	12	RLKMSTTFHDYDL	6.59058	-2	12	510247	19744	26293	eb04473_JV297_phos	eb04473.raw	U	K.MSTT#FHDYDLEEPLTSNAR.P	0	0	3	2	43.7609	41.7644	45.1378	48.6988	114.015	80.939	109.103	108.375	44.8405	103.108	0.0651499	0.145383	2.29944	0.000264253
609	YMR205C	PFK2	Beta subunit of heterooctameric phosphofructokinase involved in glycolysis, indispensable for anaerobic growth, activated by fructose-2,6-bisphosphate and AMP, mutation inhibits glucose induction of cell cycle-related genes	160	PPAPEASAESGLS	4.9882	-12	0	510246	14623	19157	eb04472_JV297_phos	eb04472.raw	U	K.NAVSTKPTPPPAPEAS#AES#GLSSK.V	2	1	4	2	82.5267	67.1176	95.3452	64.6181	184.258	200.306	158.188	161.196	77.4019	175.987	0.185344	0.113427	2.27368	0.000200537
102	YPL237W	SUI3	Beta subunit of the translation initiation factor eIF2, involved in the identification of the start codon; proposed to be involved in mRNA binding	112	DNVDAESKEGTPS	1000	0	0	510246	9210	12391	eb04472_JV297_phos	eb04472.raw	U	K.AGLDNVDAES#K.E	0	0	2	2	54.3964	53.9886	53.4449	55.8742	140.463	124.564	107.743	120.368	54.4261	123.284	0.0191299	0.109506	2.26517	5.25841e-05
3030	YNR051C	BRE5	Ubiquitin protease cofactor, forms deubiquitination complex with Ubp3p that coregulates anterograde and retrograde transport between the endoplasmic reticulum and Golgi compartments; null is sensitive to brefeldin A	282	IKTKEGSVEAINA	126.313	0	0	510247	15564	20946	eb04473_JV297_phos	eb04473.raw	U	K.EGS#VEAINAVNNSSLPNGK.E	0	0	2	1	19.8251	22.9126	22.9228	21.6701	43.7261	55.3075	51.62	46.8004	21.8326	49.3635	0.06696	0.103806	2.261	4.80342e-05
1757	YGL049C	TIF4632	Translation initiation factor eIF4G, subunit of the mRNA cap-binding protein complex (eIF4F) that also contains eIF4E (Cdc33p); associates with the poly(A)-binding protein Pab1p, also interacts with eIF4A (Tif1p); homologous to Tif4631p	196	PFEKEATPVLPAN	1000	0	0	510246	14996	19622	eb04472_JV297_phos	eb04472.raw	U	K.EAT#PVLPANEAVK.D	0	0	3	3	95.3491	94.1856	109.18	115.264	232.598	236.253	227.979	227.703	103.495	231.133	0.100392	0.0176762	2.23328	4.58401e-07
2098	YAL017W	PSK1	One of two (see also PSK2) PAS domain containing S/T protein kinases; coordinately regulates protein synthesis and carbohydrate metabolism and storage in response to a unknown metabolite that reflects nutritional status	1035	SSGKGLSPLEEEK	1000	0	0	510246	15384	20099	eb04472_JV297_phos	eb04472.raw	U	K.GLS#PLEEEK.L	0	0	3	3	171.435	168.594	177.73	167.361	399.705	379.674	350.17	389.322	171.28	379.718	0.0270082	0.0561711	2.21694	1.33167e-06
39	YJL020C	BBC1	Protein possibly involved in assembly of actin patches; interacts with an actin assembly factor Las17p and with the SH3 domains of Type I myosins Myo3p and Myo5p; localized predominantly to cortical actin patches	166	KLKARLSMFNQDI	16.1979	0	0	510247	21661	28561	eb04473_JV297_phos	eb04473.raw	U	K.ARLS#MFNQDITEQVPLPK.S	0	0	2	2	57.2764	61.4263	55.1001	54.4627	140.556	124.312	111.726	129.423	57.0664	126.504	0.0551346	0.0945467	2.21679	2.9799e-05
2555	YBR245C	ISW1	Member of the imitation-switch (ISWI) class of ATP-dependent chromatin remodeling complexes; ATPase that forms a complex with Ioc2p and Ioc4p to regulate transcription elongation, and a complex with Ioc3p to repress transcription initiation	691	SGTSTGSAGTPEP	0	-6	8	510246	2480	3895	eb04472_JV297_phos	eb04472.raw	U	K.SGTSTGS#AGTPEPGSGEK.G	0	0	1	1	5.4492	6.5224	7.29741	6.46965	13.2119	13.9363	16.5758	12.8759	6.43466	14.15	0.117823	0.118492	2.19902	0.000156541
419	YFR040W	SAP155	Protein that forms a complex with the Sit4p protein phosphatase and is required for its function; member of a family of similar proteins including Sap4p, Sap185p, and Sap190p	58	TSDSLDSIPEEYS	8.59442	-6	6	510247	15021	20242	eb04473_JV297_phos	eb04473.raw	U	R.GTSDSLDS#IPEEYSHGDEVK.T	0	0	6	6	100.547	103.022	86.2573	83.3212	256.453	187.801	193.578	167.664	93.287	201.374	0.106519	0.190504	2.15865	0.00157997
4057	YKR063C	LAS1	Essential nuclear protein possibly involved in bud formation and morphogenesis; mutants require the SSD1-v allele for viability	444	PLKKEVSPALKAD	1000	0	0	510247	8216	11568	eb04473_JV297_phos	eb04473.raw	U	K.EVS#PALK.A	0	0	1	1	102.698	95.5847	95.8761	81.6091	225.172	198.714	181.097	203.136	93.9421	202.03	0.0942562	0.0897344	2.15058	3.90249e-05
121	YJR104C	SOD1	Cytosolic copper-zinc superoxide dismutase; some mutations are analogous to those that cause ALS (amyotrophic lateral sclerosis) in humans	103	KGSFKDSLIKLIG	18.8054	0	0	510247	16470	22105	eb04473_JV297_phos	eb04473.raw	U	K.GSFKDS#LIK.L	0	0	1	1	135.405	155.433	121.464	120.231	302.364	279.216	289.891	271.783	133.133	285.813	0.123048	0.046545	2.14682	6.82767e-06
2609	YOR273C	TPO4	Polyamine transport protein, recognizes spermine, putrescine, and spermidine; localizes to the plasma membrane; member of the major facilitator superfamily	608	SLRRTHTQPVPAS	20.1669	0	0	510246	3596	5312	eb04472_JV297_phos	eb04472.raw	U	R.THT#QPVPASFDR.E	0	0	2	2	91.2143	91.4924	80.9377	83.8833	223.72	188.372	167.651	162.876	86.882	185.655	0.061032	0.14912	2.13686	0.000420819
151	YJR060W	CBF1	Dual function helix-loop-helix protein; binds the motif CACRTG present at several sites including MET gene promoters and centromere DNA element I (CDEI); affects nucleosome positioning at this motif; associates with other transcription factors such as Met4p and Isw1p to mediate transcriptional activation or repression; associates with kinetochore proteins and required for efficient chromosome seg…	138	NGERAITPSNEGV	17.0091	0	0	510246	7195	9841	eb04472_JV297_phos	eb04472.raw	U	R.AIT#PSNEGVK.P	1	1	8	5	273.571	289.111	284.078	291.487	760.564	589.977	575.415	503.839	284.562	607.449	0.0279427	0.179106	2.13468	0.00103501
2775	YFR053C	HXK1	Hexokinase isoenzyme 1, a cytosolic protein that catalyzes phosphorylation of glucose during glucose metabolism; expression is highest during growth on non-glucose carbon sources; glucose-induced repression involves the hexokinase Hxk2p	293	VAVDEQSPRPGQQ	49.0967	0	0	510247	13703	18547	eb04473_JV297_phos	eb04473.raw	U	K.YDVAVDEQS#PRPGQQAFEK.M	0	0	1	1	14.7941	15.5591	12.263	17.187	29.8634	30.3919	35.3164	31.7363	14.9508	31.827	0.137183	0.077174	2.12878	4.26978e-05
1829	YBL034C	STU1	Component of the mitotic spindle that binds to interpolar microtubules via its association with beta-tubulin (Tub2p); required for interpolar microtubules to provide an outward force on the spindle poles	997	KVEDIISRESSVS	1000	0	0	510246	10081	13491	eb04472_JV297_phos	eb04472.raw	U	K.VEDIIS#R.E	0	0	2	2	169.272	168.888	146.937	139.209	347.636	359.982	286.65	329.755	156.076	331.006	0.0983102	0.0968825	2.12079	6.34515e-05
3429	YLR223C	IFH1	Coactivator that regulates transcription of ribosomal protein (RP) genes; recruited to RP gene promoters during optimal growth conditions via Fhl1p; subunit of CURI, a complex that coordinates RP production and pre-rRNA processing	757	QHQRAQTPDVKRE	1000	0	0	510246	3213	4836	eb04472_JV297_phos	eb04472.raw	U	R.AQT#PDVK.R	0	0	3	3	146.495	145.86	164.582	128.138	309.743	321.197	286.897	321.679	146.269	309.879	0.101736	0.0525494	2.11856	5.9035e-06
1572	YDL065C	PEX19	Chaperone and import receptor for newly-synthesized class I peroxisomal membrane proteins (PMPs), binds PMPs in the cytoplasm and delivers them to the peroxisome for subsequent insertion into the peroxisomal membrane	62	VQVANESEEDPEL	55.4614	0	0	510247	10751	14797	eb04473_JV297_phos	eb04473.raw	U	K.DSDGVQVANES#EEDPELK.E	0	0	3	3	71.5566	76.6172	65.4581	69.5847	167.828	132.706	138.94	159.818	70.8041	149.823	0.0654497	0.111387	2.11602	9.74077e-05
114	YLR330W	CHS5	Component of the exomer complex, which also contains Csh6p, Bch1p, Bch2p, and Bud7p and is involved in export of selected proteins, such as chitin synthase Chs3p, from the Golgi to the plasma membrane	590	KPEEKGSEAEDDI	64.7298	0	0	510247	6671	9610	eb04473_JV297_phos	eb04473.raw	U	K.GS#EAEDDINNVSK.E	0	0	5	5	190.34	175.726	178.625	188.718	415.984	358.312	377.273	400.046	183.352	387.904	0.039595	0.065297	2.11562	4.51688e-06
1809	YOL130W	ALR1	Plasma membrane Mg(2+) transporter, expression and turnover are regulated by Mg(2+) concentration; overexpression confers increased tolerance to Al(3+) and Ga(3+) ions	383	SLHPGISFGKNKV	26.1051	0	0	510247	18830	25152	eb04473_JV297_phos	eb04473.raw	U	K.PSLHPGIS#FGK.N	0	0	1	1	10.504	12.0244	6.23559	7.68516	24.1347	22.4492	18.1097	11.3041	9.11229	18.9994	0.288472	0.301255	2.08503	0.0200791
105	YPL237W	SUI3	Beta subunit of the translation initiation factor eIF2, involved in the identification of the start codon; proposed to be involved in mRNA binding	92	KKTKDSSVDAFEK	9.34047	-1	0	510246	9814	13155	eb04472_JV297_phos	eb04472.raw	U	K.DSS#VDAFEK.E	0	0	2	2	130.805	124.157	136.944	145.809	284.283	279.136	288.023	265.194	134.429	279.159	0.0685125	0.0358128	2.07664	6.99352e-07
3306	YJL084C	ALY2	Alpha arrestin that controls nutrient-mediated intracellular sorting of permease Gap1p; interacts with AP-1 subunit Apl4p; phosphorylated by Npr1p and also by cyclin-CDK complex Pcl7p-Pho85p; promotes endocytosis of plasma membrane proteins	213	GPSRNLSPINLLK	1000	0	0	510246	23073	29536	eb04472_JV297_phos	eb04472.raw	U	R.NLS#PINLLK.R	0	0	1	1	93.0547	84.686	92.6074	99.9332	181.841	184.699	175.258	224.39	92.5703	191.547	0.0673499	0.116157	2.06921	0.000138884
194	YGL120C	PRP43	RNA helicase in the DEAH-box family, functions in both RNA polymerase I and polymerase II transcript metabolism, involved in release of the lariat-intron from the spliceosome	38	KQHPLPSEEPLVH	1000	0	0	510246	12236	16182	eb04472_JV297_phos	eb04472.raw	U	K.QHPLPS#EEPLVHHDAGEFK.G	0	0	1	1	41.359	40.5441	40.9633	38.7656	90.4036	81.9733	75.6054	85.4038	40.408	83.3465	0.02832	0.0745572	2.06262	9.84694e-06
1700	YKR093W	PTR2	Integral membrane peptide transporter, mediates transport of di- and tri-peptides; conserved protein that contains 12 transmembrane domains; PTR2 expression is regulated by the N-end rule pathway via repression by Cup9p	45	SDDVANSTERYNL	9.34047	-9	1	510247	2578	4224	eb04473_JV297_phos	eb04473.raw	U	K.DSYVSDDVANS#TER.Y	0	0	1	1	21.5459	14.3072	21.5487	16.4682	39.0432	39.5281	34.5742	37.9747	18.4675	37.78	0.198404	0.0591209	2.04576	0.0001052
3566	YMR104C	YPK2	Protein kinase with similarity to serine/threonine protein kinase Ypk1p; functionally redundant with YPK1 at the genetic level; participates in a signaling pathway required for optimal cell wall integrity; homolog of mammalian kinase SGK	21	KEDDGSSEDENEK	0	-7	0	510246	1582	2755	eb04472_JV297_phos	eb04472.raw	U	R.SKEDDGSS#EDENEK.S	0	0	1	1	24.2824	22.4707	22.3086	22.4412	32.0131	59.2855	40.2396	55.215	22.8757	46.6883	0.04111	0.273271	2.04095	0.00982091
3992	YIL079C	AIR1	Zinc knuckle protein, involved in nuclear RNA processing and degradation as a component of the TRAMP complex; stimulates the poly(A) polymerase activity of Pap2p in vitro; functionally redundant with Air2p	21	PYVKDTTPTGSDS	9.34047	-1	8	510247	4528	6790	eb04473_JV297_phos	eb04473.raw	U	K.DTT#PTGSDSSSFNK.L	0	0	2	2	36.8299	43.0058	34.6445	38.648	88.7071	66.91	78.6485	77.2672	38.282	77.8832	0.0927089	0.114491	2.03446	0.00017116
2687	YKR001C	VPS1	Dynamin-like GTPase required for vacuolar sorting; also involved in actin cytoskeleton organization, endocytosis, late Golgi-retention of some proteins, regulation of peroxisome biogenesis	599	KLAALESPPPVLK	1000	0	0	510246	22925	29364	eb04472_JV297_phos	eb04472.raw	U	K.LAALES#PPPVLK.A	0	0	2	2	62.6539	73.7452	71.7874	83.6088	158.125	143.473	140.263	145.286	72.9488	146.787	0.117818	0.0534029	2.01219	1.46487e-05
600	YIR003W	AIM21	Protein of unknown function involved in mitochondrial migration along actin filament; may interact with ribosomes; GFP-fusion protein colocalizes with Sac1p to the actin cytoskeleton	58	PILKAKTMTSFES	4.54047	0	12	510247	11368	15573	eb04473_JV297_phos	eb04473.raw	U	K.T#M*TSFESGM*DQESLPK.V	0	0	2	2	43.4502	37.5774	49.968	45.7973	102.454	81.0053	106.815	65.3102	44.1982	88.896	0.117013	0.217688	2.0113	0.00426965
2572	YCR088W	ABP1	Actin-binding protein of the cortical actin cytoskeleton, important for activation of the Arp2/3 complex that plays a key role actin in cytoskeleton organization	181	KKEPVKTPSPAPA	1000	0	0	510246	3008	4568	eb04472_JV297_phos	eb04472.raw	U	K.T#PS#PAPAAK.I	1	1	10	1	38.4432	37.367	36.435	32.309	75.7624	72.32	69.7173	72.3345	36.1386	72.5336	0.0742041	0.0341824	2.0071	1.03536e-06
3384	YCR021C	HSP30	Hydrophobic plasma membrane localized, stress-responsive protein that negatively regulates the H(+)-ATPase Pma1p; induced by heat shock, ethanol treatment, weak organic acid, glucose limitation, and entry into stationary phase	331	EQAVEDTAxxxxx	59.294	0	0	510247	6803	9782	eb04473_JV297_phos	eb04473.raw	U	R.ASGETAIHEPEPEAEQAVEDT#A.-	0	0	3	3	47.6686	56.6502	44.305	46.0979	110.076	80.3689	97.5251	102.487	48.6804	97.6143	0.112736	0.129103	2.00521	0.000386114
3292	YNL115C	YNL115C	Putative protein of unknown function; green fluorescent protein (GFP)-fusion protein localizes to mitochondria; YNL115C is not an essential gene	56	EGRDIESDGFIKD	1000	0	0	510246	18688	24224	eb04472_JV297_phos	eb04472.raw	U	R.DIES#DGFIK.D	0	0	3	3	176.31	161.577	193.158	190.351	387.039	348.698	332.382	374.802	180.349	360.73	0.0805315	0.0686272	2.00018	1.55209e-05
2643	YER151C	UBP3	Ubiquitin-specific protease that interacts with Bre5p to co-regulate anterograde and retrograde transport between the ER and Golgi; inhibitor of gene silencing; cleaves ubiquitin fusions but not polyubiquitin; also has mRNA binding activity	335	SVEENTSKTSSPS	0	-6	0	510247	4225	6390	eb04473_JV297_phos	eb04473.raw	U	K.KEPEESVEENTS#K.T	0	0	1	1	45.4817	39.692	34.1136	37.8115	75.9367	82.0396	73.0943	81.9823	39.2747	78.2632	0.120757	0.0572482	1.99271	2.07873e-05
3307	YJL084C	ALY2	Alpha arrestin that controls nutrient-mediated intracellular sorting of permease Gap1p; interacts with AP-1 subunit Apl4p; phosphorylated by Npr1p and also by cyclin-CDK complex Pcl7p-Pho85p; promotes endocytosis of plasma membrane proteins	838	SLNRRESVQDNLP	55.37	0	0	510247	6212	8999	eb04473_JV297_phos	eb04473.raw	U	R.RES#VQDNLPSTIR.H	0	0	1	1	30.1021	33.8008	25.9313	32.1261	70.975	62.5342	63.5447	45.8936	30.49	60.7369	0.111335	0.174309	1.99202	0.00160071
2577	YCR088W	ABP1	Actin-binding protein of the cortical actin cytoskeleton, important for activation of the Arp2/3 complex that plays a key role actin in cytoskeleton organization	169	SFTPSKSPAPVSK	51.0043	0	0	510246	3487	5176	eb04472_JV297_phos	eb04472.raw	U	K.S#PAPVSK.K	1	1	6	4	339.213	349.653	319.597	302.858	722.869	651.437	640.519	596.267	327.83	652.773	0.0634297	0.0803753	1.99119	2.57752e-05
760	YKR018C	YKR018C	Putative protein of unknown function; green fluorescent protein (GFP)-fusion protein localizes to the cytoplasm and nucleus	193	SEDKESTPATFIT	9.34047	-1	21	510246	23847	30460	eb04472_JV297_phos	eb04472.raw	U	K.EST#PATFITGGDAFNSVDIPYELTPEEQK.D	0	0	2	1	7.75555	11.2143	16.1355	8.22103	7.47166	34.0384	15.0667	29.5963	10.8316	21.5433	0.355791	0.575372	1.98893	0.149952
1575	YDR361C	BCP1	Essential protein involved in nuclear export of Mss4p, which is a lipid kinase that generates phosphatidylinositol 4,5-biphosphate and plays a role in actin cytoskeleton organization and vesicular transport	205	YEVNFDTDDDTDS	28.5286	0	0	510246	13829	18174	eb04472_JV297_phos	eb04472.raw	U	R.KYEVNFDT#DDDTDSGK.R	0	0	4	4	116.166	124.157	126.846	123.708	274.836	247.896	224.689	228.598	122.719	244.005	0.0373475	0.0939395	1.98832	4.6878e-05
3184	YBR079C	RPG1	eIF3a subunit of the core complex of translation initiation factor 3 (eIF3), essential for translation; part of a Prt1p-Rpg1p-Nip1p subcomplex that stimulates binding of mRNA and tRNA(i)Met to ribosomes; involved in translation reinitiation	504	IFASTASKEVSEE	7.97117	-3	0	510246	23670	30248	eb04472_JV297_phos	eb04472.raw	U	K.DPFDIFASTAS#K.E	0	0	1	1	89.1829	88.5784	86.1532	88.497	98.1774	226.428	175.184	197.853	88.1028	174.41	0.0151563	0.315216	1.97962	0.0200974
3360	YBR054W	YRO2	Protein of unknown function with similarity to archaeal rhodopsins; the authentic, non-tagged protein is detected in a phosphorylated state in highly purified mitochondria in high-throughput studies; transcriptionally regulated by Haa1p	293	KMPSPASFKSSDS	1000	0	0	510246	19265	24962	eb04472_JV297_phos	eb04472.raw	U	K.KMPS#PAS#FK.S	1	1	3	2	45.2905	41.9958	45.8665	49.0125	103.127	81.5755	88.495	85.5972	45.5413	89.6988	0.0631184	0.104698	1.96961	0.000105793
2741	YFR016C	YFR016C	Putative protein of unknown function; green fluorescent protein (GFP)-fusion protein localizes to the cytoplasm and bud; interacts with Spa2p; YFL016C is not an essential gene	523	GGDEKQSEAGEKS	1000	0	0	510247	7956	11233	eb04473_JV297_phos	eb04473.raw	U	K.GEEIMGGDEKQS#EAGEK.S	0	0	1	1	38.2759	42.8164	35.1546	25.2251	58.4021	70.2647	59.376	89.3572	35.368	69.35	0.210864	0.207372	1.96081	0.00571544
1038	YLR055C	SPT8	Subunit of the SAGA transcriptional regulatory complex but not present in SAGA-like complex SLIK/SALSA, required for SAGA-mediated inhibition at some promoters	131	VDGGVGSREASSS	36.5564	0	0	510246	5983	8301	eb04472_JV297_phos	eb04472.raw	U	K.LSDVDGGVGS#R.E	0	0	1	1	20.6615	34.0953	25.442	21.6178	53.8819	53.9417	50.9768	40.3443	25.4542	49.7862	0.240425	0.129451	1.95591	0.00154989
1580	YBL066C	SEF1	Putative transcription factor, has homolog in Kluyveromyces lactis	846	ETVTKTTPSGTTV	0	-1	12	510247	19313	25766	eb04473_JV297_phos	eb04473.raw	U	K.TT#PSGTTVTTLVPTK.N	0	0	1	1	17.5665	21.3872	17.9364	12.0375	34.2441	36.0009	28.8345	35.061	17.2319	33.5351	0.224398	0.0958673	1.94611	0.00063956
407	YBL051C	PIN4	Protein involved in G2/M phase progression and response to DNA damage, interacts with Rad53p; contains an RNA recognition motif, a nuclear localization signal, and several SQ/TQ cluster domains; hyperphosphorylated in response to DNA damage	466	MQPTLTSPKMNIH	6.59058	-13	0	510246	16091	20978	eb04472_JV297_phos	eb04472.raw	U	K.ISSQGQFSM*QPTLTS#PK.M	0	0	6	5	123.922	114.668	117.623	120.95	220.362	226.627	219.555	259.645	119.29	231.547	0.0336532	0.0820421	1.94104	2.51631e-05
607	YMR205C	PFK2	Beta subunit of heterooctameric phosphofructokinase involved in glycolysis, indispensable for anaerobic growth, activated by fructose-2,6-bisphosphate and AMP, mutation inhibits glucose induction of cell cycle-related genes	42	SLENRSSPDENST	9.34047	-1	14	510246	21616	27827	eb04472_JV297_phos	eb04472.raw	U	R.SS#PDENSTLLSNDSISLK.I	0	0	1	1	44.7647	45.8041	46.9803	42.5428	101.64	87.7149	77.5475	82.3571	45.023	87.3149	0.0418663	0.119269	1.93934	0.000204559
602	YIR003W	AIM21	Protein of unknown function involved in mitochondrial migration along actin filament; may interact with ribosomes; GFP-fusion protein colocalizes with Sac1p to the actin cytoskeleton	18	RPSRRKTSELFPL	0	0	11	510246	20725	26786	eb04472_JV297_phos	eb04472.raw	U	R.RKT#SELFPLSGSESGDIK.A	0	0	4	4	151.837	151.078	162.583	156.592	369.621	268.104	316.845	248.909	155.522	300.87	0.0340929	0.179556	1.93457	0.00173598
2829	YIL126W	STH1	ATPase component of the RSC chromatin remodeling complex; required for expression of early meiotic genes; essential helicase-related protein homologous to Snf2p	1188	EEVKSSSVEIING	6.59058	-2	9	510246	10428	13933	eb04472_JV297_phos	eb04472.raw	U	K.SSS#VEIINGSESK.K	0	0	1	1	25.5133	20.3246	17.4784	16.6904	37.7999	40.6684	37.7656	38.4946	20.0017	38.6821	0.199594	0.0353169	1.93394	0.000115402
2358	YML101C	CUE4	Protein of unknown function; has a CUE domain that binds ubiquitin, which may facilitate intramolecular monoubiquitination	48	VATNDPSPEPVPS	47.0452	0	0	510247	9782	13575	eb04473_JV297_phos	eb04473.raw	U	K.PAPSVATNDPS#PEPVPSAPEER.V	0	0	3	3	38.6224	35.7049	40.0681	46.5031	79.016	63.6745	80.7637	85.9357	40.2246	77.3475	0.113416	0.123819	1.92289	0.00042384
3719	YJL098W	SAP185	Protein that forms a complex with the Sit4p protein phosphatase and is required for its function; member of a family of similar proteins including Sap4p, Sap155p, and Sap190p	35	IDDKPTSTEAGKI	6.59058	-1	1	510247	6655	9586	eb04473_JV297_phos	eb04473.raw	U	K.IDDKPTS#TEAGK.I	0	0	2	2	63.825	72.1672	59.1392	63.8077	124.961	125.983	114.707	132.228	64.7348	124.47	0.0837781	0.0583119	1.92277	1.17478e-05
598	YIR003W	AIM21	Protein of unknown function involved in mitochondrial migration along actin filament; may interact with ribosomes; GFP-fusion protein colocalizes with Sac1p to the actin cytoskeleton	167	GNESAISPSNLVN	11.0148	-3	2	510246	13460	17711	eb04472_JV297_phos	eb04472.raw	U	K.NEHEGAEGNESAIS#PSNLVNK.S	0	0	2	2	23.3981	34.1374	32.3543	30.7929	54.7883	52.8013	64.3487	59.7488	30.1707	57.9218	0.156353	0.0895333	1.9198	0.000215568
606	YMR205C	PFK2	Beta subunit of heterooctameric phosphofructokinase involved in glycolysis, indispensable for anaerobic growth, activated by fructose-2,6-bisphosphate and AMP, mutation inhibits glucose induction of cell cycle-related genes	163	PEASAESGLSSKV	15.0073	0	0	510247	11709	16008	eb04473_JV297_phos	eb04473.raw	U	K.PTPPPAPEASAES#GLSS#K.V	2	1	4	1	33.6273	25.8687	27.2742	27.447	53.9168	66.2337	48.144	50.9352	28.5543	54.8074	0.121	0.145489	1.91941	0.000929855
3572	YGL031C	RPL24A	Ribosomal protein L30 of the large (60S) ribosomal subunit, nearly identical to Rpl24Bp and has similarity to rat L24 ribosomal protein; not essential for translation but may be required for normal translation rate	95	LIKERRSLKPEVR	1000	0	0	510246	6174	8545	eb04472_JV297_phos	eb04472.raw	R	R.S#LKPEVR.K	0	0	2	2	96.0302	105.421	174.451	160.369	276.347	271.578	258.916	218.72	134.068	256.39	0.291758	0.102065	1.91239	0.00201795
2012	YER122C	GLO3	ADP-ribosylation factor GTPase activating protein (ARF GAP), involved in ER-Golgi transport; shares functional similarity with Gcs1p	170	STSKENSVDDFFS	42.8692	0	0	510247	21530	28408	eb04473_JV297_phos	eb04473.raw	U	K.ENS#VDDFFSNWQK.P	0	0	1	1	42.5779	34.716	33.7805	34.7662	71.0331	76.4174	62.3077	68.7317	36.4601	69.6224	0.11255	0.0839397	1.90955	8.81178e-05
45	YPL085W	SEC16	COPII vesicle coat protein required for ER transport vesicle budding; Sec16p is bound to the periphery of ER membranes and may act to stabilize initial COPII complexes; interacts with Sec23p, Sec24p and Sec31p	2150	SPISRISGVNLTS	30.6121	0	0	510247	17188	23029	eb04473_JV297_phos	eb04473.raw	U	R.IS#GVNLTSK.K	0	0	2	2	200.222	164.007	135.84	118.702	205.639	382.909	240.423	341.893	154.693	292.716	0.230387	0.284941	1.89224	0.022702
91	YBR279W	PAF1	Component of the Paf1p complex; binds to and modulates the activity of RNA polymerases I and II; required for expression of a subset of genes, including cell cycle-regulated genes; homolog of human PD2/hPAF1; involved in transcription elongation as demonstrated by the G-less-based run-on (GLRO) assay	388	DSKTEGSEQEGEN	22.0108	0	0	510247	5182	7634	eb04473_JV297_phos	eb04473.raw	U	K.TEGS#EQEGENEKDEEIK.Q	0	0	3	3	76.4442	55.9033	60.9193	60.6317	90.5314	110.933	142.911	135.565	63.4746	119.985	0.140954	0.199432	1.89028	0.0044514
487	YHR030C	SLT2	Serine/threonine MAP kinase; involved in regulating maintenance of cell wall integrity, progression through the cell cycle, and nuclear mRNA retention in heat shock; required for mitophagy and pexophagy; affects recruitment of mitochondria to the phagophore assembly site (PAS); regulated by the PKC1-mediated signaling pathway	192	SQFLTEYVATRWY	11.0148	-14	3	510246	21422	27602	eb04472_JV297_phos	eb04472.raw	U	R.GYSENPVENSQFLTEY#VATR.W	0	0	2	2	27.6762	31.581	24.5155	26.5975	55.4739	56.713	45.2247	50.6813	27.5926	52.0232	0.107456	0.100448	1.88541	0.000185723
2341	YPR163C	TIF3	Translation initiation factor eIF-4B, has RNA annealing activity; contains an RNA recognition motif and binds to single-stranded RNA	364	NTYKDRSLTNKKT	4.08456	0	2	510246	1860	3115	eb04472_JV297_phos	eb04472.raw	U	K.DRS#LTNK.K	0	0	1	1	99.4957	100.55	106.723	93.2152	209.787	174.21	180.54	186.041	99.9961	187.645	0.0553173	0.0827801	1.87652	4.08111e-05
3980	YNL035C	YNL035C	Putative protein of unknown function with similarity to proteins containing WD-40 domains; green fluorescent protein (GFP)-fusion protein localizes to the nucleus; YNL035C is not an essential gene	351	DDDREGSINLDEP	1000	0	0	510247	21894	28839	eb04473_JV297_phos	eb04473.raw	U	K.MNVLGDDDREGS#INLDEPLIIQK.E	0	0	1	1	17.5068	16.9267	18.9046	17.0694	31.0254	29.53	36.541	34.6499	17.6019	32.9366	0.0512931	0.0978883	1.8712	9.52969e-05
860	YLR410W	VIP1	Inositol hexakisphosphate (IP6) and inositol heptakisphosphate (IP7) kinase; IP7 production is important for phosphate signaling; involved in cortical actin cytoskeleton function, and invasive pseudohyphal growth analogous to S. pombe asp1	139	DADNINSISKTGS	5.74962	-21	2	510246	20730	26792	eb04472_JV297_phos	eb04472.raw	U	K.SEADPEGLSNSNIVNDADNINS#ISK.T	0	0	2	2	99.0057	82.1507	51.8106	58.7366	127.715	147.358	102.51	167.483	72.9259	136.267	0.297539	0.203641	1.86856	0.0114173
1116	YMR105C	PGM2	Phosphoglucomutase, catalyzes the conversion from glucose-1-phosphate to glucose-6-phosphate, which is a key step in hexose metabolism; functions as the acceptor for a Glc-phosphotransferase	119	GIILTASHNPGGP	20.1669	0	0	510246	17229	22403	eb04472_JV297_phos	eb04472.raw	U	K.CTGGIILTAS#HNPGGPENDM*GIK.Y	0	0	4	4	120.731	111.901	111.803	107.631	119.756	243.043	236.428	242.441	113.017	210.417	0.0487927	0.287593	1.86182	0.0184649
2110	YIR001C	SGN1	Cytoplasmic RNA-binding protein, contains an RNA recognition motif (RRM); may have a role in mRNA translation, as suggested by genetic interactions with genes encoding proteins involved in translational initiation	229	KNIRSTSQKPVVM	7.71046	-2	8	510247	13910	18815	eb04473_JV297_phos	eb04473.raw	U	R.STS#QKPVVMPSDNVK.S	0	0	2	2	63.6457	55.1248	56.3181	51.7441	112.877	110.111	93.8759	105.002	56.7082	105.466	0.0884232	0.0795258	1.85981	5.86097e-05
402	YBL051C	PIN4	Protein involved in G2/M phase progression and response to DNA damage, interacts with Rad53p; contains an RNA recognition motif, a nuclear localization signal, and several SQ/TQ cluster domains; hyperphosphorylated in response to DNA damage	194	RSSSNLSLDSLSK	27.1205	0	0	510246	17657	22940	eb04472_JV297_phos	eb04472.raw	U	R.SSSNLS#LDSLSK.M	2	2	7	3	247.066	230.335	274.678	285.305	577.27	423.246	507.863	411.979	259.346	480.089	0.0970714	0.161728	1.85115	0.00165006
2306	YJL155C	FBP26	Fructose-2,6-bisphosphatase, required for glucose metabolism	435	VGELSQSSTKLHQ	6.59058	-9	2	510246	5965	8278	eb04472_JV297_phos	eb04472.raw	U	K.GTSQVGELSQS#STK.L	0	0	1	1	30.1976	28.8669	29.3978	26.4406	62.0392	59.6567	41.6127	48.3237	28.7257	52.9081	0.056348	0.181789	1.84183	0.00255539
2031	YDR169C	STB3	Ribosomal RNA processing element (RRPE)-binding protein involved in the glucose-induced transition from quiescence to growth; restricted to nucleus in quiescent cells, released into cytoplasm after glucose repletion; binds Sin3p	9	ENQKEVSPPQAIS	62.6585	0	0	510246	16910	22006	eb04472_JV297_phos	eb04472.raw	U	K.EVS#PPQAISVK.S	0	0	1	1	84.9048	87.5264	67.3111	83.4519	201.096	146.417	113.433	133.691	80.7985	148.659	0.113224	0.252279	1.83987	0.0125825
1820	YKR067W	GPT2	Glycerol-3-phosphate/dihydroxyacetone phosphate dual substrate-specific sn-1 acyltransferase located in lipid particles and the ER; involved in the stepwise acylation of glycerol-3-phosphate and dihydroxyacetone in lipid biosynthesis	632	DGYDVSSDAESSI	9.34047	-4	7	510247	4908	7284	eb04473_JV297_phos	eb04473.raw	U	R.DGYDVSS#DAESSISR.M	0	0	3	3	44.6691	53.652	52.9557	61.7427	119.419	84.9966	94.9026	91.4488	53.2549	97.6917	0.130998	0.15411	1.83442	0.00173457
1832	YBL034C	STU1	Component of the mitotic spindle that binds to interpolar microtubules via its association with beta-tubulin (Tub2p); required for interpolar microtubules to provide an outward force on the spindle poles	1001	IISRESSVSFTPI	0	-1	4	510246	16356	21305	eb04472_JV297_phos	eb04472.raw	U	R.ESS#VSFTPIDNKK.S	0	0	1	1	13.1808	8.98408	15.7607	8.4955	20.6023	24.6769	17.1201	22.6446	11.6053	21.2609	0.2997	0.151593	1.832	0.00655708
3858	YDR244W	PEX5	Peroxisomal membrane signal receptor for the C-terminal tripeptide signal sequence (PTS1) of peroxisomal matrix proteins, required for peroxisomal matrix protein import; also proposed to have PTS1-receptor independent functions	232	EKEENVSEVEQNK	48.091	0	0	510247	10969	15071	eb04473_JV297_phos	eb04473.raw	U	K.EENVS#EVEQNKPETVEK.E	0	0	2	2	128.391	112.522	89.2866	115.696	214.18	211.073	162.678	226.555	111.474	203.621	0.146251	0.138015	1.82663	0.00129219
3160	YPL196W	OXR1	Protein of unknown function required for normal levels of resistance to oxidative damage, null mutants are sensitive to hydrogen peroxide; member of a conserved family of proteins found in eukaryotes	178	VPDVNISEKEESE	1000	0	0	510246	17221	22394	eb04472_JV297_phos	eb04472.raw	U	K.VPDVNIS#EK.E	1	1	5	3	191.559	198.849	189.098	198.285	407.142	342.519	346.706	322.634	194.448	354.75	0.0250306	0.10281	1.8244	0.000126311
2820	YGL208W	SIP2	One of three beta subunits of the Snf1 serine/threonine protein kinase complex involved in the response to glucose starvation; null mutants exhibit accelerated aging; N-myristoylprotein localized to the cytoplasm and the plasma membrane	52	KKVTELSLNKCSD	1000	0	0	510247	16042	21554	eb04473_JV297_phos	eb04473.raw	U	K.KVT#ELS#LNK.C	1	1	5	4	254.81	248.083	245.166	245.167	568.962	448.241	400.541	381.21	248.306	449.738	0.0183176	0.187502	1.81122	0.00309291
2008	YPL110C	GDE1	Glycerophosphocholine (GroPCho) phosphodiesterase; hydrolyzes GroPCho to choline and glycerolphosphate, for use as a phosphate source and as a precursor for phosphocholine synthesis; may interact with ribosomes	256	RVMRSTSPNANAN	17.0091	0	0	510246	14279	18731	eb04472_JV297_phos	eb04472.raw	U	R.STS#PNANANDNTEFFK.I	0	0	2	2	18.4867	26.7629	22.8499	23.892	43.4007	44.4608	38.4336	40.1872	22.9979	41.6206	0.149256	0.0671702	1.80976	0.000153698
3776	YNL272C	SEC2	Guanyl-nucleotide exchange factor for the small G-protein Sec4p; essential for post-Golgi vesicle transport and for autophagy; associates with the exocyst, via exocyst subunit Sec15p, on secretory vesicles	515	PLVEDDSDEDQND	1000	0	0	510247	20348	27010	eb04473_JV297_phos	eb04473.raw	U	K.IGPLVEDDS#DEDQNDAIS#VR.L	1	1	2	1	9.4883	9.39436	11.4094	7.82893	17.9878	14.9838	15.2398	20.7464	9.53024	17.2395	0.153806	0.156887	1.80892	0.00242327
3096	YOR070C	GYP1	Cis-golgi GTPase-activating protein (GAP) for the Rab family members Ypt1p (in vivo) and for Ypt1p, Sec4p, Ypt7p, and Ypt51p (in vitro); involved in vesicle docking and fusion	546	PTKDFQSPTTALS	4.41572	0	17	510247	17335	23217	eb04473_JV297_phos	eb04473.raw	U	K.DFQS#PTTALSNM*TPNNAVEDSGK.M	0	0	3	1	9.26125	9.51008	6.61035	8.57392	15.2919	17.5297	14.51	14.0849	8.4889	15.3541	0.154726	0.0999165	1.80873	0.000495925
2823	YGL208W	SIP2	One of three beta subunits of the Snf1 serine/threonine protein kinase complex involved in the response to glucose starvation; null mutants exhibit accelerated aging; N-myristoylprotein localized to the cytoplasm and the plasma membrane	273	PPTSDRSSIALQI	0	0	1	510246	20181	26131	eb04472_JV297_phos	eb04472.raw	U	R.S#SIALQIGK.D	0	0	2	2	109.856	99.2352	91.3373	74.0938	173.336	184.513	131.53	187.903	93.6307	169.32	0.160989	0.153265	1.80839	0.0023472
792	YLR220W	CCC1	Putative vacuolar Fe2+/Mn2+ transporter; suppresses respiratory deficit of yfh1 mutants, which lack the ortholog of mammalian frataxin, by preventing mitochondrial iron accumulation	71	LENSPMSVGKDNR	47.8439	0	0	510246	11568	15358	eb04472_JV297_phos	eb04472.raw	U	R.NSAQDLENS#PMS#VGK.D	1	1	3	1	26.1586	20.8927	20.7992	18.2588	35.7315	44.5271	40.0046	35.3995	21.5273	38.9157	0.154216	0.110202	1.80773	0.000678674
2065	YJR059W	PTK2	Putative serine/threonine protein kinase involved in regulation of ion transport across plasma membrane; enhances spermine uptake	752	QLDKRMSDLSLKS	45.026	0	0	510247	13451	18226	eb04473_JV297_phos	eb04473.raw	U	K.RMS#DLSLK.S	0	0	1	1	129.932	124.736	152.111	161.323	304.212	258.411	294.888	167.761	142.025	256.318	0.123254	0.242894	1.80473	0.0123004
249	YGR270W	YTA7	Protein that localizes to chromatin and has a role in regulation of histone gene expression; has a bromodomain-like region that interacts with the N-terminal tail of histone H3, and an ATPase domain; potentially phosphorylated by Cdc28p	1301	VEKRERSPIPKEV	1000	0	0	510246	3102	4693	eb04472_JV297_phos	eb04472.raw	U	R.ERS#PIPK.E	0	0	3	3	214.06	223.603	203.797	187.123	394.487	366.944	327.916	403.189	207.146	373.134	0.0753444	0.0907811	1.80131	0.000112032
2452	YAL051W	OAF1	Oleate-activated transcription factor, acts alone and as a heterodimer with Pip2p; activates genes involved in beta-oxidation of fatty acids and peroxisome organization and biogenesis	982	PLAGGGSKEQTPI	1000	0	0	510247	4512	6770	eb04473_JV297_phos	eb04473.raw	U	R.QGPLAGGGS#K.E	0	0	1	1	21.4025	24.2696	24.7237	24.3494	36.4403	47.0465	37.5924	49.1217	23.6863	42.5502	0.0648219	0.151891	1.79641	0.001284
1064	YGL244W	RTF1	Subunit of the RNA polymerase II-associated Paf1 complex; directly or indirectly regulates DNA-binding properties of Spt15p and relative activities of different TATA elements; involved in telomere maintenance; involved in transcription elongation as demonstrated by the G-less-based run-on (GLRO) assay	90	GKYKDESDREHLE	0.905121	-4	7	510246	6132	8490	eb04472_JV297_phos	eb04472.raw	U	K.YKDES#DREHLESLPEM*ER.E	0	0	1	1	27.8196	21.2399	25.3692	27.1595	42.8429	38.4673	50.1851	50.6571	25.397	45.5381	0.116489	0.129952	1.79305	0.000893058
3708	YDL022W	GPD1	NAD-dependent glycerol-3-phosphate dehydrogenase, key enzyme of glycerol synthesis, essential for growth under osmotic stress; expression regulated by high-osmolarity glycerol response pathway; homolog of Gpd2p	27	RSSSSVSLKAAEK	17.0091	0	0	510246	5909	8208	eb04472_JV297_phos	eb04472.raw	U	R.SSSSVS#LK.A	1	1	12	10	424.225	402.674	439.011	436.42	780.701	730.971	721.542	796.864	425.582	757.52	0.0389518	0.0487102	1.77996	3.26048e-06
3294	YGR159C	NSR1	Nucleolar protein that binds nuclear localization sequences, required for pre-rRNA processing and ribosome biogenesis	143	NDKKRKSEDAEEE	10.1214	0	12	510247	1267	2488	eb04473_JV297_phos	eb04473.raw	U	K.RKS#EDAEEEEDEESSNK.K	0	0	1	1	18.881	13.3078	19.1336	17.6968	24.2626	30.1532	33.1392	35.194	17.2548	30.6873	0.156759	0.155013	1.77848	0.00268533
3676	YBL088C	TEL1	Protein kinase primarily involved in telomere length regulation; contributes to cell cycle checkpoint control in response to DNA damage; functionally redundant with Mec1p; homolog of human ataxia telangiectasia (ATM) gene	1876	TPKVVDSKAKGLY	1000	0	0	510246	21639	27852	eb04472_JV297_phos	eb04472.raw	U	K.VVDS#KAK.G	0	0	2	2	644.679	628.286	897.477	894.524	1507.44	1447.55	1402.08	1081.97	766.241	1359.76	0.195744	0.139843	1.77458	0.00270725
1577	YBL066C	SEF1	Putative transcription factor, has homolog in Kluyveromyces lactis	273	TPNGPFSPIQKTY	18.9783	0	0	510247	13244	17961	eb04473_JV297_phos	eb04473.raw	U	K.NNSAGNTPNGPFS#PIQK.T	1	1	2	1	32.0021	37.0094	26.7641	30.9498	70.1964	62.2159	34.537	57.6089	31.6813	56.1396	0.132927	0.272744	1.77201	0.021654
1118	YPR104C	FHL1	Regulator of ribosomal protein transcription; has forkhead associated domain that binds phosphorylated proteins; also has forkhead DNA-binding domain but does not bind DNA in vitro; suppresses RNA pol III and splicing factor prp4 mutants	165	EDEREKTQDNTAA	6.03896	0	4	510246	3424	5101	eb04472_JV297_phos	eb04472.raw	U	R.EKT#QDNTAAVK.T	0	0	1	1	21.5459	17.116	17.0724	24.1403	31.4437	39.8728	29.7251	40.4531	19.9686	35.3737	0.174476	0.157732	1.77146	0.00338249
1519	YLR257W	YLR257W	Putative protein of unknown function	198	LAKGESYQSAEQE	7.71046	-1	0	510247	11131	15274	eb04473_JV297_phos	eb04473.raw	U	K.GESY#QS#AEQEIDHTAPEK.S	1	1	2	1	30.6996	33.7692	34.8631	42.2814	48.4786	62.985	56.7536	82.1999	35.4033	62.6043	0.138757	0.229242	1.76832	0.0115539
2832	YOR204W	DED1	ATP-dependent DEAD (Asp-Glu-Ala-Asp)-box RNA helicase, required for translation initiation of all yeast mRNAs; mutations in human DEAD-box DBY are a frequent cause of male infertility	369	SVGRVGSTSENIT	0	0	6	510247	6941	9960	eb04473_JV297_phos	eb04473.raw	U	R.VGS#TSENITQK.V	0	0	1	1	22.717	27.2258	27.5449	25.4996	50.547	39.9259	48.6388	42.0248	25.7468	45.2841	0.0858628	0.112807	1.75883	0.000416973
3128	YKL171W	NNK1	Protein kinase; implicated in proteasome function; interacts with TORC1, Ure2 and Gdh2; overexpression leads to hypersensitivity to rapamycin and nuclear accumulation of Gln3; epitope-tagged protein localizes to the cytoplasm	737	NLEPEPSKYIGSL	110.807	0	0	510247	15270	20562	eb04473_JV297_phos	eb04473.raw	U	K.TTDFSNLEPEPS#K.Y	0	0	1	1	44.1911	50.5486	39.4123	53.2341	92.3674	77.4914	72.2655	87.3382	46.8465	82.3656	0.133209	0.110949	1.7582	0.000674579
3157	YKL104C	GFA1	Glutamine-fructose-6-phosphate amidotransferase, catalyzes the formation of glucosamine-6-P and glutamate from fructose-6-P and glutamine in the first step of chitin biosynthesis	332	RREVGASMTRSIQ	17.0091	0	0	510246	2203	3543	eb04472_JV297_phos	eb04472.raw	U	R.EVGAS#MTR.S	0	0	2	2	163.631	169.519	183.32	165.95	325.767	311.743	262.863	299.022	170.605	299.848	0.0516737	0.0899398	1.75756	9.82738e-05
2974	YOR316C	COT1	Vacuolar transporter that mediates zinc transport into the vacuole; overexpression confers resistance to cobalt and rhodium	211	LTPENASKTPSYS	30.6121	0	0	510246	14215	18653	eb04472_JV297_phos	eb04472.raw	U	R.LLTPENAS#K.T	0	0	2	2	210.631	196.103	149.831	135.758	282.575	325.135	247.412	361.6	173.081	304.181	0.207609	0.163557	1.75745	0.00524923
1537	YNL059C	ARP5	Nuclear actin-related protein involved in chromatin remodeling, component of chromatin-remodeling enzyme complexes	24	DPPLRQTPEPFDE	12.2361	0	23	510246	23198	29685	eb04472_JV297_phos	eb04472.raw	U	K.AVVIDDPPLRQT#PEPFDEQSAYNPQSPIAIDFGSSK.L	0	0	1	1	28.1184	33.2853	29.8351	28.2181	60.7494	48.5581	51.2365	49.2909	29.8642	52.4587	0.0807863	0.107541	1.75658	0.000321014
2711	YJL050W	MTR4	ATP-dependent 3'-5' RNA helicase of the Dead-box family, involved in nuclear RNA processing and degradation both as a component of the TRAMP complex and in TRAMP independent processes; has a KOW domain that shows RNA binding activity	34	DTNVGDTPDHTQD	15.3812	0	0	510246	1517	2666	eb04472_JV297_phos	eb04472.raw	U	K.NADTNVGDT#PDHTQDK.K	0	0	1	1	73.5284	59.7431	57.8067	61.1937	108.949	110.668	101.954	121.541	63.068	110.778	0.11274	0.073163	1.75648	0.000115709
2982	YGL076C	RPL7A	Protein component of the large (60S) ribosomal subunit, nearly identical to Rpl7Bp and has similarity to E. coli L30 and rat L7 ribosomal proteins; contains a conserved C-terminal Nucleic acid Binding Domain (NDB2)	8	AAEKILTPESQLK	1000	0	0	510246	20138	26079	eb04472_JV297_phos	eb04472.raw	R	K.ILT#PES#QLK.K	1	1	7	3	122.356	126.398	142.732	129.877	254.885	214.348	213.481	231.524	130.34	228.559	0.0676213	0.0849561	1.75356	9.23087e-05
1923	YMR196W	YMR196W	Putative protein of unknown function; green fluorescent protein (GFP)-fusion protein localizes to the cytoplasm; YMR196W is not an essential gene	1013	GTHSGLTPQSSIS	57.7111	0	0	510247	12089	16490	eb04473_JV297_phos	eb04473.raw	U	R.IGGTHSGLT#PQSSISSDK.A	2	2	6	3	50.668	55.0932	58.0149	46.8298	103.302	89.147	87.6538	88.1724	52.6515	92.0687	0.0934032	0.0816156	1.74864	0.000121127
3302	YNL088W	TOP2	Topoisomerase II, relieves torsional strain in DNA by cleaving and re-sealing the phosphodiester backbone of both positively and negatively supercoiled DNA; cleaves complementary strands; localizes to axial cores in meiosis	1310	GSTSATSKENTPE	0	-5	0	510246	969	1960	eb04472_JV297_phos	eb04472.raw	U	K.M*GSTSATS#K.E	0	0	2	2	89.2187	88.7152	87.0692	97.0317	152.28	163.39	145.088	171.823	90.5087	158.145	0.0491055	0.0747726	1.74729	3.9157e-05
3391	YOL036W	YOL036W	Protein of unknown function; potential Cdc28p substrate	424	PFLRRASSALLRK	9.34047	0	1	510246	6456	8897	eb04472_JV297_phos	eb04472.raw	U	R.AS#SALLR.K	0	0	2	2	115.975	105.158	83.6339	79.1781	186.652	176.875	148.762	156.3	95.9862	167.147	0.182318	0.105381	1.74137	0.00122425
2539	YOL138C	RTC1	Subunit of the SEA (Seh1-associated) complex, a coatomer-related complex that associates dynamically with the vacuole; null mutation suppresses cdc13-1 temperature sensitivity; has N-terminal WD-40 repeats and a C-terminal RING motif	1133	APSRPDSIGREQL	11.7212	-4	0	510246	757	1665	eb04472_JV297_phos	eb04472.raw	U	R.HAPSRPDS#IGR.E	0	0	1	1	38.2639	45.6147	41.8482	46.1632	76.1226	78.9633	64.5219	79.5522	42.9725	74.79	0.0856044	0.0936922	1.74042	0.000197819
3291	YNL115C	YNL115C	Putative protein of unknown function; green fluorescent protein (GFP)-fusion protein localizes to mitochondria; YNL115C is not an essential gene	251	PTPTHRSQLVQNK	1000	0	0	510246	6183	8556	eb04472_JV297_phos	eb04472.raw	U	R.S#QLVQNK.H	0	0	1	1	65.4023	85.6012	70.4132	63.2327	124.671	119.618	121.981	128.795	71.1624	123.766	0.141713	0.0318091	1.73921	6.81587e-05
1819	YKR067W	GPT2	Glycerol-3-phosphate/dihydroxyacetone phosphate dual substrate-specific sn-1 acyltransferase located in lipid particles and the ER; involved in the stepwise acylation of glycerol-3-phosphate and dihydroxyacetone in lipid biosynthesis	671	RVNSRGSLTDIPI	11.0148	0	8	510246	23394	29916	eb04472_JV297_phos	eb04472.raw	U	R.GS#LTDIPIFSDAK.Q	0	0	1	1	54.7908	67.086	58.6916	57.5603	114.538	105.563	93.1585	98.062	59.5322	102.83	0.0889572	0.0906762	1.72731	0.000193111
1861	YML123C	PHO84	High-affinity inorganic phosphate (Pi) transporter and low-affinity manganese transporter; regulated by Pho4p and Spt7p; mutation confers resistance to arsenate; exit from the ER during maturation requires Pho86p	581	IESSSPSQLQHEA	20.1669	0	0	510246	6325	8731	eb04472_JV297_phos	eb04472.raw	U	K.NNDIESSSPS#QLQHEA.-	1	0	3	2	35.2764	35.2525	32.4896	39.2623	60.0986	67.3873	51.954	65.951	35.5702	61.3477	0.0783632	0.114285	1.72469	0.000482584
4045	YJL129C	TRK1	Component of the Trk1p-Trk2p potassium transport system; 180 kDa high affinity potassium transporter; phosphorylated in vivo and interacts physically with the phosphatase Ppz1p, suggesting Trk1p acitivy is regulated by phosphorylation	450	ISKRVSTFDDLNP	0	-1	0	510247	17177	23015	eb04473_JV297_phos	eb04473.raw	U	R.VST#FDDLNPK.S	0	0	1	1	64.7332	68.3484	65.8745	92.1304	211.972	88.9879	124.492	75.5988	72.7716	125.263	0.178556	0.489988	1.72131	0.145284
2836	YGL181W	GTS1	Protein involved in Arf3p regulation and in transcription regulation; localizes to the nucleus and to endocytic patches; contains an N-terminal Zn-finger and ArfGAP homology domain, a C-terminal glutamine-rich region, and a UBA (ubiquitin associated) domain; gts1 mutations affect budding, cell size, heat tolerance, sporulation, life span, ultradian rhythms, endocytosis; expression oscillates in a…	153	DDFDGESDRFDER	1000	0	0	510246	9075	12219	eb04472_JV297_phos	eb04472.raw	U	R.MDDFDGES#DRFDER.N	0	0	1	1	23.5654	27.0259	22.902	27.4862	54.5094	40.3237	41.4024	37.5515	25.2449	43.4468	0.0929132	0.173807	1.72101	0.00367717
3309	YJL084C	ALY2	Alpha arrestin that controls nutrient-mediated intracellular sorting of permease Gap1p; interacts with AP-1 subunit Apl4p; phosphorylated by Npr1p and also by cyclin-CDK complex Pcl7p-Pho85p; promotes endocytosis of plasma membrane proteins	740	KNSDKNSSETLNK	6.59058	-4	3	510246	3466	5151	eb04472_JV297_phos	eb04472.raw	U	K.NSDKNS#SETLNK.K	0	0	2	2	105.961	88.0314	100.321	94.1563	171.837	180.641	167.502	148.308	97.1174	167.072	0.0797126	0.0817103	1.72031	0.000111056
2695	YER132C	PMD1	Protein with an N-terminal kelch-like domain, putative negative regulator of early meiotic gene expression; required, with Mds3p, for growth under alkaline conditions	1620	TLSRQHSDVATPL	27.1205	0	0	510247	5096	7521	eb04473_JV297_phos	eb04473.raw	U	R.QHS#DVATPLK.Q	0	0	1	1	47.8956	40.1969	46.5119	44.5033	83.8151	78.9766	71.4368	73.8215	44.7769	77.0125	0.0749485	0.0716737	1.71991	5.85783e-05
2149	YER155C	BEM2	Rho GTPase activating protein (RhoGAP) involved in the control of cytoskeleton organization and cellular morphogenesis; required for bud emergence	177	PPQSRCSTGTTLE	9.34047	0	4	510246	5518	7720	eb04472_JV297_phos	eb04472.raw	U	R.CS#TGTTLEK.S	0	0	3	3	183.6	116.688	168.444	135.484	186.826	298.774	276.358	273.101	151.054	258.765	0.201711	0.190514	1.71306	0.00988609
361	YKR028W	SAP190	Protein that forms a complex with the Sit4p protein phosphatase and is required for its function; member of a family of similar proteins including Sap4p, Sap155p, and Sap185p	867	KSKSAESEFTDKI	7.97117	0	3	510246	9169	12335	eb04472_JV297_phos	eb04472.raw	U	K.S#AES#EFTDK.I	1	1	3	2	73.4089	79.5628	76.8154	88.314	163.029	132.985	123.415	125.458	79.5252	136.222	0.0801879	0.134626	1.71294	0.0011108
3647	YDR074W	TPS2	Phosphatase subunit of the trehalose-6-phosphate synthase/phosphatase complex, which synthesizes the storage carbohydrate trehalose; expression is induced by stress conditions and repressed by the Ras-cAMP pathway	890	VMKRSASYTGAKV	9.34047	-2	2	510246	2303	3669	eb04472_JV297_phos	eb04472.raw	U	R.SAS#YTGAK.V	0	0	3	3	181.592	188.729	172.056	180.105	308.941	316.636	285.462	324.822	180.621	308.965	0.0378614	0.0548842	1.71058	8.14942e-06
800	YJL123C	MTC1	Protein of unknown function that may interact with ribosomes; green fluorescent protein (GFP)-fusion protein localizes to the cytoplasm and to COPI-coated vesicles (early Golgi); mtc1 is synthetically lethal with cdc13-1	266	PNNNGITPVEKKP	1000	0	0	510246	22137	28435	eb04472_JV297_phos	eb04472.raw	U	R.IFVDEWGHPNNNGIT#PVEK.K	0	0	2	2	54.9461	68.3064	69.341	66.278	121.696	97.4477	112.839	109.983	64.7179	110.491	0.102562	0.0907242	1.70728	0.000267317
636	YMR291W	TDA1	Putative kinase of unknown function; green fluorescent protein (GFP)-fusion protein localizes to the cytoplasm and nucleus; null mutant is sensitive to expression of the top1-T722A allele; not an essential gene	513	SRSNFNTPKTLSR	1000	0	0	510247	3738	5752	eb04473_JV297_phos	eb04473.raw	U	R.S#NFNT#PK.T	1	1	2	1	75.6316	90.735	95.3452	98.7569	174.718	148.485	140.573	150.375	90.1172	153.538	0.113199	0.0960342	1.70376	0.000399862
4055	YPR125W	YLH47	Mitochondrial inner membrane protein exposed to the mitochondrial matrix, associates with mitochondrial ribosomes, NOT required for respiratory growth; homolog of human Letm1, a protein implicated in Wolf-Hirschhorn syndrome	37	RLRVIPSFNLKFN	1000	0	0	510247	17883	23941	eb04473_JV297_phos	eb04473.raw	U	R.VIPS#FNLK.F	0	0	1	1	83.5903	155.728	128.761	233.025	553.275	72.5189	227.534	170.36	150.276	255.922	0.417111	0.813968	1.70301	0.368918
1529	YNL049C	SFB2	Component of the Sec23p-Sfb2p heterodimer of the COPII vesicle coat, required for cargo selection during vesicle formation in ER to Golgi transport; homologous to Sec24p and Sfb3p	424	EQGILNTPKESSQ	16.1979	0	0	510246	13039	17193	eb04472_JV297_phos	eb04472.raw	U	R.SEQGILNT#PK.E	0	0	2	2	91.1785	110.965	107.868	140.097	358.338	103.229	175.679	129	112.527	191.561	0.180674	0.601146	1.70236	0.225193
803	YJL123C	MTC1	Protein of unknown function that may interact with ribosomes; green fluorescent protein (GFP)-fusion protein localizes to the cytoplasm and to COPI-coated vesicles (early Golgi); mtc1 is synthetically lethal with cdc13-1	273	PVEKKPSVADGEL	29.5335	0	0	510246	10226	13675	eb04472_JV297_phos	eb04472.raw	U	K.KPS#VADGELGNSK.K	0	0	1	1	35.2286	38.6189	34.53	41.445	83.8499	56.302	57.1741	57.2099	37.4556	63.634	0.0855279	0.211897	1.69892	0.00920438
461	YOL041C	NOP12	Nucleolar protein involved in pre-25S rRNA processing and biogenesis of large 60S ribosomal subunit; contains an RNA recognition motif (RRM); binds to Ebp2; similar to Nop13p and Nsr1p	74	DVSDEQTEEVALP	6.03896	-9	0	510246	17516	22766	eb04472_JV297_phos	eb04472.raw	U	K.EASKPDVSDEQT#EEVALPK.V	0	0	1	1	29.3134	25.774	34.4675	30.8583	54.6372	48.4918	52.0901	48.9524	30.1033	51.0429	0.119747	0.0564354	1.69559	0.000100406
2597	YNL079C	TPM1	Major isoform of tropomyosin; binds to and stabilizes actin cables and filaments, which direct polarized cell growth and the distribution of several organelles; acetylated by the NatB complex and acetylated form binds actin most efficiently	67	EAGLSDSKQTEQD	30.8348	0	0	510246	12028	15921	eb04472_JV297_phos	eb04472.raw	U	K.LEAGLSDS#K.Q	0	0	2	2	143.818	156.443	121.027	110.272	258.87	196.858	212.999	231.378	132.89	225.026	0.158234	0.118242	1.69333	0.001612
2106	YOL061W	PRS5	5-phospho-ribosyl-1(alpha)-pyrophosphate synthetase, synthesizes PRPP, which is required for nucleotide, histidine, and tryptophan biosynthesis; one of five related enzymes, which are active as heteromultimeric complexes	127	FESHPGTPVSSSL	15.0073	0	0	510246	20294	26272	eb04472_JV297_phos	eb04472.raw	U	K.ENYTFESHPGT#PVSSSLMTQRPGAESSLK.S	0	0	1	1	52.6876	48.0659	53.7468	50.4371	76.6804	81.9998	79.2298	108.677	51.2343	86.6468	0.0492476	0.171346	1.69119	0.00331582
1536	YNL059C	ARP5	Nuclear actin-related protein involved in chromatin remodeling, component of chromatin-remodeling enzyme complexes	7	MSSRDASLTPLKA	17.0091	0	0	510246	14647	19187	eb04472_JV297_phos	eb04472.raw	U	R.DAS#LTPLK.A	0	0	3	3	252.014	245.695	236.526	220.06	425.594	399.683	379.474	405.692	238.573	402.611	0.0581963	0.0471612	1.68758	8.46634e-06
3963	YJL080C	SCP160	Essential RNA-binding G protein effector of mating response pathway, mainly associated with nuclear envelope and ER, interacts in mRNA-dependent manner with translating ribosomes via multiple KH domains, similar to vertebrate vigilins	50	QLEKKPTPLPSLK	1000	0	0	510247	17210	23057	eb04473_JV297_phos	eb04473.raw	U	K.KPT#PLPS#LK.D	1	1	2	1	150.032	118.666	168.298	136.712	245.844	269.165	245.656	206.884	143.427	241.887	0.146274	0.106721	1.68648	0.00103495
3217	YDR033W	MRH1	Protein that localizes primarily to the plasma membrane, also found at the nuclear envelope; the authentic, non-tagged protein is detected in mitochondria in a phosphorylated state; has similarity to Hsp30p and Yro2p	295	SPRPAATPNLSKD	1000	0	0	510246	8740	11804	eb04472_JV297_phos	eb04472.raw	U	R.PAAT#PNLS#K.D	2	2	10	6	594.883	468.782	591.278	632.941	1062.02	948.859	854.841	981.793	571.971	961.879	0.124706	0.0891333	1.68169	0.00042606
3273	YOR227W	HER1	Protein of unknown function required for proliferation or remodeling of the ER that is caused by overexpression of Hmg2p; may interact with ribosomes, based on co-purification experiments	61	PTKTIASPQRPLS	14.6691	0	0	510247	12850	17458	eb04473_JV297_phos	eb04473.raw	U	K.TIAS#PQRPLSGQNVNNELSNSK.P	0	0	1	1	26.3139	17.5053	26.4934	21.5394	34.2093	40.7612	37.8275	41.5171	22.963	38.5788	0.187319	0.0860401	1.68004	0.00120633
2598	YNL079C	TPM1	Major isoform of tropomyosin; binds to and stabilizes actin cables and filaments, which direct polarized cell growth and the distribution of several organelles; acetylated by the NatB complex and acetylated form binds actin most efficiently	65	KLEAGLSDSKQTE	17.0091	0	0	510247	11021	15138	eb04473_JV297_phos	eb04473.raw	U	K.LEAGLS#DSK.Q	0	0	3	3	253.651	270.206	242.668	254.551	470.517	372.208	396.459	471.655	255.269	427.71	0.0443814	0.119375	1.67553	0.000584368
3890	YMR221C	YMR221C	Putative protein of unknown function; the authentic, non-tagged protein is detected in highly purified mitochondria in high-throughput studies; physical interaction with Atg27p suggests a possible role in autophagy	238	IEGDTGSGIIPDE	11.0148	-2	0	510247	19702	26243	eb04473_JV297_phos	eb04473.raw	U	R.LIEGDTGS#GIIPDEQER.Q	0	0	1	1	14.6746	14.5281	11.5863	17.0302	25.5872	26.5067	21.5609	23.2007	14.4548	24.2139	0.154252	0.0929848	1.67514	0.000840039
2491	YMR102C	YMR102C	Protein of unknown function; transcription is activated by paralogous transcription factors Yrm1p and Yrr1p along with genes involved in multidrug resistance; mutant shows increased resistance to azoles; YMR102C is not an essential gene	643	SSLGYNSKPGSIS	3.92228	-17	0	510246	17765	23075	eb04472_JV297_phos	eb04472.raw	U	R.SNDDGIM*SDVESSLGYNS#K.P	0	0	1	1	10.5757	10.0992	9.38982	5.56782	20.916	10.1969	17.219	11.2558	8.90815	14.8969	0.255897	0.340017	1.67228	0.0744496
3938	YDR035W	ARO3	3-deoxy-D-arabino-heptulosonate-7-phosphate (DAHP) synthase, catalyzes the first step in aromatic amino acid biosynthesis and is feedback-inhibited by phenylalanine or high concentration of tyrosine or tryptophan	26	KGYDPLTPPDLLQ	35.7774	0	0	510247	22212	29223	eb04473_JV297_phos	eb04473.raw	U	K.GYDPLT#PPDLLQHEFPISAK.G	0	0	1	1	15.8099	20.3983	25.6398	25.1597	39.5429	38.6794	31.5806	35.593	21.7519	36.349	0.212124	0.0991173	1.67107	0.00248439
3356	YBR142W	MAK5	Essential nucleolar protein, putative DEAD-box RNA helicase required for maintenance of M1 dsRNA virus; involved in biogenesis of large (60S) ribosomal subunits	688	DISKSNSDTFLLK	11.0148	-2	2	510246	20504	26525	eb04472_JV297_phos	eb04472.raw	U	K.SNS#DTFLLK.N	0	0	1	1	100.045	95.5742	91.0563	82.3802	165.608	164.278	146.857	138.189	92.264	153.733	0.0817461	0.0873622	1.66623	0.00020613
2830	YLL008W	DRS1	Nucleolar DEAD-box protein required for ribosome assembly and function, including synthesis of 60S ribosomal subunits; constituent of 66S pre-ribosomal particles	208	IDEEDDSEEAKAD	1000	0	0	510246	4122	5979	eb04472_JV297_phos	eb04472.raw	U	K.DDEIDEEDDS#EEAK.A	0	0	2	2	61.9966	62.9832	65.354	48.4766	101.384	94.4908	103.797	97.397	59.7026	99.2672	0.127557	0.0416618	1.6627	9.70262e-05
409	YBL051C	PIN4	Protein involved in G2/M phase progression and response to DNA damage, interacts with Rad53p; contains an RNA recognition motif, a nuclear localization signal, and several SQ/TQ cluster domains; hyperphosphorylated in response to DNA damage	189	LEEQHRSSSNLSL	0	0	2	510246	19599	25400	eb04472_JV297_phos	eb04472.raw	U	R.S#SSNLS#LDSLSK.M	1	1	4	1	24.3541	27.857	33.6659	44.0328	56.0781	47.8686	63.4952	48.4205	32.4775	53.9656	0.265036	0.136672	1.66163	0.00905931
2866	YMR275C	BUL1	Ubiquitin-binding component of the Rsp5p E3-ubiquitin ligase complex, functional homolog of Bul2p, disruption causes temperature-sensitive growth, overexpression causes missorting of amino acid permeases	70	SWIRSASATGILG	17.0091	0	0	510246	19171	24833	eb04472_JV297_phos	eb04472.raw	U	R.SAS#ATGILGLR.R	0	0	2	2	182.656	161.356	168.527	154.997	221.14	321.661	266.202	297.801	166.884	276.701	0.0711792	0.15703	1.65804	0.00277776
3372	YJL095W	BCK1	Mitogen-activated protein (MAP) kinase kinase kinase acting in the protein kinase C signaling pathway, which controls cell integrity; upon activation by Pkc1p phosphorylates downstream kinases Mkk1p and Mkk2p	506	TPKISSTTASFKE	0	-2	3	510247	10972	15075	eb04473_JV297_phos	eb04473.raw	U	K.ISST#TASFK.E	0	0	1	1	142.241	146.996	94.3042	95.8554	237.548	174.329	164.954	217.62	119.849	198.613	0.23925	0.17441	1.65719	0.0127783
444	YJL005W	CYR1	Adenylate cyclase, required for cAMP production and cAMP-dependent protein kinase signaling; the cAMP pathway controls a variety of cellular processes, including metabolism, cell cycle, stress response, stationary phase, and sporulation	234	TLRRKVSSLVRGS	6.59058	0	1	510246	8678	11727	eb04472_JV297_phos	eb04472.raw	U	R.KVS#SLVR.G	0	0	1	1	73.3969	50.7695	40.0889	32.4659	113.702	64.4966	86.4168	61.3447	49.1803	81.49	0.362024	0.296932	1.65696	0.0750024
400	YBL051C	PIN4	Protein involved in G2/M phase progression and response to DNA damage, interacts with Rad53p; contains an RNA recognition motif, a nuclear localization signal, and several SQ/TQ cluster domains; hyperphosphorylated in response to DNA damage	653	EQGLNRSLSGLDL	1000	0	0	510246	19470	25231	eb04472_JV297_phos	eb04472.raw	U	R.S#LS#GLDLQNQNK.K	1	1	7	3	205.887	219.479	210.886	191.645	348.705	370.723	299.527	350.163	206.974	342.279	0.0563323	0.0882982	1.65373	0.000159907
1169	YLR371W	ROM2	GDP/GTP exchange factor (GEF) for Rho1p and Rho2p; mutations are synthetically lethal with mutations in rom1, which also encodes a GEF	183	YQKNKSTTAFVPK	0	-1	1	510246	13186	17374	eb04472_JV297_phos	eb04472.raw	U	K.ST#TAFVPK.R	0	0	2	2	90.3778	81.6562	75.8368	64.5789	139.94	122.602	140.041	113.67	78.1125	129.063	0.138541	0.101763	1.65227	0.000974823
37	YJL020C	BBC1	Protein possibly involved in assembly of actin patches; interacts with an actin assembly factor Las17p and with the SH3 domains of Type I myosins Myo3p and Myo5p; localized predominantly to cortical actin patches	634	RNGSINSLTKSIS	24.2431	0	0	510247	7776	11003	eb04473_JV297_phos	eb04473.raw	U	R.NGSINS#LTK.S	1	1	5	3	244.736	202.71	298.996	283.645	405.201	420.461	427.148	448.587	257.522	425.35	0.167327	0.0423419	1.6517	0.000366897
163	YBR068C	BAP2	High-affinity leucine permease, functions as a branched-chain amino acid permease involved in the uptake of leucine, isoleucine and valine; contains 12 predicted transmembrane domains	16	SGKKETSPDSISI	15.0073	0	0	510246	8193	11112	eb04472_JV297_phos	eb04472.raw	U	K.KET#S#PDSISIR.S	1	1	3	1	37.3677	28.9195	27.6385	33.7729	42.7151	59.9882	50.0738	57.9957	31.9246	52.6932	0.140601	0.150136	1.65055	0.0038241
2048	YNL096C	RPS7B	Protein component of the small (40S) ribosomal subunit, nearly identical to Rps7Ap; interacts with Kti11p; deletion causes hypersensitivity to zymocin; has similarity to rat S7 and Xenopus S8 ribosomal proteins	117	KRPRSRTLTAVHD	11.0148	-2	2	510246	2616	4069	eb04472_JV297_phos	eb04472.raw	R	R.SRT#LTAVHDK.V	0	0	1	1	56.7745	56.6397	53.7885	49.6921	101.175	65.2525	78.8588	112.449	54.2237	89.4339	0.0612284	0.238433	1.64935	0.0171821
69	YGR086C	PIL1	Primary component of eisosomes, which are large immobile cell cortex structures associated with endocytosis; null mutants show activation of Pkc1p/Ypk1p stress resistance pathways; detected in phosphorylated state in mitochondria; member of the BAR domain family	278	LSFKQDYEDFEPE	6.9103	-7	0	510246	21590	27797	eb04472_JV297_phos	eb04472.raw	U	K.PTLSFKQDY#EDFEPEEGEEEEEEDGQGR.W	0	0	2	2	74.9026	60.4479	52.2582	56.2271	123.242	89.452	91.2535	97.1552	60.959	100.276	0.162059	0.156172	1.64497	0.00539907
1563	YKL126W	YPK1	Serine/threonine protein kinase that phosphorylates and downregulates flippase activator Fpk1p; mutations affect receptor-mediated endocytosis and sphingolipid-mediated and cell integrity signaling pathways; homolog of mammalian kinase SGK	71	VVPVRVSYDASSS	17.0091	0	0	510246	18221	23641	eb04472_JV297_phos	eb04472.raw	U	K.GTINPSNSSVVPVRVS#YDASSSTSTVR.D	0	0	3	3	150.152	151.499	140.785	129.236	194.612	257.682	195.842	292.167	142.918	235.076	0.0720043	0.204707	1.64483	0.00956011
3718	YJL098W	SAP185	Protein that forms a complex with the Sit4p protein phosphatase and is required for its function; member of a family of similar proteins including Sap4p, Sap155p, and Sap190p	906	PLKLKRSFTDACK	6.59058	0	2	510247	5438	7971	eb04473_JV297_phos	eb04473.raw	U	R.S#FTDACK.S	0	0	2	2	89.6489	69.1059	72.0164	71.2707	92.8787	151.151	116.513	134.9	75.5105	123.861	0.125891	0.202135	1.64031	0.0112196
3188	YPL127C	HHO1	Histone H1, a linker histone required for nucleosome packaging at restricted sites; suppresses DNA repair involving homologous recombination; not required for telomeric silencing, basal transcriptional repression, or efficient sporulation	174	TAKKASSPSSLTY	17.0091	0	0	510247	7715	10923	eb04473_JV297_phos	eb04473.raw	U	K.ASS#PSSLTYK.E	0	0	3	3	337.743	314.411	368.868	358.157	558.225	548.951	566.917	586.039	344.795	565.033	0.0696662	0.0279789	1.63875	4.89049e-06
4003	YHL034C	SBP1	Putative RNA binding protein; involved in translational repression and found in cytoplasmic P bodies; found associated with small nucleolar RNAs snR10 and snR11	289	IEQETGSEEKQEx	0	-21	0	510247	20641	27353	eb04473_JV297_phos	eb04473.raw	U	R.ELTVDVAVIRPENDEEEIEQETGS#EEK.Q	0	0	1	1	25.3221	25.7424	21.226	23.3561	18.9406	51.6742	39.1139	46.9938	23.9116	39.1806	0.0865948	0.36892	1.63856	0.0814463
1860	YML123C	PHO84	High-affinity inorganic phosphate (Pi) transporter and low-affinity manganese transporter; regulated by Pho4p and Spt7p; mutation confers resistance to arsenate; exit from the ER during maturation requires Pho86p	303	KKIHDTSDEDMAI	1000	0	0	510246	14978	19600	eb04472_JV297_phos	eb04472.raw	U	K.IHDT#S#DEDMAINGLER.A	1	1	3	1	26.7322	35.242	26.9411	31.8647	39.3686	55.8776	51.1252	50.4516	30.195	49.2057	0.136334	0.142028	1.6296	0.00336884
2973	YOR316C	COT1	Vacuolar transporter that mediates zinc transport into the vacuole; overexpression confers resistance to cobalt and rhodium	206	ENTRLLTPENASK	39.6629	0	0	510246	12621	16678	eb04472_JV297_phos	eb04472.raw	U	R.LLT#PENASK.T	0	0	1	1	57.2644	50.9378	59.5244	63.2457	105.672	96.4267	93.1337	81.0755	57.7431	94.0771	0.0894261	0.108035	1.62924	0.000700525
758	YKR018C	YKR018C	Putative protein of unknown function; green fluorescent protein (GFP)-fusion protein localizes to the cytoplasm and nucleus	380	SSNSEDSEDEEMD	28.9337	0	0	510247	14458	19523	eb04473_JV297_phos	eb04473.raw	U	K.DSSNSEDS#EDEEMDGPTLLHPGK.I	1	1	21	18	294.424	306.132	296.664	291.526	513.836	479.124	437.218	503.355	297.187	483.383	0.0212781	0.0704154	1.62653	3.81581e-05
1771	YFL034W	YFL034W	Putative integral membrane protein that interacts with Rpp0p, which is a component of the ribosomal stalk	435	TPKAKQSPLSSDV	7.97117	0	4	510246	10323	13795	eb04472_JV297_phos	eb04472.raw	U	K.AKQS#PLSSDVPGK.V	0	0	1	1	11.1015	17.8209	9.93114	12.9001	19.1846	23.6824	20.3734	20.6497	12.9384	20.9725	0.268694	0.0913153	1.62095	0.00673868
2083	YLR429W	CRN1	Coronin, cortical actin cytoskeletal component that associates with the Arp2p/Arp3p complex to regulate its activity; plays a role in regulation of actin patch assembly	575	EQEKSATPPSSIT	24.2431	0	0	510246	9016	12148	eb04472_JV297_phos	eb04472.raw	U	K.SAT#PPSSITAAK.T	1	1	5	4	161.827	166.9	177.969	163.466	269.305	280.542	269.184	266.826	167.541	271.464	0.0433727	0.0226857	1.62029	6.05086e-07
1930	YDR365C	ESF1	Nucleolar protein involved in pre-rRNA processing; depletion causes severely decreased 18S rRNA levels	86	AENDEDSEVNAKT	1000	0	0	510246	2404	3797	eb04472_JV297_phos	eb04472.raw	U	K.EAENDEDS#EVNAK.T	0	0	2	2	94.0465	87.6106	91.7121	92.2742	151.165	150.289	132.421	158.56	91.4108	148.109	0.0297757	0.0749254	1.62025	6.04827e-05
1918	YNR034W	SOL1	Protein with a possible role in tRNA export; shows similarity to 6-phosphogluconolactonase non-catalytic domains but does not exhibit this enzymatic activity; homologous to Sol2p, Sol3p, and Sol4p	320	YDDENLTExxxxx	71.7529	0	0	510246	13145	17323	eb04472_JV297_phos	eb04472.raw	U	K.FYDDENLT#E.-	0	0	2	2	132.071	123.031	131.281	125.289	216.26	203.09	208.435	199.92	127.918	206.926	0.0347703	0.0345334	1.61765	1.47499e-06
3547	YDR482C	CWC21	Protein involved in RNA splicing by the spliceosome; component of a complex containing Cef1p; interacts genetically with ISY1 and BUD13; may bind RNA; has similarity to S. pombe Cwf21p	121	RMSSLYTPRKARL	9.34047	-4	0	510246	8206	11130	eb04472_JV297_phos	eb04472.raw	U	R.MSSLYT#PR.K	0	0	2	2	77.4958	83.0554	75.2435	78.2109	153.57	114.354	124.257	115.496	78.5014	126.919	0.0418949	0.144262	1.61678	0.00200416
1579	YBL066C	SEF1	Putative transcription factor, has homolog in Kluyveromyces lactis	970	SMKRSVSTPVNHF	0	-2	9	510246	21190	27334	eb04472_JV297_phos	eb04472.raw	U	R.SVS#TPVNHFPASVPGLR.N	0	0	1	1	39.9728	39.955	43.0453	41.445	67.7795	72.1609	62.2335	63.6176	41.1045	66.4479	0.0357692	0.0674059	1.61656	3.82496e-05
3651	YCL054W	SPB1	AdoMet-dependent methyltransferase involved in rRNA processing and 60S ribosomal subunit maturation; methylates G2922 in the tRNA docking site of the large subunit rRNA and in the absence of snR52, U2921; suppressor of PAB1 mutants	765	GLINDDSDKTEKD	2.80603	0	3	510246	10618	14172	eb04472_JV297_phos	eb04472.raw	U	K.AGLINDDS#DKTEK.D	0	0	1	1	21.0081	13.96	10.9513	15.2527	24.2858	23.258	24.0597	27.263	15.293	24.7166	0.275596	0.0709603	1.6162	0.00615691
3631	YPL012W	RRP12	Protein required for export of the ribosomal subunits; associates with the RNA components of the pre-ribosomes; has a role in nuclear import in association with Pse1p; contains HEAT-repeats	1186	RKNGKDSDEFGDD	1000	0	0	510246	5435	7617	eb04472_JV297_phos	eb04472.raw	U	K.NGKDS#DEFGDDDDGEK.D	0	0	1	1	37.4991	40.2285	28.8565	36.217	57.9722	60.0148	51.6448	61.0666	35.7003	57.6746	0.13612	0.0731722	1.61552	0.000484393
1867	YPR148C	YPR148C	Protein of unknown function that may interact with ribosomes, based on co-purification experiments; green fluorescent protein (GFP)-fusion protein localizes to the cytoplasm in a punctate pattern	335	EGAEEESKKEANE	22.5294	0	0	510246	1685	2892	eb04472_JV297_phos	eb04472.raw	U	K.SEGAEEES#KK.E	0	0	1	1	72.1422	53.105	57.255	64.4874	93.7966	111.013	95.4964	98.0136	61.7474	99.5798	0.135636	0.0784928	1.6127	0.000579387
3054	YOR038C	HIR2	Subunit of the HIR complex, a nucleosome assembly complex involved in regulation of histone gene transcription; recruits Swi-Snf complexes to histone gene promoters; promotes heterochromatic gene silencing with Asf1p	460	RKPKEATPSNIAP	11.0148	0	8	510246	6282	8679	eb04472_JV297_phos	eb04472.raw	U	K.EAT#PSNIAPGSK.K	0	0	1	1	51.2775	50.9378	48.6876	46.1632	87.0106	66.1409	84.4129	80.193	49.2665	79.4393	0.0480371	0.117072	1.61244	0.000752961
431	YOR206W	NOC2	Protein that forms a nucleolar complex with Mak21p that binds to 90S and 66S pre-ribosomes, as well as a nuclear complex with Noc3p that binds to 66S pre-ribosomes; both complexes mediate intranuclear transport of ribosomal precursors	70	EVFKDMSVETFFE	23.6238	0	0	510246	22761	29171	eb04472_JV297_phos	eb04472.raw	U	K.DMS#VETFFEK.G	0	0	1	1	80.053	87.5474	83.509	82.8638	115.642	164.066	126.446	132.313	83.4933	134.617	0.0370242	0.154598	1.61231	0.00282374
3357	YHR012W	VPS29	Endosomal protein that is a subunit of the membrane-associated retromer complex essential for endosome-to-Golgi retrograde transport; forms a subcomplex with Vps35p and Vps26p that selects cargo proteins for endosome-to-Golgi retrieval	188	PTKENQSEDDDAK	1000	0	0	510246	976	1971	eb04472_JV297_phos	eb04472.raw	U	K.ENQS#EDDDAK.G	0	0	2	1	46.605	40.8386	49.3434	43.5623	76.5409	66.5917	74.3561	73.0599	45.0873	72.6371	0.0817873	0.0589042	1.61103	6.67149e-05
145	YIR006C	PAN1	Part of actin cytoskeleton-regulatory complex Pan1p-Sla1p-End3p, associates with actin patches on the cell cortex; promotes protein-protein interactions essential for endocytosis; previously thought to be a subunit of poly(A) ribonuclease	570	PLTAQKTGFGNNE	58.4333	0	0	510246	13475	17732	eb04472_JV297_phos	eb04472.raw	U	K.T#GFGNNEIYTK.S	0	0	2	2	148.562	143.377	135.923	166.76	280.1	200.823	203.61	272.509	148.656	239.26	0.0883731	0.17931	1.60949	0.00681274
3851	YGR080W	TWF1	Twinfilin, highly conserved actin monomer-sequestering protein involved in regulation of the cortical actin cytoskeleton, composed of two cofilin-like regions, localizes actin monomers to sites of rapid filament assembly	308	DSLDHGSNPDLPN	39.6629	0	0	510247	7042	10086	eb04473_JV297_phos	eb04473.raw	U	K.EDSLDHGS#NPDLPNK.S	0	0	1	1	35.0254	40.26	35.8833	43.51	67.489	60.8767	57.8174	62.191	38.6697	62.0935	0.10236	0.0650111	1.60574	0.000167309
2009	YLR350W	ORM2	Evolutionarily conserved protein, similar to Orm1p, required for resistance to agents that induce unfolded protein response; Orm1p and Orm2p together control membrane biogenesis by coordinating lipid homeostasis with protein quality control	18	FEESPLTPNVSNL	27.1205	0	0	510246	21726	27955	eb04472_JV297_phos	eb04472.raw	U	K.NESPAFEESPLT#PNVSNLK.P	0	0	1	1	43.976	43.4686	45.2523	50.4502	69.4644	78.0881	70.942	74.4865	45.7868	73.2452	0.0698504	0.0526382	1.5997	3.4212e-05
2929	YPL089C	RLM1	MADS-box transcription factor, component of the protein kinase C-mediated MAP kinase pathway involved in the maintenance of cell integrity; phosphorylated and activated by the MAP-kinase Slt2p	164	AHMKLLSPTALIS	11.0148	0	6	510246	23561	30118	eb04472_JV297_phos	eb04472.raw	U	K.LLS#PTALISK.M	0	0	3	3	344.447	296.916	261.759	260.851	446.406	519.686	453.274	442.349	290.993	465.429	0.135376	0.0783182	1.59945	0.00063113
2976	YLL040C	VPS13	Protein of unknown function; heterooligomeric or homooligomeric complex; peripherally associated with membranes; homologous to human COH1; involved in sporulation, vacuolar protein sorting and protein-Golgi retention	1715	LAVLDPSILGERS	1000	0	0	510246	23468	30007	eb04472_JV297_phos	eb04472.raw	U	K.LAVLDPS#ILGER.S	0	0	3	3	130.446	145.176	143.814	127.027	192.787	247.074	200.097	232.696	136.616	218.164	0.0674978	0.118863	1.59691	0.00102939
680	YHR064C	SSZ1	Hsp70 protein that interacts with Zuo1p (a DnaJ homolog) to form a ribosome-associated complex that binds the ribosome via the Zuo1p subunit; also involved in pleiotropic drug resistance via sequential activation of PDR1 and PDR5; binds ATP	258	PRKNARSLAKLKA	1000	0	0	510246	4775	6792	eb04472_JV297_phos	eb04472.raw	U	K.NARS#LAK.L	0	0	1	1	21.8446	32.7277	27.243	50.6332	96.9921	25.0879	57.4215	31.7846	33.1121	52.8216	0.37742	0.616749	1.59523	0.301723
2067	YJR059W	PTK2	Putative serine/threonine protein kinase involved in regulation of ion transport across plasma membrane; enhances spermine uptake	711	KVEDNLSEDDSTM	18.8054	0	0	510246	6645	9134	eb04472_JV297_phos	eb04472.raw	U	K.VEDNLS#EDDSTM*K.E	0	0	5	5	105.662	113.521	99.9048	112.951	198.969	169.383	171.894	147.728	108.01	171.993	0.0600005	0.122114	1.59239	0.00112894
3394	YDR213W	UPC2	Sterol regulatory element binding protein, induces transcription of sterol biosynthetic genes and of DAN/TIR gene products; Ecm22p homolog; relocates from intracellular membranes to perinuclear foci on sterol depletion	122	TIKKEQTPFNDIQ	29.6669	0	0	510247	19000	25373	eb04473_JV297_phos	eb04473.raw	U	K.KEQT#PFNDIQSAVK.A	0	0	1	1	42.9961	31.5284	30.5325	24.1403	46.6775	56.5406	42.3796	60.1236	32.2993	51.4303	0.242933	0.161197	1.5923	0.0153824
2046	YML017W	PSP2	Asn rich cytoplasmic protein that contains RGG motifs; high-copy suppressor of group II intron-splicing defects of a mutation in MRS2 and of a conditional mutation in POL1 (DNA polymerase alpha); possible role in mitochondrial mRNA splicing	306	TEEESHSATPTPK	4.08456	-8	4	510246	2461	3870	eb04472_JV297_phos	eb04472.raw	U	K.QTPTEEESHS#ATPTPK.P	0	0	1	1	27.0667	21.0084	28.7524	25.5649	48.6646	43.5458	37.2461	33.4893	25.5981	40.7364	0.129904	0.164948	1.59138	0.00681516
3846	YNL047C	SLM2	Phosphoinositide PI4,5P(2) binding protein, forms a complex with Slm1p; acts downstream of Mss4p in a pathway regulating actin cytoskeleton organization in response to stress; phosphorylated by the TORC2 complex	625	TITNTTSSIPETN	0	-6	8	510247	19711	26253	eb04473_JV297_phos	eb04473.raw	U	K.LDNLTITNTTS#SIPETNDSQIQNR.V	0	0	1	1	13.9337	14.6544	17.4367	12.8609	18.3712	30.9223	22.2536	22.161	14.7214	23.427	0.132762	0.226838	1.59136	0.0218016
580	YOR123C	LEO1	Component of the Paf1 complex; which associates with RNA polymerase II and is involved in histone methylation; plays a role in regulating Ty1 transposition; involved in transcription elongation as demonstrated by the G-less-based run-on (GLRO) assay	358	EKEKQESPDAAFE	98.5231	0	0	510246	13864	18217	eb04472_JV297_phos	eb04472.raw	U	K.QES#PDAAFETGFR.K	0	0	6	6	327.932	351.094	328.592	366.914	714.549	422.663	538.107	505.858	343.633	545.294	0.0549703	0.225331	1.58685	0.0175907
3055	YER178W	PDA1	E1 alpha subunit of the pyruvate dehydrogenase (PDH) complex, catalyzes the direct oxidative decarboxylation of pyruvate to acetyl-CoA; phosphorylated; regulated by glucose	313	YRYGGHSMSDPGT	20.1669	0	0	510246	2239	3588	eb04472_JV297_phos	eb04472.raw	U	R.YGGHS#MSDPGTTYR.T	0	0	9	9	294.747	305.154	314.757	318.999	538.018	471.115	466.93	473.444	308.414	487.377	0.0350072	0.0694904	1.58027	5.56923e-05
522	YNL298W	CLA4	Cdc42p-activated signal transducing kinase of the PAK (p21-activated kinase) family, along with Ste20p and Skm1p; involved in septin ring assembly, vacuole inheritance, cytokinesis, sterol uptake regulation; phosphorylates Cdc3p and Cdc10p	425	YSKQPQSPLSSQS	33.6572	0	0	510246	6125	8482	eb04472_JV297_phos	eb04472.raw	U	K.QPQS#PLSSQSTQNQAIPR.Y	0	0	1	1	21.4741	27.4572	15.1153	25.9962	38.1368	36.518	35.1803	32.0506	22.5107	35.4714	0.246516	0.0727665	1.57576	0.00546741
63	YPL085W	SEC16	COPII vesicle coat protein required for ER transport vesicle budding; Sec16p is bound to the periphery of ER membranes and may act to stabilize initial COPII complexes; interacts with Sec23p, Sec24p and Sec31p	1611	DLVRRESIISTGS	3.7006	0	6	510246	21534	27732	eb04472_JV297_phos	eb04472.raw	U	R.RES#IISTGSEFLPPPK.I	0	0	1	1	29.7436	23.4806	29.9912	26.2838	51.1396	39.5811	35.0442	46.3652	27.3748	43.0325	0.113206	0.165714	1.57198	0.0068996
1975	YHR027C	RPN1	Non-ATPase base subunit of the 19S regulatory particle of the 26S proteasome; may participate in the recognition of several ligands of the proteasome; contains a leucine-rich repeat (LRR) domain, a site for protein-protein interactions	177	KDAEDETSSDGSK	9.34047	0	5	510246	1017	2027	eb04472_JV297_phos	eb04472.raw	U	K.DAEDET#SSDGSK.S	0	0	3	2	41.0243	38.9135	43.316	48.6857	69.9873	63.4358	63.5447	72.7939	42.9849	67.4404	0.0978098	0.0697381	1.56893	0.000241992
3386	YIL050W	PCL7	Pho85p cyclin of the Pho80p subfamily, forms a functional kinase complex with Pho85p which phosphorylates Mmr1p and is regulated by Pho81p; involved in glycogen metabolism, expression is cell-cycle regulated	13	SKKTTTSPINIPG	9.34047	-3	0	510246	8601	11630	eb04472_JV297_phos	eb04472.raw	U	K.TTTS#PINIPGGNR.D	0	0	4	4	172.546	181.354	160.782	158.644	245.856	259.153	257.778	291.417	168.332	263.551	0.0630752	0.07404	1.56567	0.000138379
6	YOR171C	LCB4	Sphingoid long-chain base kinase, responsible for synthesis of long-chain base phosphates, which function as signaling molecules, regulates synthesis of ceramide from exogenous long-chain bases, localizes to the Golgi and late endosomes	451	TFEPNPSPNSSPD	7.97117	-6	9	510247	21070	27862	eb04473_JV297_phos	eb04473.raw	U	K.GCLTFEPNPS#PNSSPDLLSK.N	1	1	2	1	49.3894	41.3752	49.8327	45.0131	53.8936	76.8815	88.0249	71.7783	46.4026	72.6446	0.0861051	0.195785	1.56553	0.0120337
715	YDR028C	REG1	Regulatory subunit of type 1 protein phosphatase Glc7p, involved in negative regulation of glucose-repressible genes	349	ESNSSVSLKSQHS	17.0091	0	0	510246	5828	8108	eb04472_JV297_phos	eb04472.raw	U	K.ESNSSVS#LK.S	1	1	4	2	126.144	121.538	140.306	116.571	210.671	199.205	195.867	182.571	126.14	197.078	0.0810305	0.0586788	1.56238	9.34156e-05
3506	YAL010C	MDM10	Subunit of both the ERMES complex that links the ER to mitochondria, and of the mitochondrial sorting and assembly machinery (SAM complex) that functions in import and assembly of outer membrane beta-barrel proteins	457	GFQESLSDDEKND	20.1669	0	0	510247	9749	13533	eb04473_JV297_phos	eb04473.raw	U	R.GFQESLS#DDEK.N	0	0	2	1	51.5523	58.3439	46.1683	50.7247	86.2204	75.1179	80.6895	80.9063	51.6973	80.7335	0.097176	0.0561607	1.56166	0.000137585
3215	YGR185C	TYS1	Cytoplasmic tyrosyl-tRNA synthetase, required for cytoplasmic protein synthesis; interacts with positions 34 and 35 of the tRNATyr anticodon; mutations in human ortholog YARS are associated with Charcot-Marie-Tooth (CMT) neuropathies	359	KGYPVATPQKSKK	44.2778	0	0	510246	7581	10338	eb04472_JV297_phos	eb04472.raw	U	K.GYPVAT#PQK.S	0	0	3	3	185.356	197.345	187.328	180.523	298.402	293.789	272.796	304.958	187.638	292.486	0.0377031	0.0475371	1.55878	1.05026e-05
1011	YIL135C	VHS2	Cytoplasmic protein of unknown function; identified as a high-copy suppressor of the synthetic lethality of a sis2 sit4 double mutant, suggesting a role in G1/S phase progression; similar to Mlf3p	84	RNFHNLSQRSSAV	1000	0	0	510246	1866	3122	eb04472_JV297_phos	eb04472.raw	U	R.NFHNLS#QR.S	1	1	5	3	212.686	233.828	170.943	163.584	349.053	276.259	283.471	303.979	195.26	303.19	0.172052	0.108026	1.55275	0.0036891
3966	YBR150C	TBS1	Putative protein of unknown function; the authentic, non-tagged protein is detected in highly purified mitochondria in high-throughput studies	214	SAGKSASDKEDTW	16.144	0	0	510247	21108	27906	eb04473_JV297_phos	eb04473.raw	U	K.SAS#DKEDTWPDFVPIDR.T	0	0	1	1	38.6463	50.9484	43.1911	43.1833	73.0317	66.7508	62.2087	70.9683	43.9923	68.2399	0.116102	0.0702779	1.55118	0.000450084
2398	YBR267W	REI1	Cytoplasmic pre-60S factor; required for the correct recycling of shuttling factors Alb1, Arx1 and Tif6 at the end of the ribosomal large subunit biogenesis; involved in bud growth in the mitotic signaling network	140	EEPEQLTEEEMAE	1000	0	0	510246	4415	6347	eb04472_JV297_phos	eb04472.raw	U	K.KEEPEQLT#EEEM*AER.V	0	0	4	4	97.4761	97.7729	119.059	112.742	180.865	151.774	150.926	178.062	106.763	165.407	0.101749	0.0983949	1.5493	0.000969554
595	YIR003W	AIM21	Protein of unknown function involved in mitochondrial migration along actin filament; may interact with ribosomes; GFP-fusion protein colocalizes with Sac1p to the actin cytoskeleton	85	PVRRSTTEELNNV	17.0091	0	0	510246	8340	11302	eb04472_JV297_phos	eb04472.raw	U	R.STT#EELNNVM*NNTSK.E	0	0	6	5	188.774	198.923	185.777	176.458	344.521	274.296	314.47	228.283	187.483	290.393	0.0493672	0.173624	1.5489	0.00699788
2393	YPR065W	ROX1	Heme-dependent repressor of hypoxic genes; contains an HMG domain that is responsible for DNA bending activity	178	MVSRSLSGLPLTH	4.08456	-2	5	510246	19545	25329	eb04472_JV297_phos	eb04472.raw	U	R.SLS#GLPLTHDK.T	0	0	3	2	78.7625	65.1504	57.7443	60.0436	116.944	106.067	96.6468	84.896	65.4252	101.138	0.143902	0.134857	1.54586	0.00503867
3061	YBR069C	TAT1	Amino acid transport protein for valine, leucine, isoleucine, and tyrosine, low-affinity tryptophan and histidine transporter; overexpression confers FK506 and FTY720 resistance	84	RNSELESQEKNNL	1000	0	0	510246	7903	10744	eb04472_JV297_phos	eb04472.raw	U	R.QLPPDRNS#ELES#QEK.N	1	1	6	3	284.338	240.708	342.385	319.117	453.285	429.544	460.968	488.823	296.637	458.155	0.149215	0.0533262	1.5445	0.000691719
3297	YDL173W	PAR32	Putative protein of unknown function; hyperphosphorylated upon rapamycin treatment in a Tap42p-dependent manner; green fluorescent protein (GFP)-fusion protein localizes to the cytoplasm; PAR32 is not an essential gene	246	GAGNIISPKSSRN	1000	0	0	510247	9146	12759	eb04473_JV297_phos	eb04473.raw	U	R.GGAGNIIS#PK.S	0	0	1	1	43.8685	44.4365	48.0838	63.3372	87.9402	69.668	74.6282	76.2395	49.9315	77.119	0.182855	0.100328	1.5445	0.00391872
2712	YDR391C	YDR391C	Putative protein of unknown function, possibly involved in zinc homeostasis; Bdf1p-dependent transcription induced by salt stress; green fluorescent protein (GFP)-fusion protein localizes to both the cytoplasm and the nucleus	9	FENKLPTPLENND	1000	0	0	510246	16659	21687	eb04472_JV297_phos	eb04472.raw	U	K.LPT#PLENNDAK.G	0	0	2	2	140.675	147.08	133.644	127.589	206.36	225.884	188.964	226.482	137.247	211.922	0.0616384	0.0846276	1.54409	0.000283907
1919	YNR034W	SOL1	Protein with a possible role in tRNA export; shows similarity to 6-phosphogluconolactonase non-catalytic domains but does not exhibit this enzymatic activity; homologous to Sol2p, Sol3p, and Sol4p	48	TQMSGTSLNGNGN	2.80603	-7	9	510246	4919	6974	eb04472_JV297_phos	eb04472.raw	U	R.STQMSGTS#LNGNGNTESK.T	0	0	1	1	25.7164	27.6045	24.5155	25.2251	43.1451	40.8673	32.6444	42.448	25.7654	39.7762	0.0512877	0.121909	1.54378	0.00141247
2663	YOL093W	TRM10	tRNA methyltransferase, methylates the N-1 position of guanosine in tRNAs	16	EEKVKRTPPLPPV	43.6045	0	0	510246	21514	27707	eb04472_JV297_phos	eb04472.raw	U	R.T#PPLPPVPEGMSK.K	0	0	3	2	67.8282	85.7906	93.3777	92.1174	148.864	130.73	121.399	121.988	84.7785	130.745	0.138923	0.0979798	1.5422	0.00185982
2005	YDL131W	LYS21	Homocitrate synthase isozyme, catalyzes the condensation of acetyl-CoA and alpha-ketoglutarate to form homocitrate, which is the first step in the lysine biosynthesis pathway; highly similar to the other isozyme, Lys20p	409	DFHAELSTPLLKP	6.59058	0	1	510246	21379	27553	eb04472_JV297_phos	eb04472.raw	U	K.DFHAELS#TPLLK.P	0	0	11	8	313.293	289.468	339.533	356.471	516.718	500.963	442.994	539.673	324.691	500.087	0.0906822	0.0824801	1.54019	0.000450012
1871	YCL037C	SRO9	Cytoplasmic RNA-binding protein that associates with translating ribosomes; involved in heme regulation of Hap1p as a component of the HMC complex, also involved in the organization of actin filaments; contains a La motif	148	KKDGFESAVGEED	55.37	0	0	510247	9849	13657	eb04473_JV297_phos	eb04473.raw	U	K.DGFES#AVGEEDSK.D	0	0	3	2	102.71	91.3136	84.5708	110.089	146.842	158.855	129.155	163.215	97.1708	149.517	0.117431	0.101915	1.5387	0.0015157
3839	YDL110C	TMA17	Protein of unknown function that associates with ribosomes; heterozygous deletion demonstrated increases in chromosome instability in a rad9 deletion background; protein abundance is decreased upon intracellular iron depletion	68	RLEADDSDDLENI	19.6069	0	0	510247	21577	28463	eb04473_JV297_phos	eb04473.raw	U	R.LEADDS#DDLENIDSGDLALYK.D	0	0	3	3	56.2487	79.2892	44.8046	50.7377	98.8281	76.3246	82.4832	97.8323	57.7701	88.867	0.261174	0.126256	1.53829	0.0162506
3154	YBL037W	APL3	Alpha-adaptin, large subunit of the clathrin associated protein complex (AP-2); involved in vesicle mediated transport	727	PPSRRNTIDDVNS	45.026	0	0	510247	2254	3797	eb04473_JV297_phos	eb04473.raw	U	R.RNT#IDDVNSK.I	0	0	3	3	162.293	147.059	154.724	160.63	264.262	250.574	252.002	192.038	156.177	239.719	0.0441274	0.135057	1.53492	0.00233896
3338	YOR353C	SOG2	Key component of the RAM signaling network, required for proper cell morphogenesis and cell separation after mitosis	214	DHPNLPTPEPKIS	1000	0	0	510247	7009	10043	eb04473_JV297_phos	eb04473.raw	U	K.DHPNLPT#PEPK.I	0	0	1	1	13.6589	17.2212	15.2506	18.2326	24.8319	21.0967	26.41	26.3683	16.0908	24.6767	0.126784	0.101192	1.53359	0.00178595
2013	YER122C	GLO3	ADP-ribosylation factor GTPase activating protein (ARF GAP), involved in ER-Golgi transport; shares functional similarity with Gcs1p	340	EQQDTLTPKFAKL	20.1669	0	0	510246	4195	6070	eb04472_JV297_phos	eb04472.raw	U	K.EQQDTLT#PK.F	0	0	1	1	106.57	108.44	126.492	114.219	212.437	152.384	189.731	144.318	113.93	174.718	0.0788642	0.183125	1.53355	0.0106012
401	YBL051C	PIN4	Protein involved in G2/M phase progression and response to DNA damage, interacts with Rad53p; contains an RNA recognition motif, a nuclear localization signal, and several SQ/TQ cluster domains; hyperphosphorylated in response to DNA damage	655	GLNRSLSGLDLQN	1000	0	0	510246	19470	25231	eb04472_JV297_phos	eb04472.raw	U	R.S#LS#GLDLQNQNK.K	1	1	6	2	89.7684	114.363	89.526	85.2164	166.12	136.565	127.287	150.182	94.7184	145.038	0.140017	0.116585	1.53126	0.00338483
728	YDL226C	GCS1	ADP-ribosylation factor GTPase activating protein (ARF GAP), involved in ER-Golgi transport; shares functional similarity with Glo3p	157	TPGVAQSREGTPL	14.4608	0	0	510247	5936	8631	eb04473_JV297_phos	eb04473.raw	U	K.LSATSQTAASATPGVAQS#R.E	0	0	2	2	24.9636	29.8032	27.8467	19.2782	40.0077	37.8971	34.4133	43.6449	25.4729	38.9907	0.179928	0.0991585	1.53067	0.00406572
2610	YOR273C	TPO4	Polyamine transport protein, recognizes spermine, putrescine, and spermidine; localizes to the plasma membrane; member of the major facilitator superfamily	614	TQPVPASFDREDG	18.9783	0	0	510246	3732	5483	eb04472_JV297_phos	eb04472.raw	U	R.THTQPVPAS#FDR.E	0	0	1	1	65.7131	59.5011	62.3038	66.5524	129.609	82.8617	97.7972	78.5366	63.5176	97.2013	0.051125	0.237934	1.5303	0.0278905
591	YIR003W	AIM21	Protein of unknown function involved in mitochondrial migration along actin filament; may interact with ribosomes; GFP-fusion protein colocalizes with Sac1p to the actin cytoskeleton	623	KAISEESLSPSEA	44.2778	0	0	510247	14611	19720	eb04473_JV297_phos	eb04473.raw	U	K.AISEES#LSPSEAIANR.D	0	0	2	2	77.0895	74.7972	74.5564	73.3619	120.848	112.577	117.305	107.988	74.9512	114.679	0.0207803	0.048847	1.53005	9.53721e-06
137	YOR220W	RCN2	Protein of unknown function; green fluorescent protein (GFP)-fusion protein localizes to the cytoplasm and is induced in response to the DNA-damaging agent MMS; phosphorylated in response to alpha factor	152	KGGSSLSPDKSSL	17.0091	0	0	510246	3506	5198	eb04472_JV297_phos	eb04472.raw	U	K.GGSSLS#PDK.S	0	0	4	4	383.918	388.335	370.606	332.279	581.906	552.849	530.129	590.778	368.784	563.916	0.0690839	0.0491997	1.52912	4.73061e-05
3448	YGL150C	INO80	ATPase and nucleosome spacing factor, subunit of complex containing actin and actin-related proteins that has chromatin remodeling activity and 3' to 5' DNA helicase activity in vitro; has a role in modulating stress gene transcription	420	DNDEDGSESHKRR	5.08456	0	2	510247	6728	9686	eb04473_JV297_phos	eb04473.raw	U	K.NNVGLDGNDLDNDEDGS#ESHK.R	0	0	2	2	30.114	32.5489	29.9287	28.1005	48.3624	50.9582	39.3861	45.7365	30.173	46.1108	0.0605187	0.107657	1.52821	0.000942606
2884	YHR179W	OYE2	Conserved NADPH oxidoreductase containing flavin mononucleotide (FMN), homologous to Oye3p with different ligand binding and catalytic properties; may be involved in sterol metabolism, oxidative stress response, and programmed cell death	353	YGRFFISNPDLVD	1000	0	0	510246	22614	28999	eb04472_JV297_phos	eb04472.raw	U	R.FFIS#NPDLVDR.L	0	0	1	1	75.4284	75.9649	75.3996	84.8635	122.556	120.998	122.092	110.164	77.9141	118.952	0.0595555	0.0495594	1.52671	3.46234e-05
2337	YHR016C	YSC84	Actin-binding protein involved in bundling of actin filaments and endocytosis of actin cortical patches; activity stimulated by Las17p; contains SH3 domain similar to Rvs167p	301	GYGDFDSEDEDYD	38.1888	0	0	510246	9008	12138	eb04472_JV297_phos	eb04472.raw	U	R.GYGDFDS#EDEDYDYGR.S	0	0	3	3	148.037	154.276	144.064	158.983	240.162	219.042	223.761	241.22	151.34	231.046	0.0436462	0.0489531	1.52667	1.87116e-05
3627	YOR173W	DCS2	Non-essential, stress induced regulatory protein; modulates m7G-oligoribonucleotide metabolism; inhibits Dcs1p; regulated by Msn2p, Msn4p, and the Ras-cAMP-cAPK signaling pathway; mutant has increased aneuploidy tolerance	64	SQSGRSTPIFFHR	24.437	0	0	510247	11141	15288	eb04473_JV297_phos	eb04473.raw	U	R.ST#PIFFHR.E	0	0	3	3	155.78	169.33	176.814	184.797	306.361	248.453	234.931	256.925	171.68	261.667	0.0718703	0.119014	1.52416	0.00170729
1576	YDR361C	BCP1	Essential protein involved in nuclear export of Mss4p, which is a lipid kinase that generates phosphatidylinositol 4,5-biphosphate and plays a role in actin cytoskeleton organization and vesicular transport	209	FDTDDDTDSGKRN	13.3795	0	0	510246	14325	18787	eb04472_JV297_phos	eb04472.raw	U	R.KYEVNFDTDDDT#DSGK.R	0	0	4	4	112.892	108.724	116.936	119.878	184.549	170.179	161.02	182.825	114.607	174.643	0.0423748	0.0636395	1.52384	6.13481e-05
510	YGR250C	YGR250C	Putative RNA binding protein; localizes to stress granules induced by glucose deprivation; interacts with Rbg1p in a two-hybrid	44	KIERKTSTGLQLE	6.59058	-1	15	510246	23350	29864	eb04472_JV297_phos	eb04472.raw	U	R.KTS#TGLQLEQLANTNLLTIR.I	0	0	1	1	37.1406	29.0983	36.1956	32.8449	34.1163	50.7195	47.3771	73.5435	33.8199	51.4391	0.107854	0.31859	1.52097	0.0806001
3131	YKL171W	NNK1	Protein kinase; implicated in proteasome function; interacts with TORC1, Ure2 and Gdh2; overexpression leads to hypersensitivity to rapamycin and nuclear accumulation of Gln3; epitope-tagged protein localizes to the cytoplasm	65	AFNRANSSDTIYF	6.59058	0	5	510246	12760	16847	eb04472_JV297_phos	eb04472.raw	U	R.ANS#SDTIYFRPK.K	0	0	1	1	107.658	128.333	95.4493	95.4371	179.889	159.624	137.431	171.521	106.719	162.116	0.145402	0.113735	1.51909	0.00370189
93	YNL233W	BNI4	Targeting subunit for Glc7p protein phosphatase, localized to the bud neck, required for localization of chitin synthase III to the bud neck via interaction with the chitin synthase III regulatory subunit Skt5p	769	EQPIEVTPRNNAY	1000	0	0	510246	7645	10418	eb04472_JV297_phos	eb04472.raw	U	K.HIEQPIEVT#PR.N	0	0	2	2	81.6782	92.9863	70.9754	75.1133	160.809	95.2996	115.264	115.532	80.1883	121.726	0.119753	0.227763	1.518	0.0299019
421	YOR042W	CUE5	Protein containing a CUE domain that binds ubiquitin, which may facilitate intramolecular monoubiquitination; green fluorescent protein (GFP)-fusion protein localizes to the cytoplasm in a punctate pattern	167	PARRRQTQLEQDE	1000	0	0	510246	7572	10326	eb04472_JV297_phos	eb04472.raw	U	R.RQT#QLEQDELLAR.Q	0	0	2	2	125.499	145.176	142.732	137.287	259.533	197.189	199.689	178.545	137.673	208.739	0.0636327	0.168401	1.51619	0.00777205
2517	YJL042W	MHP1	Microtubule-associated protein involved in assembly and stabilization of microtubules; overproduction results in cell cycle arrest at G2 phase; similar to Drosophila protein MAP and to mammalian MAP4 proteins	577	ELKRIVTNNEEEV	29.6669	0	0	510246	14557	19075	eb04472_JV297_phos	eb04472.raw	U	R.IVT#NNEEEVTVSK.T	0	0	1	1	39.2199	46.3406	40.3596	39.3668	66.1643	60.1739	59.277	64.9717	41.3217	62.6467	0.0818936	0.0547154	1.51607	0.000115387
423	YOR042W	CUE5	Protein containing a CUE domain that binds ubiquitin, which may facilitate intramolecular monoubiquitination; green fluorescent protein (GFP)-fusion protein localizes to the cytoplasm in a punctate pattern	70	DEDEVVTPAEDAK	82.6713	0	0	510246	18307	23748	eb04472_JV297_phos	eb04472.raw	U	K.SSGIDEDEVVT#PAEDAKEEEEEHPPLPAR.R	0	0	4	4	114.35	113.153	127.2	123.42	221.768	170.192	160.563	169.985	119.531	180.627	0.0574482	0.153867	1.51114	0.00527316
2035	YDL223C	HBT1	Substrate of the Hub1p ubiquitin-like protein that localizes to the shmoo tip (mating projection); mutants are defective for mating projection formation, thereby implicating Hbt1p in polarized cell morphogenesis	301	GYSNTDSNSDRDV	4.69102	-5	10	510247	9291	12944	eb04473_JV297_phos	eb04473.raw	U	K.GYSNTDS#NSDRDVIPGSFR.G	0	0	1	1	23.8283	21.5555	24.984	19.7618	36.6611	26.7322	36.9863	35.5688	22.5324	33.9871	0.103513	0.143421	1.50836	0.00544257
2831	YOR204W	DED1	ATP-dependent DEAD (Asp-Glu-Ala-Asp)-box RNA helicase, required for translation initiation of all yeast mRNAs; mutations in human DEAD-box DBY are a frequent cause of male infertility	539	MMSAPGSRSNSRR	11.0148	-4	0	510246	3246	4878	eb04472_JV297_phos	eb04472.raw	U	K.DAMMSAPGS#R.S	0	0	4	3	178.951	152.014	177.126	164.917	284.585	246.663	224.812	257.735	168.252	253.449	0.0742352	0.0980842	1.50636	0.000865623
3277	YOR227W	HER1	Protein of unknown function required for proliferation or remodeling of the ER that is caused by overexpression of Hmg2p; may interact with ribosomes, based on co-purification experiments	1081	ALLFKSSSNTSLA	0	-1	4	510246	3622	5344	eb04472_JV297_phos	eb04472.raw	U	K.SS#SNTSLAGK.R	0	0	2	2	210.929	190.138	184.226	171.831	290.825	299.994	292.452	257.058	189.281	285.082	0.0862431	0.0670169	1.50613	0.000265396
125	YOL116W	MSN1	Transcriptional activator involved in regulation of invertase and glucoamylase expression, invasive growth and pseudohyphal differentiation, iron uptake, chromium accumulation, and response to osmotic stress; localizes to the nucleus	238	PNLQKVSPNHENA	50.7033	0	0	510246	17571	22834	eb04472_JV297_phos	eb04472.raw	U	K.VS#PNHENAVESNAQESVPTFEEEQYETK.T	0	0	3	3	25.0353	31.7388	28.9502	28.6886	45.4342	41.3447	44.9155	40.6224	28.6032	43.0792	0.0961487	0.0568007	1.50609	0.000223603
56	YPL085W	SEC16	COPII vesicle coat protein required for ER transport vesicle budding; Sec16p is bound to the periphery of ER membranes and may act to stabilize initial COPII complexes; interacts with Sec23p, Sec24p and Sec31p	2143	NNSPSPSSPISRI	11.0148	-16	4	510246	4651	6639	eb04472_JV297_phos	eb04472.raw	U	K.TSPSPTGPNPNNSPSPS#SPISR.I	0	0	4	4	56.4398	51.7584	54.8815	55.456	82.2231	81.549	78.8588	86.4677	54.6339	82.2746	0.0370125	0.0382939	1.50593	6.06305e-06
1999	YBL091C	MAP2	Methionine aminopeptidase, catalyzes the cotranslational removal of N-terminal methionine from nascent polypeptides; function is partially redundant with that of Map1p	35	QAKADESDPVESK	51.0043	0	0	510246	3960	5773	eb04472_JV297_phos	eb04472.raw	U	K.ADES#DPVESK.K	0	0	2	2	75.4045	75.5126	73.2552	74.2376	121.499	101.32	118.999	107.081	74.6025	112.225	0.0143117	0.0856663	1.5043	0.000237634
254	YGR270W	YTA7	Protein that localizes to chromatin and has a role in regulation of histone gene expression; has a bromodomain-like region that interacts with the N-terminal tail of histone H3, and an ATPase domain; potentially phosphorylated by Cdc28p	125	PEEDDESFHEEDV	13.7906	0	0	510246	20746	26810	eb04472_JV297_phos	eb04472.raw	U	K.AHDPEEDDES#FHEEDVDDDEEEEEADEFEDEYLDEDSK.D	0	0	2	2	24.9875	28.3093	21.3925	28.0874	40.089	28.562	39.0026	46.5102	25.6942	38.541	0.126253	0.19283	1.49999	0.0193549
3313	YJR118C	ILM1	Protein of unknown function; may be involved in mitochondrial DNA maintenance; required for slowed DNA synthesis-induced filamentous growth	199	EKGNDDSDAKKxx	1000	0	0	510246	1433	2564	eb04472_JV297_phos	eb04472.raw	U	K.GNDDS#DAKK.-	0	0	1	1	95.5044	91.5135	85.4973	76.6294	114.806	125.082	134.388	149.179	87.2862	130.863	0.09405	0.111538	1.49925	0.00200631
3182	YBR079C	RPG1	eIF3a subunit of the core complex of translation initiation factor 3 (eIF3), essential for translation; part of a Prt1p-Rpg1p-Nip1p subcomplex that stimulates binding of mRNA and tRNA(i)Met to ribosomes; involved in translation reinitiation	513	VSEEENTEPEVQE	30.6121	0	0	510246	5531	7735	eb04472_JV297_phos	eb04472.raw	U	K.EVSEEENT#EPEVQEEK.E	0	0	1	1	36.6029	42.5744	42.3687	37.7331	70.8355	55.3605	64.3859	48.1666	39.8198	59.6871	0.0777941	0.166927	1.49893	0.00888177
2362	YFL042C	YFL042C	Putative protein of unknown function; YFL042C is not an essential gene	165	EVKTRLTPSQMKE	20.1669	0	0	510246	2906	4442	eb04472_JV297_phos	eb04472.raw	U	K.TRLT#PSQM*K.E	0	0	1	1	119.213	113.279	98.5619	114.049	185.664	143.977	164.509	172.947	111.276	166.774	0.0797657	0.104991	1.49875	0.00131397
1037	YLR055C	SPT8	Subunit of the SAGA transcriptional regulatory complex but not present in SAGA-like complex SLIK/SALSA, required for SAGA-mediated inhibition at some promoters	385	ADDDMDSLFGDED	1000	0	0	510246	12257	16209	eb04472_JV297_phos	eb04472.raw	U	K.ENENADDDM*DS#LFGDEDEDEK.Q	0	0	11	4	78.7625	86.506	60.2843	54.5803	96.4576	101.598	97.6735	123.705	70.0333	104.859	0.215194	0.121633	1.49727	0.0124007
2448	YLR258W	GSY2	Glycogen synthase, similar to Gsy1p; expression induced by glucose limitation, nitrogen starvation, heat shock, and stationary phase; activity regulated by cAMP-dependent, Snf1p and Pho85p kinases as well as by the Gac1p-Glc7p phosphatase	655	PLSVPGSPRDLRS	1000	0	0	510246	9179	12347	eb04472_JV297_phos	eb04472.raw	U	K.VARPLS#VPGS#PR.D	1	1	8	4	411.439	383.307	399.661	376.991	457.049	656.131	546.915	692.443	392.849	588.135	0.0398299	0.182035	1.4971	0.0112341
1521	YLR257W	YLR257W	Putative protein of unknown function	48	LLTPQTSSNHALS	6.59058	-4	6	510247	14120	19090	eb04473_JV297_phos	eb04473.raw	U	R.LLTPQTS#SNHALSK.M	0	0	1	1	57.8499	72.1251	52.3935	48.3067	108.368	77.7832	71.2388	87.713	57.6688	86.2758	0.180344	0.187895	1.49606	0.024939
2078	YGR240C	PFK1	Alpha subunit of heterooctameric phosphofructokinase involved in glycolysis, indispensable for anaerobic growth, activated by fructose-2,6-bisphosphate and AMP, mutation inhibits glucose induction of cell cycle-related genes	179	AFLEATSEDEIIS	9.34047	-1	6	510247	20167	26797	eb04473_JV297_phos	eb04473.raw	U	K.DAFLEATS#EDEIISR.A	1	1	6	5	174.9	202.457	212.281	177.216	290.558	306.757	252.583	297.148	191.714	286.761	0.0967118	0.0827746	1.49578	0.000738465
252	YGR270W	YTA7	Protein that localizes to chromatin and has a role in regulation of histone gene expression; has a bromodomain-like region that interacts with the N-terminal tail of histone H3, and an ATPase domain; potentially phosphorylated by Cdc28p	1142	LEAKEQSQENILQ	1000	0	0	510246	20204	26158	eb04472_JV297_phos	eb04472.raw	U	K.EQS#QENILQEPDLK.D	0	0	1	1	32.3965	33.3063	45.1065	32.1653	62.8061	51.2234	48.3667	51.2495	35.7436	53.4114	0.175173	0.119966	1.49429	0.00758792
1752	YDL122W	UBP1	Ubiquitin-specific protease that removes ubiquitin from ubiquitinated proteins; cleaves at the C terminus of ubiquitin fusions irrespective of their size; capable of cleaving polyubiquitin chains	755	DLEAIQSNNEEDD	1000	0	0	510246	9831	13178	eb04472_JV297_phos	eb04472.raw	U	K.DDLEAIQS#NNEEDDEK.E	0	0	5	5	241.33	236.279	212.884	225.693	360.034	344.548	310.252	354.044	229.047	342.219	0.0549748	0.065002	1.4941	0.00011536
765	YER075C	PTP3	Phosphotyrosine-specific protein phosphatase involved in the inactivation of mitogen-activated protein kinase (MAPK) during osmolarity sensing; dephosporylates Hog1p MAPK and regulates its localization; localized to the cytoplasm	75	VLLKRATAPVLPS	97.6019	0	0	510246	19339	25061	eb04472_JV297_phos	eb04472.raw	U	K.RAT#APVLPSFK.P	0	0	1	1	64.1476	52.358	64.8647	59.181	100.095	84.2408	80.1329	94.8823	60.1378	89.8377	0.0959384	0.102858	1.49386	0.00158351
2016	YER122C	GLO3	ADP-ribosylation factor GTPase activating protein (ARF GAP), involved in ER-Golgi transport; shares functional similarity with Gcs1p	281	DEFTNSSSSTKIR	0	-3	3	510246	4550	6513	eb04472_JV297_phos	eb04472.raw	U	K.EDEFTNSS#SSTK.I	0	0	2	2	108.231	92.9863	82.6242	82.6024	143.914	147.12	125.766	130.499	91.611	136.825	0.132202	0.0753118	1.49354	0.00127559
2702	YER132C	PMD1	Protein with an N-terminal kelch-like domain, putative negative regulator of early meiotic gene expression; required, with Mds3p, for growth under alkaline conditions	1664	APSTQISPRTSVT	2.80603	-8	0	510246	8017	10890	eb04472_JV297_phos	eb04472.raw	U	K.FSQAPSTQIS#PR.T	0	0	1	1	37.5469	47.6661	45.6478	50.6462	82.7112	60.7706	60.8357	66.6643	45.3768	67.7454	0.123614	0.152818	1.49295	0.00897337
248	YGR270W	YTA7	Protein that localizes to chromatin and has a role in regulation of histone gene expression; has a bromodomain-like region that interacts with the N-terminal tail of histone H3, and an ATPase domain; potentially phosphorylated by Cdc28p	212	SSRHPETPPPVRR	1000	0	0	510246	1125	2162	eb04472_JV297_phos	eb04472.raw	U	R.HPET#PPPVR.R	0	0	2	1	33.8902	29.6138	30.6366	31.1327	47.0726	55.082	43.3074	41.3599	31.3183	46.7055	0.0583519	0.129898	1.49131	0.0028318
3565	YMR104C	YPK2	Protein kinase with similarity to serine/threonine protein kinase Ypk1p; functionally redundant with YPK1 at the genetic level; participates in a signaling pathway required for optimal cell wall integrity; homolog of mammalian kinase SGK	46	EKHHDGSPKNHNH	1000	0	0	510247	180	865	eb04473_JV297_phos	eb04473.raw	U	K.HHDGS#PK.N	0	0	1	1	9.69145	10.8987	14.7302	9.68487	13.456	17.2513	18.4437	17.9657	11.2513	16.7792	0.212279	0.135227	1.49131	0.0153063
261	YOR260W	GCD1	Gamma subunit of the translation initiation factor eIF2B, the guanine-nucleotide exchange factor for eIF2; activity subsequently regulated by phosphorylated eIF2; first identified as a negative regulator of GCN4 expression	296	LGPQSMSRQASFK	6.59058	-2	0	510246	3735	5487	eb04472_JV297_phos	eb04472.raw	U	K.LGPQSMS#R.Q	0	0	2	2	144.942	143.377	127.012	150.579	211.042	216.005	190.523	226.023	141.478	210.898	0.0715831	0.0708609	1.49068	0.000253028
237	YPL081W	RPS9A	Protein component of the small (40S) ribosomal subunit; nearly identical to Rps9Bp and has similarity to E. coli S4 and rat S9 ribosomal proteins	184	ARKAEASGEAADE	1000	0	0	510246	2572	4015	eb04472_JV297_phos	eb04472.raw	U	R.KAEAS#GEAADEADEADEE.-	0	0	2	2	19.6458	26.8996	25.0673	34.1258	46.2941	37.8043	34.3144	39.1716	26.4346	39.3961	0.226268	0.127751	1.49032	0.01608
453	YPL105C	SYH1	Protein of unknown function that influences nuclear pore distribution; co-purifies with ribosomes; contains a GYF domain, which bind proline-rich sequences; deletion extends chronological lifespan	638	KFNRASSLDDFIS	9.34047	-1	6	510247	16160	21707	eb04473_JV297_phos	eb04473.raw	U	R.ASS#LDDFISR.T	0	0	4	3	161.289	123.705	144.303	132.7	271.199	199.643	220.235	144.633	140.499	208.927	0.115469	0.250628	1.48704	0.0467471
2051	YLL029W	FRA1	Protein involved in negative regulation of transcription of iron regulon; forms an iron independent complex with Fra2p, Grx3p, and Grx4p; cytosolic; mutant fails to repress transcription of iron regulon and is defective in spore formation	69	ENSRRSSSMLLNE	17.0091	0	0	510246	20103	26036	eb04472_JV297_phos	eb04472.raw	U	R.RSS#SMLLNELK.G	0	0	8	8	626.24	515.522	514.441	498.241	802.593	825.621	736.708	837.813	538.611	800.684	0.109451	0.0563036	1.48657	0.000403466
3328	YPL023C	MET12	Protein with methylenetetrahydrofolate reductase (MTHFR) activity in vitro; null mutant has no phenotype and is prototrophic for methionine; MET13 encodes major isozyme of MTHFR	358	RKRRRHSSLDSAK	17.0091	0	0	510246	1591	2766	eb04472_JV297_phos	eb04472.raw	U	R.HS#SLDSAK.L	0	0	1	1	62.3312	67.6331	78.533	88.2486	128.389	98.3627	114.435	99.5611	74.1865	110.187	0.155674	0.12857	1.48527	0.00763095
3614	YIR002C	MPH1	Member of the DEAH family of helicases, functions in an error-free DNA damage bypass pathway that involves homologous recombination, binds to flap DNA and stimulates activity of Rad27p and Dna2p; mutations confer a mutator phenotype	819	IIRTGESLTTLKP	11.0148	-3	3	510246	13686	17996	eb04472_JV297_phos	eb04472.raw	U	R.TGES#LTTLK.P	0	0	1	1	83.4349	75.4705	87.4024	78.1847	129.702	121.979	114.212	115.556	81.1231	120.362	0.0657538	0.0588993	1.4837	0.000116037
570	YOL109W	ZEO1	Peripheral membrane protein of the plasma membrane that interacts with Mid2p; regulates the cell integrity pathway mediated by Pkc1p and Slt2p; the authentic protein is detected in a phosphorylated state in highly purified mitochondria	49	NLKNEATPEAEQV	1000	0	0	510246	3393	5064	eb04472_JV297_phos	eb04472.raw	U	K.NEAT#PEAEQVK.K	0	0	6	6	256.495	255.931	256.409	259.753	420.609	366.798	393.317	345.182	257.147	381.476	0.00682573	0.0856722	1.4835	0.000270644
43	YPL085W	SEC16	COPII vesicle coat protein required for ER transport vesicle budding; Sec16p is bound to the periphery of ER membranes and may act to stabilize initial COPII complexes; interacts with Sec23p, Sec24p and Sec31p	472	EDLFAASGNDEKL	1000	0	0	510247	8827	12350	eb04473_JV297_phos	eb04473.raw	U	K.HEDLFAAS#GNDEK.L	0	0	1	1	49.2818	46.5931	58.2439	58.5013	82.3393	76.8019	79.3288	76.9045	53.155	78.8436	0.115226	0.0330612	1.48328	0.00024809
3765	YJL016W	YJL016W	Putative protein of unknown function; GFP-fusion protein localizes to the cytoplasm; conserved in closely related Saccharomyces species	521	VKEFSLSDKSNVS	11.0148	-2	0	510246	15204	19877	eb04472_JV297_phos	eb04472.raw	U	K.EFSLS#DK.S	0	0	1	1	26.3378	26.1843	31.001	25.9832	44.7138	37.4993	42.0456	38.1198	27.3766	40.5946	0.0884203	0.0838741	1.48282	0.000728178
2465	YOR018W	ROD1	Membrane protein that binds the ubiquitin ligase Rsp5p via its 2 PY motifs; overexpression confers resistance to the GST substrate o-dinitrobenzene,zinc, and calcium; proposed to regulate the endocytosis of plasma membrane proteins	124	TISSKSSTNLAAL	9.34047	-1	1	510246	15724	20523	eb04472_JV297_phos	eb04472.raw	U	K.SS#TNLAALPK.R	0	0	3	3	196.828	173.022	155.369	158.5	284.667	253.995	227.794	246.443	170.93	253.225	0.110578	0.0935058	1.48145	0.00161361
3990	YOR329C	SCD5	Protein required for normal actin organization and endocytosis; targeting subunit for protein phosphatase type 1; undergoes Crm1p-dependent nuclear-cytoplasmic shuttling; multicopy suppressor of clathrin deficiency	564	IEPSNISPQHTYS	7.97117	-3	6	510247	7088	10145	eb04473_JV297_phos	eb04473.raw	U	K.IEPSNIS#PQHTYSNNVR.I	0	0	1	1	33.7707	36.5886	29.6789	36.1908	46.9797	50.0167	46.0659	58.6123	34.0573	50.4186	0.0931788	0.113401	1.48041	0.00244233
3202	YGR068C	ART5	Protein proposed to regulate the endocytosis of plasma membrane proteins by recruiting the ubiquitin ligase Rsp5p to its target in the plasma membrane	158	LSKRSLSSPVFNK	17.0091	0	0	510247	17374	23268	eb04473_JV297_phos	eb04473.raw	U	R.SLS#SPVFNK.I	0	0	2	2	131.593	125.767	114.406	107.396	193.531	184.181	179.427	151.875	119.791	177.253	0.0911459	0.101014	1.4797	0.00154325
2032	YDR169C	STB3	Ribosomal RNA processing element (RRPE)-binding protein involved in the glucose-induced transition from quiescence to growth; restricted to nucleus in quiescent cells, released into cytoplasm after glucose repletion; binds Sin3p	337	EKLTATSEPTSRR	9.34047	-3	4	510246	2672	4137	eb04472_JV297_phos	eb04472.raw	U	K.LTATS#EPTSR.R	0	0	2	2	88.1552	76.8381	76.9715	78.4461	121.929	116.874	106.679	128.48	80.1027	118.49	0.067632	0.0776172	1.47923	0.000365299
2574	YCR088W	ABP1	Actin-binding protein of the cortical actin cytoskeleton, important for activation of the Arp2/3 complex that plays a key role actin in cytoskeleton organization	481	SLPSRNSIPAPKQ	1000	0	0	510246	6620	9103	eb04472_JV297_phos	eb04472.raw	U	R.NS#IPAPK.Q	0	0	4	4	284.541	303.46	328.227	295.042	526.177	408.726	419.145	436.667	302.818	447.679	0.0615018	0.1197	1.47838	0.00220631
362	YKR028W	SAP190	Protein that forms a complex with the Sit4p protein phosphatase and is required for its function; member of a family of similar proteins including Sap4p, Sap155p, and Sap185p	881	EHRDGNSLYNEDN	4.08456	0	11	510246	3976	5793	eb04472_JV297_phos	eb04472.raw	U	R.DGNS#LYNEDNDENGSDK.W	0	0	2	2	22.6572	15.9168	22.319	19.6703	35.4991	28.8405	18.5426	36.1975	20.1408	29.7699	0.154744	0.27499	1.47809	0.0702459
2361	YFL042C	YFL042C	Putative protein of unknown function; YFL042C is not an essential gene	149	TIAEIGSPLQQVE	43.0662	0	0	510246	22384	28725	eb04472_JV297_phos	eb04472.raw	U	R.ISNATIAEIGS#PLQQVEKPDEVK.T	0	0	1	1	43.02	47.2453	40.547	37.8115	45.7363	64.2447	57.0752	81.8009	42.1559	62.2143	0.0949957	0.243004	1.47581	0.0426181
1760	YGL049C	TIF4632	Translation initiation factor eIF4G, subunit of the mRNA cap-binding protein complex (eIF4F) that also contains eIF4E (Cdc33p); associates with the poly(A)-binding protein Pab1p, also interacts with eIF4A (Tif1p); homologous to Tif4631p	322	NEPENESSSQDVD	0	-10	2	510246	21242	27395	eb04472_JV297_phos	eb04472.raw	U	K.SVTFNEPENES#SSQDVDELVK.D	0	0	2	2	70.3377	89.9881	71.6624	73.4011	109.6	114.832	109.45	116.729	76.3473	112.653	0.120239	0.0327932	1.47553	0.000327569
2558	YBL104C	SEA4	Subunit of the SEA (Seh1-associated) complex, a coatomer-related complex that associates dynamically with the vacuole; has an N-terminal beta-propeller fold and a C-terminal RING motif; promoter contains multiple GCN4 binding sites	123	AENIVGSVSNLKD	4.08456	0	2	510246	20720	26780	eb04472_JV297_phos	eb04472.raw	U	K.AAQAENIVGS#VSNLK.D	0	0	1	1	68.4616	75.4179	77.2006	67.9771	105.08	104.82	104.576	111.953	72.2643	106.607	0.0654709	0.0334871	1.47524	2.48446e-05
3898	YGR126W	YGR126W	Putative protein of unknown function; green fluorescent protein (GFP)-fusion protein localizes to both the cytoplasm and the nucleus and is induced in response to the DNA-damaging agent MMS	188	SKVTTNSQGSSLE	2.80603	-3	4	510247	6853	9846	eb04473_JV297_phos	eb04473.raw	U	K.VTTNS#QGSSLEPNK.L	0	0	1	1	74.2215	58.144	64.1048	71.9765	90.4152	98.8003	83.4233	123.366	67.1117	99.0013	0.110061	0.175931	1.47517	0.0150202
944	YEL022W	GEA2	Guanine nucleotide exchange factor for ADP ribosylation factors (ARFs), involved in vesicular transport between the Golgi and ER, Golgi organization, and actin cytoskeleton organization; similar to but not functionally redundant with Gea1p	284	NNEEAISEDDGIE	88.0565	0	0	510247	8144	11471	eb04473_JV297_phos	eb04473.raw	U	K.VNNEEAIS#EDDGIEEEHIHSEK.S	0	0	4	4	68.4616	76.0386	65.6142	70.5911	103.372	100.935	90.8577	118.325	70.1764	103.372	0.062813	0.10975	1.47304	0.00158031
1566	YNL166C	BNI5	Protein involved in organization of septins at the mother-bud neck, may interact directly with the Cdc11p septin, localizes to bud neck in a septin-dependent manner	194	KGTEENSEIESFK	19.8465	0	0	510246	17592	22860	eb04472_JV297_phos	eb04472.raw	U	R.VDKGT#EENS#EIESFK.S	1	1	3	1	126.3	126.829	98.2808	117.173	205.569	160.698	156.344	167.205	117.146	172.454	0.113831	0.130605	1.47214	0.00552388
2482	YDR379W	RGA2	GTPase-activating protein for the polarity-establishment protein Cdc42p; implicated in control of septin organization, pheromone response, and haploid invasive growth; regulated by Pho85p and Cdc28p	320	NEIIVNTPRNSTD	1000	0	0	510246	6761	9283	eb04472_JV297_phos	eb04472.raw	U	K.ENEIIVNT#PR.N	0	0	1	1	36.6746	27.0364	29.6269	42.19	62.9572	47.2189	39.0892	49.8229	33.8819	49.772	0.202905	0.199063	1.46898	0.0387823
1582	YIL033C	BCY1	Regulatory subunit of the cyclic AMP-dependent protein kinase (PKA), a component of a signaling pathway that controls a variety of cellular processes, including metabolism, cell cycle, stress response, stationary phase, and sporulation	130	HTREKTSTPPLPM	17.0091	0	0	510247	16495	22137	eb04473_JV297_phos	eb04473.raw	U	R.EKT#S#TPPLPMHFNAQR.R	2	2	5	2	69.9194	76.4594	73.6612	86.4581	135.861	95.8565	101.991	116.451	76.6245	112.54	0.092425	0.158023	1.46872	0.00948188
3129	YKL171W	NNK1	Protein kinase; implicated in proteasome function; interacts with TORC1, Ure2 and Gdh2; overexpression leads to hypersensitivity to rapamycin and nuclear accumulation of Gln3; epitope-tagged protein localizes to the cytoplasm	636	SHRKRKSIEQTNL	27.1205	0	0	510247	15472	20826	eb04473_JV297_phos	eb04473.raw	U	K.S#IEQTNLIK.Y	0	0	2	2	109.115	91.1663	111.616	112.154	180.075	160.817	136.627	144.149	106.013	155.417	0.0941946	0.124169	1.46602	0.00390251
1870	YCL037C	SRO9	Cytoplasmic RNA-binding protein that associates with translating ribosomes; involved in heme regulation of Hap1p as a component of the HMC complex, also involved in the organization of actin filaments; contains a La motif	422	QETKEDSAPVAAG	58.5514	0	0	510247	7732	10945	eb04473_JV297_phos	eb04473.raw	U	K.EDS#APVAAGESESSL.-	0	0	7	7	201.596	194.694	183.58	199.043	312.183	296.215	258.397	274.685	194.728	285.37	0.0408755	0.0828823	1.46548	0.000346119
2101	YAL017W	PSK1	One of two (see also PSK2) PAS domain containing S/T protein kinases; coordinately regulates protein synthesis and carbohydrate metabolism and storage in response to a unknown metabolite that reflects nutritional status	919	SSSRISTGTLKDM	9.34047	-1	2	510246	13075	17237	eb04472_JV297_phos	eb04472.raw	U	R.IST#GTLK.D	0	0	1	1	90.3659	89.7987	89.7446	78.0932	147.028	142.916	110.848	108.822	87.0006	127.403	0.0683316	0.159906	1.4644	0.0088886
3189	YLR072W	YLR072W	Protein of unknown function; green fluorescent protein (GFP)-fusion protein localizes to the cytoplasm in a punctate pattern; YLR072W is not an esssential gene	58	SPGRDGSVPLNGL	1000	0	0	510246	16592	21600	eb04472_JV297_phos	eb04472.raw	U	R.DGS#VPLNGLK.S	0	0	1	1	83.9846	74.8393	82.8532	88.6799	148.132	110.27	113.643	111.325	82.5893	120.842	0.0696174	0.151001	1.46317	0.00712771
3862	YDR505C	PSP1	Asn and gln rich protein of unknown function; high-copy suppressor of POL1 (DNA polymerase alpha) and partial suppressor of CDC2 (polymerase delta) and CDC6 (pre-RC loading factor) mutations; overexpression results in growth inhibition	239	TIRRSSYISDTLI	0	-2	4	510247	8608	12069	eb04473_JV297_phos	eb04473.raw	U	R.RSSY#ISDTLINHQM*PDAR.Q	0	0	1	1	23.9478	26.0475	26.5871	29.12	41.344	38.6529	35.9596	38.4462	26.4256	38.6007	0.0804774	0.0570086	1.46073	0.000209658
652	YGR271C-A	EFG1	Essential protein required for maturation of 18S rRNA; null mutant is sensitive to hydroxyurea and is delayed in recovering from alpha-factor arrest; green fluorescent protein (GFP)-fusion protein localizes to the nucleolus	199	SIGLTLSPDKDHE	11.0148	-6	0	510246	21737	27967	eb04472_JV297_phos	eb04472.raw	U	K.KLDEDSIGLTLS#PDK.D	0	0	1	1	54.1335	42.4587	47.5529	51.9925	70.2545	70.2515	68.604	76.9528	49.0344	71.5157	0.105435	0.0518371	1.45848	0.000401923
3449	YNR039C	ZRG17	Endoplasmic reticulum protein of unknown function, transcription is induced under conditions of zinc deficiency; mutant phenotype suggests a role in uptake of zinc	137	SPVRGISPDAGSS	38.1888	0	0	510246	4498	6450	eb04472_JV297_phos	eb04472.raw	U	R.GIS#PDAGSSK.R	0	0	3	3	134.39	136.623	123.057	116.362	190.986	201.234	156.456	194.746	127.608	185.855	0.0749536	0.107888	1.45646	0.00193139
1950	YNL136W	EAF7	Subunit of the NuA4 histone acetyltransferase complex, which acetylates the N-terminal tails of histones H4 and H2A	200	HTEENDSPIDVQK	97.5963	0	0	510247	14420	19476	eb04473_JV297_phos	eb04473.raw	U	K.ELPEYHTEENDS#PIDVQK.E	0	0	2	2	53.0939	71.7569	55.8809	69.2449	93.785	95.1007	90.7092	84.4003	62.4941	90.9988	0.149957	0.0524007	1.45612	0.00163002
3617	YLR006C	SSK1	Cytoplasmic response regulator; part of a two-component signal transducer that mediates osmosensing via a phosphorelay mechanism; required for mitophagy; dephosphorylated form is degraded by the ubiquitin-proteasome system; potential Cdc28p substrate	368	EQLRRASQELKDE	1000	0	0	510246	2299	3664	eb04472_JV297_phos	eb04472.raw	U	R.RAS#QELK.D	0	0	2	1	86.6017	86.3797	76.3782	85.1118	130.969	115.587	99.4301	140.764	83.6178	121.688	0.0582515	0.148729	1.45528	0.00663238
592	YIR003W	AIM21	Protein of unknown function involved in mitochondrial migration along actin filament; may interact with ribosomes; GFP-fusion protein colocalizes with Sac1p to the actin cytoskeleton	36	GDIKANSEPPTPA	18.8054	0	0	510246	5979	8296	eb04472_JV297_phos	eb04472.raw	U	K.ANS#EPPTPAGTPNVPTR.R	0	0	1	1	25.334	25.1954	24.9007	22.6895	43.4937	35.9479	30.9745	32.3287	24.5299	35.6862	0.050557	0.157272	1.4548	0.00815266
2399	YHR119W	SET1	Histone methyltransferase, subunit of the COMPASS (Set1C) complex; COMPASS methylates histone H3K4; Set1p-dependent H3K4 trimethylation recruits Nrd1p, allowing efficient termination of snoRNAs and cryptic unstable transcripts (CUTs) by Nrd1p-Nab3p-Sen1p pathway; modulates histone acetylation levels in promoter proximal regions to ensure efficient Nrd1p-dependent termination; required in transcri…	659	TDSKETTPLNDEG	9.34047	-1	8	510247	5116	7547	eb04473_JV297_phos	eb04473.raw	U	K.ETT#PLNDEGITR.V	0	0	1	1	15.3319	21.4924	22.496	25.7479	34.4998	24.3719	33.0774	31.7363	21.267	30.9213	0.204719	0.145846	1.45396	0.0216547
2353	YOR267C	HRK1	Protein kinase implicated in activation of the plasma membrane H(+)-ATPase Pma1p in response to glucose metabolism; plays a role in ion homeostasis	529	NNDKESTPDNDKE	9.34047	-1	0	510247	872	1945	eb04473_JV297_phos	eb04473.raw	U	K.EST#PDNDK.E	0	0	3	3	140.066	126.903	142.44	131.876	195.135	197.388	173.959	219.881	135.321	196.591	0.0532764	0.0954968	1.45277	0.000889389
3362	YAL035W	FUN12	GTPase, required for general translation initiation by promoting Met-tRNAiMet binding to ribosomes and ribosomal subunit joining; homolog of bacterial IF2	305	SDSKKDSEVVPDD	1000	0	0	510246	14069	18470	eb04472_JV297_phos	eb04472.raw	U	K.KDS#EVVPDDELK.E	0	0	1	1	31.3688	27.4677	32.8019	30.7929	45.9339	40.1778	45.6329	46.0629	30.6078	44.4519	0.0737523	0.0642284	1.4523	0.000268734
2723	YLR332W	MID2	O-glycosylated plasma membrane protein that acts as a sensor for cell wall integrity signaling and activates the pathway; interacts with Rom2p, a guanine nucleotide exchange factor for Rho1p, and with cell integrity pathway protein Zeo1p	352	GEPINSSVASNDI	0	-25	3	510246	20577	26611	eb04472_JV297_phos	eb04472.raw	U	R.DSDSVLPNANTADHNNTNSGGEPINSS#VASNDIIEEK.F	0	0	1	1	17.8892	24.6378	26.7953	26.7543	40.333	25.3001	40.7839	32.9573	24.0192	34.8436	0.175237	0.209631	1.45066	0.0424486
2611	YOR273C	TPO4	Polyamine transport protein, recognizes spermine, putrescine, and spermidine; localizes to the plasma membrane; member of the major facilitator superfamily	633	NEPISNSLYSAIK	4.08456	-2	3	510246	21315	27480	eb04472_JV297_phos	eb04472.raw	U	R.NEPISNS#LYSAIK.D	0	0	1	1	61.0765	54.3253	37.6009	42.569	60.668	77.3323	64.3611	81.0393	48.8929	70.8502	0.219476	0.139158	1.44909	0.023593
26	YAR042W	SWH1	Protein similar to mammalian oxysterol-binding protein; contains ankyrin repeats; localizes to the Golgi and the nucleus-vacuole junction	678	TEANEESDDANSM	28.5286	0	0	510247	10497	14471	eb04473_JV297_phos	eb04473.raw	U	K.LNNQPQVETEANEES#DDANSM*IK.G	1	1	13	6	112.306	113.332	113.396	113.761	192.357	150.514	166.005	146.906	113.199	163.946	0.00551676	0.126103	1.4483	0.0026918
130	YDL019C	OSH2	Member of an oxysterol-binding protein family with seven members in S. cerevisiae; family members have overlapping, redundant functions in sterol metabolism and collectively perform a function essential for viability	451	SLYRRPSNNLSVV	33.6572	0	0	510246	21716	27942	eb04472_JV297_phos	eb04472.raw	U	R.RPS#NNLSVVSSEIQLNDNLTESGK.R	0	0	1	1	37.4393	30.6132	28.8877	30.7668	37.4861	50.6665	45.9298	50.8505	31.9268	46.2332	0.118161	0.135409	1.4481	0.00785016
889	YPL228W	CET1	Beta (RNA 5'-triphosphatase) subunit of the mRNA capping enzyme, a heterodimer (the other subunit is CEG1, a guanylyltransferase) involved in adding the 5' cap to mRNA; the mammalian enzyme is a single bifunctional polypeptide	15	QTKRALSLDDLVN	1000	0	0	510246	21460	27645	eb04472_JV297_phos	eb04472.raw	U	R.ALS#LDDLVNHDENEK.V	0	0	1	1	114.481	94.3223	106.224	104.155	175.938	147.358	146.152	137.367	104.795	151.704	0.0790631	0.110471	1.44762	0.0024083
3755	YPR127W	YPR127W	Protein of unknown function, differentially expressed during alcoholic fermentation; expression activated by transcription factor YRM1/YOR172W; green fluorescent protein (GFP)-fusion protein localizes to both the cytoplasm and the nucleus	245	KSLKRFSDESLKK	15.0073	0	0	510246	7960	10816	eb04472_JV297_phos	eb04472.raw	U	K.RFS#DESLK.K	0	0	1	1	49.8674	65.8762	38.288	48.4243	83.8964	68.2757	76.5579	63.9319	50.614	73.1655	0.225332	0.12118	1.44556	0.020527
4023	YFR010W	UBP6	Ubiquitin-specific protease situated in the base subcomplex of the 26S proteasome, releases free ubiquitin from branched polyubiquitin chains; works in opposition to Hul5p polyubiquitin elongation activity; mutant has aneuploidy tolerance	383	RKFDPSSSENVMT	0	-1	6	510247	7080	10133	eb04473_JV297_phos	eb04473.raw	U	R.KFDPSS#SENVM*TPR.E	0	0	1	1	43.749	46.5931	39.9432	46.7122	74.7979	65.9022	66.8722	48.1303	44.2493	63.9257	0.0718832	0.176125	1.44467	0.0151621
3192	YGL056C	SDS23	One of two S. cerevisiae homologs (Sds23p and Sds24p) of the S. pombe Sds23 protein, which is implicated in APC/cyclosome regulation; involved in cell separation during budding	430	SSRMANSPVLKSS	1000	0	0	510246	6310	8713	eb04472_JV297_phos	eb04472.raw	U	R.M*ANS#PVLK.S	0	0	9	9	818.73	802.15	777.929	798.747	1214.29	1197.59	1076.6	1130.44	799.389	1154.73	0.0209656	0.0549509	1.44451	3.67218e-05
3805	YKR072C	SIS2	Negative regulatory subunit of protein phosphatase 1 Ppz1p and also a subunit of the phosphopantothenoylcysteine decarboxylase (PPCDC; Cab3p, Sis2p, Vhs3p) complex, which catalyzes the third step of coenzyme A biosynthesis	171	DPKKKDSALKIVD	1000	0	0	510246	5297	7443	eb04472_JV297_phos	eb04472.raw	U	K.KKDS#ALK.I	0	0	1	1	115.126	96.5	82.7699	85.0988	151.583	155.367	126.743	113.138	94.8737	136.708	0.155729	0.147769	1.44095	0.0155528
1794	YIL038C	NOT3	Subunit of the CCR4-NOT complex, which is a global transcriptional regulator with roles in transcription initiation and elongation and in mRNA degradation	347	SIKSPRSSADNLL	6.59058	0	8	510246	21666	27885	eb04472_JV297_phos	eb04472.raw	U	R.S#SADNLLPSLQK.S	0	0	2	2	155.995	146.817	156.525	146.894	225.393	213.632	223.192	210.801	151.558	218.255	0.0358553	0.0326412	1.44008	5.77958e-06
336	YDR170C	SEC7	Guanine nucleotide exchange factor (GEF) for ADP ribosylation factors involved in proliferation of the Golgi, intra-Golgi transport and ER-to-Golgi transport; found in the cytoplasm and on Golgi-associated coated vesicles	792	RSSIMTSNDDFKP	19.8431	0	0	510246	15365	20075	eb04472_JV297_phos	eb04472.raw	U	R.SSIMTS#NDDFKPTYEDEESR.S	0	0	4	4	92.3616	100.498	97.0004	93.8295	129.842	147.942	114.089	160.458	95.9223	138.083	0.0376624	0.147325	1.43953	0.00649398
3017	YPL186C	UIP4	Protein that interacts with Ulp1p, a Ubl (ubiquitin-like protein)-specific protease for Smt3p protein conjugates; detected in a phosphorylated state in the mitochondrial outer membrane; also detected in ER and nuclear envelope	140	GNVTFPSPKTAIS	37.5398	0	0	510247	12395	16878	eb04473_JV297_phos	eb04473.raw	U	K.GNVTFPS#PK.T	0	0	2	2	101.671	112.869	107.108	111.905	166.933	149.029	149.665	157.436	108.388	155.766	0.0474082	0.0537256	1.43711	7.09885e-05
1133	YPL019C	VTC3	Subunit of the vacuolar transporter chaperone (VTC) complex involved in membrane trafficking, vacuolar polyphosphate accumulation, microautophagy and non-autophagic vacuolar fusion	274	LSSDGNSNQDVEI	2.01746	-4	0	510247	9718	13494	eb04473_JV297_phos	eb04473.raw	U	K.SNSLS#SDGNS#NQDVEIGK.S	1	1	4	1	16.9212	19.6303	18.9878	23.5521	38.3228	27.7797	22.835	24.5911	19.7729	28.3821	0.140191	0.244377	1.43541	0.0606644
92	YBR279W	PAF1	Component of the Paf1p complex; binds to and modulates the activity of RNA polymerases I and II; required for expression of a subset of genes, including cell cycle-regulated genes; homolog of human PD2/hPAF1; involved in transcription elongation as demonstrated by the G-less-based run-on (GLRO) assay	425	AADTPETSDAVHT	10.0949	-3	6	510246	4983	7053	eb04472_JV297_phos	eb04472.raw	U	R.AADTPET#SDAVHTEQKPEEEK.E	0	0	1	1	23.912	23.0493	21.1011	24.4409	41.3091	31.9168	27.3006	32.099	23.1258	33.1564	0.0634191	0.177075	1.43374	0.0161038
3175	YKR092C	SRP40	Nucleolar, serine-rich protein with a role in preribosome assembly or transport; may function as a chaperone of small nucleolar ribonucleoprotein particles (snoRNPs); immunologically and structurally to rat Nopp140	293	EATADESKAEETP	31.2747	0	0	510247	1115	2280	eb04473_JV297_phos	eb04473.raw	U	K.EATADES#K.A	0	0	1	1	58.782	45.6673	44.992	46.9867	69.2436	74.0571	62.2582	75.9857	49.107	70.3861	0.132425	0.0868854	1.43332	0.00310257
3264	YDR156W	RPA14	RNA polymerase I subunit A14	121	TEKKETSIGVSAT	6.59058	-1	6	510246	8608	11638	eb04472_JV297_phos	eb04472.raw	U	K.ETS#IGVSATGGK.K	0	0	2	2	139.636	143.661	136.402	138.738	163.842	218.949	199.738	216.895	139.609	199.856	0.0216717	0.127629	1.43154	0.00335743
3415	YOR195W	SLK19	Kinetochore-associated protein required for normal segregation of chromosomes in meiosis and mitosis; component of the FEAR regulatory network, which promotes Cdc14p release from the nucleolus during anaphase; potential Cdc28p substrate	273	SHINRLTPLYETS	37.5398	0	0	510247	14479	19550	eb04473_JV297_phos	eb04473.raw	U	R.LT#PLYETSAR.E	0	0	2	1	61.423	55.7665	55.1522	62.8406	105.161	73.9245	70.1255	86.915	58.7956	84.0315	0.0663931	0.188198	1.42922	0.0211572
2608	YBR072W	HSP26	Small heat shock protein (sHSP) with chaperone activity; forms hollow, sphere-shaped oligomers that suppress unfolded proteins aggregation; oligomer activation requires heat-induced conformational change; also has mRNA binding activity	208	KKIEVSSQESWGN	0	-1	3	510246	13914	18278	eb04472_JV297_phos	eb04472.raw	U	K.KIEVSS#QESWGN.-	0	0	2	2	82.8016	86.7584	79.1056	90.3529	138.94	111.225	115.189	118.337	84.7546	120.923	0.0574323	0.102206	1.42674	0.00159372
3274	YOR227W	HER1	Protein of unknown function required for proliferation or remodeling of the ER that is caused by overexpression of Hmg2p; may interact with ribosomes, based on co-purification experiments	1200	YGDELNSRSPSND	8.04319	-8	0	510247	20083	26696	eb04473_JV297_phos	eb04473.raw	U	K.VGLESLYGDELNS#R.S	0	0	1	1	18.7615	20.514	21.5695	21.0035	33.2797	27.9653	25.7915	29.7172	20.4621	29.1884	0.059281	0.108436	1.42646	0.00211751
732	YDL035C	GPR1	Plasma membrane G protein coupled receptor (GPCR) that interacts with the heterotrimeric G protein alpha subunit, Gpa2p, and with Plc1p; sensor that integrates nutritional signals with the modulation of cell fate via PKA and cAMP synthesis	903	TNDDENSIEEDKN	42.8692	0	0	510246	21836	28083	eb04472_JV297_phos	eb04472.raw	U	K.SSFFSSNIVTNDDENS#IEEDK.N	0	0	3	3	142.743	145.933	139.848	119.002	45.8874	288.166	194.432	250.65	136.882	194.784	0.0889518	0.546638	1.42301	0.321398
605	YMR205C	PFK2	Beta subunit of heterooctameric phosphofructokinase involved in glycolysis, indispensable for anaerobic growth, activated by fructose-2,6-bisphosphate and AMP, mutation inhibits glucose induction of cell cycle-related genes	171	LSSKVHSYTDLAY	17.0091	0	0	510246	5687	7932	eb04472_JV297_phos	eb04472.raw	U	K.VHS#YTDLAYR.M	0	0	9	9	447.253	583.166	398.89	390.479	712.643	718.878	591.719	564.712	454.947	646.988	0.19577	0.12398	1.42212	0.0184977
29	YAR042W	SWH1	Protein similar to mammalian oxysterol-binding protein; contains ankyrin repeats; localizes to the Golgi and the nucleus-vacuole junction	1053	TLDRIKTANSATG	7.97117	0	5	510246	6322	8727	eb04472_JV297_phos	eb04472.raw	U	R.IKT#ANSATGGPK.L	0	0	1	1	47.0591	57.4287	52.7371	52.1754	69.2901	66.9365	61.8376	99.3435	52.3501	74.3519	0.0810188	0.227956	1.42028	0.0453734
3132	YKL171W	NNK1	Protein kinase; implicated in proteasome function; interacts with TORC1, Ure2 and Gdh2; overexpression leads to hypersensitivity to rapamycin and nuclear accumulation of Gln3; epitope-tagged protein localizes to the cytoplasm	193	NKLRRDSFSQENS	0	0	17	510247	14852	20028	eb04473_JV297_phos	eb04473.raw	U	R.RDS#FSQENSDSLSPEDSILSR.N	0	0	1	1	30.6996	28.5934	21.5487	25.2904	44.3187	38.2816	31.0982	36.9954	26.533	37.6735	0.150744	0.143944	1.41987	0.0162737
17	YMR261C	TPS3	Regulatory subunit of trehalose-6-phosphate synthase/phosphatase complex, which synthesizes the storage carbohydrate trehalose; expression is induced by stress conditions and repressed by the Ras-cAMP pathway	181	MKNPNLSFDSHPP	33.6572	0	0	510246	7178	9820	eb04472_JV297_phos	eb04472.raw	U	K.NPNLS#FDSHPPR.V	0	0	2	2	85.335	76.5435	73.4009	90.4575	126.147	106.345	114.212	115.701	81.4342	115.601	0.0964542	0.0704218	1.41957	0.000930914
1634	YKL204W	EAP1	eIF4E-associated protein, competes with eIF4G for binding to eIF4E; inhibits cap-dependent translation; functions independently of eIF4E to maintain genetic stability; plays a role in cell growth, implicated in the TOR signaling cascade	282	IPRGPSSITDFLN	6.59058	-1	2	510246	24173	30853	eb04472_JV297_phos	eb04472.raw	U	R.GPSS#ITDFLNLK.R	0	0	2	2	132.239	124.925	122.848	124.413	198.911	180.959	176	159.769	126.106	178.91	0.033167	0.090073	1.41872	0.000718979
3720	YJL098W	SAP185	Protein that forms a complex with the Sit4p protein phosphatase and is required for its function; member of a family of similar proteins including Sap4p, Sap155p, and Sap190p	135	NIDRVTSEDRDLV	0	-1	0	510246	4472	6419	eb04472_JV297_phos	eb04472.raw	U	R.VTS#EDRDLVR.G	0	0	2	2	149.53	158.631	159.283	166.773	237.036	210.887	211.032	240.107	158.555	224.766	0.0445256	0.0711464	1.41759	0.000274994
3869	YGL227W	VID30	Protein involved in proteasome-dependent catabolite degradation of fructose-1,6-bisphosphatase (FBPase); binds FBPase; shifts the balance of nitrogen metabolism toward glutamate production; localizes to the nucleus and the cytoplasm	277	YYPPDQSPSSSFS	11.0148	-10	7	510247	13204	17911	eb04473_JV297_phos	eb04473.raw	U	K.NSGLQYYPPDQS#PSSSFSSPR.V	0	0	1	1	18.5344	23.5122	23.308	30.5707	35.3364	36.3589	30.7642	33.4288	23.9813	33.9721	0.206768	0.072391	1.41661	0.0112299
3421	YMR192W	GYL1	Putative GTPase activating protein (GAP) with a role in exocytosis; stimulates Gyp5p GAP activity on Ypt1p, colocalizes with Gyp5p at sites of polarized growth; interacts with Gyp5p, Rvs161p, and Rvs167p; involved in recruiting Rvs167p to the bud tip during polarized growth	78	ESIGAFSNPHEAL	16.144	0	0	510247	13889	18788	eb04473_JV297_phos	eb04473.raw	U	K.DGESIGAFS#NPHEALM*QSK.L	1	1	3	2	47.1547	43.8579	43.0349	47.2611	64.0959	62.1364	64.992	65.4673	45.3272	64.1729	0.0484911	0.0229373	1.41577	7.47295e-06
3009	YNL098C	RAS2	GTP-binding protein that regulates the nitrogen starvation response, sporulation, and filamentous growth; farnesylation and palmitoylation required for activity and localization to plasma membrane; homolog of mammalian Ras proto-oncogenes	188	LTENDNSKQTSQD	38.1888	0	0	510247	3027	4809	eb04473_JV297_phos	eb04473.raw	U	K.TLTENDNS#K.Q	0	0	2	2	60.2161	67.7909	57.2862	65.3761	99.7693	88.2586	75.5931	90.9168	62.6673	88.6344	0.0762804	0.112713	1.41436	0.00336321
3494	YNL095C	YNL095C	Putative protein of unknown function predicted to contain a transmembrane domain; YNL095C is not an essential gene	418	NLTRILTSDATVS	0	0	6	510246	15401	20119	eb04472_JV297_phos	eb04472.raw	R	R.ILT#SDATVSK.K	0	0	1	1	38.5866	46.025	47.0116	51.535	83.1295	58.8081	56.0856	61.0182	45.7895	64.7603	0.117229	0.191647	1.4143	0.0309238
725	YDL226C	GCS1	ADP-ribosylation factor GTPase activating protein (ARF GAP), involved in ER-Golgi transport; shares functional similarity with Glo3p	161	AQSREGTPLENRR	1000	0	0	510246	1210	2279	eb04472_JV297_phos	eb04472.raw	U	R.EGT#PLENR.R	0	0	1	1	42.3986	50.3698	58.4209	49.7575	79.7016	78.2605	63.9653	62.191	50.2367	71.0296	0.130361	0.12993	1.4139	0.0103943
2640	YER151C	UBP3	Ubiquitin-specific protease that interacts with Bre5p to co-regulate anterograde and retrograde transport between the ER and Golgi; inhibitor of gene silencing; cleaves ubiquitin fusions but not polyubiquitin; also has mRNA binding activity	663	GVINDDSTEENGW	6.59058	-7	13	510246	16204	21115	eb04472_JV297_phos	eb04472.raw	U	K.YGVINDDS#TEENGWHEVSGSSK.R	0	0	1	1	7.2417	10.9408	7.89078	9.89399	12.1313	11.9738	12.3205	14.375	8.99182	12.7001	0.191419	0.0886239	1.41241	0.01128
1951	YNL136W	EAF7	Subunit of the NuA4 histone acetyltransferase complex, which acetylates the N-terminal tails of histones H4 and H2A	411	AGSRKNSPPATRV	11.0148	0	4	510246	802	1731	eb04472_JV297_phos	eb04472.raw	U	R.KNS#PPATR.V	0	0	1	1	7.3134	7.97416	7.97406	12.691	13.026	11.7351	14.0523	11.9449	8.98815	12.6896	0.276822	0.0843346	1.41181	0.0340413
1859	YML123C	PHO84	High-affinity inorganic phosphate (Pi) transporter and low-affinity manganese transporter; regulated by Pho4p and Spt7p; mutation confers resistance to arsenate; exit from the ER during maturation requires Pho86p	302	EKKIHDTSDEDMA	1000	0	0	510246	14978	19600	eb04472_JV297_phos	eb04472.raw	U	K.IHDT#S#DEDMAINGLER.A	1	1	3	1	22.0119	19.0938	25.0048	26.8719	28.2947	36.0142	31.6672	35.2303	23.2456	32.8016	0.146947	0.108241	1.41109	0.00817906
3322	YOR004W	UTP23	Essential nucleolar protein that is a component of the SSU (small subunit) processome involved in 40S ribosomal subunit biogenesis; has homology to PINc domain protein Fcf1p, although the PINc domain of Utp23p is not required for function	215	KKKKVNSPSDEVK	30.8348	0	0	510247	4503	6759	eb04473_JV297_phos	eb04473.raw	U	K.VNS#PSDEVK.D	0	0	2	2	99.9139	92.2183	92.7531	113.238	170.895	127.813	136.181	126.123	99.531	140.253	0.0983484	0.148988	1.40914	0.012375
966	YGR167W	CLC1	Clathrin light chain, subunit of the major coat protein involved in intracellular protein transport and endocytosis; thought to regulate clathrin function; two Clathrin heavy chains (CHC1) form the clathrin triskelion structural component	52	ILETEASPAKDDD	7.97117	-11	0	510246	13172	17356	eb04472_JV297_phos	eb04472.raw	U	K.TEQDDILETEAS#PAK.D	0	0	4	4	132.334	125.409	168.652	147.521	218.142	158.444	178.474	252.766	143.479	201.956	0.133505	0.207893	1.40757	0.044421
138	YOR220W	RCN2	Protein of unknown function; green fluorescent protein (GFP)-fusion protein localizes to the cytoplasm and is induced in response to the DNA-damaging agent MMS; phosphorylated in response to alpha factor	160	DKSSLESPTMLKL	17.0091	0	0	510246	16739	21788	eb04472_JV297_phos	eb04472.raw	U	K.SSLES#PTMLK.L	0	0	14	14	989.711	1057.47	978.217	1040.1	1734.97	1267.36	1370.94	1348.75	1016.37	1430.51	0.0377596	0.145265	1.40746	0.00780616
4012	YDL042C	SIR2	Conserved NAD+ dependent histone deacetylase of the Sirtuin family involved in regulation of lifespan; plays roles in silencing at HML, HMR, telomeres, and the rDNA locus; negatively regulates initiation of DNA replication	23	KVSNTVSPTQDKD	4.08456	-4	2	510247	4526	6787	eb04473_JV297_phos	eb04473.raw	U	K.VSNTVS#PTQDK.D	0	0	1	1	102.782	86.6427	97.4272	93.7903	134.188	126.699	124.479	150.17	95.1605	133.884	0.0711832	0.0868255	1.40693	0.00119754
2514	YFL014W	HSP12	Plasma membrane protein involved in maintaining membrane organization in stress conditions; induced by heat shock, oxidative stress, osmostress, stationary phase, glucose depletion, oleate and alcohol; regulated by HOG and Ras-Pka pathways	21	EALKPDSQKSYAE	55.37	0	0	510246	6715	9223	eb04472_JV297_phos	eb04472.raw	U	K.ASEALKPDS#QK.S	0	0	2	2	103.595	159.01	99.9776	128.008	198.9	160.088	140.214	190.72	122.647	172.48	0.222191	0.157906	1.40631	0.0413872
2920	YJL141C	YAK1	Serine-threonine protein kinase; component of a glucose-sensing system that inhibits growth in response to glucose availability; upon nutrient deprivation Yak1p phosphorylates Pop2p to regulate mRNA deadenylation, the co-repressor Crf1p to inhibit transcription of ribosomal genes, and the stress-responsive transcription factors Hsf1p and Msn2p; nuclear localization negatively regulated by the Ras…	288	QPVLNATPKFRRA	1000	0	0	510246	16509	21496	eb04472_JV297_phos	eb04472.raw	U	K.NDLQPVLNAT#PK.F	0	0	1	1	32.6116	33.3379	37.1325	37.0404	56.1595	51.2499	45.4598	44.0922	35.0306	49.2403	0.0683015	0.112896	1.40564	0.00334055
3530	YDL129W	YDL129W	Putative protein of unknown function; green fluorescent protein (GFP)-fusion protein localizes to the cytoplasm and the nucleus; YDL129W is not an essential gene	185	PLKRKLSLPGLAQ	1000	0	0	510246	20492	26511	eb04472_JV297_phos	eb04472.raw	U	R.KLS#LPGLAQR.P	0	0	2	2	281.339	241.823	245.457	243.755	392.338	365.499	337.231	327.518	253.094	355.646	0.0746305	0.0823561	1.4052	0.00106732
518	YGL023C	PIB2	Protein binding phosphatidylinositol 3-phosphate, involved in telomere-proximal repression of gene expression; similar to Fab1 and Vps27	346	LRKVSETNITNDD	5.08456	-2	16	510246	22809	29227	eb04472_JV297_phos	eb04472.raw	U	R.KVSET#NITNDDLLNATLSSYYK.K	0	0	2	2	94.3333	90.8402	74.9104	72.9437	84.0823	138.686	126.891	118.204	83.2569	116.966	0.130882	0.200695	1.40488	0.0403905
494	YOR124C	UBP2	Ubiquitin-specific protease that removes ubiquitin from ubiquitinated proteins; interacts with Rsp5p and is required for MVB sorting of membrane proteins; can cleave polyubiquitin and has isopeptidase activity	907	SNDAEVSENEDTT	17.8481	0	0	510246	5565	7778	eb04472_JV297_phos	eb04472.raw	U	K.KNESNDAEVS#ENEDTTGLTSPTR.V	0	0	3	2	74.1139	75.6704	75.2643	73.3488	93.1111	111.742	95.4964	118.833	74.5994	104.796	0.0142468	0.119222	1.40478	0.00295106
1977	YHR027C	RPN1	Non-ATPase base subunit of the 19S regulatory particle of the 26S proteasome; may participate in the recognition of several ligands of the proteasome; contains a leucine-rich repeat (LRR) domain, a site for protein-protein interactions	647	AEGQTNSISDFLG	0	-7	13	510247	20322	26980	eb04473_JV297_phos	eb04473.raw	U	K.GEEDADEEETAEGQTNS#ISDFLGEQVNEPTK.N	0	0	2	2	23.1233	23.4175	21.3197	29.7342	39.9612	36.518	31.9641	28.6049	24.3987	34.2621	0.150662	0.145791	1.40426	0.0190576
3381	YOR109W	INP53	Polyphosphatidylinositol phosphatase, dephosphorylates multiple phosphatidylinositols; involved in trans Golgi network-to-early endosome pathway; hyperosmotic stress causes translocation to actin patches; contains Sac1 and 5-ptase domains	988	SKEKSPTPQTSTA	7.97117	-2	12	510247	12037	16425	eb04473_JV297_phos	eb04473.raw	U	K.SPT#PQTSTASLSSVTK.N	0	0	2	2	95.8629	100.487	100.727	98.7177	68.2326	181.94	132.656	172.887	98.9487	138.929	0.0226772	0.372638	1.40405	0.173755
227	YPL180W	TCO89	Subunit of TORC1 (Tor1p or Tor2p-Kog1p-Lst8p-Tco89p), a complex that regulates growth in response to nutrient availability; cooperates with Ssd1p in the maintenance of cellular integrity; deletion strains are hypersensitive to rapamycin	52	GLRRVLTHDGTLD	0	0	9	510246	20232	26195	eb04472_JV297_phos	eb04472.raw	U	R.VLT#HDGTLDNDYFNK.H	0	0	2	2	92.9949	81.6983	62.7515	62.2393	125.891	108.759	90.4866	95.5231	74.921	105.165	0.201175	0.15044	1.40368	0.0325015
1976	YHR027C	RPN1	Non-ATPase base subunit of the 19S regulatory particle of the 26S proteasome; may participate in the recognition of several ligands of the proteasome; contains a leucine-rich repeat (LRR) domain, a site for protein-protein interactions	187	GSKSDGSAATSGF	2.80603	-3	9	510246	16294	21229	eb04472_JV297_phos	eb04472.raw	U	K.SDGS#AATSGFEFSK.E	0	0	2	2	137.461	130.406	141.295	137.915	179.796	199.258	187.987	199.739	136.769	191.695	0.0334431	0.0501477	1.4016	4.84155e-05
4030	YGR134W	CAF130	Part of the evolutionarily-conserved CCR4-NOT transcriptional regulatory complex involved in controlling mRNA initiation, elongation, and degradation	1042	LNAKPASELNLKL	1000	0	0	510247	15611	21005	eb04473_JV297_phos	eb04473.raw	U	K.PAS#ELNLK.L	0	0	1	1	63.9922	66.0235	68.3729	64.5266	90.9962	107.393	81.0359	88.5713	65.7288	91.999	0.0298378	0.120699	1.39968	0.00346932
3827	YPL004C	LSP1	Primary component of eisosomes, which are large immobile patch structures at the cell cortex associated with endocytosis, along with Pil1p and Sur7p; null mutants show activation of Pkc1p/Ypk1p stress resistance pathways; member of the BAR domain family	233	LDDSPVTPGEARP	23.6238	0	0	510247	22843	30004	eb04473_JV297_phos	eb04473.raw	U	K.ALLELLDDSPVT#PGEAR.P	0	0	1	1	35.9098	33.7902	34.5612	35.7203	49.4547	45.6011	45.9669	54.8765	34.9954	48.9748	0.028587	0.0878156	1.39947	0.000725837
712	YDR028C	REG1	Regulatory subunit of type 1 protein phosphatase Glc7p, involved in negative regulation of glucose-repressible genes	1013	QENGNDSSxxxxx	20.4296	0	0	510247	2502	4122	eb04473_JV297_phos	eb04473.raw	U	K.KSDVKPQENGNDS#S.-	0	0	1	1	46.4377	40.1338	37.2366	36.1908	54.0562	55.7848	53.1786	60.8006	39.9997	55.9551	0.115117	0.0608877	1.39889	0.00141831
2457	YDR293C	SSD1	Translational repressor with a role in cell wall polar growth and integrity; regulated by Cbk1p phosphorylation to effect bud-specific translational control of specific mRNAs; interacts with TOR pathway components	1139	PKSYRNSIKNKFR	24.2431	0	0	510246	2216	3560	eb04472_JV297_phos	eb04472.raw	U	K.SYRNS#IK.N	0	0	2	2	304.57	297.663	237.202	242.448	317.284	427.436	350.788	416.222	270.471	377.933	0.131486	0.139442	1.39731	0.0148478
832	YJR093C	FIP1	Subunit of cleavage polyadenylation factor (CPF), interacts directly with poly(A) polymerase (Pap1p) to regulate its activity; bridging factor that links Pap1p and the CPF complex via Yth1p	50	KRQKFDSPVEETP	39.6629	0	0	510246	7704	10493	eb04472_JV297_phos	eb04472.raw	U	R.QKFDS#PVEETPATAR.D	0	0	1	1	23.2308	17.8945	19.6853	17.9059	22.3801	30.7499	25.977	30.8779	19.6791	27.4962	0.127692	0.149222	1.39723	0.0174791
2104	YAL017W	PSK1	One of two (see also PSK2) PAS domain containing S/T protein kinases; coordinately regulates protein synthesis and carbohydrate metabolism and storage in response to a unknown metabolite that reflects nutritional status	1020	KISLSPSTESLAD	0	-4	7	510246	20960	27063	eb04472_JV297_phos	eb04472.raw	U	K.ISLSPS#TESLADSK.S	0	0	1	1	67.5773	68.4957	60.8256	57.9001	103.464	83.6839	82.7429	86.0445	63.6997	88.984	0.0810335	0.109605	1.39693	0.00376003
269	YMR216C	SKY1	SR protein kinase (SRPK) involved in regulating proteins involved in mRNA metabolism and cation homeostasis; similar to human SRPK1	335	RHVSRSSDITAND	0	-1	8	510247	2855	4587	eb04473_JV297_phos	eb04473.raw	U	R.SS#DITANDSSDEK.W	0	0	1	1	89.7684	86.1904	98.26	104.926	158.137	105.178	149.689	116.197	94.7862	132.3	0.0890942	0.193437	1.39578	0.0318254
807	YJL123C	MTC1	Protein of unknown function that may interact with ribosomes; green fluorescent protein (GFP)-fusion protein localizes to the cytoplasm and to COPI-coated vesicles (early Golgi); mtc1 is synthetically lethal with cdc13-1	339	DDRSSISSNSNKI	6.59058	-3	3	510246	1620	2803	eb04472_JV297_phos	eb04472.raw	U	R.SSIS#SNSNK.I	1	1	5	4	158.409	174.937	168.704	174.576	259.184	224.982	216.599	243.493	169.157	236.064	0.0455998	0.0807989	1.39554	0.000629161
119	YLR330W	CHS5	Component of the exomer complex, which also contains Csh6p, Bch1p, Bch2p, and Bud7p and is involved in export of selected proteins, such as chitin synthase Chs3p, from the Golgi to the plasma membrane	399	NEAVAESSPNEEA	7.71046	-16	7	510246	13869	18223	eb04472_JV297_phos	eb04472.raw	U	K.ADSSAEAVVEEPNEAVAES#SPNEEATGQK.S	0	0	7	6	111.78	124.283	117.518	114.846	179.901	162.859	154.674	155.84	117.107	163.319	0.0454944	0.0712157	1.39461	0.000356641
3924	YPR162C	ORC4	Subunit of the origin recognition complex, which directs DNA replication by binding to replication origins and is also involved in transcriptional silencing	9	ISEARLSPQVNLL	1000	0	0	510247	22272	29299	eb04473_JV297_phos	eb04473.raw	U	R.LS#PQVNLLPIK.R	0	0	1	1	31.5002	32.2333	24.2449	33.6814	35.534	47.0863	40.4252	46.5949	30.4149	42.4101	0.138485	0.129579	1.39438	0.0133882
116	YLR330W	CHS5	Component of the exomer complex, which also contains Csh6p, Bch1p, Bch2p, and Bud7p and is involved in export of selected proteins, such as chitin synthase Chs3p, from the Golgi to the plasma membrane	368	SVRSLKSEPVGTP	22.4917	0	0	510246	17258	22440	eb04472_JV297_phos	eb04472.raw	U	R.S#LKS#EPVGTPNIEENK.A	1	1	4	1	30.0065	34.6739	43.3264	47.9277	64.2121	48.4653	50.8283	53.8851	38.9836	54.3477	0.208406	0.127704	1.39412	0.0282145
335	YDR170C	SEC7	Guanine nucleotide exchange factor (GEF) for ADP ribosylation factors involved in proliferation of the Golgi, intra-Golgi transport and ER-to-Golgi transport; found in the cytoplasm and on Golgi-associated coated vesicles	76	ATNGMKTPEETED	27.1205	0	0	510246	1734	2954	eb04472_JV297_phos	eb04472.raw	U	K.T#PEETEDTNDK.R	0	0	1	1	37.0809	35.4314	30.6679	30.0479	52.1389	40.6552	42.8621	50.0526	33.307	46.4272	0.104497	0.119145	1.39392	0.00699775
2613	YGR261C	APL6	Beta3-like subunit of the yeast AP-3 complex; functions in transport of alkaline phosphatase to the vacuole via the alternate pathway; exists in both cytosolic and peripherally associated membrane-bound pools	10	SIHRIASALDTAK	44.2778	0	0	510246	18832	24399	eb04472_JV297_phos	eb04472.raw	U	R.IAS#ALDTAK.V	0	0	4	4	665.639	517.1	402.409	321.234	489.492	827.901	534.805	804.493	476.596	664.173	0.313608	0.266155	1.39358	0.156231
604	YMR205C	PFK2	Beta subunit of heterooctameric phosphofructokinase involved in glycolysis, indispensable for anaerobic growth, activated by fructose-2,6-bisphosphate and AMP, mutation inhibits glucose induction of cell cycle-related genes	167	AESGLSSKVHSYT	18.8054	0	0	510247	11709	16008	eb04473_JV297_phos	eb04473.raw	U	K.PTPPPAPEASAES#GLSS#K.V	2	2	4	1	49.5567	51.9372	55.5894	51.6788	85.0584	71.8029	65.5981	68.3448	52.1905	72.701	0.0479853	0.118575	1.39299	0.00381204
1687	YDL182W	LYS20	Homocitrate synthase isozyme, catalyzes the condensation of acetyl-CoA and alpha-ketoglutarate to form homocitrate, which is the first step in the lysine biosynthesis pathway; highly similar to the other isozyme, Lys21p	396	FHAEVSTPQVLSA	6.59058	-1	5	510246	17887	23229	eb04472_JV297_phos	eb04472.raw	U	K.NFHAEVST#PQVLSAK.K	0	0	6	6	251.954	267.061	305.544	289.514	314.216	401.075	371.483	462.044	278.518	387.205	0.085173	0.158977	1.39023	0.0165093
2102	YAL017W	PSK1	One of two (see also PSK2) PAS domain containing S/T protein kinases; coordinately regulates protein synthesis and carbohydrate metabolism and storage in response to a unknown metabolite that reflects nutritional status	953	DDSRAHSQSTLSE	9.29637	0	5	510247	9190	12814	eb04473_JV297_phos	eb04473.raw	U	R.AHS#QSTLSEQEQVPLENDK.D	0	0	2	1	27.4611	28.2041	19.321	23.6828	36.7889	34.2638	31.0734	35.0006	24.6673	34.2817	0.165282	0.0696348	1.38976	0.00657567
3319	YJR127C	RSF2	Zinc-finger protein involved in transcriptional control of both nuclear and mitochondrial genes, many of which specify products required for glycerol-based growth, respiration, and other functions	231	ASKRRHSVAADDP	37.549	0	0	510247	11701	15998	eb04473_JV297_phos	eb04473.raw	U	R.RHS#VAADDPTDLHIIK.I	0	0	1	1	68.2943	78.5739	71.652	87.5559	115.236	115.097	103.574	91.34	76.519	106.312	0.111242	0.107037	1.38935	0.00573029
811	YMR165C	PAH1	Mg<sup>2+</sup>-dependent phosphatidate (PA) phosphatase, catalyzes the dephosphorylation of PA to yield diacylglycerol, responsible for de novo lipid synthesis and formation of lipid droplets; homologous to mammalian lipin 1	748	LGSPLASPKLRYL	36.684	0	0	510247	21733	28649	eb04473_JV297_phos	eb04473.raw	U	K.QIYLELGS#PLAS#PK.L	1	1	2	1	29.8631	31.8966	23.308	22.0099	45.0507	33.6539	34.0299	35.9919	26.7694	37.1816	0.181082	0.143762	1.38896	0.0278429
148	YIR006C	PAN1	Part of actin cytoskeleton-regulatory complex Pan1p-Sla1p-End3p, associates with actin patches on the cell cortex; promotes protein-protein interactions essential for endocytosis; previously thought to be a subunit of poly(A) ribonuclease	1005	DRSSSPSYSQFKT	13.3795	0	0	510247	7327	10438	eb04473_JV297_phos	eb04473.raw	U	R.SSSPS#YSQFK.T	0	0	1	1	32.8625	31.7388	34.2385	45.7189	51.3372	46.9139	49.1213	53.2806	36.1397	50.1632	0.178956	0.0548847	1.38804	0.00719918
3800	YDL224C	WHI4	Putative RNA binding protein and partially redundant Whi3p homolog that regulates the cell size requirement for passage through Start and commitment to cell division	274	ISQRKESVPFLRN	1000	0	0	510247	16356	21961	eb04473_JV297_phos	eb04473.raw	U	R.KES#VPFLR.N	0	0	1	1	49.5447	57.2288	48.8125	55.4168	76.5177	70.9675	68.3319	76.977	52.7507	73.1985	0.0796419	0.0579369	1.38763	0.000475894
2843	YER033C	ZRG8	Protein of unknown function; authentic, non-tagged protein is detected in highly purified mitochondria in high-throughput studies; GFP-fusion protein is localized to the cytoplasm; transcription induced under conditions of zinc deficiency	403	YSLNNNSDEYSVN	7.97117	-6	4	510246	15072	19715	eb04472_JV297_phos	eb04472.raw	U	K.VYSLNNNS#DEYSVNEK.E	1	1	2	1	10.6116	13.1816	18.0509	22.9248	16.4772	26.573	22.5381	24.2405	16.1922	22.4572	0.336359	0.192195	1.38691	0.121437
187	YJR125C	ENT3	Protein containing an N-terminal epsin-like domain involved in clathrin recruitment and traffic between the Golgi and endosomes; associates with the clathrin adaptor Gga2p	320	TDQGKITPAIAEP	1000	0	0	510246	17016	22143	eb04472_JV297_phos	eb04472.raw	U	K.IT#PAIAEPK.K	0	0	1	1	92.9232	97.8465	87.5377	83.648	138.022	131.871	109.808	122.061	90.4889	125.441	0.0685903	0.0982232	1.38625	0.00229505
2647	YDR348C	YDR348C	Protein of unknown function; green fluorescent protein (GFP)-fusion protein localizes to the cell periphery and bud neck; potential Cdc28p substrate	64	RTSSQLSFPNIPE	15.0073	0	0	510246	20055	25974	eb04472_JV297_phos	eb04472.raw	U	R.TSSQLS#FPNIPEDEPQR.N	1	1	3	1	49.3296	56.0716	52.3519	48.1891	82.6531	67.7984	60.8728	74.1359	51.4855	71.365	0.0684845	0.129923	1.38612	0.00705387
3323	YMR037C	MSN2	Transcriptional activator related to Msn4p; activated in stress conditions, which results in translocation from the cytoplasm to the nucleus; binds DNA at stress response elements of responsive genes, inducing gene expression	451	SRRQRASLPIIDD	6.60311	0	10	510247	21895	28840	eb04473_JV297_phos	eb04473.raw	U	R.QRAS#LPIIDDSLSYDLVNK.Q	0	0	1	1	17.0049	21.04	19.5292	17.6184	25.0527	23.9608	25.3956	29.7535	18.7981	26.0407	0.0979367	0.0979124	1.38528	0.00366912
3298	YDL173W	PAR32	Putative protein of unknown function; hyperphosphorylated upon rapamycin treatment in a Tap42p-dependent manner; green fluorescent protein (GFP)-fusion protein localizes to the cytoplasm; PAR32 is not an essential gene	284	KKKKKKSGFFSSL	18.8054	0	0	510246	22240	28555	eb04472_JV297_phos	eb04472.raw	U	K.S#GFFSSLK.T	0	0	1	1	141.404	125.388	105.485	102.573	189.511	209.163	137.344	121.323	118.713	164.335	0.153405	0.253877	1.38431	0.0918629
2949	YNL199C	GCR2	Transcriptional activator of genes involved in glycolysis; interacts and functions with the DNA-binding protein Gcr1p	239	GRRKGNSLNTSTK	15.0073	0	0	510247	2337	3903	eb04473_JV297_phos	eb04473.raw	U	K.GNS#LNTSTK.G	0	0	1	1	21.7729	33.422	24.5051	21.2649	40.67	33.76	34.302	31.0109	25.2412	34.9357	0.223302	0.116939	1.38407	0.0317761
2809	YNL118C	DCP2	Catalytic subunit of the Dcp1p-Dcp2p decapping enzyme complex, which removes the 5' cap structure from mRNAs prior to their degradation; member of the Nudix hydrolase family	679	RDMPTESNKSINE	17.0091	0	0	510246	4219	6099	eb04472_JV297_phos	eb04472.raw	U	R.DMPTES#NK.S	0	0	5	4	186.002	168.878	216.799	215.929	321.456	248.983	266.338	252.935	196.902	272.428	0.119542	0.123036	1.38357	0.0102327
3320	YJR127C	RSF2	Zinc-finger protein involved in transcriptional control of both nuclear and mitochondrial genes, many of which specify products required for glycerol-based growth, respiration, and other functions	296	NDKREKTPPSKAG	23.6238	0	0	510246	3132	4731	eb04472_JV297_phos	eb04472.raw	U	R.EKT#PPSK.A	0	0	1	1	116.763	109.345	112.719	127.419	161.32	158.563	170.384	154.8	116.562	161.267	0.0673296	0.0411723	1.38353	0.000127593
60	YPL085W	SEC16	COPII vesicle coat protein required for ER transport vesicle budding; Sec16p is bound to the periphery of ER membranes and may act to stabilize initial COPII complexes; interacts with Sec23p, Sec24p and Sec31p	268	KLETHVSTEEKKQ	6.59058	-3	1	510247	5685	8308	eb04473_JV297_phos	eb04473.raw	U	K.LETHVS#TEEK.K	0	0	1	1	40.1998	42.8269	47.2926	35.8118	57.4958	45.3094	61.4542	65.5762	41.5328	57.4589	0.115769	0.152208	1.38346	0.0188007
2724	YNL178W	RPS3	Protein component of the small (40S) ribosomal subunit, has apurinic/apyrimidinic (AP) endonuclease activity; essential for viability; has similarity to E. coli S3 and rat S3 ribosomal proteins	221	EPILAPSVKDYRP	1000	0	0	510246	18442	23916	eb04472_JV297_phos	eb04472.raw	U	K.EEEPILAPS#VK.D	0	0	3	3	336.608	331.012	310.863	272.823	432.857	437.991	375.38	482.028	312.827	432.064	0.0922864	0.101285	1.38116	0.00389701
3673	YOR014W	RTS1	B-type regulatory subunit of protein phosphatase 2A (PP2A); Rts1p and Cdc55p are alternative regulatory subunits for PP2A; PP2A-Rts1p protects cohesin when recruited by Sgo1p to the pericentromere; highly enriched at centromeres in absence of Cdc55p; homolog of the mammalian B' subunit of PP2A	272	FEPSRYTPLTKLP	0	-3	3	510246	15009	19638	eb04472_JV297_phos	eb04472.raw	U	R.FEPSRYT#PLTK.L	0	0	2	2	132.263	122.526	122.932	116.571	158.636	186.515	173.86	163.59	123.573	170.65	0.0524528	0.0722609	1.38097	0.000511974
804	YJL123C	MTC1	Protein of unknown function that may interact with ribosomes; green fluorescent protein (GFP)-fusion protein localizes to the cytoplasm and to COPI-coated vesicles (early Golgi); mtc1 is synthetically lethal with cdc13-1	72	LEELEKSNLSLTD	23.6238	0	0	510246	11448	15206	eb04472_JV297_phos	eb04472.raw	U	K.S#NLSLTDK.K	1	1	6	3	189.658	191.611	161.917	144.528	251.306	232.766	233.632	231.959	171.929	237.416	0.132326	0.0391095	1.3809	0.00177796
3407	YGR023W	MTL1	Putative plasma membrane sensor, involved in cell integrity signaling and stress response during glucose starvation and oxidative stress; has structural and functional similarity to Mid2p	494	GIDDQYSPTKSAS	6.59058	-1	2	510246	6882	9435	eb04472_JV297_phos	eb04472.raw	U	R.GIDDQYS#PTK.S	0	0	2	2	143.042	175.474	139.744	149.442	237.49	198.728	178.845	224.088	151.925	209.788	0.106677	0.124655	1.38086	0.00938253
2066	YJR059W	PTK2	Putative serine/threonine protein kinase involved in regulation of ion transport across plasma membrane; enhances spermine uptake	786	RSLGSPSVSSSKK	20.1669	0	0	510246	7091	9708	eb04472_JV297_phos	eb04472.raw	U	R.SLGSPS#VSSSK.K	0	0	2	2	132.466	139.948	143.169	129.511	207.324	197.68	182.272	165.101	136.273	188.094	0.0466574	0.0982356	1.38027	0.00182307
85	YDR122W	KIN1	Serine/threonine protein kinase involved in regulation of exocytosis; localizes to the cytoplasmic face of the plasma membrane; closely related to Kin2p	593	PEQAHTSPTSRKS	0	-1	3	510246	1974	3258	eb04472_JV297_phos	eb04472.raw	U	R.LAM*PEQAHTS#PTSR.K	0	0	3	3	116.202	114.994	108.618	112.337	166.48	154.718	142.304	160.434	113.038	155.984	0.0297229	0.0660768	1.37993	0.000214648
3561	YHR132W-A	IGO2	Protein required for initiation of G0 program; prevents degradation of nutrient-regulated mRNAs via the 5'-3' mRNA decay pathway; phosphorylated by Rim15p; GFP protein localizes to the cytoplasm and nucleus; similar to Igo1p	63	DRQYFDSGDYALK	15.0073	0	0	510246	19091	24728	eb04472_JV297_phos	eb04472.raw	U	R.QYFDS#GDYALK.K	0	0	3	3	253.292	218.553	260.333	214.309	333.227	301.227	296.36	375.044	236.622	326.465	0.0995463	0.111132	1.37969	0.00598451
2459	YDR293C	SSD1	Translational repressor with a role in cell wall polar growth and integrity; regulated by Cbk1p phosphorylation to effect bud-specific translational control of specific mRNAs; interacts with TOR pathway components	487	STINNDSDSLSSP	20.1669	0	0	510247	6877	9877	eb04473_JV297_phos	eb04473.raw	U	R.SSTINNDS#DSLSS#PTK.S	1	1	4	3	84.6419	90.6929	83.6443	93.9864	128.447	125.997	103.178	129.157	88.2414	121.695	0.0559421	0.102047	1.37911	0.00243621
34	YJL020C	BBC1	Protein possibly involved in assembly of actin patches; interacts with an actin assembly factor Las17p and with the SH3 domains of Type I myosins Myo3p and Myo5p; localized predominantly to cortical actin patches	103	DLPEPISPETKKE	33.6572	0	0	510246	17283	22471	eb04472_JV297_phos	eb04472.raw	U	K.DLPEPIS#PETK.K	0	0	5	5	428.479	458.283	452.877	453.529	691.076	575.537	598.349	607.208	448.292	618.043	0.0299502	0.0816834	1.37866	0.000631725
251	YGR270W	YTA7	Protein that localizes to chromatin and has a role in regulation of histone gene expression; has a bromodomain-like region that interacts with the N-terminal tail of histone H3, and an ATPase domain; potentially phosphorylated by Cdc28p	94	DDVDLVSPHENAR	1000	0	0	510246	5587	7805	eb04472_JV297_phos	eb04472.raw	U	K.GDDEDDDVDLVS#PHENAR.T	0	0	1	1	11.9739	14.5281	8.96301	8.58699	19.9051	9.3483	15.3883	16.0797	11.013	15.1803	0.253419	0.287614	1.3784	0.158866
2030	YML115C	VAN1	Component of the mannan polymerase I, which contains Van1p and Mnn9p and is involved in the first steps of mannan synthesis; mutants are vanadate-resistant	29	PISRNGSSNNIKD	9.34047	0	1	510246	1996	3286	eb04472_JV297_phos	eb04472.raw	U	R.NGS#SNNIK.D	0	0	2	2	163.596	143.03	135.663	115.199	178.634	221.893	180.775	187.02	139.372	192.081	0.143396	0.105116	1.37819	0.00996152
3541	YNR014W	YNR014W	Putative protein of unknown function; expression is cell-cycle regulated, Azf1p-dependent, and heat-inducible	136	NFQRRASEPQLPS	42.8692	0	0	510246	9959	13338	eb04472_JV297_phos	eb04472.raw	U	R.RAS#EPQLPSFDNR.S	0	0	1	1	55.8663	67.2228	66.7073	66.5524	102.163	75.0383	96.6344	79.3225	64.0872	88.2896	0.0856351	0.148848	1.37765	0.014517
2615	YGR261C	APL6	Beta3-like subunit of the yeast AP-3 complex; functions in transport of alkaline phosphatase to the vacuole via the alternate pathway; exists in both cytosolic and peripherally associated membrane-bound pools	712	RSFTSSSNAKLTG	6.59058	-5	0	510246	4311	6212	eb04472_JV297_phos	eb04472.raw	U	R.SFTSSS#NAK.L	0	0	3	3	257.236	195.672	189.306	162.447	273.291	303.999	249.478	281.516	201.165	277.071	0.199128	0.0812538	1.37733	0.0163302
724	YDR028C	REG1	Regulatory subunit of type 1 protein phosphatase Glc7p, involved in negative regulation of glucose-repressible genes	776	LGKSGSTNSLYDL	2.80603	0	15	510247	20263	26911	eb04473_JV297_phos	eb04473.raw	U	K.SGS#T#NSLYDLAQPSLSSATPQQK.N	1	1	3	2	56.2367	53.41	60.0865	72.9045	87.487	76.3643	96.2386	73.7853	60.6594	83.4688	0.141936	0.124401	1.37602	0.0148216
340	YLR079W	SIC1	Inhibitor of Cdc28-Clb kinase complexes that controls G1/S phase transition, preventing premature S phase and ensuring genomic integrity; phosphorylation targets Sic1p for SCF(CDC4)-dependent turnover; functional homolog of mammalian Kip1	191	KNWNNNSPKNDAR	1000	0	0	510246	3581	5294	eb04472_JV297_phos	eb04472.raw	U	K.NWNNNS#PK.N	0	0	2	2	68.0314	71.9252	72.5369	72.9959	107.09	95.2731	96.4365	93.9272	71.3724	98.1817	0.0318065	0.061383	1.37563	0.000162933
2020	YPL030W	TRM44	tRNA(Ser) Um(44) 2'-O-methyltransferase; involved in maintaining levels of the tRNA-Ser species tS(CGA) and tS(UGA); conserved among metazoans and fungi but there does not appear to be a homolog in plants; TRM44 is a non-essential gene	107	IDNGNESGEEDVK	1000	0	0	510246	14429	18916	eb04472_JV297_phos	eb04472.raw	U	K.KFEIDNGNES#GEEDVK.K	0	0	2	2	90.5332	74.2712	89.2449	81.9228	119.175	119.897	108.089	114.48	83.993	115.41	0.0894006	0.0471323	1.37405	0.000504678
1614	YKR084C	HBS1	GTPase with similarity to translation release factors; together with binding partner Dom34p, facilitates ribosomal subunit dissociation and peptidyl-tRNA release when translation is stalled; genetically implicated in mRNA no-go decay	124	WLDEEESEGERNG	1000	0	0	510246	21807	28050	eb04472_JV297_phos	eb04472.raw	U	R.LPDWLDEEES#EGERNGEEANDEK.T	0	0	4	4	365.455	331.59	304.669	317.104	405.933	458.173	451.22	494.928	329.705	452.564	0.0796162	0.0807091	1.37263	0.00156842
2476	YDR216W	ADR1	Carbon source-responsive zinc-finger transcription factor, required for transcription of the glucose-repressed gene ADH2, of peroxisomal protein genes, and of genes required for ethanol, glycerol, and fatty acid utilization	302	LNRSDSSGSTMNL	0	-3	8	510246	5923	8226	eb04472_JV297_phos	eb04472.raw	U	R.SDSS#GSTM*NLDYK.L	0	0	1	1	28.3215	39.5552	33.0934	28.5318	38.4738	48.9559	43.3569	46.9455	32.3755	44.433	0.162732	0.103493	1.37243	0.0136598
2390	YDL099W	BUG1	Cis-golgi localized protein involved in ER to Golgi transport; forms a complex with the mammalian GRASP65 homolog, Grh1p; mutants are compromised for the fusion of ER-derived vesicles with Golgi membranes	62	GTPGEESTQEETV	7.71046	-21	5	510246	15906	20746	eb04472_JV297_phos	eb04472.raw	U	K.NSSATGSIGSETPDLEGTPGEES#TQEETVK.A	0	0	3	3	58.1248	62.4888	76.2949	66.9838	97.0851	77.3456	82.6687	105.014	65.9731	90.5283	0.117833	0.140939	1.3722	0.0166756
2150	YER155C	BEM2	Rho GTPase activating protein (RhoGAP) involved in the control of cytoskeleton organization and cellular morphogenesis; required for bud emergence	283	YGNDGSSLKNDDS	6.59058	-6	0	510246	12613	16668	eb04472_JV297_phos	eb04472.raw	U	R.FYGNDGSS#LK.N	0	0	2	2	201.047	184.658	182.133	186.208	271.42	276.962	240.312	245.874	188.512	258.642	0.045217	0.0705149	1.37202	0.000434422
953	YLL013C	PUF3	Protein of the mitochondrial outer surface, links the Arp2/3 complex with the mitochore during anterograde mitochondrial movement; also binds to and promotes degradation of mRNAs for select nuclear-encoded mitochondrial proteins	203	TQSQFISKSVSNA	31.7689	0	0	510247	13059	17722	eb04473_JV297_phos	eb04473.raw	U	R.ELESQDRPDAVNTQSQFIS#K.S	0	0	1	1	33.8066	29.7716	35.3315	31.7732	28.3644	47.6299	47.0431	56.2064	32.6707	44.811	0.0740964	0.261923	1.37159	0.0891486
3401	YER169W	RPH1	JmjC domain-containing histone demethylase; specifically demethylates H3K36 tri- and dimethyl modification states; associates with actively transcribed (RNA polymerase II) regions in vivo and specifically targets H3K36 in its trimethylation state as its substrate; transcriptional repressor of PHR1; Rph1p phosphorylation during DNA damage is under control of the MEC1-RAD53 pathway	689	DKEQGSSPLNSKF	9.34047	-1	4	510247	3001	4776	eb04473_JV297_phos	eb04473.raw	U	K.EQGSS#PLNSK.F	0	0	1	1	55.0297	49.7386	55.1834	51.7441	73.8335	90.5658	72.0429	53.5587	52.924	72.5002	0.0500846	0.208747	1.36989	0.0435944
471	YHR158C	KEL1	Protein required for proper cell fusion and cell morphology; functions in a complex with Kel2p to negatively regulate mitotic exit, interacts with Tem1p and Lte1p; localizes to regions of polarized growth; potential Cdc28p substrate	613	NQIKNNSPILETL	30.6121	0	0	510246	21624	27835	eb04472_JV297_phos	eb04472.raw	U	K.NNS#PILETLPSNEIK.T	0	0	1	1	61.0287	55.8717	62.7202	68.9573	92.1931	79.3346	78.6856	90.2398	62.1445	85.1132	0.0868242	0.0833861	1.3696	0.00210987
1750	YPL150W	YPL150W	Putative protein kinase of unknown cellular role; binds phosphatidylinositols and cardiolipin in a large-scale study	533	RTESIGSLNENVA	7.97117	-5	0	510246	21924	28185	eb04472_JV297_phos	eb04472.raw	U	R.TESIGS#LNENVAGAIVPR.S	0	0	1	1	27.7957	28.4882	28.2527	26.4275	37.6023	32.8583	45.4474	36.0161	27.741	37.981	0.0332232	0.140963	1.36913	0.00929109
2928	YNL315C	ATP11	Molecular chaperone, required for the assembly of alpha and beta subunits into the F1 sector of mitochondrial F1F0 ATP synthase	109	LMTKSRSPLDPSA	11.0148	-2	5	510246	4650	6638	eb04472_JV297_phos	eb04472.raw	U	K.SRS#PLDPSAPK.V	0	0	1	1	23.0635	31.7178	23.7452	26.885	35.534	32.9644	34.6607	41.1544	26.3529	36.0784	0.149693	0.0983466	1.36905	0.0105043
3588	YJL057C	IKS1	Putative serine/threonine kinase; expression is induced during mild heat stress; deletion mutants are hypersensitive to copper sulphate and resistant to sorbate; interacts with an N-terminal fragment of Sst2p	295	KVFNRFSDTESPE	4.08456	0	4	510246	9297	12502	eb04472_JV297_phos	eb04472.raw	U	K.VFNRFS#DTESPEER.K	0	0	1	1	13.7783	19.5567	17.4472	17.3178	27.7602	21.5475	21.8083	22.0763	17.025	23.2981	0.1407	0.128017	1.36846	0.0168287
363	YKR028W	SAP190	Protein that forms a complex with the Sit4p protein phosphatase and is required for its function; member of a family of similar proteins including Sap4p, Sap155p, and Sap185p	857	NDDDYDSDDGKSK	3.11889	-13	0	510246	8292	11238	eb04472_JV297_phos	eb04472.raw	U	K.NYYNNVETNDDDYDS#DDGK.S	0	0	7	3	78.5713	75.1023	89.7654	81.8705	115.909	93.9869	109.623	125.397	81.3274	111.229	0.0770648	0.118652	1.36767	0.0064054
1921	YNL307C	MCK1	Protein serine/threonine/tyrosine (dual-specificity) kinase involved in control of chromosome segregation and in regulating entry into meiosis; related to mammalian glycogen synthase kinases of the GSK-3 family	24	IADDVTSNKSNNT	0	-9	0	510246	14700	19252	eb04472_JV297_phos	eb04472.raw	U	R.GSEFIADDVTS#NK.S	0	0	2	2	165.997	169.13	157.16	173.06	237.803	217.875	218.739	234.558	166.337	227.244	0.0406763	0.0458104	1.36617	6.45592e-05
1862	YML123C	PHO84	High-affinity inorganic phosphate (Pi) transporter and low-affinity manganese transporter; regulated by Pho4p and Spt7p; mutation confers resistance to arsenate; exit from the ER during maturation requires Pho86p	579	NDIESSSPSQLQH	4.08456	-2	0	510246	6992	9577	eb04472_JV297_phos	eb04472.raw	U	K.NNDIESSS#PS#QLQHEA.-	1	0	2	1	29.5046	37.0725	30.6366	30.1786	40.2052	49.5924	41.6622	42.5689	31.8481	43.5072	0.110331	0.0958929	1.36608	0.00523459
2630	YGR184C	UBR1	E3 ubiquitin ligase (N-recognin), forms heterodimer with Rad6p to ubiquitinate substrates in the N-end rule pathway; regulates peptide transport via Cup9p ubiquitination; mutation in human UBR1 causes Johansson-Blizzard Syndrome (JBS)	286	DYMFDGTTTAKTS	4.69102	-9	2	510246	11110	14774	eb04472_JV297_phos	eb04472.raw	U	K.YENDYM*FDGT#TTAK.T	0	0	4	3	96.4484	128.049	110.107	110.428	161.042	160.247	126.372	160.156	111.258	151.954	0.116417	0.112267	1.36578	0.0089686
1821	YKR067W	GPT2	Glycerol-3-phosphate/dihydroxyacetone phosphate dual substrate-specific sn-1 acyltransferase located in lipid particles and the ER; involved in the stepwise acylation of glycerol-3-phosphate and dihydroxyacetone in lipid biosynthesis	693	KSEGETSEDEDEF	6.59058	-5	0	510247	5813	8476	eb04473_JV297_phos	eb04473.raw	U	K.SEGETS#EDEDEFDEK.N	0	0	1	1	45.8641	48.7707	40.9217	53.0381	69.7084	58.5827	63.2602	65.9751	47.1486	64.3816	0.107968	0.0727423	1.3655	0.00249503
3170	YER120W	SCS2	Integral ER membrane protein that regulates phospholipid metabolism via an interaction with the FFAT motif of Opi1p, also involved in telomeric silencing, disruption causes inositol auxotrophy above 34 degrees C, VAP homolog	153	EPVVQDSEPKEVP	58.4333	0	0	510247	9493	13200	eb04473_JV297_phos	eb04473.raw	U	K.ETVEPVVQDS#EPK.E	0	0	1	1	48.0748	55.6718	50.6238	50.3979	73.8219	68.0636	66.8846	70.8232	51.1921	69.8983	0.0625289	0.0442488	1.36541	0.000154526
1789	YMR039C	SUB1	Transcriptional coactivator, facilitates elongation through factors that modify RNAP II; role in peroxide resistance involving Rad2p; role in the hyperosmotic stress response through polymerase recruitment at RNAP II and RNAP III genes	119	KMVRLLSDDEYED	14.0618	0	0	510246	12983	17123	eb04472_JV297_phos	eb04472.raw	U	R.LLS#DDEYEDDNNNDSTNNDK.D	0	0	5	4	187.328	182.848	221.14	215.171	280.739	272.48	289.78	258.17	201.622	275.292	0.0958875	0.048764	1.36539	0.000771165
1620	YCR073W-A	SOL2	Protein with a possible role in tRNA export; shows similarity to 6-phosphogluconolactonase non-catalytic domains but does not exhibit this enzymatic activity; homologous to Sol1p, Sol3p, and Sol4p	64	SCKSTASAAEGKS	11.0148	-3	0	510246	1522	2672	eb04472_JV297_phos	eb04472.raw	U	K.STAS#AAEGK.S	0	0	4	4	350.004	359.226	352.222	361.804	510.06	492.476	467.326	473.251	355.814	485.778	0.0157472	0.0399853	1.36526	1.36046e-05
1742	YER164W	CHD1	Nucleosome remodeling factor that functions in regulation of transcription elongation; contains a chromo domain, a helicase domain and a DNA-binding domain; component of both the SAGA and SLIK complexes	1339	TRLSPNSPTPPLK	2.80603	-3	2	510246	17840	23171	eb04472_JV297_phos	eb04472.raw	U	R.LSPNS#PTPPLK.S	0	0	2	2	112.282	125.988	117.498	128.008	178.634	171.279	148.193	162.32	120.944	165.107	0.0608035	0.0793517	1.36515	0.00107317
1974	YHR027C	RPN1	Non-ATPase base subunit of the 19S regulatory particle of the 26S proteasome; may participate in the recognition of several ligands of the proteasome; contains a leucine-rich repeat (LRR) domain, a site for protein-protein interactions	19	DEQSQISPEKQTP	15.0073	0	0	510246	6984	9567	eb04472_JV297_phos	eb04472.raw	U	K.QQTIDEQSQIS#PEK.Q	0	0	1	1	47.8956	51.2745	48.6876	44.6079	68.5812	61.6457	59.5987	72.7697	48.1164	65.6488	0.0571159	0.0930456	1.36438	0.00194765
509	YGR250C	YGR250C	Putative RNA binding protein; localizes to stress granules induced by glucose deprivation; interacts with Rbg1p in a two-hybrid	651	SDDDDQSQTDNSS	11.0148	-8	6	510246	1908	3175	eb04472_JV297_phos	eb04472.raw	U	R.GNLSSSDDDDQS#QTDNSSK.F	0	0	1	1	22.6213	18.2732	24.5676	23.4084	28.2017	36.3324	32.6939	24.0107	22.2176	30.3097	0.123704	0.176727	1.36422	0.0361407
1556	YER166W	DNF1	Aminophospholipid translocase (flippase) that localizes primarily to the plasma membrane; contributes to endocytosis, protein transport and cell polarity; type 4 P-type ATPase	365	ADYGRPSLDYDNL	7.97117	-7	3	510247	19629	26154	eb04473_JV297_phos	eb04473.raw	U	R.VSADYGRPS#LDYDNLEQGAGEANIVDR.S	0	0	1	1	41.4187	43.0794	41.057	37.9553	50.8724	58.3573	41.0931	72.6972	40.8776	55.755	0.052302	0.238981	1.36395	0.0696307
748	YAR014C	BUD14	Protein involved in bud-site selection, Bud14p-Glc7p complex is a cortical regulator of dynein; inhibitor of the actin assembly factor Bnr1p (formin); diploid mutants display a random budding pattern instead of the wild-type bipolar pattern	658	RAVSSASINSSLS	23.6238	0	0	510246	7076	9689	eb04472_JV297_phos	eb04472.raw	U	R.AVSSAS#INSSLSGSR.A	0	0	3	3	152.434	113.416	101.987	98.7046	153.082	152.928	163.296	167.023	116.635	159.082	0.21164	0.0451407	1.36393	0.0163626
797	YLR220W	CCC1	Putative vacuolar Fe2+/Mn2+ transporter; suppresses respiratory deficit of yfh1 mutants, which lack the ortholog of mammalian frataxin, by preventing mitochondrial iron accumulation	32	LGGSESTPLLRGS	0	-12	0	510246	10995	14630	eb04472_JV297_phos	eb04472.raw	U	K.GSGGTSELGGSEST#PLLR.G	0	0	1	1	22.693	19.6514	25.8064	24.7154	30.2701	32.3942	31.4445	32.5463	23.2165	31.6638	0.116478	0.0331369	1.36385	0.00112656
2838	YDL006W	PTC1	Type 2C protein phosphatase (PP2C); dephosphorylates Hog1p, inactivating osmosensing MAPK cascade; involved in Fus3p activation during pheromone response; deletion affects precursor tRNA splicing, mitochondrial inheritance, and sporulation	133	DSVSDDSMDLAQH	15.0073	0	0	510247	17176	23014	eb04473_JV297_phos	eb04473.raw	U	R.WELPDSVSDDS#M*DLAQHQR.K	1	0	2	1	24.4139	32.4963	21.7257	32.5835	46.9448	32.7522	36.1823	35.7864	27.8048	37.9164	0.200568	0.163805	1.36366	0.0516688
2811	YNL118C	DCP2	Catalytic subunit of the Dcp1p-Dcp2p decapping enzyme complex, which removes the 5' cap structure from mRNAs prior to their degradation; member of the Nudix hydrolase family	728	DSSSNVSSSKDLL	11.7212	-5	2	510246	5858	8144	eb04472_JV297_phos	eb04472.raw	U	K.AFDSSSNVS#SSK.D	1	1	2	1	65.964	67.349	66.7281	52.7505	104.452	80.939	83.5965	75.5746	63.1979	86.1406	0.110572	0.146917	1.36303	0.0192209
3976	YDL149W	ATG9	Transmembrane protein involved in forming Cvt and autophagic vesicles; cycles between the phagophore assembly site (PAS) and other cytosolic punctate structures, not found in autophagosomes; may be involved in membrane delivery to the PAS	787	DGEDTHSMDEDSL	20.1669	0	0	510247	8981	12548	eb04473_JV297_phos	eb04473.raw	U	K.NIDGEDTHS#MDEDSLTK.K	0	0	1	1	20.6735	22.1551	21.8402	26.5844	41.0767	22.6481	32.2239	28.4115	22.8133	31.09	0.113687	0.248772	1.3628	0.0887615
3094	YOR070C	GYP1	Cis-golgi GTPase-activating protein (GAP) for the Rab family members Ypt1p (in vivo) and for Ypt1p, Sec4p, Ypt7p, and Ypt51p (in vitro); involved in vesicle docking and fusion	539	RVASFVTPTKDFQ	31.2747	0	0	510246	16800	21865	eb04472_JV297_phos	eb04472.raw	U	R.VASFVT#PTK.D	0	0	3	3	232.846	224.833	208.429	224.32	357.187	292.224	265.312	297.438	222.607	303.04	0.0459394	0.127857	1.36132	0.00700354
3247	YKL146W	AVT3	Vacuolar transporter, exports large neutral amino acids from the vacuole; member of a family of seven S. cerevisiae genes (AVT1-7) related to vesicular GABA-glycine transporters	121	IRNPSNSLQLQGG	0	-2	9	510246	10019	13415	eb04472_JV297_phos	eb04472.raw	U	R.NPSNS#LQLQGGDITR.D	0	0	1	1	16.7181	14.0126	15.7607	18.3895	24.5298	16.7474	23.2927	23.648	16.2202	22.0545	0.112774	0.162148	1.35969	0.0271586
593	YIR003W	AIM21	Protein of unknown function involved in mitochondrial migration along actin filament; may interact with ribosomes; GFP-fusion protein colocalizes with Sac1p to the actin cytoskeleton	119	NVSRKKSPTSVEE	17.0091	0	0	510246	4111	5966	eb04472_JV297_phos	eb04472.raw	U	K.S#PTSVEEGK.V	0	0	4	4	149.339	173.559	156.265	157.912	258.01	186.966	202.893	217.668	159.269	216.384	0.064202	0.140728	1.35861	0.0119827
491	YGR162W	TIF4631	Translation initiation factor eIF4G, subunit of the mRNA cap-binding protein complex (eIF4F) that also contains eIF4E (Cdc33p); interacts with Pab1p and with eIF4A (Tif1p); also has a role in biogenesis of the large ribosomal subunit	905	RDAPPASKDSFIT	15.0073	0	0	510246	11101	14764	eb04472_JV297_phos	eb04472.raw	U	R.DAPPAS#KDSFITTR.T	0	0	1	1	148.252	101.192	84.9664	92.8623	150.363	175.934	120.224	133.885	106.818	145.101	0.265926	0.165163	1.3584	0.0850345
3138	YDR479C	PEX29	Peroxisomal integral membrane peroxin, involved in the regulation of peroxisomal size, number and distribution; genetic interactions suggest that Pex28p and Pex29p act at steps upstream of those mediated by Pex30p, Pex31p, and Pex32p	73	GGGFPSTSNIQKM	6.59058	-17	1	510246	16056	20934	eb04472_JV297_phos	eb04472.raw	U	R.GSLPSSSGQPTSGGGFPST#SNIQK.M	0	0	2	1	16.5866	18.0839	8.00529	11.5669	21.834	20.5795	12.37	18.8483	13.5607	18.408	0.341805	0.228559	1.35745	0.172428
1961	YJL201W	ECM25	Non-essential protein of unknown function; promoter contains a consensus binding sequence for factor Abf1p	413	RSVTSPTYTPVAL	0	-5	9	510247	21217	28034	eb04473_JV297_phos	eb04473.raw	U	R.SVTSPT#YTPVALQNTPVLK.P	0	0	1	1	22.3824	32.5489	25.7856	23.8789	26.819	40.4165	35.4524	39.22	26.1489	35.477	0.17164	0.173278	1.35673	0.0497194
33	YJL020C	BBC1	Protein possibly involved in assembly of actin patches; interacts with an actin assembly factor Las17p and with the SH3 domains of Type I myosins Myo3p and Myo5p; localized predominantly to cortical actin patches	158	RKVPMDSPKLKAR	1000	0	0	510246	3896	5692	eb04472_JV297_phos	eb04472.raw	U	K.VPM*DS#PK.L	0	0	15	15	1243.76	1216.9	1191.25	1246.43	1805.99	1545.35	1564.4	1724.19	1224.58	1659.98	0.0211652	0.0759773	1.35555	0.000510141
310	YIL115C	NUP159	Nucleoporin, subunit of the Nup82 subcomplex of the nuclear pore; part of the nuclear pore that is found exclusively on the cytoplasmic side; required for mRNA export; regulates ADP release from the ATP-dependent RNA helicase Dbp5p	55	SLFVAASGSKAVV	0	-6	2	510246	22445	28798	eb04472_JV297_phos	eb04472.raw	U	K.SLFVAAS#GSK.A	0	0	1	1	101.718	126.945	115.749	169.256	301.167	95.6046	150.333	148.103	128.417	173.802	0.226735	0.509756	1.35342	0.367989
3453	YDR457W	TOM1	E3 ubiquitin ligase of the hect-domain class; has a role in mRNA export from the nucleus and may regulate transcriptional coactivators; involved in degradation of excess histones	2406	MFGRIGSSADVIR	9.34047	0	1	510246	9926	13299	eb04472_JV297_phos	eb04472.raw	U	R.IGS#SADVIR.A	0	0	2	2	260.737	270.343	243.438	200.742	337.631	371.519	288.728	321.255	243.815	329.783	0.126316	0.104481	1.3526	0.00984713
3008	YNL098C	RAS2	GTP-binding protein that regulates the nitrogen starvation response, sporulation, and filamentous growth; farnesylation and palmitoylation required for activity and localization to plasma membrane; homolog of mammalian Ras proto-oncogenes	238	RNASIESKTGLAG	1000	0	0	510246	3428	5106	eb04472_JV297_phos	eb04472.raw	U	R.NAS#IES#K.T	1	1	4	2	176.944	150.71	178.511	157.062	202.723	196.699	188.395	308.706	165.807	224.131	0.0845659	0.252927	1.35176	0.0927469
3527	YEL060C	PRB1	Vacuolar proteinase B (yscB), a serine protease of the subtilisin family; involved in protein degradation in the vacuole and required for full protein degradation during sporulation; activity inhibited by Pbi2p	60	DEEPSDSEDKEHG	4.08456	-2	0	510246	1314	2408	eb04472_JV297_phos	eb04472.raw	U	K.DDDEEPSDS#EDK.E	0	0	1	1	54.2171	71.6622	46.5327	47.5095	80.3523	68.952	65.3631	82.5263	54.9804	74.2984	0.211601	0.113349	1.35136	0.0360467
4037	YBR198C	TAF5	Subunit (90 kDa) of TFIID and SAGA complexes, involved in RNA polymerase II transcription initiation and in chromatin modification	411	DGEKKDSNLSSPA	15.0073	0	0	510247	1794	3187	eb04473_JV297_phos	eb04473.raw	U	K.KDS#NLSSPAR.D	1	1	3	1	69.788	71.3677	62.6994	62.4746	93.053	91.6399	77.5723	97.3124	66.5824	89.8944	0.0699774	0.0952367	1.35012	0.00305213
4006	YAL053W	FLC2	Putative FAD transporter; required for uptake of FAD into endoplasmic reticulum; involved in cell wall maintenance	643	GKNKNDSELFELR	1000	0	0	510247	18250	24409	eb04473_JV297_phos	eb04473.raw	U	K.NDS#ELFELR.K	0	0	1	1	106.176	119.255	109.513	157.977	237.989	113.797	176.668	136.786	123.23	166.31	0.193296	0.327032	1.34959	0.196951
3638	YLR436C	ECM30	Putative protein of unknown function; may play a role in cell wall biosynthesis, mutants have abormal relative levels of mannose and glucose and have Gap1p sorting and transport defects; (GFP)-fusion protein localizes to the cytoplasm	1109	SSSSSSSITLEKT	6.59058	-6	2	510246	9887	13247	eb04472_JV297_phos	eb04472.raw	U	R.SSSSSSS#ITLEK.T	0	0	2	2	88.5615	91.808	85.8721	80.9425	133.107	121.183	111.083	102.874	86.796	117.062	0.0529453	0.111543	1.3487	0.00470438
2919	YJL141C	YAK1	Serine-threonine protein kinase; component of a glucose-sensing system that inhibits growth in response to glucose availability; upon nutrient deprivation Yak1p phosphorylates Pop2p to regulate mRNA deadenylation, the co-repressor Crf1p to inhibit transcription of ribosomal genes, and the stress-responsive transcription factors Hsf1p and Msn2p; nuclear localization negatively regulated by the Ras…	128	YRRRKSSLVVPPA	1000	0	0	510246	8431	11416	eb04472_JV297_phos	eb04472.raw	U	R.RKS#S#LVVPPAR.A	1	1	2	1	68.2464	72.4407	62.2414	58.5405	101.094	82.1457	88.4455	80.8821	65.3673	88.1418	0.0945929	0.104908	1.34841	0.00639467
255	YGR270W	YTA7	Protein that localizes to chromatin and has a role in regulation of histone gene expression; has a bromodomain-like region that interacts with the N-terminal tail of histone H3, and an ATPase domain; potentially phosphorylated by Cdc28p	941	ELQKVTSNAAPTN	10.4676	-1	15	510246	18215	23633	eb04472_JV297_phos	eb04472.raw	U	K.VTS#NAAPTNFDENGEPLSEK.V	0	0	1	1	13.8023	12.9186	9.22326	13.5928	15.4197	14.0158	19.1364	18.2075	12.3842	16.6949	0.172863	0.142807	1.34808	0.0360234
1983	YER093C	TSC11	Subunit of TORC2 (Tor2p-Lst8p-Avo1-Avo2-Tsc11p-Bit61p), a membrane-associated complex that regulates actin cytoskeletal dynamics during polarized growth and cell wall integrity; involved in sphingolipid metabolism; contains a RasGEFN domain	265	ENHSTLSIPDLDG	20.1669	0	0	510246	17292	22482	eb04472_JV297_phos	eb04472.raw	U	R.NNENHSTLS#IPDLDGSNK.V	1	1	5	2	54.8864	55.8191	54.2881	51.3259	76.9012	66.6315	69.4328	78.585	54.0799	72.8876	0.0358925	0.0790697	1.34778	0.000821675
2389	YML028W	TSA1	Thioredoxin peroxidase, acts as both a ribosome-associated and free cytoplasmic antioxidant; self-associates to form a high-molecular weight chaperone complex under oxidative stress; deletion results in mutator phenotype	174	VLPCNWTPGAATI	9.91096	-7	13	510246	21970	28239	eb04472_JV297_phos	eb04472.raw	U	K.NGTVLPCNWT#PGAATIKPTVEDSK.E	0	0	1	1	40.7973	46.7088	48.7917	41.5495	43.2845	56.9252	67.033	72.407	44.4618	59.9124	0.0877893	0.213799	1.3475	0.0604628
330	YGL197W	MDS3	Putative component of the TOR regulatory pathway; negative regulator of early meiotic gene expression; required, with Pmd1p, for growth under alkaline conditions; has an N-terminal kelch-like domain	757	LSRRRSSLMSIPS	17.0091	0	0	510247	20166	26795	eb04473_JV297_phos	eb04473.raw	U	R.RSS#LMSIPSGELLR.S	0	0	2	2	35.0135	39.0608	36.8618	38.269	39.7404	60.3197	47.7606	53.1839	37.3013	50.2512	0.0476041	0.172973	1.34717	0.0266519
3275	YOR227W	HER1	Protein of unknown function required for proliferation or remodeling of the ER that is caused by overexpression of Hmg2p; may interact with ribosomes, based on co-purification experiments	219	ISTPTSTPTTASS	6.03896	-5	6	510246	7338	10028	eb04472_JV297_phos	eb04472.raw	U	K.ISTPTST#PTTASSK.P	0	0	2	2	89.9357	83.2553	72.922	83.0206	108.38	119.817	116.105	98.9929	82.2834	110.824	0.0852685	0.0831448	1.34685	0.00263398
2746	YFR016C	YFR016C	Putative protein of unknown function; green fluorescent protein (GFP)-fusion protein localizes to the cytoplasm and bud; interacts with Spa2p; YFL016C is not an essential gene	180	GIEVGNSPITRRK	19.6069	0	0	510246	8218	11148	eb04472_JV297_phos	eb04472.raw	U	K.ESTGIEVGNS#PITR.R	0	0	1	1	26.3259	22.1972	24.5468	30.5707	37.7534	33.4682	37.444	30.8416	25.9101	34.8768	0.136524	0.0952856	1.34607	0.0101497
2019	YER159C	BUR6	Subunit of a heterodimeric NC2 transcription regulator complex with Ncb2p; complex binds to TBP and can repress transcription by preventing preinitiation complex assembly or stimulate activated transcription; homologous to human NC2alpha	141	TQPEEESAxxxxx	14.6691	0	0	510247	7076	10128	eb04473_JV297_phos	eb04473.raw	U	R.EGLCVEEGQTQPEEES#A.-	0	0	2	2	78.643	66.0656	77.7523	68.8789	100.896	93.8012	104.341	93.0688	72.8349	98.0269	0.0866122	0.0560422	1.34588	0.000945308
3864	YDR395W	SXM1	Nuclear transport factor (karyopherin) involved in protein transport between the cytoplasm and nucleoplasm; similar to Nmd5p, Cse1p, Lph2p, and the human cellular apoptosis susceptibility protein, CAS1	869	AVTEGKSLEGDLT	11.7212	0	13	510247	21409	28264	eb04473_JV297_phos	eb04473.raw	U	K.S#LEGDLTPEEEEEYFIECDDDMK.E	0	0	1	1	110.287	73.8925	90.0153	84.21	83.908	130.359	165.634	102.088	89.6011	120.497	0.170953	0.295838	1.34482	0.162353
175	YKL054C	DEF1	RNAPII degradation factor, forms a complex with Rad26p in chromatin, enables ubiquitination and proteolysis of RNAPII present in an elongation complex; mutant is deficient in Zip1p loading onto chromosomes during meiosis	295	VNEQETSAQEQEE	9.34047	-1	12	510246	14501	19004	eb04472_JV297_phos	eb04472.raw	U	K.VNEQETS#AQEQEEETAEPSEENEDRVPEVDGEEVQEEAEK.K	0	0	4	2	35.6469	33.9586	29.9183	35.9948	44.5046	42.2861	45.3979	49.9075	33.8796	45.524	0.0822492	0.0703315	1.3437	0.00153373
2052	YLL029W	FRA1	Protein involved in negative regulation of transcription of iron regulon; forms an iron independent complex with Fra2p, Grx3p, and Grx4p; cytosolic; mutant fails to repress transcription of iron regulon and is defective in spore formation	14	SDGRAHSISHVPG	4.08456	0	7	510246	689	1565	eb04472_JV297_phos	eb04472.raw	U	R.AHS#ISHVPGTHM*R.G	0	0	1	1	28.5605	25.269	23.4329	25.5257	36.1382	31.1212	33.5474	37.1888	25.697	34.4989	0.0826679	0.0789174	1.34253	0.00222642
3764	YJL044C	GYP6	GTPase-activating protein (GAP) for the yeast Rab family member, Ypt6p; involved in vesicle mediated protein transport	436	IDPNRQSLENKLR	22.5294	0	0	510246	13978	18357	eb04472_JV297_phos	eb04472.raw	U	K.LTIDPNRQS#LENK.L	0	0	1	1	84.0444	82.056	96.9796	90.0262	104.255	125.705	119.049	124.974	88.2765	118.496	0.0761062	0.0839764	1.34232	0.00237137
64	YPL085W	SEC16	COPII vesicle coat protein required for ER transport vesicle budding; Sec16p is bound to the periphery of ER membranes and may act to stabilize initial COPII complexes; interacts with Sec23p, Sec24p and Sec31p	370	ADERSYSEETSED	2.80603	-2	4	510246	9584	12865	eb04472_JV297_phos	eb04472.raw	U	R.SYS#EETSEDIFHGHDK.Q	0	0	1	1	37.7142	53.8834	32.6562	33.3677	64.0262	46.0652	46.0783	55.3964	39.4054	52.8915	0.251427	0.163107	1.34224	0.0858691
2592	YFR019W	FAB1	1-phosphatidylinositol-3-phosphate 5-kinase; vacuolar membrane kinase that generates phosphatidylinositol (3,5)P2, which is involved in vacuolar sorting and homeostasis	186	YARTPDSDHDDVG	10.0949	-3	11	510247	10502	14477	eb04473_JV297_phos	eb04473.raw	U	R.TPDS#DHDDVGDEVSSIK.S	0	0	1	1	40.4866	57.0394	56.7345	69.4148	83.3038	77.266	78.0176	61.5986	55.9188	75.0465	0.212153	0.124712	1.34206	0.044579
47	YPL085W	SEC16	COPII vesicle coat protein required for ER transport vesicle budding; Sec16p is bound to the periphery of ER membranes and may act to stabilize initial COPII complexes; interacts with Sec23p, Sec24p and Sec31p	663	RFGSGNSFSSLDK	20.1669	0	0	510246	19346	25070	eb04472_JV297_phos	eb04472.raw	U	R.FGSGNS#FSSLDK.P	1	1	6	5	546.055	466.204	511.422	468.899	639.53	757.504	610.682	666.389	498.145	668.526	0.0764167	0.0950305	1.34203	0.00368801
479	YHR158C	KEL1	Protein required for proper cell fusion and cell morphology; functions in a complex with Kel2p to negatively regulate mitotic exit, interacts with Tem1p and Lte1p; localizes to regions of polarized growth; potential Cdc28p substrate	707	NESSELSQNNTEI	6.03896	-7	4	510246	6153	8518	eb04472_JV297_phos	eb04472.raw	U	K.HYNESSELS#QNNTEIDK.L	0	0	2	1	24.9994	19.2832	25.0985	23.1862	32.6406	28.814	22.0681	40.6949	23.1418	31.0544	0.117471	0.250283	1.34192	0.102993
632	YKR048C	NAP1	Protein that interacts with mitotic cyclin Clb2p; required for the regulation of microtubule dynamics during mitosis; controls bud morphogenesis; involved in the transport of H2A and H2B histones to the nucleus; phosphorylated by CK2	76	IQDRLGSLVGQDS	18.9783	0	0	510246	22627	29014	eb04472_JV297_phos	eb04472.raw	U	R.LGS#LVGQDSGYVGGLPK.N	0	0	2	1	77.3046	66.7178	75.181	75.7407	97.8636	96.2146	82.7553	118.542	73.736	98.844	0.064613	0.149461	1.34051	0.0177975
329	YGL197W	MDS3	Putative component of the TOR regulatory pathway; negative regulator of early meiotic gene expression; required, with Pmd1p, for growth under alkaline conditions; has an N-terminal kelch-like domain	698	VSPKPVSKSNSIY	34.8923	0	0	510247	8272	11639	eb04473_JV297_phos	eb04473.raw	U	R.NNDEEDDEDPVSPKPVS#K.S	0	0	1	1	19.3112	22.597	20.5389	19.788	23.484	28.9333	30.356	27.3234	20.5588	27.5242	0.0705164	0.107712	1.3388	0.00555352
2606	YFR014C	CMK1	Calmodulin-dependent protein kinase; may play a role in stress response, many CA++/calmodulan dependent phosphorylation substrates demonstrated in vitro, amino acid sequence similar to Cmk2p and mammalian Cam Kinase II	418	INRVCSSDSDLPG	6.59058	-1	7	510247	13813	18688	eb04473_JV297_phos	eb04473.raw	U	R.VCSS#DSDLPGSDIK.S	0	0	5	4	171.578	158.484	198.727	186.862	203.873	250.468	286.353	217.39	178.913	239.521	0.0982474	0.153846	1.33876	0.024989
697	YMR219W	ESC1	Protein localized to the nuclear periphery, involved in telomeric silencing; interacts with PAD4-domain of Sir4p	888	ISFSTDSPDNFQE	3.7006	-8	16	510246	20866	26952	eb04472_JV297_phos	eb04472.raw	U	K.TQISFSTDS#PDNFQESNDNTEFSSTK.Y	0	0	1	1	28.8951	42.1221	36.3101	29.4206	40.9721	51.7007	41.9467	48.2149	34.187	45.7086	0.183603	0.112107	1.33702	0.0294182
3975	YOR093C	YOR093C	Putative protein of unknown function; deletion causes sensitivity to unfolded protein response-inducing agents	751	KAIDISSLSGETS	0	-1	9	510247	19830	26398	eb04473_JV297_phos	eb04473.raw	U	K.AIDISS#LSGETSSGYK.R	0	0	1	1	16.7061	14.3598	17.1557	17.9843	16.7793	23.4172	20.126	28.1576	16.5515	22.12	0.0938935	0.219363	1.33644	0.0714836
349	YDL195W	SEC31	Component of the Sec13p-Sec31p complex of the COPII vesicle coat, required for vesicle formation in ER to Golgi transport; mutant has increased aneuploidy tolerance	473	AFDNDESDAQDDA	1000	0	0	510246	13134	17309	eb04472_JV297_phos	eb04472.raw	U	K.EALAFDNDES#DAQDDANNEK.E	0	0	3	3	106.988	108.367	109.576	125.812	160.856	155.858	123.354	162.127	112.686	150.549	0.0782214	0.12176	1.33601	0.00981715
82	YDR122W	KIN1	Serine/threonine protein kinase involved in regulation of exocytosis; localizes to the cytoplasmic face of the plasma membrane; closely related to Kin2p	521	NQQQRQSHENIEK	1000	0	0	510246	1616	2798	eb04472_JV297_phos	eb04472.raw	U	R.QS#HENIEK.L	0	0	2	2	193.411	153.887	161.834	150.501	212.658	241.796	194.023	231.971	164.908	220.112	0.118772	0.0962679	1.33476	0.00869711
131	YDL019C	OSH2	Member of an oxysterol-binding protein family with seven members in S. cerevisiae; family members have overlapping, redundant functions in sterol metabolism and collectively perform a function essential for viability	521	SGSGVASPIDKVP	18.8054	0	0	510247	5176	7627	eb04473_JV297_phos	eb04473.raw	U	R.SM*QSGSGVAS#PIDK.V	0	0	1	1	32.7311	31.6126	46.0538	48.4636	57.7746	48.2001	56.5309	49.5327	39.7153	53.0096	0.221015	0.0913356	1.33474	0.0379076
2340	YPR163C	TIF3	Translation initiation factor eIF-4B, has RNA annealing activity; contains an RNA recognition motif and binds to single-stranded RNA	387	VYDVLRTEDDDED	25.8266	0	0	510247	15047	20274	eb04473_JV297_phos	eb04473.raw	U	K.SVYDVLRT#EDDDEDEEAEK.Q	0	0	2	2	60.5267	73.7873	64.084	58.4098	86.813	82.8485	74.5787	98.4005	64.202	85.6602	0.106003	0.115636	1.33423	0.0117698
3095	YOR070C	GYP1	Cis-golgi GTPase-activating protein (GAP) for the Rab family members Ypt1p (in vivo) and for Ypt1p, Sec4p, Ypt7p, and Ypt51p (in vitro); involved in vesicle docking and fusion	91	RTSNSYSPLRYVN	9.34047	-5	0	510246	2923	4463	eb04472_JV297_phos	eb04472.raw	U	R.TSNSYS#PLR.Y	0	0	1	1	59.989	56.1558	54.5484	60.0828	80.3755	73.9908	80.6277	72.5642	57.694	76.8895	0.0482363	0.0547873	1.33271	0.000269376
365	YPL249C	GYP5	GTPase-activating protein (GAP) for yeast Rab family members; involved in ER to Golgi trafficking; exhibits GAP activity toward Ypt1p that is stimulated by Gyl1p, also acts on Sec4p; interacts with Gyl1p, Rvs161p and Rvs167p; involved in recruiting Rvs167p to the bud tip during polarized growth	66	LNDKQQSLGHEAP	37.549	0	0	510246	1992	3281	eb04472_JV297_phos	eb04472.raw	U	K.QQS#LGHEAPTNVSR.E	0	0	1	1	35.1091	43.0373	31.9899	34.9884	64.8047	39.3557	43.0847	45.9904	36.2812	48.3089	0.130358	0.234482	1.33151	0.0977408
1910	YMR086W	YMR086W	Component of the eisosome with unknown function; may interact with ribosomes, based on co-purification experiments; GFP-fusion protein localizes to the cell periphery; expression is repressed by cAMP; similar to A. gossypii SEG gene which is important for stabilizing eisosomes	85	RPGKINSLTQRSS	17.0091	0	0	510246	5323	7477	eb04472_JV297_phos	eb04472.raw	U	K.INS#LTQR.S	0	0	2	2	175.462	140.758	146.875	136.751	201.653	211.205	201.124	184.433	149.961	199.604	0.116714	0.0557327	1.33104	0.00303958
2040	YKL064W	MNR2	Vacuolar membrane protein required for magnesium homeostasis; putative magnesium transporter; has similarity to Alr1p and Alr2p, which mediate influx of Mg2+ and other divalent cations	93	IKSEDPSLKGAFI	20.1669	0	0	510247	3377	5263	eb04473_JV297_phos	eb04473.raw	U	K.SEDPS#LK.G	0	0	1	1	35.3959	45.6989	45.6687	39.2753	55.8225	51.9262	55.7145	57.4759	41.5097	55.2347	0.122221	0.0425167	1.33065	0.0026834
2559	YOR361C	PRT1	eIF3b subunit of the core complex of translation initiation factor 3 (eIF3), essential for translation; part of a subcomplex (Prt1p-Rpg1p-Nip1p) that stimulates binding of mRNA and tRNA(i)Met to ribosomes	61	VDDIDFSDLEEQY	38.1333	0	0	510246	24545	31307	eb04472_JV297_phos	eb04472.raw	U	K.LEDIPVDDIDFS#DLEEQYK.V	0	0	3	1	14.9614	13.8548	19.9664	16.8864	14.3391	20.553	22.5381	29.9228	16.4173	21.8382	0.163071	0.294086	1.3302	0.170196
1032	YER123W	YCK3	Palmitoylated, vacuolar membrane-localized casein kinase I isoform; negatively regulates vacuole fusion during hypertonic stress via phosphorylation of Vps41p; shares essential functions with Hrr25p; regulates vesicle fusion in AP-3 pathway	380	SKTRNTTPVATPK	9.34047	-1	4	510246	4199	6075	eb04472_JV297_phos	eb04472.raw	U	R.NTT#PVATPK.Q	0	0	2	2	99.8184	89.8513	108.712	122.74	135.001	145.144	137.876	142.094	105.28	140.029	0.132583	0.0320278	1.33005	0.00319089
19	YMR261C	TPS3	Regulatory subunit of trehalose-6-phosphate synthase/phosphatase complex, which synthesizes the storage carbohydrate trehalose; expression is induced by stress conditions and repressed by the Ras-cAMP pathway	55	ERSSSVTSASSHY	0	-4	6	510246	20647	26694	eb04472_JV297_phos	eb04472.raw	U	R.SSSVT#SASSHYIGLPQEAQINGEPLQR.A	1	1	2	1	30.4127	33.2748	19.6124	29.0677	32.0131	40.9204	29.6509	46.7158	28.0919	37.325	0.210699	0.212214	1.32868	0.111059
21	YML100W	TSL1	Large subunit of trehalose 6-phosphate synthase (Tps1p)/phosphatase (Tps2p) complex, which converts uridine-5'-diphosphoglucose and glucose 6-phosphate to trehalose, similar to Tps3p and may share function; mutant has aneuploidy tolerance	56	NNISQESLVAPAP	8.59442	-7	15	510246	21673	27893	eb04472_JV297_phos	eb04472.raw	U	R.ALSNNISQES#LVAPAPEQGVPPAISR.S	0	0	2	2	48.9592	69.2952	68.4041	73.4795	88.8233	91.547	79.0814	86.1292	65.0345	86.3952	0.168264	0.0619722	1.32845	0.0127212
3717	YGR280C	PXR1	Essential protein involved in rRNA and snoRNA maturation; competes with TLC1 RNA for binding to Est2p, suggesting a role in negative regulation of telomerase; human homolog inhibits telomerase; contains a G-patch RNA interacting domain	230	KLKSSESASNIPD	24.2431	0	0	510247	4422	6654	eb04473_JV297_phos	eb04473.raw	U	K.SSES#ASNIPDAVNTR.L	0	0	2	2	116.56	94.2592	85.7888	100.809	155.615	128.237	137.48	106.61	99.3543	131.986	0.130993	0.154442	1.32843	0.0356459
597	YIR003W	AIM21	Protein of unknown function involved in mitochondrial migration along actin filament; may interact with ribosomes; GFP-fusion protein colocalizes with Sac1p to the actin cytoskeleton	183	NEVTEHSDSEDLT	15.0073	0	0	510246	4352	6264	eb04472_JV297_phos	eb04472.raw	U	K.SNNEVTEHS#DSEDLTEK.Q	1	1	4	2	17.0168	30.3186	24.5051	32.9625	38.0787	33.5478	33.0279	34.529	26.2008	34.7959	0.269789	0.0653918	1.32805	0.0598653
2073	YJR059W	PTK2	Putative serine/threonine protein kinase involved in regulation of ion transport across plasma membrane; enhances spermine uptake	104	SVSSHKSSVALQD	0	0	1	510246	22521	28888	eb04472_JV297_phos	eb04472.raw	U	K.S#SVALQDLIK.H	0	0	2	2	293.767	238.089	200.049	156.134	290.57	323.942	235.921	326.708	222.01	294.285	0.263023	0.143512	1.32555	0.0916845
1916	YMR086W	YMR086W	Component of the eisosome with unknown function; may interact with ribosomes, based on co-purification experiments; GFP-fusion protein localizes to the cell periphery; expression is repressed by cAMP; similar to A. gossypii SEG gene which is important for stabilizing eisosomes	449	LENDTTSSPTQDL	0	-2	3	510246	11800	15645	eb04472_JV297_phos	eb04472.raw	U	K.NLENDTTS#SPTQDLDEK.S	0	0	1	1	17.7218	18.3679	19.7686	20.1801	29.5264	23.5895	17.2809	30.3943	19.0096	25.1978	0.0608654	0.241405	1.32553	0.0925824
1182	YPL195W	APL5	Delta adaptin-like subunit of the clathrin associated protein complex (AP-3); functions in transport of alkaline phosphatase to the vacuole via the alternate pathway, suppressor of loss of casein kinase 1 function	918	KTKAKNSPEPNEF	1000	0	0	510246	10188	13623	eb04472_JV297_phos	eb04472.raw	U	K.NS#PEPNEFLR.D	0	0	5	5	212.889	203.604	218.495	209.329	337.7	259.153	256.207	265.883	211.079	279.736	0.0296135	0.138897	1.32526	0.0129964
1020	YIL135C	VHS2	Cytoplasmic protein of unknown function; identified as a high-copy suppressor of the synthetic lethality of a sis2 sit4 double mutant, suggesting a role in G1/S phase progression; similar to Mlf3p	303	ALSRSPSNQQYLL	11.0148	-2	4	510247	12838	17443	eb04473_JV297_phos	eb04473.raw	U	R.SPS#NQQYLLK.Q	0	0	3	3	246.839	231.408	202.527	183.816	295.927	261.487	269.715	318.68	216.148	286.452	0.131012	0.0908501	1.32526	0.01063
2308	YBR001C	NTH2	Putative neutral trehalase, required for thermotolerance and may mediate resistance to other cellular stresses	112	TLKRRGSEDDSFL	36.5564	0	0	510246	3066	4643	eb04472_JV297_phos	eb04472.raw	U	R.RGS#EDDSFLSSQGNR.R	0	0	1	1	41.4665	41.2174	39.7662	42.386	61.2839	47.789	52.5354	56.69	41.209	54.5746	0.0263356	0.105628	1.32434	0.00386287
3032	YNR051C	BRE5	Ubiquitin protease cofactor, forms deubiquitination complex with Ubp3p that coregulates anterograde and retrograde transport between the endoplasmic reticulum and Golgi compartments; null is sensitive to brefeldin A	340	ASTPSSSPEPVAN	6.59058	-10	0	510247	5057	7469	eb04473_JV297_phos	eb04473.raw	U	K.ESGNNASTPSSS#PEPVANPPK.M	1	0	3	1	9.40465	13.697	12.0027	14.5077	21.6481	14.4401	19.0993	10.4579	12.403	16.4113	0.181808	0.302584	1.32317	0.191984
1666	YHR146W	CRP1	Protein that binds to cruciform DNA structures	332	VEPVEGSLQSKLV	1000	0	0	510247	11264	15445	eb04473_JV297_phos	eb04473.raw	U	K.VEPVEGS#LQS#K.L	1	1	3	2	201.919	214.871	201.173	190.796	266.098	268.488	258.731	275.688	202.19	267.251	0.048773	0.0261605	1.32178	3.79994e-05
4011	YJL049W	YJL049W	Putative protein of unknown function; YJL049W is a non-essential gene	409	LHEPKESSSEDLL	0	0	2	510247	10508	14486	eb04473_JV297_phos	eb04473.raw	U	K.ES#SSEDLLK.R	0	0	2	2	125.332	148.563	119.465	110.677	183.596	167.421	143.95	170.795	126.009	166.44	0.128541	0.0993361	1.32086	0.0129255
3674	YOR368W	RAD17	Checkpoint protein, involved in the activation of the DNA damage and meiotic pachytene checkpoints; with Mec3p and Ddc1p, forms a clamp that is loaded onto partial duplex DNA; homolog of human and S. pombe Rad1 and U. maydis Rec1 proteins	357	DKGNETSNDNLLQ	6.59058	-1	0	510246	17948	23302	eb04472_JV297_phos	eb04472.raw	U	K.GNETS#NDNLLQLNGK.K	0	0	2	1	67.9477	58.5017	60.3468	38.5042	80.9798	82.3446	70.6698	63.4846	56.3251	74.3697	0.223066	0.120134	1.32037	0.0577746
1869	YPR148C	YPR148C	Protein of unknown function that may interact with ribosomes, based on co-purification experiments; green fluorescent protein (GFP)-fusion protein localizes to the cytoplasm in a punctate pattern	328	EDEKPKSEGAEEE	16.1979	0	0	510246	2680	4147	eb04472_JV297_phos	eb04472.raw	U	K.PKS#EGAEEESK.K	0	0	1	1	29.0983	25.7424	32.4584	35.8902	53.4171	44.2221	34.401	30.6119	30.7973	40.663	0.141703	0.252226	1.32034	0.127081
3995	YKL178C	STE3	Receptor for a factor pheromone, couples to MAP kinase cascade to mediate pheromone response; transcribed in alpha cells and required for mating by alpha cells, ligand bound receptors endocytosed and recycled to the plasma membrane; GPCR	430	KVTLDYSEKLHNS	17.0091	0	0	510247	13273	17997	eb04473_JV297_phos	eb04473.raw	U	K.VTLDYS#EK.L	0	0	1	1	10.6355	15.1804	11.4614	15.3703	26.1682	13.1672	19.3219	10.8205	13.1619	17.3695	0.187268	0.395783	1.31968	0.29304
24	YDR001C	NTH1	Neutral trehalase, degrades trehalose; required for thermotolerance and may mediate resistance to other cellular stresses; may be phosphorylated by Cdc28p	58	KINRTRTMSVFDN	0	0	8	510246	23232	29724	eb04472_JV297_phos	eb04472.raw	U	R.T#MSVFDNVSPFK.K	0	0	1	1	75.2731	77.5008	89.9008	78.4984	117.722	92.2896	97.8591	115.943	80.2933	105.953	0.0815183	0.120684	1.31958	0.0117466
1034	YBR095C	RXT2	Subunit of the histone deacetylase Rpd3L complex; possibly involved in cell fusion and invasive growth	249	PEDRGASDEDDIN	1000	0	0	510246	2788	4293	eb04472_JV297_phos	eb04472.raw	U	R.GAS#DEDDINNK.N	0	0	2	2	41.7653	44.952	58.1815	50.4502	62.5505	64.7353	67.6886	62.6746	48.8372	64.4122	0.147194	0.0373084	1.31892	0.00628825
159	YBL056W	PTC3	Type 2C protein phosphatase (PP2C); dephosphorylates Hog1p (see also Ptc2p) to limit maximal kinase activity induced by osmotic stress; dephosphorylates T169 phosphorylated Cdc28p (see also Ptc2p); role in DNA damage checkpoint inactivation	332	FDFHDFSDDDNEV	8.07025	-8	11	510247	22808	29960	eb04473_JV297_phos	eb04473.raw	U	K.SIFDFHDFS#DDDNEVFAITTK.K	0	0	1	1	11.8664	13.5392	14.574	4.0517	2.59126	26.3344	4.7006	24.446	11.0078	14.518	0.433302	0.868377	1.31888	0.621137
1665	YHR146W	CRP1	Protein that binds to cruciform DNA structures	394	RKSPAVSEEKEKK	1000	0	0	510246	3103	4694	eb04472_JV297_phos	eb04472.raw	U	K.S#PAVS#EEK.E	1	1	5	2	86.9243	89.1991	119.236	99.9201	135.408	125.241	126.013	134.356	98.8199	130.254	0.149194	0.0412263	1.3181	0.00706453
118	YLR330W	CHS5	Component of the exomer complex, which also contains Csh6p, Bch1p, Bch2p, and Bud7p and is involved in export of selected proteins, such as chitin synthase Chs3p, from the Golgi to the plasma membrane	318	SPNDNESNPSEAK	18.6027	0	0	510246	14683	19231	eb04472_JV297_phos	eb04472.raw	U	K.MPEDTTDVEQVASPNDNES#NPSEAK.E	0	0	8	6	107.084	103.012	100.019	104.874	150.13	135.119	130.602	130.366	103.747	136.555	0.0288312	0.068185	1.31623	0.000532542
1928	YIL156W	UBP7	Ubiquitin-specific protease that cleaves ubiquitin-protein fusions	925	GKRSSSSTPFSTG	0	-3	16	510246	8723	11782	eb04472_JV297_phos	eb04472.raw	U	R.SSSS#TPFSTGGNDSNNSSDYK.N	0	0	2	1	44.3823	38.6505	39.0895	36.0863	47.9209	55.2279	49.9872	54.937	39.5521	52.0182	0.0880317	0.0699628	1.31518	0.00257762
2044	YML017W	PSP2	Asn rich cytoplasmic protein that contains RGG motifs; high-copy suppressor of group II intron-splicing defects of a mutation in MRS2 and of a conditional mutation in POL1 (DNA polymerase alpha); possible role in mitochondrial mRNA splicing	340	PLSKLDSPALELQ	75.7382	0	0	510246	20429	26436	eb04472_JV297_phos	eb04472.raw	U	K.LDS#PALELQSK.P	0	0	3	3	114.887	113.574	123.338	137.941	140.37	167.739	169.11	165.972	122.435	160.798	0.0915271	0.0850705	1.31333	0.00488123
160	YBL056W	PTC3	Type 2C protein phosphatase (PP2C); dephosphorylates Hog1p (see also Ptc2p) to limit maximal kinase activity induced by osmotic stress; dephosphorylates T169 phosphorylated Cdc28p (see also Ptc2p); role in DNA damage checkpoint inactivation	371	DTELGSSATPSKL	7.71046	-5	4	510246	19600	25401	eb04472_JV297_phos	eb04472.raw	U	K.DNDDM*EIDDLDTELGSS#ATPSK.L	0	0	2	2	101.456	106.483	94.3562	92.6009	138.998	116.701	125.296	137.56	98.724	129.639	0.0651847	0.0817062	1.31314	0.00248012
689	YMR219W	ESC1	Protein localized to the nuclear periphery, involved in telomeric silencing; interacts with PAD4-domain of Sir4p	341	VIEKYESDEHKVH	20.1669	0	0	510247	1010	2128	eb04473_JV297_phos	eb04473.raw	U	K.YES#DEHK.V	0	0	1	1	108.41	102.254	103.85	101.645	134.188	131.964	141.179	139.132	104.04	136.615	0.0293951	0.0312531	1.3131	1.67527e-05
3450	YNR039C	ZRG17	Endoplasmic reticulum protein of unknown function, transcription is induced under conditions of zinc deficiency; mutant phenotype suggests a role in uptake of zinc	66	RPSSLFYSAKEGN	17.0091	0	0	510247	19267	25708	eb04473_JV297_phos	eb04473.raw	U	R.PSSLFY#SAK.E	0	0	1	1	44.5018	32.8645	38.9646	33.8513	40.7049	54.8831	45.2247	56.1701	37.5456	49.2457	0.142573	0.152339	1.31163	0.0441352
3406	YGR083C	GCD2	Delta subunit of the translation initiation factor eIF2B, the guanine-nucleotide exchange factor for eIF2; activity subsequently regulated by phosphorylated eIF2; first identified as a negative regulator of GCN4 expression	21	SKAKQATPTTTAA	6.03896	0	4	510246	2532	3964	eb04472_JV297_phos	eb04472.raw	U	K.QAT#PTTTAAANGEK.K	0	0	1	1	31.8109	34.6424	26.9098	32.7665	47.1888	39.7137	39.8809	38.5792	31.5324	41.3406	0.104607	0.0953403	1.31105	0.00879378
3290	YJL193W	YJL193W	Putative protein of unknown function, predicted to encode a triose phosphate transporter subfamily member based on phylogenetic analysis; similar to YOR307C/SLY41; deletion mutant has a respiratory growth defect	247	GFSRQESPLPLYE	49.5899	0	0	510246	16960	22071	eb04472_JV297_phos	eb04472.raw	U	R.QES#PLPLYEK.L	0	0	2	2	108.518	97.6361	99.5508	110.768	149.003	118.452	137.319	140.897	104.118	136.418	0.0623573	0.0948295	1.31022	0.00426918
698	YMR219W	ESC1	Protein localized to the nuclear periphery, involved in telomeric silencing; interacts with PAD4-domain of Sir4p	937	KLDEEESEDSYEQ	3.69567	0	19	510246	18669	24200	eb04472_JV297_phos	eb04472.raw	U	K.LDEEES#EDSYEQDYADPEPGNDEGSNENIVK.G	1	0	2	1	37.3199	38.3244	42.9933	36.4653	55.9154	50.8654	40.586	55.8437	38.7757	50.8026	0.0751134	0.141915	1.31017	0.021294
2742	YFR016C	YFR016C	Putative protein of unknown function; green fluorescent protein (GFP)-fusion protein localizes to the cytoplasm and bud; interacts with Spa2p; YFL016C is not an essential gene	1072	ENPKKASADDIFK	1000	0	0	510247	14829	19999	eb04473_JV297_phos	eb04473.raw	U	K.KAS#ADDIFK.D	0	0	1	1	121.95	128.902	107.285	133.968	189.801	132.865	157.977	163.251	123.026	160.974	0.0942284	0.145037	1.30845	0.0269253
2682	YLR096W	KIN2	Serine/threonine protein kinase involved in regulation of exocytosis; localizes to the cytoplasmic face of the plasma membrane; closely related to Kin1p	151	PSPKNESEILERQ	1000	0	0	510247	4823	7175	eb04473_JV297_phos	eb04473.raw	U	K.NES#EILER.Q	0	0	1	1	32.6235	34.9369	38.1735	44.242	55.4506	43.2143	49.4676	48.0819	37.494	49.0536	0.134468	0.102697	1.30831	0.0176024
2070	YJR059W	PTK2	Putative serine/threonine protein kinase involved in regulation of ion transport across plasma membrane; enhances spermine uptake	730	LNSTPTTPTHNGP	11.0148	-8	7	510247	16589	22257	eb04473_JV297_phos	eb04473.raw	U	K.SMLNSTPTT#PTHNGPTPLPAK.A	1	1	6	3	89.5414	96.5736	102.965	119.316	141.381	130.982	140.993	120.815	102.099	133.543	0.124586	0.0730481	1.30797	0.00777409
2669	YJL014W	CCT3	Subunit of the cytosolic chaperonin Cct ring complex, related to Tcp1p, required for the assembly of actin and tubulins in vivo	257	EYKKGESQTNIEI	11.0148	0	2	510247	10409	14362	eb04473_JV297_phos	eb04473.raw	U	K.KGES#QTNIEIEK.E	0	0	2	1	83.4827	87.8525	90.8585	92.431	128.494	116.661	103.574	114.976	88.6562	115.926	0.0444125	0.0879656	1.30759	0.00247844
3917	YNL148C	ALF1	Alpha-tubulin folding protein, similar to mammalian cofactor B; Alf1p-GFP localizes to cytoplasmic microtubules; required for the folding of alpha-tubulin and may play an additional role in microtubule maintenance	250	VHDDVESDDEIxx	48.0443	0	0	510247	10521	14502	eb04473_JV297_phos	eb04473.raw	U	K.DEESAEVEDVHDDVES#DDEI.-	0	0	1	1	22.1553	34.7896	19.7374	33.5376	43.1799	33.5345	33.498	33.7916	27.555	36.001	0.27986	0.132989	1.30651	0.11207
4048	YDR333C	YDR333C	Putative protein of unknown function	119	AAKDKGSDDDDDD	1000	0	0	510247	6554	9450	eb04473_JV297_phos	eb04473.raw	U	K.DKGS#DDDDDDEEFDK.I	0	0	1	1	44.6811	32.3174	42.1813	40.7915	51.0118	51.6212	46.6968	59.6642	39.9928	52.2485	0.134125	0.103504	1.30645	0.0181833
2344	YNL326C	PFA3	Palmitoyltransferase for Vac8p, required for vacuolar membrane fusion; contains an Asp-His-His-Cys-cysteine rich (DHHC-CRD) domain; autoacylates; required for vacuolar integrity under stress conditions	322	RVTPRPSLEADRA	1000	0	0	510246	2740	4230	eb04472_JV297_phos	eb04472.raw	U	R.RVT#PRPS#LEADR.A	1	1	2	1	43.5458	47.6556	68.3729	64.3305	77.9586	78.8307	61.6026	73.6402	55.9762	73.008	0.21812	0.108687	1.30427	0.0579003
28	YAR042W	SWH1	Protein similar to mammalian oxysterol-binding protein; contains ankyrin repeats; localizes to the Golgi and the nucleus-vacuole junction	500	ITPGPHSRKSTVS	16.144	0	0	510247	5403	7923	eb04473_JV297_phos	eb04473.raw	U	R.SQSLSEITPGPHS#R.K	1	1	3	2	46.6528	51.0851	53.6323	48.5289	70.9517	62.0435	56.3825	71.3431	49.9748	65.1802	0.0608436	0.111527	1.30426	0.00836803
524	YNL298W	CLA4	Cdc42p-activated signal transducing kinase of the PAK (p21-activated kinase) family, along with Ste20p and Skm1p; involved in septin ring assembly, vacuole inheritance, cytokinesis, sterol uptake regulation; phosphorylates Cdc3p and Cdc10p	445	RYAQNSSPTAAHF	6.59058	-5	2	510247	2842	4568	eb04473_JV297_phos	eb04473.raw	U	R.YAQNSS#PTAAHFQPQR.T	0	0	1	1	39.0765	37.9562	40.4116	41.4058	47.6536	54.8168	45.3361	59.2652	39.7125	51.7679	0.0380367	0.124091	1.30357	0.0106601
2050	YLL029W	FRA1	Protein involved in negative regulation of transcription of iron regulon; forms an iron independent complex with Fra2p, Grx3p, and Grx4p; cytosolic; mutant fails to repress transcription of iron regulon and is defective in spore formation	56	RQGRRASLFLRQL	1000	0	0	510247	9456	13154	eb04473_JV297_phos	eb04473.raw	U	R.RAS#LFLR.Q	0	0	1	1	67.3621	63.8669	67.8836	69.4801	97.7591	76.1257	77.8444	98.328	67.1482	87.5143	0.0352327	0.139184	1.3033	0.0167663
1015	YIL135C	VHS2	Cytoplasmic protein of unknown function; identified as a high-copy suppressor of the synthetic lethality of a sis2 sit4 double mutant, suggesting a role in G1/S phase progression; similar to Mlf3p	87	HNLSQRSSAVNLH	48.091	0	0	510246	12768	16856	eb04472_JV297_phos	eb04472.raw	U	R.NFHNLS#QRS#S#AVNLHLQPSR.T	1	1	4	2	175.211	177.178	151.559	146.319	245.67	193.397	192.428	215.577	162.567	211.768	0.0978122	0.118066	1.30265	0.0159849
1077	YOR229W	WTM2	Transcriptional modulator involved in regulation of meiosis, silencing, and expression of RNR genes; involved in response to replication stress; contains WD repeats	110	KTKSAATPNPEYG	22.0108	0	0	510246	18419	23888	eb04472_JV297_phos	eb04472.raw	U	K.SAAT#PNPEYGDAFQDVEGK.P	0	0	2	2	80.7701	93.081	86.0907	85.4124	112.819	119.048	108.151	109.729	86.3385	112.437	0.0588261	0.0428262	1.30228	0.000299673
1604	YHR066W	SSF1	Constituent of 66S pre-ribosomal particles, required for ribosomal large subunit maturation; functionally redundant with Ssf2p; member of the Brix family	301	KEREKETEEEDVE	1000	0	0	510247	9016	12592	eb04473_JV297_phos	eb04473.raw	U	R.EKET#EEEDVEMEEPK.P	0	0	1	1	57.0373	53.4311	62.7515	69.8069	96.1555	87.158	67.3175	65.8421	60.7567	79.1183	0.117688	0.188945	1.30222	0.0685646
639	YMR291W	TDA1	Putative kinase of unknown function; green fluorescent protein (GFP)-fusion protein localizes to the cytoplasm and nucleus; null mutant is sensitive to expression of the top1-T722A allele; not an essential gene	449	TLKKTLSMTSLKP	17.0091	0	0	510246	20036	25950	eb04472_JV297_phos	eb04472.raw	U	K.TLS#MTSLK.P	0	0	8	8	658.063	576.706	566.387	510.527	669.173	796.104	717.361	825.36	577.921	751.999	0.105248	0.0952358	1.30122	0.010025
2076	YGR240C	PFK1	Alpha subunit of heterooctameric phosphofructokinase involved in glycolysis, indispensable for anaerobic growth, activated by fructose-2,6-bisphosphate and AMP, mutation inhibits glucose induction of cell cycle-related genes	192	RASSDASDLLRQT	37.5398	0	0	510247	7694	10898	eb04473_JV297_phos	eb04473.raw	U	R.ASSDAS#DLLR.Q	1	1	5	4	184.245	207.917	176.189	189.842	257.011	253.041	232.061	244.025	189.548	246.534	0.0710487	0.0449166	1.30064	0.000612405
20	YMR261C	TPS3	Regulatory subunit of trehalose-6-phosphate synthase/phosphatase complex, which synthesizes the storage carbohydrate trehalose; expression is induced by stress conditions and repressed by the Ras-cAMP pathway	59	SVTSASSHYIGLP	0	0	2	510246	21192	27336	eb04472_JV297_phos	eb04472.raw	U	R.SSSVTSAS#S#HYIGLPQEAQINGEPLQR.A	1	1	2	1	17.925	18.4205	13.5746	14.6907	17.6159	23.8547	16.415	26.1144	16.1527	21	0.147667	0.224671	1.30009	0.11638
3173	YOR057W	SGT1	Cochaperone protein; regulates activity of adenylyl cyclase Cyr1p; involved in kinetochore complex assembly; associates with the SCF (Skp1p/Cdc53p/F box protein) ubiquitin ligase complex; acts as a linker between Skp1p and HSP90 complexes	307	LSAETASKERLSY	20.1669	0	0	510247	13158	17850	eb04473_JV297_phos	eb04473.raw	U	R.LLSAETAS#K.E	0	0	1	1	75.9542	71.2414	65.0625	65.8989	131.352	80.5545	84.0418	65.3102	69.5393	90.3147	0.0730159	0.316028	1.29876	0.201762
3116	YKL175W	ZRT3	Vacuolar membrane zinc transporter, transports zinc from storage in the vacuole to the cytoplasm when needed; transcription is induced under conditions of zinc deficiency	178	QMKKKMSLIDLLT	19.7769	0	0	510247	22290	29320	eb04473_JV297_phos	eb04473.raw	U	K.KMS#LIDLLTR.R	0	0	1	1	68.2943	53.0839	43.6387	42.0985	61.2606	78.7644	61.1697	67.7524	51.7788	67.2368	0.232407	0.123147	1.29854	0.0786649
1538	YMR173W	DDR48	DNA damage-responsive protein, expression is increased in response to heat-shock stress or treatments that produce DNA lesions; contains multiple repeats of the amino acid sequence NNNDSYGS	189	SNNDDSYGSNNDD	6.59058	-10	11	510247	2334	3899	eb04473_JV297_phos	eb04473.raw	U	K.SSYGSNNDDSY#GSNNDDSYGSSNK.K	0	0	2	2	26.4692	20.6297	14.8759	25.4473	33.2564	23.3641	30.1333	26.6826	21.8555	28.3591	0.242696	0.150835	1.29757	0.104875
48	YPL085W	SEC16	COPII vesicle coat protein required for ER transport vesicle budding; Sec16p is bound to the periphery of ER membranes and may act to stabilize initial COPII complexes; interacts with Sec23p, Sec24p and Sec31p	1511	THRIGDSLQGSPQ	20.1669	0	0	510247	3681	5676	eb04473_JV297_phos	eb04473.raw	U	R.IGDS#LQGSPQR.I	0	0	1	1	29.5524	25.6372	30.241	23.33	39.6591	34.0384	29.02	38.3011	27.1901	35.2547	0.120493	0.136063	1.2966	0.032141
648	YML010W	SPT5	Protein involved in regulating Pol I and Pol II transcription and pre-mRNA processing; forms a complex with Spt4p; contains a C-terminal repeat domain that is a target for phosphorylation by Sgv1p	136	EEDTKNSDGDTKD	11.0148	0	4	510246	749	1653	eb04472_JV297_phos	eb04472.raw	U	K.NS#DGDTK.D	0	0	1	1	11.7349	14.0126	13.2727	17.919	19.3589	18.3518	16.9964	19.1143	14.2348	18.4554	0.184967	0.0575988	1.29649	0.0248676
2939	YFL013C	IES1	Subunit of the INO80 chromatin remodeling complex	27	DETKADSPMQSVK	20.1669	0	0	510246	2409	3804	eb04472_JV297_phos	eb04472.raw	U	K.ADS#PM*QSVK.S	0	0	3	3	147.427	167.542	136.985	153.742	219.641	190.44	187.566	187.504	151.424	196.288	0.0843659	0.0796231	1.29628	0.00435207
40	YJL020C	BBC1	Protein possibly involved in assembly of actin patches; interacts with an actin assembly factor Las17p and with the SH3 domains of Type I myosins Myo3p and Myo5p; localized predominantly to cortical actin patches	895	SIRRSTTHDVGEI	6.59058	-2	7	510246	7311	9995	eb04472_JV297_phos	eb04472.raw	U	R.STT#HDVGEISNNVK.I	1	1	2	1	31.5002	35.0632	31.0218	37.4194	50.4076	34.7942	44.8907	44.8539	33.7511	43.7366	0.0900204	0.148791	1.29586	0.0319671
843	YGL139W	FLC3	Putative FAD transporter, similar to Flc1p and Flc2p; localized to the ER	639	DNSDYESNDTGVN	20.1669	0	0	510247	5298	7788	eb04473_JV297_phos	eb04473.raw	U	K.DHDDNSDYES#NDTGVNDELK.Q	1	1	4	1	17.1961	34.1795	31.4174	32.9495	41.9714	32.6063	33.7082	41.4687	28.9356	37.4387	0.273279	0.132707	1.29386	0.118453
3940	YOL045W	PSK2	One of two (see also PSK1) PAS domain containing S/T protein kinases; regulates sugar flux and translation in response to an unknown metabolite by phosphorylating Ugp1p and Gsy2p (sugar flux) and Caf20p, Tif11p and Sro9p (translation)	118	RHTRNLTETATLS	17.0091	0	0	510247	7347	10463	eb04473_JV297_phos	eb04473.raw	U	R.NLT#ETATLSASR.D	0	0	1	1	46.6887	42.1642	49.4891	47.0912	54.2538	62.2822	46.8947	76.4693	46.3583	59.975	0.065947	0.211172	1.29373	0.081571
1012	YIL135C	VHS2	Cytoplasmic protein of unknown function; identified as a high-copy suppressor of the synthetic lethality of a sis2 sit4 double mutant, suggesting a role in G1/S phase progression; similar to Mlf3p	159	VYSRRPSTIGLDR	1000	0	0	510246	4579	6550	eb04472_JV297_phos	eb04472.raw	U	R.RPS#T#IGLDR.A	1	1	4	3	244.82	227.958	148.592	121.812	280.844	230.393	193.219	256.852	185.796	240.327	0.322029	0.156292	1.2935	0.173578
2562	YAL041W	CDC24	Guanine nucleotide exchange factor (GEF or GDP-release factor) for Cdc42p; required for polarity establishment and maintenance, and mutants have morphological defects in bud formation and shmooing	526	EVVTKKSASSLIL	17.0091	0	0	510247	18877	25213	eb04473_JV297_phos	eb04473.raw	U	K.S#ASSLILK.K	0	0	3	3	173.144	150.646	142.211	129.602	209.485	197.547	170.162	192.823	148.901	192.504	0.123101	0.0855196	1.29284	0.0122247
2374	YGR192C	TDH3	Glyceraldehyde-3-phosphate dehydrogenase, isozyme 3, involved in glycolysis and gluconeogenesis; tetramer that catalyzes the reaction of glyceraldehyde-3-phosphate to 1,3 bis-phosphoglycerate; detected in the cytoplasm and cell wall	227	ELQGKLTGMAFRV	1000	0	0	510246	15918	20761	eb04472_JV297_phos	eb04472.raw	R	K.LT#GMAFR.V	0	0	1	1	96.7831	92.7969	140.795	135.405	179.308	168.402	140.771	113.416	116.445	150.474	0.21602	0.196403	1.29223	0.130031
4044	YJL129C	TRK1	Component of the Trk1p-Trk2p potassium transport system; 180 kDa high affinity potassium transporter; phosphorylated in vivo and interacts physically with the phosphatase Ppz1p, suggesting Trk1p acitivy is regulated by phosphorylation	592	PMERSRTIDMAEA	4.08456	-2	0	510247	2357	3932	eb04473_JV297_phos	eb04473.raw	U	R.SRT#IDM*AEAK.D	0	0	1	1	71.3893	78.5739	73.6612	62.553	101.547	94.1195	82.1863	91.9203	71.5443	92.4433	0.0936806	0.0863523	1.29211	0.00703792
2400	YHR119W	SET1	Histone methyltransferase, subunit of the COMPASS (Set1C) complex; COMPASS methylates histone H3K4; Set1p-dependent H3K4 trimethylation recruits Nrd1p, allowing efficient termination of snoRNAs and cryptic unstable transcripts (CUTs) by Nrd1p-Nab3p-Sen1p pathway; modulates histone acetylation levels in promoter proximal regions to ensure efficient Nrd1p-dependent termination; required in transcri…	655	LNEETDSKETTPL	0	-2	0	510246	17720	23019	eb04472_JV297_phos	eb04472.raw	U	K.PMAHLLNEETDS#K.E	0	0	1	1	48.7799	58.3544	52.4976	49.1432	72.4739	62.1496	66.3032	68.7921	52.1938	67.4297	0.0849711	0.0643302	1.29191	0.00267847
3871	YLR061W	RPL22A	Protein component of the large (60S) ribosomal subunit, has similarity to Rpl22Bp and to rat L22 ribosomal protein	23	VDVSSPTENGVFD	4.08456	-9	10	510247	21744	28661	eb04473_JV297_phos	eb04473.raw	U	K.TFTVDVSSPT#ENGVFDPASYAK.Y	0	0	1	1	35.3601	33.1906	34.3738	32.4528	48.0603	39.6739	44.433	42.714	33.8443	43.7203	0.0379211	0.0800322	1.29181	0.00183029
3911	YIL003W	CFD1	Highly conserved, iron-sulfur cluster binding protein localized in the cytoplasm; forms a complex with Nbp35p that is involved in iron-sulfur protein assembly in the cytosol	291	EQPQIESPKxxxx	1000	0	0	510247	2393	3978	eb04473_JV297_phos	eb04473.raw	U	K.HEQPQIES#PK.-	0	0	1	1	55.9499	61.8366	64.9584	56.1618	90.2061	75.6616	62.8272	79.5522	59.7267	77.0618	0.074121	0.146729	1.29024	0.0289843
623	YFL004W	VTC2	Subunit of the vacuolar transporter chaperone (VTC) complex involved in membrane trafficking, vacuolar polyphosphate accumulation, microautophagy and non-autophagic vacuolar fusion	657	KLMGVDSEEEEIE	1000	0	0	510246	22549	28920	eb04472_JV297_phos	eb04472.raw	U	K.LM*GVDS#EEEEIELPPGVK.K	0	0	9	8	290.146	287.07	288.19	271.163	384.692	362.025	331.528	387.182	284.142	366.357	0.0307789	0.0705066	1.28934	0.00094006
1530	YNL049C	SFB2	Component of the Sec23p-Sfb2p heterodimer of the COPII vesicle coat, required for cargo selection during vesicle formation in ER to Golgi transport; homologous to Sec24p and Sfb3p	53	NRANSFTQLAQNQ	0	-2	11	510246	20466	26480	eb04472_JV297_phos	eb04472.raw	U	R.ANSFT#QLAQNQQFPGSGK.V	0	0	1	1	45.2546	48.3815	57.0468	50.0842	60.9585	79.4141	52.5107	65.2497	50.1918	64.5333	0.0993887	0.174234	1.28573	0.0584974
1543	YLR310C	CDC25	Membrane bound guanine nucleotide exchange factor (GEF or GDP-release factor); indirectly regulates adenylate cyclase through activation of Ras1p and Ras2p by stimulating the exchange of GDP for GTP; required for progression through G1	609	LTPMRSSFSTVNE	4.54047	-1	13	510246	20907	27000	eb04472_JV297_phos	eb04472.raw	U	R.SS#FSTVNENDM*ENFSVLGPR.N	0	0	1	1	26.3856	22.092	25.3171	26.8589	20.9973	34.781	31.9146	41.6984	25.1634	32.3478	0.0853119	0.266156	1.28551	0.156497
528	YBL007C	SLA1	Cytoskeletal protein binding protein required for assembly of the cortical actin cytoskeleton; interacts with proteins regulating actin dynamics and proteins required for endocytosis; found in the nucleus and cell cortex; has 3 SH3 domains	834	PVKTGGTTVPAAP	0	-3	14	510246	22983	29431	eb04472_JV297_phos	eb04472.raw	U	K.TGGT#TVPAAPVSSAPVSSAPAPLDPFK.T	0	0	2	2	72.2617	61.9418	60.6903	57.1812	65.746	82.3579	83.3862	92.549	63.0187	81.0097	0.102875	0.137755	1.28549	0.0316603
1927	YIL156W	UBP7	Ubiquitin-specific protease that cleaves ubiquitin-protein fusions	197	QSSPVWTAPNLEP	2.36964	-14	0	510246	22193	28501	eb04472_JV297_phos	eb04472.raw	U	K.GTFTEDDAEQSSPVWT#APNLEPNDQLK.L	0	0	2	1	22.1792	30.9709	22.0796	21.9315	32.8497	35.9876	25.309	30.6844	24.2903	31.2077	0.183402	0.144032	1.28478	0.071457
2977	YLL040C	VPS13	Protein of unknown function; heterooligomeric or homooligomeric complex; peripherally associated with membranes; homologous to human COH1; involved in sporulation, vacuolar protein sorting and protein-Golgi retention	1364	GEIKSPSPDPASL	11.0148	-2	10	510246	4937	6996	eb04472_JV297_phos	eb04472.raw	U	K.SPS#PDPASLSSESER.T	0	0	2	2	82.0965	104.769	87.2566	97.5675	127.251	101.797	121.845	126.473	92.9223	119.341	0.109609	0.100026	1.28431	0.0150941
919	YLL021W	SPA2	Component of the polarisome, which functions in actin cytoskeletal organization during polarized growth; acts as a scaffold for Mkk1p and Mpk1p cell wall integrity signaling components; potential Cdc28p substrate	1180	EAEVHTSEEDIDE	11.2196	0	7	510247	4739	7070	eb04473_JV297_phos	eb04473.raw	U	K.SEAEVHT#S#EEDIDESNNVNGK.R	1	1	3	1	16.013	16.548	18.9046	17.7752	26.9933	23.51	23.404	14.9795	17.3102	22.2217	0.0747436	0.229865	1.28374	0.111572
2694	YER132C	PMD1	Protein with an N-terminal kelch-like domain, putative negative regulator of early meiotic gene expression; required, with Mds3p, for growth under alkaline conditions	989	SDARRISNSSLLR	31.2747	0	0	510247	5836	8506	eb04473_JV297_phos	eb04473.raw	U	R.RIS#NSSLLR.N	1	1	2	1	61.6022	67.4648	62.3143	70.2512	90.6825	74.5875	86.4663	83.9771	65.4081	83.9284	0.0634937	0.0811946	1.28315	0.00353499
521	YDR002W	YRB1	Ran GTPase binding protein; involved in nuclear protein import and RNA export, ubiquitin-mediated protein degradation during the cell cycle; shuttles between the nucleus and cytoplasm; is essential; homolog of human RanBP1	60	GDDAPESPDIHFE	1000	0	0	510246	21149	27287	eb04472_JV297_phos	eb04472.raw	U	K.KEGDDAPES#PDIHFEPVVHLEK.V	0	0	4	4	189.324	194.262	206.087	198.533	243.09	247.843	264.57	255.413	197.052	252.729	0.0360428	0.037131	1.28255	7.93272e-05
2464	YJL029C	VPS53	Component of the GARP (Golgi-associated retrograde protein) complex, Vps51p-Vps52p-Vps53p-Vps54p, which is required for the recycling of proteins from endosomes to the late Golgi; required for vacuolar protein sorting	790	VMKRIVSTPQIQQ	9.34047	0	1	510247	13535	18336	eb04473_JV297_phos	eb04473.raw	U	R.IVS#TPQIQQQK.E	0	0	4	4	244.856	262.179	224.856	201.343	283.191	322.616	296.064	293.956	233.309	298.957	0.112318	0.0560281	1.28138	0.00555116
2059	YBL058W	SHP1	UBX (ubiquitin regulatory X) domain-containing protein that regulates Glc7p phosphatase activity and interacts with Cdc48p; interacts with ubiquitylated proteins in vivo and is required for degradation of a ubiquitylated model substrate	315	QGQRLGSPIPGES	12.7898	0	7	510246	19995	25899	eb04472_JV297_phos	eb04472.raw	U	R.LGS#PIPGESSPAEVPK.N	1	1	5	3	161.373	184.31	180.895	161.689	247.215	197.494	217.564	219.421	172.067	220.424	0.0711703	0.0927067	1.28104	0.00665304
1533	YGR128C	UTP8	Nucleolar protein required for export of tRNAs from the nucleus; also copurifies with the small subunit (SSU) processome containing the U3 snoRNA that is involved in processing of pre-18S rRNA	148	TSNDHLSESDIDN	12.7898	-9	2	510247	11721	16025	eb04473_JV297_phos	eb04473.raw	U	K.ALEDTTDTSNDHLS#ESDIDNK.A	0	0	5	5	177.458	195.525	147.489	157.18	213.215	218.976	208.224	227.437	169.413	216.963	0.126455	0.0380231	1.28068	0.00606083
1013	YIL135C	VHS2	Cytoplasmic protein of unknown function; identified as a high-copy suppressor of the synthetic lethality of a sis2 sit4 double mutant, suggesting a role in G1/S phase progression; similar to Mlf3p	160	YSRRPSTIGLDRA	1000	0	0	510246	4579	6550	eb04472_JV297_phos	eb04472.raw	U	R.RPS#T#IGLDR.A	1	1	3	2	88.908	102.16	85.3308	79.5048	132.375	112.803	97.6117	112.957	88.9758	113.937	0.107958	0.125022	1.28053	0.027133
1014	YIL135C	VHS2	Cytoplasmic protein of unknown function; identified as a high-copy suppressor of the synthetic lethality of a sis2 sit4 double mutant, suggesting a role in G1/S phase progression; similar to Mlf3p	88	NLSQRSSAVNLHL	53.7748	0	0	510246	12768	16856	eb04472_JV297_phos	eb04472.raw	U	R.NFHNLS#QRS#S#AVNLHLQPSR.T	1	1	3	1	60.2639	47.8029	41.9419	42.8565	72.7528	53.1726	66.4269	54.405	48.2163	61.6893	0.174925	0.15391	1.27943	0.0780911
1076	YPL092W	SSU1	Plasma membrane sulfite pump involved in sulfite metabolism and required for efficient sulfite efflux; major facilitator superfamily protein	448	IESVEESNSALDF	11.7212	-14	7	510246	21989	28261	eb04472_JV297_phos	eb04472.raw	U	K.TTVSPYNSIESVEES#NSALDFTR.L	0	0	2	2	30.1618	32.328	41.234	36.5829	43.9004	38.4938	42.157	54.8886	35.0767	44.8599	0.139561	0.157272	1.27891	0.0629243
822	YDR207C	UME6	Key transcriptional regulator of early meiotic genes, binds URS1 upstream regulatory sequence, couples metabolic responses to nutritional cues with initiation and progression of meiosis, forms complex with Ime1p, and also with Sin3p-Rpd3p	318	KRGGSPSNDSQVQ	5.74962	-2	3	510246	2429	3829	eb04472_JV297_phos	eb04472.raw	U	R.GGSPS#NDSQVQHNVHDDQCAVGVAPR.N	0	0	1	1	10.1456	7.30088	11.6696	9.82864	11.3411	9.62676	17.5283	11.2679	9.73617	12.441	0.186062	0.279932	1.27781	0.217374
3511	YNL127W	FAR11	Protein involved in recovery from cell cycle arrest in response to pheromone, in a Far1p-independent pathway; interacts with Far3p, Far7p, Far8p, Far9p, and Far10p; has similarity to the N- and C-termini of N. crassa HAM-2	18	PIIRSVSLEDLKR	20.1669	0	0	510246	14723	19280	eb04472_JV297_phos	eb04472.raw	U	R.SVS#LEDLKR.N	0	0	4	4	312.493	312.644	273.45	313.51	467.693	349.918	377	353.5	303.024	387.028	0.0650814	0.142373	1.27722	0.0284012
3130	YKL171W	NNK1	Protein kinase; implicated in proteasome function; interacts with TORC1, Ure2 and Gdh2; overexpression leads to hypersensitivity to rapamycin and nuclear accumulation of Gln3; epitope-tagged protein localizes to the cytoplasm	739	EPEPSKYIGSLPY	15.0073	0	0	510247	21512	28387	eb04473_JV297_phos	eb04473.raw	U	K.Y#IGSLPYASPELLR.Y	0	0	1	1	30.6517	39.2186	41.3277	31.8777	49.0596	49.4465	45.6824	38.4704	35.7689	45.6647	0.148047	0.111366	1.27666	0.0357809
1709	YFR017C	IGD1	Cytoplasmic protein that inhibits Gdb1p glycogen debranching activity; required for normal intracellular accumulation of glycogen; phosphorylated in vivo; expression increases during wine fermentation	96	GAERRSSGPMDFQ	9.34047	-1	14	510246	19610	25413	eb04472_JV297_phos	eb04472.raw	U	R.SS#GPMDFQNTIHNMQYR.T	0	0	4	4	107.12	115.846	105.599	117.29	142.089	153.736	123.836	149.263	111.464	142.231	0.0534335	0.0925844	1.27603	0.00533481
2852	YGR233C	PHO81	Cyclin-dependent kinase (CDK) inhibitor, regulates Pho80p-Pho85p and Pcl7p-Pho85p cyclin-CDK complexes in response to phosphate levels; inhibitory activity for Pho80p-Pho85p requires myo-D-inositol heptakisphosphate (IP7) generated by Vip1p	543	NAKNKSSQHLCQP	0	-1	0	510246	14101	18512	eb04472_JV297_phos	eb04472.raw	U	K.SS#QHLCQPLFK.K	0	0	1	1	67.1112	83.5393	75.4309	59.5077	82.3858	99.5428	101.026	81.3657	71.3973	91.08	0.145428	0.116969	1.27568	0.0382241
2614	YGR261C	APL6	Beta3-like subunit of the yeast AP-3 complex; functions in transport of alkaline phosphatase to the vacuole via the alternate pathway; exists in both cytosolic and peripherally associated membrane-bound pools	726	NDGDSNSISGKGN	11.0148	-9	2	510246	13564	17843	eb04472_JV297_phos	eb04472.raw	U	K.LTGINDGDSNS#ISGK.G	0	0	1	1	72.7516	59.8904	50.6238	57.1812	85.1281	73.4737	76.125	71.9597	60.1118	76.6716	0.154399	0.0768817	1.27548	0.0236311
4043	YDL156W	YDL156W	Putative protein of unknown function; protein sequence contains three WD domains (WD-40 repeat); green fluorescent protein (GFP)-fusion protein localizes to the cytoplasm and nucleus; potential regulatory target of Mbp1p, which binds to the YDL156W promoter region	64	RATKSASPTLPTR	6.59058	-2	5	510247	2861	4594	eb04473_JV297_phos	eb04473.raw	U	K.SAS#PTLPTR.R	0	0	1	1	26.3856	19.2306	17.4992	21.7223	27.5394	33.7069	20.1136	26.8277	21.2094	27.0469	0.182073	0.205542	1.27523	0.135325
2808	YDR027C	VPS54	Component of the GARP (Golgi-associated retrograde protein) complex, Vps51p-Vps52p-Vps53p-Vps54p, which is required for the recycling of proteins from endosomes to the late Golgi; potentially phosphorylated by Cdc28p	65	TPRARRSSRLSLD	6.59058	0	9	510247	12538	17060	eb04473_JV297_phos	eb04473.raw	U	R.S#SRLSLDSITPR.R	0	0	2	2	133.589	117.55	93.2007	98.1818	140.66	139.654	123.044	160.93	110.631	141.072	0.167792	0.109931	1.27517	0.0454692
3569	YJL165C	HAL5	Putative protein kinase; overexpression increases sodium and lithium tolerance, whereas gene disruption increases cation and low pH sensitivity and impairs potassium uptake, suggesting a role in regulation of Trk1p and/or Trk2p transporters	17	SLKRARSLSESIK	17.0091	0	0	510246	10596	14143	eb04472_JV297_phos	eb04472.raw	R	R.S#LSESIK.G	0	0	1	1	58.782	55.4299	53.5178	44.438	92.6114	57.9329	63.5818	56.3515	53.0419	67.6194	0.115658	0.250637	1.27483	0.156886
3778	YNL272C	SEC2	Guanyl-nucleotide exchange factor for the small G-protein Sec4p; essential for post-Golgi vesicle transport and for autophagy; associates with the exocyst, via exocyst subunit Sec15p, on secretory vesicles	629	TKDDKSSIKSANN	0	-1	0	510246	3609	5328	eb04472_JV297_phos	eb04472.raw	U	K.DDKSS#IK.S	0	0	1	1	39.3036	40.8386	43.0245	48.542	48.9667	48.8233	57.8298	63.2549	42.9272	54.7187	0.0941737	0.129392	1.27469	0.0276015
420	YFR040W	SAP155	Protein that forms a complex with the Sit4p protein phosphatase and is required for its function; member of a family of similar proteins including Sap4p, Sap185p, and Sap190p	255	RKRGSSSFGNDDI	0	-2	25	510246	16456	21431	eb04472_JV297_phos	eb04472.raw	U	R.GSSS#FGNDDINNNDDDDDANEDDESAYLTK.A	0	0	1	1	28.4171	32.2964	28.8149	35.106	45.9222	38.6529	35.069	39.22	31.1586	39.716	0.101296	0.113991	1.27464	0.0210858
1090	YNL074C	MLF3	Serine-rich protein of unknown function, predicted to be palmitoylated; overproduction suppresses the growth inhibition caused by exposure to the immunosuppressant leflunomide	227	SRILRFYSYVDML	17.0091	0	0	510247	22057	29034	eb04473_JV297_phos	eb04473.raw	U	R.FY#SYVDMLNDEK.L	0	0	3	2	266.593	189.181	204.567	186.901	323.605	267.361	232.544	256.223	211.81	269.933	0.176359	0.143052	1.27441	0.0737003
104	YPL237W	SUI3	Beta subunit of the translation initiation factor eIF2, involved in the identification of the start codon; proposed to be involved in mRNA binding	116	AESKEGTPSANSS	13.3795	0	0	510246	24809	31653	eb04472_JV297_phos	eb04472.raw	U	K.EGT#PSANSSIQQEVGLPYSELLSR.F	0	0	7	3	47.1906	51.9688	48.9686	51.0383	62.6434	69.2968	52.288	69.4812	49.7916	63.4274	0.0429768	0.12737	1.27386	0.0171804
3867	YDR352W	YDR352W	Putative protein of unknown function	315	SLLSGETQTxxxx	24.2431	0	0	510247	10294	14215	eb04473_JV297_phos	eb04473.raw	U	R.TSLLSGET#QT.-	0	0	1	1	75.5718	74.2817	70.7568	81.8966	103.871	98.1107	90.0536	92.827	75.6267	96.2156	0.0614732	0.0634056	1.27224	0.00171407
3190	YLR072W	YLR072W	Protein of unknown function; green fluorescent protein (GFP)-fusion protein localizes to the cytoplasm in a punctate pattern; YLR072W is not an esssential gene	343	VDDYMGTPRASPS	24.2431	0	0	510247	4607	6899	eb04473_JV297_phos	eb04473.raw	U	R.SVDDYMGT#PR.A	0	0	1	1	29.2536	30.3081	26.6496	34.3872	32.443	39.9259	39.9675	41.0818	30.1496	38.3545	0.10668	0.103696	1.27214	0.018409
76	YER114C	BOI2	Protein implicated in polar growth, functionally redundant with Boi1p; interacts with bud-emergence protein Bem1p; contains an SH3 (src homology 3) domain and a PH (pleckstrin homology) domain	28	DVSDTLSPDFDSK	11.0148	-4	5	510246	17814	23136	eb04472_JV297_phos	eb04472.raw	U	K.DVSDTLS#PDFDSK.G	0	0	2	1	105.949	116.183	91.837	87.3468	145.54	134.403	106.37	123.947	100.329	127.565	0.131675	0.130565	1.27147	0.0427726
3244	YOL086C	ADH1	Alcohol dehydrogenase, fermentative isozyme active as homo- or heterotetramers; required for the reduction of acetaldehyde to ethanol, the last step in the glycolytic pathway	15	GVIFYESHGKLEY	11.0148	-2	0	510246	13259	17465	eb04472_JV297_phos	eb04472.raw	U	K.GVIFYES#HGK.L	0	0	2	2	138.584	147.49	144.283	141.496	184.479	177.406	180.256	184.445	142.963	181.646	0.0266555	0.0190111	1.27058	5.43618e-06
2903	YOR141C	ARP8	Nuclear actin-related protein involved in chromatin remodeling, component of chromatin-remodeling enzyme complexes; has mRNA binding activity	70	RSVTGLSVDPRDV	26.9265	0	0	510246	10141	13565	eb04472_JV297_phos	eb04472.raw	U	R.SVTGLS#VDPR.D	0	0	1	1	56.5115	70.5997	55.7872	67.4543	92.9251	69.2702	77.6341	78.1498	62.5882	79.4948	0.120642	0.12372	1.27012	0.0343212
3643	YDR359C	EAF1	Component of the NuA4 histone acetyltransferase complex; acts as a platform for assembly of NuA4 subunits into the native complex; required for initiation of pre-meiotic DNA replication, likely due to its requirement for expression of IME1	971	PRIKSPTPQEILQ	4.08456	-2	0	510246	10324	13796	eb04472_JV297_phos	eb04472.raw	U	K.SPT#PQEILQR.F	0	0	2	2	137.807	120.517	100.654	113.997	170.675	151.96	121.003	156.493	118.244	150.033	0.130591	0.139505	1.26884	0.0501747
468	YHR158C	KEL1	Protein required for proper cell fusion and cell morphology; functions in a complex with Kel2p to negatively regulate mitotic exit, interacts with Tem1p and Lte1p; localizes to regions of polarized growth; potential Cdc28p substrate	748	SDEKNVSPMGDVP	37.549	0	0	510247	11854	16193	eb04473_JV297_phos	eb04473.raw	U	K.NVS#PMGDVPTDTK.N	0	0	1	1	83.9607	87.3581	91.4727	81.6744	128.343	92.515	108.782	106.67	86.1165	109.077	0.0495436	0.135087	1.26663	0.0242083
262	YOR260W	GCD1	Gamma subunit of the translation initiation factor eIF2B, the guanine-nucleotide exchange factor for eIF2; activity subsequently regulated by phosphorylated eIF2; first identified as a negative regulator of GCN4 expression	317	QQNPPTTDDDEDR	0	-11	0	510246	5396	7567	eb04472_JV297_phos	eb04472.raw	U	K.DPFTGNQQQQNPPTT#DDDEDR.N	0	0	2	1	14.4476	13.7602	16.3853	13.3575	19.8586	20.248	15.4007	17.8328	14.4876	18.335	0.0926849	0.121319	1.26556	0.0252343
2001	YPL190C	NAB3	Single stranded RNA binding protein; acidic ribonucleoprotein; required for termination of non-poly(A) transcripts and efficient splicing; interacts with Nrd1p	86	NGEVINTEEEEEE	1000	0	0	510246	4568	6535	eb04472_JV297_phos	eb04472.raw	U	K.GEENGEVINT#EEEEEEEHQQK.G	0	0	2	2	88.7407	100.477	80.9377	77.0346	117.234	100.166	105.355	116.596	86.7974	109.838	0.11909	0.076897	1.26545	0.0135978
3439	YBR127C	VMA2	Subunit B of the eight-subunit V1 peripheral membrane domain of the vacuolar H+-ATPase (V-ATPase), an electrogenic proton pump found throughout the endomembrane system; contains nucleotide binding sites; also detected in the cytoplasm	515	DASQEESLIxxxx	31.2747	0	0	510247	8677	12159	eb04473_JV297_phos	eb04473.raw	U	K.DASQEES#LI.-	0	0	2	2	162.544	132.131	138.13	148.58	187.291	167.341	176.767	204.176	145.346	183.894	0.0916996	0.0858481	1.26521	0.00971973
932	YDR239C	YDR239C	Protein of unknown function that may interact with ribosomes, based on co-purification experiments	307	SFSTSASGKSTKS	11.0148	-6	0	510247	16246	21818	eb04473_JV297_phos	eb04473.raw	U	K.FSFSTSAS#GK.S	1	1	2	1	20.3867	16.8004	16.479	18.0627	20.1607	20.4867	26.6945	23.3337	17.9322	22.6689	0.0988912	0.134045	1.26414	0.0359271
2053	YOR048C	RAT1	Nuclear 5' to 3' single-stranded RNA exonuclease, involved in RNA metabolism, including rRNA and snRNA processing as well as poly (A+) dependent and independent mRNA transcription termination	543	KTEKAESECDLDA	1000	0	0	510246	13205	17398	eb04472_JV297_phos	eb04472.raw	U	K.AES#ECDLDAEIK.D	0	0	2	2	70.6126	70.4524	72.1413	73.2835	118.454	81.2573	89.0887	73.0478	71.6224	90.462	0.0187617	0.218626	1.26304	0.106055
3672	YMR160W	YMR160W	Putative protein of unknown function; green fluorescent protein (GFP)-fusion protein localizes to the membrane of the vacuole; mutant has enhanced sensitivity to overexpression of mutant huntingtin; YMR160W is not an essential gene	79	FQDSVNSNNDNKG	23.6238	0	0	510247	6979	10006	eb04473_JV297_phos	eb04473.raw	U	R.SSPTTDFQDSVNS#NNDNK.G	0	0	2	1	33.4002	31.7809	21.3093	33.5376	47.8395	35.8683	32.6692	35.194	30.007	37.8928	0.195058	0.178732	1.2628	0.128557
3883	YDR233C	RTN1	ER membrane protein that interacts with Sey1p to maintain ER morphology; interacts with exocyst subunit Sec6p, with Yip3p, and with Sbh1p; null mutant has an altered ER morphology; member of the RTNLA (reticulon-like A) subfamily	186	EISKQKTQEFSQM	18.8054	0	0	510247	11659	15946	eb04473_JV297_phos	eb04473.raw	U	K.T#QEFSQMACEK.T	0	0	2	2	75.5359	82.035	84.3835	88.314	80.7474	107.194	121.486	107.48	82.5671	104.227	0.0648632	0.163251	1.26233	0.0512683
1912	YMR086W	YMR086W	Component of the eisosome with unknown function; may interact with ribosomes, based on co-purification experiments; GFP-fusion protein localizes to the cell periphery; expression is repressed by cAMP; similar to A. gossypii SEG gene which is important for stabilizing eisosomes	319	NLEKPSSLNIEKD	9.34047	-1	0	510247	12556	17084	eb04473_JV297_phos	eb04473.raw	U	K.PSS#LNIEK.D	0	0	2	2	223.393	186.635	241.429	250.343	291.441	271.803	284.98	290.1	225.45	284.581	0.125085	0.0314912	1.26228	0.00714597
139	YOR220W	RCN2	Protein of unknown function; green fluorescent protein (GFP)-fusion protein localizes to the cytoplasm and is induced in response to the DNA-damaging agent MMS; phosphorylated in response to alpha factor	201	NRSSQTSLPSQLE	6.59058	-4	3	510247	11990	16366	eb04473_JV297_phos	eb04473.raw	U	R.SSQTS#LPSQLENK.D	0	0	5	5	222.139	223.529	175.232	189.763	279.961	254.632	240.943	247.615	202.666	255.788	0.118612	0.0666843	1.26212	0.0113053
2872	YNL225C	CNM67	Component of the spindle pole body outer plaque; required for spindle orientation and mitotic nuclear migration	20	RLDSPVSENGEIK	1000	0	0	510246	14341	18807	eb04472_JV297_phos	eb04472.raw	U	R.LDS#PVS#ENGEIK.D	1	1	5	1	75.3567	94.1014	77.0028	77.2829	105.498	112.776	96.0654	94.2416	80.9359	102.145	0.10895	0.084537	1.26205	0.0138521
608	YMR205C	PFK2	Beta subunit of heterooctameric phosphofructokinase involved in glycolysis, indispensable for anaerobic growth, activated by fructose-2,6-bisphosphate and AMP, mutation inhibits glucose induction of cell cycle-related genes	184	RMKTTDTYPSLPK	6.59058	-3	3	510246	13697	18010	eb04472_JV297_phos	eb04472.raw	U	K.TTDT#YPSLPK.P	0	0	4	4	153.581	163.018	177.168	152.645	241.917	194.126	191.463	187.915	161.603	203.855	0.0704514	0.125097	1.26146	0.0232219
3604	YMR029C	FAR8	Protein involved in recovery from cell cycle arrest in response to pheromone, in a Far1p-independent pathway; interacts with Far3p, Far7p, Far9p, Far10p, and Far11p	165	KQGPSESPSPTKV	6.59058	-2	4	510246	2090	3404	eb04472_JV297_phos	eb04472.raw	U	K.QGPSES#PSPTK.V	0	0	2	2	26.9353	31.0761	32.4584	38.1252	40.3098	43.4	39.7819	38.7001	32.1487	40.5479	0.143832	0.0497177	1.26126	0.015804
2518	YJL042W	MHP1	Microtubule-associated protein involved in assembly and stabilization of microtubules; overproduction results in cell cycle arrest at G2 phase; similar to Drosophila protein MAP and to mammalian MAP4 proteins	311	NRRASFSLHNDKP	11.0148	-2	0	510246	8361	11328	eb04472_JV297_phos	eb04472.raw	U	R.ASFS#LHNDK.P	0	0	1	1	38.3954	39.5131	45.2939	43.1049	59.1807	48.2664	49.4676	52.7608	41.5768	52.4189	0.0767305	0.0933229	1.26077	0.00993539
1710	YFR017C	IGD1	Cytoplasmic protein that inhibits Gdb1p glycogen debranching activity; required for normal intracellular accumulation of glycogen; phosphorylated in vivo; expression increases during wine fermentation	83	ARERESSIGEHAP	9.34047	-1	0	510247	1137	2311	eb04473_JV297_phos	eb04473.raw	U	R.ESS#IGEHAPGAER.R	0	0	2	2	75.0221	71.5886	65.3644	76.1328	106.393	84.0286	89.1877	83.6144	72.027	90.8059	0.0672609	0.11779	1.26072	0.0186335
1573	YDL065C	PEX19	Chaperone and import receptor for newly-synthesized class I peroxisomal membrane proteins (PMPs), binds PMPs in the cytoplasm and delivers them to the peroxisome for subsequent insertion into the peroxisomal membrane	304	PIRSANSPLKHGN	37.5398	0	0	510247	3325	5191	eb04473_JV297_phos	eb04473.raw	U	R.SANS#PLK.H	0	0	1	1	157.537	204.193	139.13	121.629	216.527	162.395	179.86	224.668	155.622	195.863	0.228405	0.151255	1.25858	0.132639
2873	YNL225C	CNM67	Component of the spindle pole body outer plaque; required for spindle orientation and mitotic nuclear migration	103	KNEKDKSPIGTDV	27.1205	0	0	510246	5483	7677	eb04472_JV297_phos	eb04472.raw	U	K.S#PIGTDVHK.K	0	0	1	1	85.1438	89.0518	81.9163	101.279	126.367	110.111	105.108	107.952	89.3478	112.385	0.0948267	0.0849272	1.25783	0.0112302
2743	YFR016C	YFR016C	Putative protein of unknown function; green fluorescent protein (GFP)-fusion protein localizes to the cytoplasm and bud; interacts with Spa2p; YFL016C is not an essential gene	861	EDVEVDTEEDAEV	32.218	0	0	510247	7738	10953	eb04473_JV297_phos	eb04473.raw	U	K.ENEDVEVDT#EEDAEVENSEK.T	0	0	3	2	38.4432	41.8906	41.7441	41.5495	59.9708	41.2386	53.2776	51.2616	40.9069	51.4372	0.0402965	0.150696	1.25742	0.0376454
3713	YLR190W	MMR1	Phosphorylated protein of the mitochondrial outer membrane, localizes only to mitochondria of the bud; interacts with Myo2p to mediate mitochondrial distribution to buds; mRNA is targeted to the bud via the transport system involving She2p	12	MKSEQLTPKLSPM	44.2778	0	0	510247	3596	5564	eb04473_JV297_phos	eb04473.raw	U	K.SEQLT#PK.L	0	0	2	2	142.086	125.714	148.717	135.64	152.106	172.221	204.996	164.714	138.039	173.509	0.0709866	0.130092	1.25695	0.0279531
1542	YLR310C	CDC25	Membrane bound guanine nucleotide exchange factor (GEF or GDP-release factor); indirectly regulates adenylate cyclase through activation of Ras1p and Ras2p by stimulating the exchange of GDP for GTP; required for progression through G1	742	EVTASSSKNSSIS	6.59058	-9	0	510246	4893	6942	eb04472_JV297_phos	eb04472.raw	U	K.AVTSNEVTASSS#K.N	0	0	1	1	23.2188	31.2234	31.5423	36.034	39.3569	35.0727	33.4485	45.4826	30.5046	38.3402	0.174751	0.140177	1.25686	0.0838606
2339	YPR163C	TIF3	Translation initiation factor eIF-4B, has RNA annealing activity; contains an RNA recognition motif and binds to single-stranded RNA	71	SGGFGGSFGGRSR	33.6572	0	0	510246	5347	7507	eb04472_JV297_phos	eb04472.raw	U	R.SGGFGGS#FGGR.S	0	0	2	2	144.165	133.52	131.499	125.394	168.955	169.781	156.134	176.961	133.644	167.958	0.0585	0.0515828	1.25675	0.00107142
719	YDR028C	REG1	Regulatory subunit of type 1 protein phosphatase Glc7p, involved in negative regulation of glucose-repressible genes	576	SDSGVHSPITDNS	15.0073	0	0	510247	2190	3708	eb04473_JV297_phos	eb04473.raw	U	R.SDSGVHS#PITDNSSVASSTTSR.A	1	0	4	3	50.1183	53.4942	50.5301	45.0131	78.5047	60.4523	52.387	58.8178	49.7889	62.5405	0.0707217	0.179048	1.25611	0.0727972
357	YDL195W	SEC31	Component of the Sec13p-Sec31p complex of the COPII vesicle coat, required for vesicle formation in ER to Golgi transport; mutant has increased aneuploidy tolerance	974	PLSRAPSSVSMVS	7.97117	0	0	510247	15481	20836	eb04473_JV297_phos	eb04473.raw	U	R.APS#S#VSM*VSPPPLHK.N	1	1	12	5	381.635	363.55	289.898	280.456	438.109	412.2	333.508	468.608	328.885	413.106	0.155532	0.140054	1.25608	0.0719479
2127	YDR345C	HXT3	Low affinity glucose transporter of the major facilitator superfamily, expression is induced in low or high glucose conditions	23	SNADLPSNSSQVM	11.0148	0	2	510247	16689	22389	eb04473_JV297_phos	eb04473.raw	U	K.SSENS#NADLPS#NSS#QVMNMPEEK.G	2	1	19	1	21.2232	17.9997	16.7393	21.8138	19.9748	29.1455	25.1606	23.4062	19.444	24.4218	0.126616	0.15622	1.256	0.0708218
2475	YDR216W	ADR1	Carbon source-responsive zinc-finger transcription factor, required for transcription of the glucose-repressed gene ADH2, of peroxisomal protein genes, and of genes required for ethanol, glycerol, and fatty acid utilization	259	DRVKFSTPELVPL	6.59058	-1	0	510246	23885	30506	eb04472_JV297_phos	eb04472.raw	U	K.FST#PELVPLDLK.N	0	0	6	4	192.467	188.287	195.177	212.557	190.812	264.431	253.783	280.911	197.122	247.484	0.0541461	0.159183	1.25549	0.0486028
654	YER063W	THO1	Conserved nuclear RNA-binding protein; specifically binds to transcribed chromatin in a THO- and RNA-dependent manner, genetically interacts with shuttling hnRNP NAB2; overproduction suppresses transcriptional defect caused by hpr1 mutation	48	KGESEVSPQEQNQ	15.5899	0	0	510246	14202	18636	eb04472_JV297_phos	eb04472.raw	U	K.GESEVS#PQEQNQEQGSEPAAIEEPASQNITEK.K	0	0	1	1	19.7653	24.8798	21.8298	25.8394	33.1286	30.8693	25.309	26.5738	23.0786	28.9702	0.121025	0.126115	1.25529	0.0427826
3490	YNL309W	STB1	Protein with a role in regulation of MBF-specific transcription at Start, phosphorylated by Cln-Cdc28p kinases in vitro; unphosphorylated form binds Swi6p and binding is required for Stb1p function; expression is cell-cycle regulated	252	HIKPSASSPQSTF	6.59058	-2	5	510246	8086	10980	eb04472_JV297_phos	eb04472.raw	U	K.PSAS#SPQSTFK.S	0	0	2	2	207.93	152.898	163.843	178.588	243.323	219.4	205.305	214.416	175.815	220.611	0.135699	0.0735548	1.25479	0.0209797
3112	YKL062W	MSN4	Transcriptional activator related to Msn2p; activated in stress conditions, which results in translocation from the cytoplasm to the nucleus; binds DNA at stress response elements of responsive genes, inducing gene expression	558	QPRKRKSITTIDP	0	0	9	510246	15979	20838	eb04472_JV297_phos	eb04472.raw	U	K.S#ITTIDPNNYDK.N	0	0	2	2	158.708	182.785	156.067	164.76	230.529	197.72	187.529	215.021	165.58	207.7	0.0726745	0.0914033	1.25438	0.00953428
3115	YER070W	RNR1	Major isoform of the large subunit of ribonucleotide-diphosphate reductase; the RNR complex catalyzes rate-limiting step in dNTP synthesis, regulated by DNA replication and DNA damage checkpoint pathways via localization of small subunits	822	SPAPTGSHSLTKG	0	-6	4	510246	3814	5587	eb04472_JV297_phos	eb04472.raw	U	R.EASPAPTGS#HSLTK.G	0	0	1	1	39.3753	54.3253	57.8484	43.314	66.8615	60.9827	54.094	62.4086	48.7157	61.0867	0.180241	0.0866249	1.25394	0.0523296
637	YMR291W	TDA1	Putative kinase of unknown function; green fluorescent protein (GFP)-fusion protein localizes to the cytoplasm and nucleus; null mutant is sensitive to expression of the top1-T722A allele; not an essential gene	538	EVDLLLTPRTASM	91.0872	0	0	510246	22758	29168	eb04472_JV297_phos	eb04472.raw	U	K.YVNEVDLLLT#PR.T	0	0	2	2	74.9743	73.4612	73.6716	68.6828	92.7741	94.3582	84.2892	93.1897	72.6975	91.1528	0.0379493	0.0507348	1.25386	0.000474549
313	YBL047C	EDE1	Key endocytic protein involved in a network of interactions with other endocytic proteins, binds membranes in a ubiquitin-dependent manner, may also bind ubiquitinated membrane-associated proteins	1100	VSSIQESPKISAQ	23.5235	0	0	510246	3176	4785	eb04472_JV297_phos	eb04472.raw	U	K.RANSNEDGESVSSIQES#PK.I	4	4	8	1	41.2156	40.8386	32.1253	50.228	58.0419	34.4362	53.5003	60.0873	41.1019	51.5164	0.179859	0.2274	1.25338	0.183365
4059	YNL189W	SRP1	Karyopherin alpha homolog, forms a dimer with karyopherin beta Kap95p to mediate import of nuclear proteins, binds the nuclear localization signal of the substrate during import; may also play a role in regulation of protein degradation	28	KNKGRFSADELRR	1000	0	0	510247	4269	6444	eb04473_JV297_phos	eb04473.raw	U	K.GRFS#ADELR.R	0	0	1	1	67.1949	56.9132	63.1575	65.5068	100.339	69.8669	76.8177	69.5417	63.1931	79.1413	0.071243	0.183528	1.25237	0.0807493
176	YNL323W	LEM3	Membrane protein of the plasma membrane and ER, interacts specifically in vivo with the phospholipid translocase (flippase) Dnf1p; involved in translocation of phospholipids and alkylphosphocholine drugs across the plasma membrane	36	EEDVDASEFEEDE	78.4882	0	0	510246	20912	27006	eb04472_JV297_phos	eb04472.raw	U	K.GAIVSGDNPEEEEDVDAS#EFEEDEVK.P	0	0	3	3	101.826	104.863	94.3354	104.991	127.169	124.087	120.125	136.714	101.504	127.024	0.049239	0.0556919	1.25142	0.00106019
3856	YBR121C	GRS1	Cytoplasmic and mitochondrial glycyl-tRNA synthase that ligates glycine to the cognate anticodon bearing tRNA; transcription termination factor that may interact with the 3'-end of pre-mRNA to promote 3'-end formation	666	AEAEAETDxxxxx	27.6725	0	0	510247	21561	28444	eb04473_JV297_phos	eb04473.raw	U	K.DLTPFIAQAEAEAET#D.-	0	0	1	1	29.7555	35.7996	32.0732	34.1258	40.7746	44.3547	34.1659	45.5551	32.9385	41.2126	0.0793145	0.124182	1.2512	0.0280617
1783	YDR135C	YCF1	Vacuolar glutathione S-conjugate transporter of the ATP-binding cassette family, has a role in detoxifying metals such as cadmium, mercury, and arsenite; also transports unconjugated bilirubin; similar to human cystic fibrosis protein CFTR	878	SSVRESSIPVEGE	0	-1	0	510247	20822	27570	eb04473_JV297_phos	eb04473.raw	U	R.ESS#IPVEGELEQLQK.L	0	0	1	1	34.6191	28.6249	32.9476	36.4784	40.3446	45.4553	38.0872	42.0974	33.1675	41.4961	0.10113	0.0749036	1.25111	0.0108018
2338	YHR016C	YSC84	Actin-binding protein involved in bundling of actin filaments and endocytosis of actin cortical patches; activity stimulated by Las17p; contains SH3 domain similar to Rvs167p	274	SRRRGMSLGSRSR	24.2431	0	0	510247	2770	4473	eb04473_JV297_phos	eb04473.raw	U	R.GMS#LGSR.S	0	0	1	1	99.7108	80.3307	64.7918	69.7677	100.583	114.314	78.9453	99.3556	78.6503	98.2995	0.196606	0.148283	1.24983	0.113897
2898	YIL112W	HOS4	Subunit of the Set3 complex, which is a meiotic-specific repressor of sporulation specific genes that contains deacetylase activity; potential Cdc28p substrate	507	NEKAADSPSMASN	4.08456	0	5	510247	8312	11692	eb04473_JV297_phos	eb04473.raw	U	K.AADS#PSMASNIDEK.A	0	0	2	1	53.1536	53.8098	48.8333	52.9335	64.1889	65.279	57.4339	73.8941	52.1826	65.199	0.0433793	0.10362	1.24944	0.0106593
341	YLR079W	SIC1	Inhibitor of Cdc28-Clb kinase complexes that controls G1/S phase transition, preventing premature S phase and ensuring genomic integrity; phosphorylation targets Sic1p for SCF(CDC4)-dependent turnover; functional homolog of mammalian Kip1	201	DARSQESEDEEDI	24.2431	0	0	510247	17131	22958	eb04473_JV297_phos	eb04473.raw	U	R.SQES#EDEEDIIINPVR.V	0	0	3	3	62.0564	71.4413	64.5212	70.9309	96.8643	67.7321	84.9324	86.504	67.2374	84.0082	0.0695133	0.143713	1.24943	0.0411653
2074	YJR059W	PTK2	Putative serine/threonine protein kinase involved in regulation of ion transport across plasma membrane; enhances spermine uptake	774	SAPNVSSSSNSLR	0	-6	4	510247	8342	11732	eb04473_JV297_phos	eb04473.raw	U	K.NFSAPNVSS#SSNSLR.S	0	0	2	2	115.736	114.742	101.258	101.253	142.821	122.403	138.024	137.572	108.247	135.205	0.0746744	0.0655235	1.24904	0.00412248
3872	YPL071C	YPL071C	Putative protein of unknown function; green fluorescent protein (GFP)-fusion protein localizes to both the cytoplasm and the nucleus	21	IRKRNHSPDPIGI	101.896	0	0	510247	11697	15994	eb04473_JV297_phos	eb04473.raw	U	R.NHS#PDPIGIDNYK.R	0	0	1	1	43.988	39.0397	45.2315	40.5823	54.858	47.5238	51.5705	56.7746	42.2104	52.6818	0.0683762	0.0769698	1.24808	0.00563711
3629	YJL013C	MAD3	Subunit of the spindle-assembly checkpoint complex, which delays anaphase onset in cells with defects in mitotic spindle assembly; pseudosubstrate inhibitor of APC(Cdc20), the anaphase promoting complex involved in securin (Pds1p) turnover	499	KNSEIISDDDKSS	27.1205	0	0	510246	7132	9758	eb04472_JV297_phos	eb04472.raw	U	K.NSEIIS#DDDK.S	0	0	2	2	57.611	71.8095	70.1322	69.5847	103.127	75.7013	79.4649	77.5574	67.2843	83.9628	0.0968727	0.153265	1.24788	0.0600697
3955	YGR254W	ENO1	Enolase I, a phosphopyruvate hydratase that catalyzes the conversion of 2-phosphoglycerate to phosphoenolpyruvate during glycolysis and the reverse reaction during gluconeogenesis; expression is repressed in response to glucose	40	IVPSGASTGVHEA	0	-7	1	510247	15099	20341	eb04473_JV297_phos	eb04473.raw	R	R.SIVPSGAS#TGVHEALEM*R.D	0	0	1	1	47.6446	56.6818	56.6616	59.756	100.188	62.6933	56.6051	55.8679	55.186	68.8385	0.0948358	0.306835	1.24739	0.256222
2535	YPR156C	TPO3	Polyamine transport protein specific for spermine; localizes to the plasma membrane; member of the major facilitator superfamily	132	NEDALESDNNEKG	65.2463	0	0	510247	7029	10069	eb04473_JV297_phos	eb04473.raw	U	R.QIDGASSPSSNEDALES#DNNEK.G	1	1	6	2	104.037	108.777	102.174	106.442	126.344	134.536	127.683	137.04	105.357	131.401	0.0272601	0.0395494	1.24719	0.000121605
2141	YIL047C	SYG1	Plasma membrane protein of unknown function; truncation and overexpression suppresses lethality of G-alpha protein deficiency	859	GTFRRRSSVFENI	47.5743	0	0	510247	3984	6075	eb04473_JV297_phos	eb04473.raw	U	R.RRS#S#VFENISR.S	1	1	5	4	218.04	220.047	225.481	226.817	321.235	269.059	264.446	254.458	222.596	277.299	0.0189526	0.107889	1.24575	0.0110822
772	YDR422C	SIP1	Alternate beta-subunit of the Snf1p kinase complex, may confer substrate specificity; vacuolar protein containing KIS (Kinase-Interacting Sequence) and ASC (Association with Snf1 kinase Complex) domains involved in protein interactions	388	RRSSFASLHSLQS	7.97117	-4	6	510246	9692	12999	eb04472_JV297_phos	eb04472.raw	U	R.SSFAS#LHSLQSR.K	1	1	2	1	47.9076	44.4154	54.6005	57.5472	59.2388	66.0613	65.2889	64.1012	51.1177	63.6725	0.117753	0.0481183	1.24561	0.00987929
1647	YLR399C	BDF1	Protein involved in transcription initiation at TATA-containing promoters; associates with the basal transcription factor TFIID; contains two bromodomains; corresponds to the C-terminal region of mammalian TAF1; redundant with Bdf2p	615	RDASSLSPTSAGS	20.1669	0	0	510246	1898	3163	eb04472_JV297_phos	eb04472.raw	U	R.DASSLS#PTSAGSR.K	0	0	3	3	247.795	232.597	244.979	264.707	322.06	289.811	306.825	314.183	247.519	308.22	0.0534254	0.044641	1.24523	0.000708053
3507	YLR025W	SNF7	One of four subunits of the endosomal sorting complex required for transport III (ESCRT-III); involved in the sorting of transmembrane proteins into the multivesicular body (MVB) pathway; recruited from the cytoplasm to endosomal membranes	119	AMKTIHSGLDIDK	45.026	0	0	510247	11426	15648	eb04473_JV297_phos	eb04473.raw	U	K.TIHS#GLDIDK.V	0	0	3	3	333.811	370.462	247.123	269.438	474.514	390.335	339.284	315.742	305.209	379.969	0.18659	0.185017	1.24495	0.149488
3348	YDL175C	AIR2	Zinc knuckle protein, involved in nuclear RNA processing and degredation as a component of the TRAMP complex; stimulates the poly(A) polymerase activity of Pap2p in vitro; functionally redundant with Air1p	49	GRYFGVSDDDKDA	44.2778	0	0	510247	12729	17304	eb04473_JV297_phos	eb04473.raw	U	R.YFGVS#DDDK.D	0	0	4	4	334.206	338.323	330.039	352.119	445.371	406.207	416.622	417.891	338.672	421.523	0.0282918	0.0397099	1.24464	0.000136692
2583	YBR255W	MTC4	Protein of unknown function, required for normal growth rate at 15 degrees C; green fluorescent protein (GFP)-fusion protein localizes to the cytoplasm in a punctate pattern; mtc4 is synthetically sick with cdc13-1	481	GEQALESDKELPN	1000	0	0	510246	4843	6880	eb04472_JV297_phos	eb04472.raw	U	R.AEGEQALES#DK.E	0	0	3	3	151.335	151.73	133.342	141.836	199.678	179.527	160.81	179.5	144.561	179.879	0.0606456	0.0882451	1.24432	0.00802687
1143	YDR017C	KCS1	Inositol hexakisphosphate (IP6) and inositol heptakisphosphate (IP7) kinase; generation of high energy inositol pyrophosphates by Kcs1p is required for many processes such as vacuolar biogenesis, stress response and telomere maintenance	396	SKDDFLSDLDQEN	1000	0	0	510246	21580	27785	eb04472_JV297_phos	eb04472.raw	U	K.DDFLS#DLDQENNGK.N	0	0	1	1	83.6978	81.5405	80.5838	76.6163	112.633	91.4012	97.4756	99.5732	80.6096	100.271	0.036766	0.0891614	1.2439	0.00584659
3380	YOR109W	INP53	Polyphosphatidylinositol phosphatase, dephosphorylates multiple phosphatidylinositols; involved in trans Golgi network-to-early endosome pathway; hyperosmotic stress causes translocation to actin patches; contains Sac1 and 5-ptase domains	1035	STSNLASPMSSKV	23.6238	0	0	510246	8592	11618	eb04472_JV297_phos	eb04472.raw	U	K.STSNLAS#PMSSK.V	0	0	4	4	329.246	349.022	328.144	304.57	484.368	429.399	341.932	372.505	327.746	407.051	0.0554883	0.1548	1.24197	0.0519723
2897	YIL112W	HOS4	Subunit of the Set3 complex, which is a meiotic-specific repressor of sporulation specific genes that contains deacetylase activity; potential Cdc28p substrate	192	VLEKNTTEPENVE	9.34047	-1	0	510246	3134	4734	eb04472_JV297_phos	eb04472.raw	U	K.NTT#EPENVEK.D	0	0	3	3	234.029	208.506	223.95	220.478	286.201	266.38	256.653	292.119	221.741	275.338	0.0474863	0.0603728	1.24171	0.00159094
115	YLR330W	CHS5	Component of the exomer complex, which also contains Csh6p, Bch1p, Bch2p, and Bud7p and is involved in export of selected proteins, such as chitin synthase Chs3p, from the Golgi to the plasma membrane	312	DVEQVASPNDNES	29.3762	0	0	510246	13565	17844	eb04472_JV297_phos	eb04472.raw	U	K.MPEDTTDVEQVAS#PNDNESNPSEAK.E	0	0	3	2	25.4057	26.2474	31.0634	31.9692	39.7985	31.0284	35.3906	36.0403	28.6714	35.5644	0.115919	0.101068	1.24041	0.030512
2540	YOL138C	RTC1	Subunit of the SEA (Seh1-associated) complex, a coatomer-related complex that associates dynamically with the vacuole; null mutation suppresses cdc13-1 temperature sensitivity; has N-terminal WD-40 repeats and a C-terminal RING motif	1089	FTYNSVSPRSKVS	6.59058	-5	0	510246	7669	10449	eb04472_JV297_phos	eb04472.raw	U	R.FTYNSVS#PR.S	0	0	3	3	212.256	229.641	199.175	195.253	261.043	255.547	253.647	265.907	209.081	259.036	0.0742062	0.0214322	1.23893	0.000912979
1759	YGL049C	TIF4632	Translation initiation factor eIF4G, subunit of the mRNA cap-binding protein complex (eIF4F) that also contains eIF4E (Cdc33p); associates with the poly(A)-binding protein Pab1p, also interacts with eIF4A (Tif1p); homologous to Tif4631p	351	GKTVNKSDDETIN	14.0618	0	0	510247	20432	27109	eb04473_JV297_phos	eb04473.raw	U	K.S#DDETINSVITTEENTVK.E	0	0	2	2	79.4317	102.97	106.702	108.22	169.815	117.629	99.4548	105.171	99.3309	123.017	0.135389	0.261001	1.23846	0.222443
584	YIL044C	AGE2	ADP-ribosylation factor (ARF) GTPase activating protein (GAP) effector, involved in Trans-Golgi-Network (TGN) transport; contains C2C2H2 cysteine/histidine motif	206	SVTSSATSIGAAN	15.0073	0	0	510247	6916	9926	eb04473_JV297_phos	eb04473.raw	U	K.TTSNTSVTSSAT#SIGAANTK.T	0	0	1	1	37.0809	24.3959	28.565	27.5646	27.5162	38.2684	39.8067	39.897	29.4016	36.372	0.184316	0.163616	1.23708	0.133973
1850	YNL212W	VID27	Cytoplasmic protein of unknown function; possibly involved in vacuolar protein degradation; not essential for proteasome-dependent degradation of fructose-1,6-bisphosphatase (FBPase); null mutants exhibit normal growth	170	KSSLTASADDLKE	11.0148	-5	0	510246	11795	15639	eb04472_JV297_phos	eb04472.raw	U	K.SSLTAS#ADDLK.E	0	0	2	2	159.365	168.12	162.896	164.917	233.457	202.348	199.231	175.305	163.825	202.585	0.0223986	0.117802	1.2366	0.0183529
1022	YIL135C	VHS2	Cytoplasmic protein of unknown function; identified as a high-copy suppressor of the synthetic lethality of a sis2 sit4 double mutant, suggesting a role in G1/S phase progression; similar to Mlf3p	75	LFNHNNSSNRNFH	6.59058	-8	1	510246	3638	5366	eb04472_JV297_phos	eb04472.raw	U	R.TSLFNHNNS#SNR.N	1	1	2	1	33.711	54.462	33.3745	30.5707	54.5443	39.5944	43.1713	50.778	38.0295	47.022	0.290434	0.145636	1.23646	0.215669
2320	YMR139W	RIM11	Protein kinase required for signal transduction during entry into meiosis; promotes the formation of the Ime1p-Ume6p complex by phosphorylating Ime1p and Ume6p; shares similarity with mammalian glycogen synthase kinase 3-beta	199	TEPNVSYICSRYY	6.59058	-6	3	510246	8487	11487	eb04472_JV297_phos	eb04472.raw	U	K.PTEPNVSY#ICSR.Y	0	0	2	2	118.675	98.2778	128.491	115.447	118.663	168.72	168.405	114.057	115.223	142.461	0.109222	0.211973	1.2364	0.146928
52	YPL085W	SEC16	COPII vesicle coat protein required for ER transport vesicle budding; Sec16p is bound to the periphery of ER membranes and may act to stabilize initial COPII complexes; interacts with Sec23p, Sec24p and Sec31p	806	NKYAPVSPTVQQK	17.0091	0	0	510247	9366	13038	eb04473_JV297_phos	eb04473.raw	U	K.YAPVS#PTVQQK.Q	0	0	4	4	563.251	512.082	463.162	450.405	565.115	654.514	595.257	643.043	497.225	614.482	0.103418	0.0679157	1.23582	0.0122021
3795	YPR052C	NHP6A	High-mobility group (HMG) protein that binds to and remodels nucleosomes; involved in recruiting FACT and other chromatin remodelling complexes to the chromosomes; functionally redundant with Nhp6Bp; homologous to mammalian HMGB1 and HMGB2	63	EKWKALTPEEKQP	1000	0	0	510246	5753	8015	eb04472_JV297_phos	eb04472.raw	U	K.ALT#PEEK.Q	0	0	1	1	13.2645	7.39556	14.2096	10.273	15.6638	15.8059	13.2112	11.0865	11.2857	13.9418	0.2737	0.16106	1.23536	0.213592
964	YCL050C	APA1	Diadenosine 5',5''-P1,P4-tetraphosphate phosphorylase I (AP4A phosphorylase), involved in catabolism of bis(5'-nucleosidyl) tetraphosphates; has similarity to Apa2p	60	KPERGQTPEGEDP	23.0918	0	0	510246	23056	29516	eb04472_JV297_phos	eb04472.raw	U	R.GQT#PEGEDPLGKPEEELTVIPEFGGADNK.A	0	0	1	1	17.4231	33.3274	28.3568	22.5327	33.9072	29.7687	29.5025	32.3407	25.41	31.3798	0.272124	0.0674287	1.23494	0.149804
3665	YPR042C	PUF2	Member of the PUF protein family, which is defined by the presence of Pumilio homology domains that confer RNA binding activity; preferentially binds mRNAs encoding membrane-associated proteins	894	HPQGFHSPGRARG	1000	0	0	510247	345	1143	eb04473_JV297_phos	eb04473.raw	U	K.QHPQGFHS#PGR.A	0	0	1	1	18.4867	18.0523	18.2383	11.8022	22.9727	21.2956	19.3343	18.6186	16.6449	20.5553	0.194255	0.0958017	1.23493	0.0843726
1990	YER129W	SAK1	Upstream serine/threonine kinase for the SNF1 complex; partially redundant with Elm1p and Tos3p; members of this family have functional orthology with LKB1, a mammalian kinase associated with Peutz-Jeghers cancer-susceptibility syndrome	1126	THERSRSLTVAEL	17.0091	0	0	510247	17520	23464	eb04473_JV297_phos	eb04473.raw	U	R.S#LTVAELNEEK.R	0	0	3	3	254.141	249.303	241.928	254.943	270.421	330.545	323.884	310.084	250.079	308.733	0.0239027	0.0872135	1.23454	0.00536107
3206	YCL032W	STE50	Protein involved in mating response, invasive/filamentous growth, and osmotolerance, acts as an adaptor that links G protein-associated Cdc42p-Ste20p complex to the effector Ste11p to modulate signal transduction	211	TVFRQPSLSHSKS	6.59058	0	4	510247	2129	3627	eb04473_JV297_phos	eb04473.raw	U	R.QPS#LSHSK.S	0	0	1	1	30.4725	19.7355	24.2137	28.8063	37.2305	29.8483	25.0493	35.194	25.807	31.8305	0.187396	0.172445	1.23341	0.150705
152	YJR060W	CBF1	Dual function helix-loop-helix protein; binds the motif CACRTG present at several sites including MET gene promoters and centromere DNA element I (CDEI); affects nucleosome positioning at this motif; associates with other transcription factors such as Met4p and Isw1p to mediate transcriptional activation or repression; associates with kinetochore proteins and required for efficient chromosome seg…	155	SLEGMTSSPMEST	6.59058	-7	9	510246	5651	7885	eb04472_JV297_phos	eb04472.raw	U	K.PNTSLEGM*TS#SPM*ESTQQSK.N	1	1	10	6	151.908	146.175	157.222	156.683	189.383	193.145	179.835	192.231	152.997	188.648	0.0335743	0.0322831	1.23302	0.000108665
763	YJL197W	UBP12	Ubiquitin carboxyl-terminal hydrolase, ubiquitin-specific protease present in the nucleus and cytoplasm that cleaves ubiquitin from ubiquitinated proteins	1226	SGLGSSSTSEISE	7.71046	-6	5	510246	21618	27829	eb04472_JV297_phos	eb04472.raw	U	K.NNSGLGSSS#TSEISEGCPENEVADLNLK.N	0	0	1	1	40.1042	44.0788	36.8514	29.9564	37.2653	51.6477	51.3726	45.7848	37.7477	46.5176	0.158318	0.144757	1.23233	0.09931
516	YGL023C	PIB2	Protein binding phosphatidylinositol 3-phosphate, involved in telomere-proximal repression of gene expression; similar to Fab1 and Vps27	268	TTTNSSSMSQLRF	17.0091	0	0	510247	7951	11227	eb04473_JV297_phos	eb04473.raw	U	K.LTTTNSSS#MSQLR.F	0	0	3	3	101.981	104.443	84.7374	112.114	133.049	123.212	112.171	128.396	100.819	124.207	0.11463	0.0722475	1.23198	0.0186733
3745	YIL129C	TAO3	Component of the RAM signaling network that is involved in regulation of Ace2p activity and cellular morphogenesis, interacts with protein kinase Cbk1p and also with Kic1p	2352	SLSRTPSNVSFKT	17.0091	0	0	510247	10290	14210	eb04473_JV297_phos	eb04473.raw	U	R.TPS#NVSFK.T	1	1	4	3	254.535	242.265	172.358	184.039	301.69	241.504	255.218	252.657	213.299	262.767	0.192765	0.101317	1.23192	0.0899259
1016	YIL135C	VHS2	Cytoplasmic protein of unknown function; identified as a high-copy suppressor of the synthetic lethality of a sis2 sit4 double mutant, suggesting a role in G1/S phase progression; similar to Mlf3p	28	NNYMPPSPSMSES	20.1669	0	0	510247	15193	20461	eb04473_JV297_phos	eb04473.raw	U	R.ENDNNYM*PPS#PSM*SESSMIFER.N	0	0	6	5	119.273	117.456	101.071	96.4827	133.595	133.17	126.99	141.139	108.571	133.724	0.105802	0.0433132	1.23167	0.00788849
2715	YKL072W	STB6	Protein that binds Sin3p in a two-hybrid assay	514	EYFRRNSIPFCND	51.2519	0	0	510247	8992	12562	eb04473_JV297_phos	eb04473.raw	U	R.RNS#IPFCNDGIHDTK.K	0	0	2	2	108.721	75.9544	95.2203	110.938	83.7105	146.47	157.062	93.7217	97.7085	120.241	0.164575	0.306758	1.23061	0.305545
3043	YLR219W	MSC3	Protein of unknown function, green fluorescent protein (GFP)-fusion protein localizes to the cell periphery; msc3 mutants are defective in directing meiotic recombination events to homologous chromatids; potential Cdc28p substrate	646	VASTTRTRSPELQ	1000	0	0	510246	8766	11837	eb04472_JV297_phos	eb04472.raw	U	R.T#RS#PELQDNLK.S	1	1	3	1	40.7615	41.4698	36.0082	55.8481	68.9531	42.9624	56.6422	45.543	43.5219	53.5252	0.196862	0.221852	1.22984	0.220835
3241	YIL130W	ASG1	Zinc cluster protein proposed to function as a transcriptional regulator involved in the stress response; null mutants have a respiratory deficiency, calcofluor white sensitivity and slightly increased cycloheximide resistance	897	IKIDNNSPSYEGF	0	0	14	510247	22574	29670	eb04473_JV297_phos	eb04473.raw	U	K.IDNNS#PSYEGFPQLQIPLSQDNLNIEDK.E	0	0	1	1	7.8153	15.538	9.45228	14.4424	19.7308	14.8247	12.3081	11.2437	11.812	14.5268	0.318062	0.260226	1.22984	0.347621
1544	YLR310C	CDC25	Membrane bound guanine nucleotide exchange factor (GEF or GDP-release factor); indirectly regulates adenylate cyclase through activation of Ras1p and Ras2p by stimulating the exchange of GDP for GTP; required for progression through G1	421	GPSSLNSLSAPDL	4.08456	-4	12	510247	20343	27005	eb04473_JV297_phos	eb04473.raw	U	K.NEFNEAGPSSLNS#LSAPDLTQNIQSR.V	0	0	1	1	18.0923	13.0448	12.1381	10.1423	9.48192	25.194	14.0028	16.9865	13.3544	16.4163	0.253349	0.402967	1.22928	0.441359
1745	YPL032C	SVL3	Protein of unknown function, mutant phenotype suggests a potential role in vacuolar function; green fluorescent protein (GFP)-fusion protein localizes to the cell periphery, cytoplasm, bud, and bud neck	662	SQTRLNSMPTHSI	15.0073	0	0	510246	4569	6536	eb04472_JV297_phos	eb04472.raw	U	R.LNS#M*PTHSIVNQNR.L	0	0	1	1	54.731	48.0554	46.7929	53.1949	65.6762	48.9957	64.225	70.1583	50.6936	62.2638	0.0761725	0.14774	1.22824	0.0594886
590	YIR003W	AIM21	Protein of unknown function involved in mitochondrial migration along actin filament; may interact with ribosomes; GFP-fusion protein colocalizes with Sac1p to the actin cytoskeleton	277	KIFQNPTDEESTT	47.0452	0	0	510247	18353	24538	eb04473_JV297_phos	eb04473.raw	U	K.IFQNPT#DEESTTSLNEK.Q	2	2	7	3	146.304	147.806	122.12	115.369	169.025	153.591	160.847	168.813	132.9	163.069	0.12481	0.0452351	1.22701	0.0159291
133	YDL019C	OSH2	Member of an oxysterol-binding protein family with seven members in S. cerevisiae; family members have overlapping, redundant functions in sterol metabolism and collectively perform a function essential for viability	783	PPVPNETDNDSQY	6.03896	0	6	510247	7460	10605	eb04473_JV297_phos	eb04473.raw	U	K.HAPPPVPNET#DNDSQYVQDEK.S	0	0	4	3	65.8565	55.4088	46.0226	44.1112	61.5511	61.2082	60.6501	75.9373	52.8498	64.8367	0.188803	0.114283	1.22681	0.101996
4058	YNL121C	TOM70	Component of the TOM (translocase of outer membrane) complex responsible for recognition and initial import steps for all mitochondrially directed proteins; acts as a receptor for incoming precursor proteins	174	VLLRRASANEGLG	1000	0	0	510247	2176	3686	eb04473_JV297_phos	eb04473.raw	U	R.RAS#ANEGLGK.F	0	0	1	1	22.7648	28.3619	25.5045	22.9117	35.8709	31.7842	31.1229	23.3095	24.8857	30.5219	0.105966	0.171901	1.22648	0.10332
3524	YHR154W	RTT107	Protein implicated in Mms22-dependent DNA repair during S phase; involved in recruiting the SMC5/6 complex to double-strand breaks; DNA damage induces phosphorylation by Mec1p at one or more SQ/TQ motifs; interacts with Mms22p and Slx4p; has four BRCT domains; has a role in regulation of Ty1 transposition	720	HLFEGLSDNDDHI	85.2649	0	0	510247	20551	27249	eb04473_JV297_phos	eb04473.raw	U	K.FSHLFEGLS#DNDDHINDEK.P	0	0	1	1	144.296	118.013	132.446	138.32	168.13	167.699	140.795	177.106	133.269	163.433	0.0845085	0.0960781	1.22634	0.0205338
3866	YGL201C	MCM6	Protein involved in DNA replication; component of the Mcm2-7 hexameric complex that binds chromatin as a part of the pre-replicative complex; forms a subcomplex with Mcm4p and Mcm7p	1016	QLEPQDSSxxxxx	38.3994	0	0	510247	21024	27809	eb04473_JV297_phos	eb04473.raw	U	K.TVYVIHPNCEVLDQLEPQDS#S.-	0	0	1	1	26.7083	26.826	26.1187	17.0171	30.0261	31.2538	25.4204	31.8088	24.1675	29.6273	0.19766	0.0979447	1.22591	0.0985588
2312	YIL036W	CST6	Basic leucine zipper (bZIP) transcription factor of the ATF/CREB family, proposed to be a regulator of oleate responsive genes; involved in utilization of non-optimal carbon sources and chromosome stability	396	ALRESHSNPSFTP	20.1669	0	0	510247	3898	5964	eb04473_JV297_phos	eb04473.raw	U	R.ESHS#NPSFTPK.S	0	0	2	2	210.236	198.407	217.965	190.351	295.624	249.686	242.39	213.775	204.24	250.369	0.0600481	0.135472	1.22586	0.0430269
3868	YBL024W	NCL1	S-adenosyl-L-methionine-dependent tRNA: m5C-methyltransferase, methylates cytosine to m5C at several positions in tRNAs and intron-containing pre-tRNAs; similar to Nop2p and human proliferation associated nucleolar protein p120	424	ATEKLSSETPALE	0	-1	12	510247	14671	19800	eb04473_JV297_phos	eb04473.raw	U	K.LSS#ETPALESEGPQTK.K	0	0	2	2	118.221	124.82	123.223	123.198	152.512	143.805	141.476	162.115	122.366	149.977	0.023414	0.0625633	1.22565	0.00134479
1499	YNL330C	RPD3	Histone deacetylase; regulates transcription, silencing, and other processes by influencing chromatin remodeling; forms at least two different complexes which have distinct functions and members	385	NLENTKYAPSVQL	15.0073	0	0	510246	6372	8790	eb04472_JV297_phos	eb04472.raw	U	K.Y#APSVQLNHTPR.D	0	0	3	3	99.7586	114.899	101.612	104.325	140.974	115.906	128.66	129.387	105.149	128.732	0.0643425	0.0795755	1.22428	0.00853884
751	YAR014C	BUD14	Protein involved in bud-site selection, Bud14p-Glc7p complex is a cortical regulator of dynein; inhibitor of the actin assembly factor Bnr1p (formin); diploid mutants display a random budding pattern instead of the wild-type bipolar pattern	378	KGNKSVSFNDVVG	11.0148	-2	7	510247	19529	26034	eb04473_JV297_phos	eb04473.raw	U	K.SVS#FNDVVGYADR.F	0	0	1	1	99.6272	94.4696	80.8128	83.269	114.62	108.427	108.151	106.997	89.5446	109.549	0.100206	0.0313749	1.2234	0.00591991
594	YIR003W	AIM21	Protein of unknown function involved in mitochondrial migration along actin filament; may interact with ribosomes; GFP-fusion protein colocalizes with Sac1p to the actin cytoskeleton	477	LEKKLSSPDTESK	17.0091	0	0	510246	5101	7200	eb04472_JV297_phos	eb04472.raw	U	K.LSS#PDTESK.L	0	0	1	1	47.8359	51.0536	56.2556	63.2327	86.8827	53.2919	61.8871	65.0684	54.5944	66.7825	0.123144	0.214031	1.22325	0.173722
150	YIR006C	PAN1	Part of actin cytoskeleton-regulatory complex Pan1p-Sla1p-End3p, associates with actin patches on the cell cortex; promotes protein-protein interactions essential for endocytosis; previously thought to be a subunit of poly(A) ribonuclease	985	NKSVTESSPFVPS	0	-4	10	510247	14507	19588	eb04473_JV297_phos	eb04473.raw	U	K.SVTES#SPFVPSSTPTPVDDR.S	0	0	1	1	36.9853	37.7878	37.5801	37.7854	42.5292	41.2253	52.4612	47.3928	37.5346	45.9021	0.0100967	0.111434	1.22293	0.0171895
2531	YLR319C	BUD6	Actin- and formin-interacting protein, involved in actin cable nucleation and polarized cell growth; isolated as bipolar budding mutant; potential Cdc28p substrate	689	NPSRSKSNPILPI	1000	0	0	510246	22198	28507	eb04472_JV297_phos	eb04472.raw	U	K.S#NPILPIMR.P	0	0	2	2	258.204	259.57	208.71	208.649	317.575	318.16	265.745	241.969	233.783	285.862	0.124015	0.133668	1.22277	0.0729065
998	YHL007C	STE20	Cdc42p-activated signal transducing kinase of the PAK (p21-activated kinase) family; involved in pheromone response, pseudohyphal/invasive growth, vacuole inheritance, down-regulation of sterol uptake; GBB motif binds Ste4p	224	TPRQINSASHSLS	4.08456	0	2	510246	5648	7882	eb04472_JV297_phos	eb04472.raw	U	R.QINS#ASHS#LSNPK.H	1	1	3	2	82.4909	81.4879	83.4986	98.7831	110.053	107.923	101.051	104.071	86.5651	105.774	0.0945711	0.0378719	1.22191	0.00559037
3621	YDR475C	JIP4	Protein of unknown function; previously annotated as two separate ORFs, YDR474C and YDR475C, which were merged as a result of corrections to the systematic reference sequence	552	SSREEASDDELNA	1000	0	0	510247	15254	20538	eb04473_JV297_phos	eb04473.raw	U	R.EEAS#DDELNAFK.D	0	0	1	1	58.0412	60.0061	80.0425	73.3358	93.2854	90.3802	66.7609	81.2206	67.8564	82.9118	0.156076	0.143909	1.22187	0.108048
1847	YNL212W	VID27	Cytoplasmic protein of unknown function; possibly involved in vacuolar protein degradation; not essential for proteasome-dependent degradation of fructose-1,6-bisphosphatase (FBPase); null mutants exhibit normal growth	375	LHIDDRSNEERDK	1000	0	0	510246	19340	25062	eb04472_JV297_phos	eb04472.raw	U	K.QFDDILHIDDRS#NEER.D	0	0	3	3	115.425	132.142	117.112	119.525	140.707	153.02	138.569	159.056	121.051	147.838	0.0626411	0.0664448	1.22129	0.00499789
3736	YDR200C	VPS64	Protein required for cytoplasm to vacuole targeting of proteins; forms a complex with Far3p and Far7p to Far11p involved in recovery from pheromone-induced cell cycle arrest; mutant has increased aneuploidy tolerance	36	TKTPETSPPKRPM	0	-4	0	510246	3326	4980	eb04472_JV297_phos	eb04472.raw	U	K.TPETS#PPK.R	0	0	1	1	62.0444	53.894	56.0474	58.8411	71.4398	60.2402	72.0305	77.9805	57.7067	70.4227	0.0611796	0.105126	1.22036	0.021097
714	YDR028C	REG1	Regulatory subunit of type 1 protein phosphatase Glc7p, involved in negative regulation of glucose-repressible genes	254	LERGYGSDDENSK	17.0091	0	0	510246	1477	2617	eb04472_JV297_phos	eb04472.raw	U	R.GYGS#DDENSK.R	0	0	2	2	193.757	209.348	210.678	225.85	285.898	241.186	237.652	257.856	209.908	255.648	0.0624722	0.0860839	1.2179	0.0117709
1075	YDL150W	RPC53	RNA polymerase III subunit C53	121	KSEGSGSSLVQKG	6.59058	-5	1	510247	5679	8300	eb04473_JV297_phos	eb04473.raw	U	K.SEGSGS#SLVQK.G	0	0	2	2	132.095	125.966	150.237	130.216	175.02	175.35	165.523	139.845	134.629	163.935	0.0796019	0.101832	1.21768	0.0254612
702	YML007W	YAP1	Basic leucine zipper (bZIP) transcription factor required for oxidative stress tolerance; activated by H2O2 through the multistep formation of disulfide bonds and transit from the cytoplasm to the nucleus; mediates resistance to cadmium	528	KKAANMSDDESSL	58.5514	0	0	510247	12193	16623	eb04473_JV297_phos	eb04473.raw	U	K.AANM*S#DDESSLIK.N	1	1	9	8	421.488	599.377	422.708	491.929	720.986	542.878	498.35	593.728	483.876	588.985	0.173069	0.163402	1.21722	0.150489
3191	YLR072W	YLR072W	Protein of unknown function; green fluorescent protein (GFP)-fusion protein localizes to the cytoplasm in a punctate pattern; YLR072W is not an esssential gene	594	PLPSVTSFGSPRK	6.59058	-3	3	510246	20937	27036	eb04472_JV297_phos	eb04472.raw	U	K.PLPSVTS#FGSPR.K	0	0	1	1	38.1205	40.3126	51.2588	43.8498	61.2955	41.7823	51.3108	56.8472	43.3855	52.8089	0.132653	0.159245	1.2172	0.113871
3109	YKL062W	MSN4	Transcriptional activator related to Msn2p; activated in stress conditions, which results in translocation from the cytoplasm to the nucleus; binds DNA at stress response elements of responsive genes, inducing gene expression	446	FNILKSSPAQDQQ	6.59058	-1	0	510246	10346	13827	eb04472_JV297_phos	eb04472.raw	U	K.SS#PAQDQQFIK.P	0	0	1	1	72.5724	75.1233	62.9076	84.9811	102.744	88.1923	91.3525	77.4244	73.8961	89.9283	0.122762	0.115853	1.21696	0.0593617
147	YIR006C	PAN1	Part of actin cytoskeleton-regulatory complex Pan1p-Sla1p-End3p, associates with actin patches on the cell cortex; promotes protein-protein interactions essential for endocytosis; previously thought to be a subunit of poly(A) ribonuclease	1003	VDDRSSSPSYSQF	17.0091	0	0	510246	8097	10994	eb04472_JV297_phos	eb04472.raw	U	R.SSS#PSYSQFK.T	0	0	3	3	355.895	333.284	367.702	372.626	478.419	415.515	428.15	415.811	357.377	434.474	0.0490489	0.0687779	1.21573	0.00432534
2907	YGR008C	STF2	Protein involved in regulation of the mitochondrial F1F0-ATP synthase; Stf1p and Stf2p may act as stabilizing factors that enhance inhibitory action of the Inh1p protein	69	KKDRRGSNLQSHE	20.1669	0	0	510247	1116	2281	eb04473_JV297_phos	eb04473.raw	U	R.GS#NLQSHEQK.F	0	0	2	2	77.9021	91.6818	59.4203	59.3378	104.743	79.7722	75.4817	90.5178	72.0855	87.6286	0.217987	0.148866	1.21562	0.1788
396	YHR094C	HXT1	Low-affinity glucose transporter of the major facilitator superfamily, expression is induced by Hxk2p in the presence of glucose and repressed by Rgt1p when glucose is limiting	15	SPQKSNSSNSYEL	9.34047	-2	8	510246	1834	3082	eb04472_JV297_phos	eb04472.raw	U	K.SNS#SNSYELESGR.S	0	0	2	2	51.8391	58.9646	66.447	89.9608	92.1234	73.8582	80.3679	78.3553	66.8029	81.1762	0.247753	0.0959515	1.21516	0.167112
3739	YNL157W	IGO1	Protein required for initiation of G0 program; prevents degradation of nutrient-regulated mRNAs via the 5'-3' mRNA decay pathway; phosphorylated by Rim15p; GFP protein localizes to the cytoplasm and nucleus; similar to Igo2p	64	KRKYFDSGDYALQ	2.80603	-3	3	510246	18346	23796	eb04472_JV297_phos	eb04472.raw	U	R.KYFDS#GDYALQK.A	0	0	1	1	24.5453	24.8798	20.1225	15.5664	29.1778	21.163	23.8741	29.2094	21.2785	25.8561	0.205936	0.155077	1.21513	0.174164
3914	YCR054C	CTR86	Essential protein of unknown function; with orthologs in Ashbya gossypii and Candida albicans; similar to human ATXN10, mutations in which cause spinocerebellar ataxia type 10; codon usage corresponds to that observed for yeast genes expressed at low levels	559	ENSEIISIDEDxx	6.03896	-4	0	510247	13628	18453	eb04473_JV297_phos	eb04473.raw	U	K.EEDPGNENSEIIS#IDED.-	0	0	1	1	34.655	32.1491	24.2032	34.2826	41.3091	37.128	33.4237	40.2113	31.3225	38.018	0.155571	0.0930475	1.21376	0.0678354
250	YGR270W	YTA7	Protein that localizes to chromatin and has a role in regulation of histone gene expression; has a bromodomain-like region that interacts with the N-terminal tail of histone H3, and an ATPase domain; potentially phosphorylated by Cdc28p	259	RELQEDSPIREKR	1000	0	0	510246	4050	5889	eb04472_JV297_phos	eb04472.raw	U	R.ELQEDS#PIR.E	0	0	3	3	128.427	117.761	127.293	132.281	167.688	150.62	139.682	155.659	126.441	153.412	0.0487802	0.075752	1.21332	0.00635663
3065	YKL035W	UGP1	UDP-glucose pyrophosphorylase (UGPase), catalyses the reversible formation of UDP-Glc from glucose 1-phosphate and UTP, involved in a wide variety of metabolic pathways, expression modulated by Pho85p through Pho4p	11	KHTKTHSTYAFES	6.59058	-2	14	510247	3921	5996	eb04473_JV297_phos	eb04473.raw	U	K.THS#TYAFESNTNSVAASQM*R.N	0	0	3	2	65.3307	45.5516	69.1432	49.0125	50.5354	77.0804	48.911	101.35	57.2595	69.4693	0.204528	0.357993	1.21324	0.408555
2460	YDR293C	SSD1	Translational repressor with a role in cell wall polar growth and integrity; regulated by Cbk1p phosphorylation to effect bud-specific translational control of specific mRNAs; interacts with TOR pathway components	286	QPQQQLSPFRHRG	9.10728	-8	0	510247	5413	7937	eb04473_JV297_phos	eb04473.raw	U	R.NQSQQPQQQLS#PFR.H	0	0	1	1	29.2895	27.8044	19.1648	24.2448	30.2469	27.7797	34.6607	29.1732	25.1259	30.4651	0.179202	0.0976152	1.2125	0.095162
3513	YNL127W	FAR11	Protein involved in recovery from cell cycle arrest in response to pheromone, in a Far1p-independent pathway; interacts with Far3p, Far7p, Far8p, Far9p, and Far10p; has similarity to the N- and C-termini of N. crassa HAM-2	939	YGHRNSSSQDLLN	0	-1	1	510246	9616	12904	eb04472_JV297_phos	eb04472.raw	U	R.NSS#SQDLLNK.E	0	0	2	2	159.521	134.972	140.212	119.878	194.647	171.505	144.816	161.099	138.646	168.017	0.118071	0.124252	1.21184	0.0687414
827	YJR092W	BUD4	Involved in bud-site selection and required for the axial budding pattern; localizes with septins to bud neck in mitosis and may constitute an axial landmark for next round of budding; required for the formation of a double septin ring, and generally for the organization of septin structures; potential Cdc28p substrate	798	QKLPTNTQDEAEI	20.1669	0	0	510247	15613	21007	eb04473_JV297_phos	eb04473.raw	U	K.LPTNT#QDEAEISIR.E	0	0	1	1	52.0662	47.0875	45.1898	47.9015	58.5416	61.0358	48.577	64.7903	48.0613	58.2362	0.0603732	0.119045	1.21171	0.0352121
893	YER177W	BMH1	14-3-3 protein, major isoform; controls proteome at post-transcriptional level, binds proteins and DNA, involved in regulation of many processes including exocytosis, vesicle transport, Ras/MAPK signaling, and rapamycin-sensitive signaling	238	LWTSDMSESGQAE	0	-7	2	510246	18499	23988	eb04472_JV297_phos	eb04472.raw	U	R.DNLTLWTSDM*S#ESGQAEDQQQQQQHQQQQPPAAAEGEAPK.-	0	0	2	2	92.7798	97.836	42.3271	58.2922	63.0617	106.12	88.6805	95.0153	72.8088	88.2193	0.368971	0.206927	1.21166	0.379292
1725	YGR196C	FYV8	Protein of unknown function, required for survival upon exposure to K1 killer toxin	384	TDDDALSYTESIK	6.59058	-7	4	510247	19902	26484	eb04473_JV297_phos	eb04473.raw	U	K.QLDTTDDDALS#YTESIK.Y	0	0	1	1	29.875	28.2672	26.0458	28.571	34.0001	42.5779	30.2075	29.826	28.1898	34.1529	0.0564167	0.173463	1.21153	0.0998483
3516	YOR322C	LDB19	Protein involved in regulating the endocytosis of plasma membrane proteins by recruiting the ubiquitin ligase Rsp5p to its target; localization changes in response to nutrient levels; null mutant has reduced affinity for alcian blue dye	619	MGPEDITPVNSNK	1000	0	0	510246	7536	10282	eb04472_JV297_phos	eb04472.raw	U	R.M*GPEDIT#PVNS#NK.S	1	1	3	2	48.0151	49.5071	47.9797	56.0834	70.8239	54.6445	55.7763	62.8801	50.3963	61.0312	0.0765455	0.122512	1.21102	0.0447982
2632	YLR045C	STU2	Microtubule-associated protein (MAP) of the XMAP215/Dis1 family; regulates microtubule dynamics during spindle orientation and metaphase chromosome alignment; interacts with spindle pole body component Spc72p	825	LPHRVNSLNIRPY	1000	0	0	510246	8442	11431	eb04472_JV297_phos	eb04472.raw	U	R.VNS#LNIR.P	0	0	2	2	395.055	297.358	327.905	267.595	457.723	411.962	364.297	325.499	321.978	389.87	0.169534	0.147269	1.21086	0.137368
1074	YDL150W	RPC53	RNA polymerase III subunit C53	232	KPTREPTPSVKTE	17.0091	0	0	510246	4399	6325	eb04472_JV297_phos	eb04472.raw	U	R.EPT#PSVK.T	0	0	3	3	311.226	286.386	349.349	342.12	437.493	422.132	429.19	271.686	322.27	390.125	0.0902351	0.203033	1.21055	0.158881
3097	YBR007C	DSF2	Deletion suppressor of mpt5 mutation	57	SNKSSISFESIQT	23.6238	0	0	510246	14275	18726	eb04472_JV297_phos	eb04472.raw	U	K.SSIS#FESIQTTER.L	0	0	1	1	62.7972	66.3181	59.8991	78.8905	90.6941	79.9578	70.4595	83.1188	66.9762	81.0575	0.124899	0.103375	1.21024	0.0548763
2969	YDR517W	GRH1	Acetylated, cis-golgi localized protein involved in ER to Golgi transport; homolog of human GRASP65; forms a complex with the coiled-coil protein Bug1p; mutants are compromised for the fusion of ER-derived vesicles with Golgi membranes	155	DDLDDVSLNHDER	46.1286	0	0	510247	4762	7099	eb04473_JV297_phos	eb04473.raw	U	K.ESDDLDDVS#LNHDER.R	0	0	3	3	171.602	170.087	173.524	211.237	248.308	185.786	216.982	228.054	181.613	219.782	0.109022	0.118814	1.21017	0.0586826
2367	YOL004W	SIN3	Component of the Sin3p-Rpd3p histone deacetylase complex, involved in transcriptional repression and activation of diverse processes, including mating-type switching and meiosis; involved in the maintenance of chromosomal integrity	308	VTTPMGTTTVNNN	6.03896	-5	10	510246	6605	9084	eb04472_JV297_phos	eb04472.raw	U	R.VTTPM*GT#TTVNNNISPSGR.G	0	0	2	2	58.9494	51.3166	57.9837	70.3427	75.1465	69.1244	66.0682	78.2465	59.6481	72.1464	0.132379	0.0768777	1.20953	0.0411864
244	YBL101C	ECM21	Protein involved in regulating the endocytosis of plasma membrane proteins; identified as a substrate for ubiquitination by Rsp5p and deubiquitination by Ubp2p; promoter contains several Gcn4p binding elements	16	AKNSSHSLSETDL	4.08456	-3	9	510247	4442	6678	eb04473_JV297_phos	eb04473.raw	U	K.NSSHS#LSETDLNQSK.G	0	0	1	1	13.7306	16.7899	13.1374	15.6056	16.0124	20.1287	14.3121	21.2059	14.8159	17.9147	0.113716	0.183248	1.20916	0.14403
406	YBL051C	PIN4	Protein involved in G2/M phase progression and response to DNA damage, interacts with Rad53p; contains an RNA recognition motif, a nuclear localization signal, and several SQ/TQ cluster domains; hyperphosphorylated in response to DNA damage	512	RQQATLTPSSRIP	6.59058	-2	3	510246	1302	2393	eb04472_JV297_phos	eb04472.raw	U	R.QQATLT#PSSR.I	0	0	1	1	24.2107	27.2363	19.0087	31.002	29.4567	28.6283	32.2362	32.3528	25.3644	30.6685	0.199755	0.0622252	1.20912	0.097783
1150	YER026C	CHO1	Phosphatidylserine synthase, functions in phospholipid biosynthesis; catalyzes the reaction CDP-diaclyglycerol + L-serine = CMP + L-1-phosphatidylserine, transcriptionally repressed by myo-inositol and choline	47	LSRRASSIFSINT	9.34047	-1	15	510246	23224	29715	eb04472_JV297_phos	eb04472.raw	U	R.ASS#IFSINTTPLAPPNATDIQK.F	0	0	5	5	181.341	149.605	135.476	104.286	95.7953	292.834	98.2797	203.112	142.677	172.505	0.224162	0.548002	1.20906	0.571843
3365	YDR067C	OCA6	Cytoplasmic protein required for replication of Brome mosaic virus in S. cerevisiae, which is a model system for studying positive-strand RNA virus replication; null mutation confers sensitivity to tunicamycin and DTT	213	ARVSSVSNSLPKL	2.80603	-3	2	510246	13069	17230	eb04472_JV297_phos	eb04472.raw	U	R.VSSVS#NSLPK.L	0	0	1	1	106.797	115.047	93.461	98.6524	127.82	137.175	111.763	123.415	103.489	125.043	0.0914111	0.0843701	1.20827	0.0227403
3165	YOL139C	CDC33	Cytoplasmic mRNA cap binding protein and translation initiation factor eIF4E; the eIF4E-cap complex is responsible for mediating cap-dependent mRNA translation via interactions with translation initiation factor eIF4G (Tif4631p or Tif4632p)	22	VDDTTATPKTVLS	0	-3	0	510246	14413	18896	eb04472_JV297_phos	eb04472.raw	U	K.KFEENVS#VDDTTAT#PK.T	1	1	2	1	10.755	9.80464	11.4198	14.6907	17.2092	12.7031	12.2587	14.1574	11.6675	14.0821	0.18184	0.158847	1.20695	0.168304
2701	YER132C	PMD1	Protein with an N-terminal kelch-like domain, putative negative regulator of early meiotic gene expression; required, with Mds3p, for growth under alkaline conditions	959	SSSLAEYVQFGRD	2.94901	-6	11	510247	18306	24478	eb04473_JV297_phos	eb04473.raw	U	R.SSSLAEY#VQFGRDSPVASR.R	0	0	1	1	61.4111	65.9604	63.3448	63.0758	88.0564	72.8372	68.0226	77.2309	63.448	76.5368	0.0296407	0.111724	1.20629	0.0243243
343	YDR162C	NBP2	Protein involved in the HOG (high osmolarity glycerol) pathway, negatively regulates Hog1p by recruitment of phosphatase Ptc1p the Pbs2p-Hog1p complex, found in the nucleus and cytoplasm, contains an SH3 domain that binds Pbs2p	235	KTKLDISDxxxxx	30.6121	0	0	510246	10627	14183	eb04472_JV297_phos	eb04472.raw	U	K.TKLDIS#D.-	0	0	1	1	57.5034	50.5486	34.6341	28.1397	46.0036	41.4242	48.7378	69.856	42.7064	51.5054	0.319291	0.244641	1.20603	0.379801
53	YPL085W	SEC16	COPII vesicle coat protein required for ER transport vesicle budding; Sec16p is bound to the periphery of ER membranes and may act to stabilize initial COPII complexes; interacts with Sec23p, Sec24p and Sec31p	30	EKAASHSEEPLEL	14.966	0	0	510246	21317	27482	eb04472_JV297_phos	eb04472.raw	U	K.AASHS#EEPLELPESTINSSFNDDSVNR.T	0	0	2	2	42.781	50.0542	46.4182	47.7578	67.8957	48.2664	51.1252	58.2496	46.7528	56.3842	0.0651064	0.155139	1.20601	0.0827565
217	YAL019W	FUN30	Conserved member of the Snf2p family with ATP-dependent chromatin remodeling activity; has a role in silencing; potential Cdc28p substrate; authentic, non-tagged protein is detected in purified mitochondria in high-throughput studies	451	EGFDETSAEPTPA	6.59058	-1	4	510246	20465	26479	eb04472_JV297_phos	eb04472.raw	U	K.AVVEGFDETS#AEPTPAPAPAPVER.E	0	0	3	3	69.1069	54.6304	63.8341	70.6695	83.3386	77.7036	69.2473	81.136	64.5602	77.8564	0.112098	0.0795064	1.20595	0.0314792
3067	YOR290C	SNF2	Catalytic subunit of the SWI/SNF chromatin remodeling complex involved in transcriptional regulation; contains DNA-stimulated ATPase activity; functions interdependently in transcriptional activation with Snf5p and Snf6p	716	SHIKEASEEVDDL	22.5294	0	0	510246	17923	23272	eb04472_JV297_phos	eb04472.raw	U	K.EAS#EEVDDLSM*VPK.M	0	0	1	1	43.0559	53.0418	46.7097	44.438	59.9127	59.4844	53.1292	53.1839	46.8113	56.4275	0.0943867	0.0670088	1.20542	0.0162625
3267	YPL009C	TAE2	Protein of unknown function, involved in protein translation; may interact with ribosomes, based on co-purification experiments; green fluorescent protein (GFP)-fusion protein localizes to the cytoplasm	780	DSTKNNSFEHDNL	1000	0	0	510246	6212	8592	eb04472_JV297_phos	eb04472.raw	U	K.NNS#FEHDNLEK.D	0	0	2	2	176.501	159.073	188.4	194.05	204.791	242.857	211.391	206.28	179.506	216.33	0.0861339	0.0827873	1.20514	0.0207776
2781	YLL015W	BPT1	ABC type transmembrane transporter of MRP/CFTR family, found in vacuolar membrane, involved in the transport of unconjugated bilirubin and in heavy metal detoxification via glutathione conjugates, along with Ycf1p	895	TEHRSESEVDEPL	17.0091	0	0	510247	18429	24633	eb04473_JV297_phos	eb04473.raw	U	R.SES#EVDEPLQLK.V	0	0	4	3	227.158	244.643	235.589	245.089	274.79	303.986	265.98	303	238.119	286.939	0.0357736	0.0677998	1.20502	0.00370199
3942	YMR068W	AVO2	Component of a complex containing the Tor2p kinase and other proteins, which may have a role in regulation of cell growth	315	KTPVGVSPKKELV	51.0043	0	0	510247	7317	10426	eb04473_JV297_phos	eb04473.raw	U	K.TPVGVS#PK.K	0	0	1	1	99.7347	109.629	94.9912	90.5097	132.84	114.779	107.174	121.021	98.7162	118.953	0.0829894	0.0912293	1.205	0.0247429
128	YOR217W	RFC1	Subunit of heteropentameric Replication factor C (RF-C), which is a DNA binding protein and ATPase that acts as a clamp loader of the proliferating cell nuclear antigen (PCNA) processivity factor for DNA polymerases delta and epsilon	80	AKRKASSPTVKPA	9.34047	-1	2	510246	2701	4178	eb04472_JV297_phos	eb04472.raw	U	K.ASS#PTVK.P	0	0	2	2	188.953	198.891	181.55	155.664	223.964	248.811	200.072	200.126	181.265	218.243	0.101989	0.106658	1.204	0.0472901
124	YOL116W	MSN1	Transcriptional activator involved in regulation of invertase and glucoamylase expression, invasive growth and pseudohyphal differentiation, iron uptake, chromium accumulation, and response to osmotic stress; localizes to the nucleus	231	SSQSRQSPNLQKV	1000	0	0	510247	3507	5443	eb04473_JV297_phos	eb04473.raw	U	R.QS#PNLQK.V	0	0	1	1	92.6962	83.2658	76.4406	84.1316	93.8083	111.901	88.4455	110.938	84.1335	101.273	0.079215	0.117753	1.20372	0.0459502
1165	YLR371W	ROM2	GDP/GTP exchange factor (GEF) for Rho1p and Rho2p; mutations are synthetically lethal with mutations in rom1, which also encodes a GEF	76	AKQRRRSGVEAAI	25.2382	0	0	510246	17396	22614	eb04472_JV297_phos	eb04472.raw	U	R.S#GVEAAIDDSDIPNNEM*K.G	0	0	2	1	26.3856	29.6664	23.1414	20.8205	35.3248	31.5058	22.7113	30.8053	25.0035	30.0868	0.154238	0.176255	1.2033	0.171999
165	YBR068C	BAP2	High-affinity leucine permease, functions as a branched-chain amino acid permease involved in the uptake of leucine, isoleucine and valine; contains 12 predicted transmembrane domains	26	ISIRSFSAGNNFQ	4.54047	-2	10	510246	9421	12660	eb04472_JV297_phos	eb04472.raw	U	R.SFS#AGNNFQSSSSEK.T	0	0	2	1	44.693	42.0379	50.4989	48.6465	56.5313	57.3893	45.4969	64.1979	46.4691	55.9038	0.0821989	0.138442	1.20303	0.0714363
877	YOL054W	PSH1	E3 ubiquitin ligase that mediates poyubiquitination and degradation of centromere-binding protein Cse4p and prevents Cse4p from mislocalizing to euchromatin; ubiquitylation of Cse4p may be antagonized by Scm3p	143	LAVADDSDDGITR	23.5235	0	0	510246	9638	12931	eb04472_JV297_phos	eb04472.raw	U	K.NSALAVADDS#DDGITR.C	0	0	3	3	96.8906	86.7374	96.3133	106.181	135.373	102.593	115.09	111.421	96.5305	116.119	0.0822705	0.119412	1.20293	0.0496702
4029	YOR086C	TCB1	Lipid-binding protein containing three calcium and lipid binding domains; non-tagged protein localizes to mitochondria and GFP-fusion protein localizes to the cell periphery; C-termini of Tcb1p, Tcb2p and Tcb3p interact	39	TKEETESSKSVSS	20.1669	0	0	510247	1476	2769	eb04473_JV297_phos	eb04473.raw	U	K.TKEETES#SK.S	0	0	1	1	129.729	159.673	116.103	112.925	142.194	167.964	133.621	179.694	129.607	155.868	0.164556	0.138392	1.20262	0.13409
2441	YKR090W	PXL1	LIM domain-containing protein that localizes to sites of polarized growth, required for selection and/or maintenance of polarized growth sites, may modulate signaling by the GTPases Cdc42p and Rho1p; has similarity to metazoan paxillin	464	STTNGGTPIFYKF	33.6572	0	0	510247	17149	22980	eb04473_JV297_phos	eb04473.raw	U	K.GDVDEDAPSESTTNGGT#PIFYK.F	1	1	6	2	72.6919	69.0112	80.1154	90.5097	114.875	77.624	102.807	80.0358	78.082	93.8356	0.12148	0.192259	1.20176	0.17311
1565	YNL166C	BNI5	Protein involved in organization of septins at the mother-bud neck, may interact directly with the Cdc11p septin, localizes to bud neck in a septin-dependent manner	198	ENSEIESFKSPMP	36.5564	0	0	510246	10276	13736	eb04472_JV297_phos	eb04472.raw	U	K.GTEENSEIES#FK.S	0	0	1	1	62.5583	57.092	61.3461	51.1037	73.8567	65.2525	62.0974	77.6903	58.025	69.7242	0.089193	0.104315	1.20162	0.0395239
3040	YLR133W	CKI1	Choline kinase, catalyzing the first step in phosphatidylcholine synthesis via the CDP-choline (Kennedy pathway); exhibits some ethanolamine kinase activity contributing to phosphatidylethanolamine synthesis via the CDP-ethanolamine pathway	97	DSLGSTSSEYIEI	0	-12	3	510246	23297	29802	eb04472_JV297_phos	eb04472.raw	U	R.RASATDVTDSLGSTS#SEYIEIPFVK.E	0	0	1	1	36.4595	38.4927	37.8299	32.296	39.8798	50.1493	38.582	45.7123	36.2695	43.5809	0.076677	0.123121	1.20158	0.0518963
192	YDR171W	HSP42	Small heat shock protein (sHSP) with chaperone activity; forms barrel-shaped oligomers that suppress unfolded protein aggregation; involved in cytoskeleton reorganization after heat shock	215	LAKKSSSFAHLQA	0	-2	21	510246	22168	28472	eb04472_JV297_phos	eb04472.raw	U	K.SSS#FAHLQAPSPIPDPLQVSKPETR.M	0	0	1	1	39.7816	34.5792	31.8026	39.4322	43.2613	49.7515	41.1921	40.6949	36.3989	43.725	0.106499	0.0953361	1.20127	0.0421098
162	YBR068C	BAP2	High-affinity leucine permease, functions as a branched-chain amino acid permease involved in the uptake of leucine, isoleucine and valine; contains 12 predicted transmembrane domains	76	QINENTSDLEDGV	17.0091	0	0	510246	21535	27733	eb04472_JV297_phos	eb04472.raw	U	K.QINENTS#DLEDGVESITSDSK.L	1	1	6	4	225.186	218.195	229.499	222.569	283.121	263.861	257.383	270.586	223.862	268.738	0.0211591	0.0409337	1.20046	0.000291916
730	YJL146W	IDS2	Protein involved in modulation of Ime2p activity during meiosis, appears to act indirectly to promote Ime2p-mediated late meiotic functions; found in growing cells and degraded during sporulation	136	SPIRQPSVDVPPL	64.3979	0	0	510247	15464	20816	eb04473_JV297_phos	eb04473.raw	U	R.QPS#VDVPPLTTR.R	0	0	2	2	187.077	227.2	202.298	211.224	282.227	226.229	234.065	251.061	206.95	248.395	0.0810928	0.0999286	1.20027	0.0325739
2834	YER047C	SAP1	Putative ATPase of the AAA family, interacts with the Sin1p transcriptional repressor in the two-hybrid system	460	NSKKVASNPALNT	42.8692	0	0	510247	8748	12250	eb04473_JV297_phos	eb04473.raw	U	K.VAS#NPALNTTK.K	0	0	1	1	26.9951	35.5366	26.9203	24.0619	43.9468	28.3499	28.216	35.7018	28.3784	34.0536	0.174907	0.219229	1.19998	0.252422
2740	YLR177W	YLR177W	Putative protein of unknown function; phosphorylated by Dbf2p-Mob1p in vitro; some strains contain microsatellite polymophisms at this locus; YLR177W is not an essential gene	34	KNNSGKSLADLPG	1000	0	0	510246	15821	20643	eb04472_JV297_phos	eb04472.raw	U	K.S#LADLPGK.M	0	0	2	2	277.754	277.97	254.556	208.061	338.874	325.241	259.226	298.321	254.585	305.415	0.129247	0.114931	1.19966	0.0790478
3933	YGR048W	UFD1	Protein that interacts with Cdc48p and Npl4p, involved in recognition of polyubiquitinated proteins and their presentation to the 26S proteasome for degradation; involved in transporting proteins from the ER to the cytosol	354	KSKAPKSPEVIEI	1000	0	0	510247	15577	20963	eb04473_JV297_phos	eb04473.raw	U	K.S#PEVIEID.-	0	0	1	1	196.028	196.166	184.621	202.167	222.976	234.344	232.779	244.351	194.746	233.612	0.0376447	0.0374543	1.19958	0.000491586
342	YLR079W	SIC1	Inhibitor of Cdc28-Clb kinase complexes that controls G1/S phase transition, preventing premature S phase and ensuring genomic integrity; phosphorylation targets Sic1p for SCF(CDC4)-dependent turnover; functional homolog of mammalian Kip1	173	IKDVPGTPSDKVI	20.1669	0	0	510246	4118	5974	eb04472_JV297_phos	eb04472.raw	U	K.DVPGT#PSDK.V	0	0	3	2	88.7168	88.2207	87.3711	96.9663	119.547	104.449	102.683	106.67	90.3187	108.337	0.0494518	0.0706018	1.1995	0.00658632
733	YDL035C	GPR1	Plasma membrane G protein coupled receptor (GPCR) that interacts with the heterotrimeric G protein alpha subunit, Gpa2p, and with Plc1p; sensor that integrates nutritional signals with the modulation of cell fate via PKA and cAMP synthesis	592	ADRCENSSFTNVQ	0	0	14	510246	15659	20442	eb04472_JV297_phos	eb04472.raw	U	R.CENS#SFTNVQQHFQAQTYK.Q	0	0	2	2	58.6148	33.5062	41.3381	28.4926	27.981	81.549	24.6534	60.0631	40.4879	48.5616	0.325779	0.55962	1.19941	0.612184
3363	YAL035W	FUN12	GTPase, required for general translation initiation by promoting Met-tRNAiMet binding to ribosomes and ribosomal subunit joining; homolog of bacterial IF2	258	RAALLSSGNVKVA	6.59058	-1	0	510246	15196	19867	eb04472_JV297_phos	eb04472.raw	U	R.AALLSS#GNVK.V	0	0	1	1	48.9233	48.7918	47.7507	41.5757	50.2914	60.8501	59.4131	53.7401	46.7603	56.0737	0.0747648	0.0878795	1.19917	0.0215827
1639	YJR138W	IML1	Subunit of the SEA (Seh1-associated) complex, a coatomer-related complex that associates dynamically with the vacuole; has an N-terminal CDC48-like domain and a C-terminal DEP domain; central region is readily accessible to proteases	845	QLKHRISETWVDI	4.08456	0	2	510246	15844	20671	eb04472_JV297_phos	eb04472.raw	U	K.HRIS#ETWVDIK.S	0	0	1	1	67.6489	65.9499	71.6104	84.7067	98.0728	86.1767	86.1818	76.9891	72.479	86.8551	0.117134	0.0995069	1.19835	0.0552722
146	YIR006C	PAN1	Part of actin cytoskeleton-regulatory complex Pan1p-Sla1p-End3p, associates with actin patches on the cell cortex; promotes protein-protein interactions essential for endocytosis; previously thought to be a subunit of poly(A) ribonuclease	1281	DEDDGWSDEDESN	41.3022	0	0	510246	5754	8016	eb04472_JV297_phos	eb04472.raw	U	R.GLDEDEDDGWS#DEDESNNR.V	0	0	3	2	28.7995	26.8155	23.9534	18.9254	31.8156	28.9333	20.695	36.4755	24.6234	29.4799	0.174144	0.224896	1.19723	0.264686
268	YMR216C	SKY1	SR protein kinase (SRPK) involved in regulating proteins involved in mRNA metabolism and cation homeostasis; similar to human SRPK1	445	IKNSNNSFLNSVP	15.0073	0	0	510247	12002	16380	eb04473_JV297_phos	eb04473.raw	U	K.NSNNS#FLNSVPHSVTR.M	0	0	2	1	53.4165	45.3938	36.0811	43.7584	54.5675	51.9925	52.8075	54.3929	44.6624	53.4401	0.159178	0.0233588	1.19653	0.0510133
3590	YOR373W	NUD1	Component of the spindle pole body outer plaque, required for exit from mitosis	419	RTSRSISNSNLLE	4.08456	-2	2	510247	12734	17310	eb04473_JV297_phos	eb04473.raw	U	R.SIS#NSNLLEAHK.K	0	0	2	2	229.368	225.349	196.801	171.112	250.295	261.209	216.042	256.417	205.658	245.991	0.132325	0.0831708	1.19612	0.0555749
3066	YOR290C	SNF2	Catalytic subunit of the SWI/SNF chromatin remodeling complex involved in transcriptional regulation; contains DNA-stimulated ATPase activity; functions interdependently in transcriptional activation with Snf5p and Snf6p	1375	LRQFEVSDDEKND	1000	0	0	510246	8784	11859	eb04472_JV297_phos	eb04472.raw	U	R.QFEVS#DDEK.N	0	0	2	2	152.625	149.026	122.328	107.801	142.728	170.179	145.917	176.889	132.945	158.928	0.16196	0.10782	1.19544	0.107888
1949	YNL136W	EAF7	Subunit of the NuA4 histone acetyltransferase complex, which acetylates the N-terminal tails of histones H4 and H2A	214	PIKEVQSDEKELQ	1000	0	0	510246	1638	2826	eb04472_JV297_phos	eb04472.raw	U	K.EVQS#DEK.E	0	0	1	1	19.5622	18.2838	18.0926	16.2721	24.9946	17.4767	23.0453	20.7223	18.0527	21.5597	0.0750289	0.150006	1.19427	0.092369
2436	YIL147C	SLN1	Histidine kinase osmosensor that regulates a MAP kinase cascade; transmembrane protein with an intracellular kinase domain that signals to Ypd1p and Ssk1p, thereby forming a phosphorelay system similar to bacterial two-component regulators	833	FNKAPGSDDEEGG	1000	0	0	510246	8899	12000	eb04472_JV297_phos	eb04472.raw	U	K.APGS#DDEEGGNLGRPIENPK.T	0	0	1	1	44.0716	38.4401	33.1975	45.4183	44.2373	47.2852	46.8576	53.9819	40.2819	48.0905	0.139201	0.0863425	1.19385	0.0665033
1091	YNL074C	MLF3	Serine-rich protein of unknown function, predicted to be palmitoylated; overproduction suppresses the growth inhibition caused by exposure to the immunosuppressant leflunomide	297	ATSPYVSPQQSAR	11.0148	-11	4	510246	11499	15270	eb04472_JV297_phos	eb04472.raw	U	K.TTELPATSPYVS#PQQSAR.Q	0	0	2	2	70.4094	74.934	71.3397	72.2248	96.5854	84.6253	78.3145	85.1861	72.227	86.1778	0.0270113	0.088257	1.19315	0.012022
2132	YKL168C	KKQ8	Putative serine/threonine protein kinase with unknown cellular role	212	ALRRATSYPNPLP	9.34047	-1	7	510246	15180	19848	eb04472_JV297_phos	eb04472.raw	U	R.ATS#YPNPLPSK.Q	0	0	2	2	105.985	117.529	118.965	125.773	171.151	131.937	132.829	122.726	117.063	139.661	0.0701703	0.153834	1.19304	0.0970345
745	YNL243W	SLA2	Transmembrane actin-binding protein involved in membrane cytoskeleton assembly and cell polarization; adaptor protein that links actin to clathrin and endocytosis; present in the actin cortical patch of the emerging bud tip; dimer in vivo	286	KREPSVTPARTPA	4.08456	-2	0	510246	1293	2382	eb04472_JV297_phos	eb04472.raw	U	K.KREPSVT#PAR.T	0	0	1	1	49.6044	43.1425	41.4422	42.8827	55.4971	58.5827	41.3653	55.6745	44.268	52.7799	0.0821228	0.146649	1.19228	0.0936147
3228	YDL117W	CYK3	SH3-domain protein located in the mother-bud neck and the cytokinetic actin ring; mutant phenotype and genetic interactions suggest a role in cytokinesis	105	PVPSRYSDERPRP	17.0091	0	0	510246	1275	2360	eb04472_JV297_phos	eb04472.raw	U	R.YS#DERPRPK.K	0	0	1	1	134.963	111.817	127.585	133.693	160.623	150.939	153.598	140.329	127.015	151.372	0.0837014	0.0556241	1.19177	0.0114747
65	YPL085W	SEC16	COPII vesicle coat protein required for ER transport vesicle budding; Sec16p is bound to the periphery of ER membranes and may act to stabilize initial COPII complexes; interacts with Sec23p, Sec24p and Sec31p	706	NSAISQSPVNYAF	2.01746	-7	10	510246	21592	27799	eb04472_JV297_phos	eb04472.raw	U	R.TNSAISQS#PVNYAFPNPYK.I	0	0	2	1	45.9836	45.4885	59.7013	47.2611	56.1595	63.9132	62.2953	54.0786	49.6086	59.1116	0.136464	0.0800891	1.19156	0.0610408
305	YIL115C	NUP159	Nucleoporin, subunit of the Nup82 subcomplex of the nuclear pore; part of the nuclear pore that is found exclusively on the cytoplasmic side; required for mRNA export; regulates ADP release from the ATP-dependent RNA helicase Dbp5p	404	EHEKSLSPTSEKI	17.0091	0	0	510246	5398	7570	eb04472_JV297_phos	eb04472.raw	U	K.SLS#PTSEK.I	0	0	3	3	331.254	340.333	311.904	290.298	418.831	360.102	354.24	383.664	318.447	379.209	0.0697053	0.0773088	1.19081	0.0163097
717	YDR028C	REG1	Regulatory subunit of type 1 protein phosphatase Glc7p, involved in negative regulation of glucose-repressible genes	977	ASLTDSSNESLHK	17.0091	0	0	510247	7430	10568	eb04473_JV297_phos	eb04473.raw	U	K.EASLTDSS#NES#LHK.V	1	1	3	1	16.013	18.5783	11.3261	16.1937	23.5537	17.8347	15.1904	17.3371	15.5278	18.479	0.195475	0.193325	1.19006	0.254764
2131	YKL168C	KKQ8	Putative serine/threonine protein kinase with unknown cellular role	21	RRVRSFSESFKNL	11.0148	-2	2	510246	14709	19263	eb04472_JV297_phos	eb04472.raw	U	R.SFS#ESFK.N	0	0	1	1	136.565	123.536	120.923	126.949	154.558	156.627	136.948	156.312	126.993	151.111	0.0538726	0.0627731	1.18992	0.00618609
1546	YHR099W	TRA1	Subunit of SAGA and NuA4 histone acetyltransferase complexes; interacts with acidic activators (e.g., Gal4p) which leads to transcription activation; similar to human TRRAP, which is a cofactor for c-Myc mediated oncogenic transformation	542	KEDINDSPDVEMT	44.3948	0	0	510247	10799	14859	eb04473_JV297_phos	eb04473.raw	U	K.KEDINDS#PDVEMTESDK.V	0	0	3	3	88.6332	94.3328	94.6165	92.1958	106.381	108.586	105.194	119.389	92.4446	109.888	0.029868	0.0590431	1.18869	0.0025843
2029	YML115C	VAN1	Component of the mannan polymerase I, which contains Van1p and Mnn9p and is involved in the first steps of mannan synthesis; mutants are vanadate-resistant	25	GLSLPISRNGSSN	18.8054	0	0	510246	20331	26318	eb04472_JV297_phos	eb04472.raw	U	K.AMDNGLSLPIS#R.N	0	0	5	4	200.449	222.319	182.446	228.411	279.647	227.329	233.286	250.626	208.406	247.722	0.10107	0.0947252	1.18865	0.0469302
2088	YPL075W	GCR1	Transcriptional activator of genes involved in glycolysis; DNA-binding protein that interacts and functions with the transcriptional activator Gcr2p	515	VNEDSPSSSSKLA	11.0148	-2	3	510246	1891	3154	eb04472_JV297_phos	eb04472.raw	U	K.VNEDSPS#SSSK.L	0	0	3	3	106.032	111.659	113.448	120.571	137.836	136.392	135.241	127.32	112.928	134.197	0.0530925	0.035071	1.18835	0.00140522
579	YOR123C	LEO1	Component of the Paf1 complex; which associates with RNA polymerase II and is involved in histone methylation; plays a role in regulating Ty1 transposition; involved in transcription elongation as demonstrated by the G-less-based run-on (GLRO) assay	339	ELERKQSQILRDR	1000	0	0	510247	4119	6252	eb04473_JV297_phos	eb04473.raw	U	R.KQS#QILR.D	0	0	1	1	63.5023	57.355	45.627	38.4389	80.3639	59.4711	60.4151	43.2459	51.2308	60.874	0.220588	0.249636	1.18823	0.347777
3741	YIL095W	PRK1	Protein serine/threonine kinase; regulates the organization and function of the actin cytoskeleton and reduces endocytic ability of cell through the phosphorylation of the Pan1p-Sla1p-End3p protein complex	484	VPNLKLSPTITSK	17.0091	0	0	510246	13642	17942	eb04472_JV297_phos	eb04472.raw	U	K.LS#PTITSK.S	0	0	3	3	361.093	343.657	367.702	382.467	407.711	472.016	426.048	422.292	363.73	432.017	0.0442386	0.064383	1.18774	0.00537905
2313	YIL036W	CST6	Basic leucine zipper (bZIP) transcription factor of the ATF/CREB family, proposed to be a regulator of oleate responsive genes; involved in utilization of non-optimal carbon sources and chromosome stability	90	TTSNRNSLTPQYS	0	0	14	510246	9673	12976	eb04472_JV297_phos	eb04472.raw	U	R.NS#LTPQYSIAAGNVNSHDR.V	0	0	1	1	18.5584	17.2318	20.8825	18.8731	26.6214	22.2768	17.9736	22.8259	18.8864	22.4244	0.0798908	0.15789	1.18733	0.115609
272	YOR276W	CAF20	Phosphoprotein of the mRNA cap-binding complex involved in translational control, repressor of cap-dependent translation initiation, competes with eIF4G for binding to eIF4E	91	EAKKKGSGEDDEE	34.0887	0	0	510247	21460	28324	eb04473_JV297_phos	eb04473.raw	U	K.KGS#GEDDEEETETTPT#STVPVATIAQETLK.V	1	1	4	3	185.691	170.087	167.393	127.602	77.7494	241.014	209.053	244.762	162.693	193.145	0.152099	0.406851	1.18717	0.487664
806	YJL123C	MTC1	Protein of unknown function that may interact with ribosomes; green fluorescent protein (GFP)-fusion protein localizes to the cytoplasm and to COPI-coated vesicles (early Golgi); mtc1 is synthetically lethal with cdc13-1	75	LEKSNLSLTDKKG	17.0091	0	0	510247	9795	13591	eb04473_JV297_phos	eb04473.raw	U	K.SNLS#LTDK.K	1	1	5	2	224.517	222.351	237.921	236.554	340.199	248.797	253.882	250.517	230.335	273.349	0.034896	0.163223	1.18674	0.106527
515	YGL023C	PIB2	Protein binding phosphatidylinositol 3-phosphate, involved in telomere-proximal repression of gene expression; similar to Fab1 and Vps27	165	FTDDQRSNPELDP	46.1286	0	0	510247	13698	18541	eb04473_JV297_phos	eb04473.raw	U	R.S#NPELDPTNSVVDVSR.G	0	0	3	2	60.4072	71.6307	63.8133	65.6898	89.1022	71.7896	65.6847	83.7958	65.3853	77.5931	0.0719248	0.13849	1.18671	0.0825649
927	YDR239C	YDR239C	Protein of unknown function that may interact with ribosomes, based on co-purification experiments	74	AHSRSHSIQAPLQ	31.2747	0	0	510246	7824	10646	eb04472_JV297_phos	eb04472.raw	U	R.SHS#IQAPLQK.E	0	0	2	2	219.163	183.227	195.042	176.798	259.986	226.521	213.605	218.442	193.557	229.638	0.0964454	0.0911057	1.18641	0.0421288
1636	YNR019W	ARE2	Acyl-CoA:sterol acyltransferase, isozyme of Are1p; endoplasmic reticulum enzyme that contributes the major sterol esterification activity in the presence of oxygen	175	NLHHRKSSPDAVD	22.5294	0	0	510247	7698	10903	eb04473_JV297_phos	eb04473.raw	U	R.KS#S#PDAVDSVGK.N	1	1	3	2	80.8418	85.454	77.8876	95.4763	113.225	96.8378	93.4925	99.3798	84.9149	100.734	0.0906632	0.0860645	1.18629	0.0342449
3010	YNL098C	RAS2	GTP-binding protein that regulates the nitrogen starvation response, sporulation, and filamentous growth; farnesylation and palmitoylation required for activity and localization to plasma membrane; homolog of mammalian Ras proto-oncogenes	225	GKNVNSSTTVVNA	0	-1	2	510246	2475	3889	eb04472_JV297_phos	eb04472.raw	U	K.NVNSS#TTVVNAR.N	0	0	1	1	38.957	40.4178	31.0843	35.5765	41.0186	47.1923	35.0566	49.9559	36.5089	43.3058	0.113562	0.153525	1.18617	0.133441
1095	YNL074C	MLF3	Serine-rich protein of unknown function, predicted to be palmitoylated; overproduction suppresses the growth inhibition caused by exposure to the immunosuppressant leflunomide	244	LAQANNTPTSRPP	7.97117	0	3	510247	7041	10085	eb04473_JV297_phos	eb04473.raw	U	K.LAQANNT#PTSRPPMK.S	0	0	1	1	64.5897	75.9228	66.3846	56.567	79.2368	83.2861	69.9523	79.8665	65.866	78.0854	0.120668	0.0730799	1.18552	0.0466707
1039	YER052C	HOM3	Aspartate kinase (L-aspartate 4-P-transferase); cytoplasmic enzyme that catalyzes the first step in the common pathway for methionine and threonine biosynthesis; expression regulated by Gcn4p and the general control of amino acid synthesis	332	VAKKGESTPPHPP	7.71046	0	1	510246	17192	22358	eb04472_JV297_phos	eb04472.raw	U	K.KGES#TPPHPPENLS#SSFYEK.R	1	1	11	6	290.074	336.651	300.464	298.362	363.09	353.18	305.861	430.585	306.388	363.179	0.0674563	0.141556	1.18536	0.0862542
826	YJR092W	BUD4	Involved in bud-site selection and required for the axial budding pattern; localizes with septins to bud neck in mitosis and may constitute an axial landmark for next round of budding; required for the formation of a double septin ring, and generally for the organization of septin structures; potential Cdc28p substrate	91	GLLRVNSELEESP	30.6121	0	0	510246	6726	9238	eb04472_JV297_phos	eb04472.raw	U	R.VNS#ELEESPAAVHQER.I	0	0	1	1	19.5861	19.5462	16.7601	14.1679	21.1949	19.7309	19.5446	22.572	17.515	20.7606	0.148106	0.0681703	1.1853	0.0704295
3023	YHR102W	KIC1	Protein kinase of the PAK/Ste20 family, required for cell integrity; physically interacts with Cdc31p (centrin), which is a component of the spindle pole body; part of the RAM network that regulates cellular polarity and morphogenesis	1073	KEQLISTPIKDNE	9.34047	-1	0	510246	17188	22354	eb04472_JV297_phos	eb04472.raw	U	K.EQLIST#PIK.D	0	0	4	4	405.428	451.624	351.671	371.005	463.998	484.626	434.385	489.367	394.932	468.094	0.111029	0.0534641	1.18525	0.0273982
2600	YOR208W	PTP2	Phosphotyrosine-specific protein phosphatase involved in the inactivation of mitogen-activated protein kinase (MAPK) during osmolarity sensing; dephosporylates Hog1p MAPK and regulates its localization; localized to the nucleus	258	KDLIHYSPNSLQK	30.8348	0	0	510246	18336	23784	eb04472_JV297_phos	eb04472.raw	U	K.DLIHYS#PNSLQK.F	0	0	1	1	48.2302	42.1221	44.7005	50.5417	66.6291	50.1493	44.7176	58.3947	46.3986	54.9727	0.0803453	0.174485	1.18479	0.146696
3352	YOL092W	YOL092W	Putative protein of unknown function; predicted to contain six transmembrane domains and is 58% similar to the uncharacterized ORF YBR147W	147	EMAAPSSDGNAGD	6.59058	-1	0	510246	10078	13487	eb04472_JV297_phos	eb04472.raw	U	R.IDEEMAAPSS#DGNAGDDNLR.E	0	0	2	2	44.1791	40.1654	49.4163	39.2884	48.804	57.8401	41.3529	56.9318	43.2623	51.2322	0.106842	0.151045	1.18422	0.127407
1956	YDR217C	RAD9	DNA damage-dependent checkpoint protein, required for cell-cycle arrest in G1/S, intra-S, and G2/M; transmits checkpoint signal by activating Rad53p and Chk1p; hyperphosphorylated by Mec1p and Tel1p; potential Cdc28p substrate	937	SMTNVLSPKKHTD	18.8054	0	0	510247	14595	19700	eb04473_JV297_phos	eb04473.raw	U	K.SMTNVLS#PK.K	0	0	1	1	23.4101	27.9832	32.5417	34.5701	38.1717	31.9964	31.6796	38.4704	29.6263	35.0795	0.16796	0.106821	1.18407	0.130533
3327	YBR196C	PGI1	Glycolytic enzyme phosphoglucose isomerase, catalyzes the interconversion of glucose-6-phosphate and fructose-6-phosphate; required for cell cycle progression and completion of the gluconeogenic events of sporulation	460	VKAEGATGGLVPH	1000	0	0	510246	9336	12549	eb04472_JV297_phos	eb04472.raw	U	K.AEGAT#GGLVPHK.V	0	0	1	1	65.2589	63.141	61.1171	61.808	80.7706	64.7618	77.0033	74.9338	62.8313	74.3674	0.0290214	0.0920347	1.1836	0.0173061
1960	YJL201W	ECM25	Non-essential protein of unknown function; promoter contains a consensus binding sequence for factor Abf1p	436	SSRNVSSPSFNAK	0	-1	2	510247	20739	27471	eb04473_JV297_phos	eb04473.raw	U	R.NVSS#PSFNAKPPLPIK.A	0	0	1	1	38.2041	33.4641	24.578	24.9506	40.9373	29.4902	31.5559	41.4566	30.2992	35.86	0.220449	0.173553	1.18353	0.268874
369	YPL249C	GYP5	GTPase-activating protein (GAP) for yeast Rab family members; involved in ER to Golgi trafficking; exhibits GAP activity toward Ypt1p that is stimulated by Gyl1p, also acts on Sec4p; interacts with Gyl1p, Rvs161p and Rvs167p; involved in recruiting Rvs167p to the bud tip during polarized growth	295	NVATSTSPKLPPR	0	-3	0	510246	2322	3693	eb04472_JV297_phos	eb04472.raw	U	R.QNVATSTS#PK.L	0	0	1	1	70.2062	73.356	81.9475	86.3535	96.9457	85.3148	96.8076	89.8892	77.9658	92.2393	0.0958873	0.0614846	1.18307	0.0227384
2857	YNL163C	RIA1	Cytoplasmic GTPase involved in biogenesis of the 60S ribosome; has similarity to translation elongation factor 2 (Eft1p and Eft2p)	430	ESKRIASSDELME	9.34047	0	1	510246	10843	14448	eb04472_JV297_phos	eb04472.raw	U	R.IAS#SDELMER.S	0	0	1	1	57.2883	41.817	48.4794	40.3079	59.355	55.5594	56.1103	51.2495	46.9731	55.5685	0.164757	0.0599421	1.18299	0.0874043
358	YDL195W	SEC31	Component of the Sec13p-Sec31p complex of the COPII vesicle coat, required for vesicle formation in ER to Golgi transport; mutant has increased aneuploidy tolerance	349	ETKQQESETDFWN	4.08456	0	9	510246	14266	18715	eb04472_JV297_phos	eb04472.raw	U	K.QQES#ETDFWNNVSR.E	0	0	1	1	44.8723	55.1248	48.4169	58.6582	67.7795	60.5849	58.8317	57.766	51.768	61.2405	0.120904	0.0736692	1.18298	0.0494233
424	YOR042W	CUE5	Protein containing a CUE domain that binds ubiquitin, which may facilitate intramolecular monoubiquitination; green fluorescent protein (GFP)-fusion protein localizes to the cytoplasm in a punctate pattern	36	TDVDLNSDGKKDN	34.0887	0	0	510246	7501	10236	eb04472_JV297_phos	eb04472.raw	U	K.TTDVDLNS#DGK.K	0	0	2	1	56.0933	58.144	61.471	67.4412	78.7952	62.5607	68.5669	77.7145	60.7874	71.9093	0.0815724	0.107624	1.18296	0.0518584
2368	YLR425W	TUS1	Guanine nucleotide exchange factor (GEF) that functions to modulate Rho1p activity as part of the cell integrity signaling pathway; multicopy suppressor of tor2 mutation and ypk1 ypk2 double mutation; potential Cdc28p substrate	173	NGFSPNSPKSPRD	23.6238	0	0	510246	17873	23212	eb04472_JV297_phos	eb04472.raw	U	K.SPFANGFSPNS#PK.S	0	0	1	1	46.2226	53.7151	47.0324	50.9861	65.9784	57.5351	55.6897	54.9611	49.489	58.5411	0.0707763	0.0866936	1.18291	0.0260868
3326	YGR097W	ASK10	Component of RNA polymerase II holoenzyme, phosphorylated in response to oxidative stress; has a role in destruction of Ssn8p; proposed to function in activation of the glycerol channel Fps1p; paralogous to Rgc1p	1045	TLKKTNSTGNVPC	6.59058	-2	8	510246	12462	16477	eb04472_JV297_phos	eb04472.raw	U	K.TNS#TGNVPCLTAEK.T	0	0	2	2	120.432	69.7266	82.7283	73.9631	93.8547	120.838	101.805	93.7459	86.7125	102.561	0.266657	0.124374	1.18277	0.27526
1739	YKL088W	CAB3	Subunit of a phosphopantothenoylcysteine decarboxylase (PPCDC; Cab3p, Sis2p, Vhs3p) complex, which catalyzes the third step of coenzyme A biosynthesis; null mutant lethality is complemented by E. coli coaBC	116	GQQKRFSPSLPSA	31.2747	0	0	510246	22710	29111	eb04472_JV297_phos	eb04472.raw	U	K.RFS#PSLPSAVSFTVPEVER.L	0	0	2	2	88.9678	102.191	93.7212	96.9663	78.8998	126.355	115.647	130.729	95.4616	112.908	0.0582467	0.208493	1.18275	0.199253
3475	YDL146W	LDB17	Protein involved in the regulation of endocytosis; transiently recruited to actin cortical patches in a SLA1-dependent manner after late coat component assembly; GFP-fusion protein localizes to the periphery, cytoplasm, bud, and bud neck	193	DEMKQISTVLMDL	6.59058	0	1	510246	23091	29557	eb04472_JV297_phos	eb04472.raw	U	K.QIS#TVLM*DLLFQIM*K.Y	0	0	1	1	52.9624	60.753	55.9225	53.3779	64.7815	65.7166	63.7426	69.4812	55.754	65.9305	0.0642175	0.0379294	1.18253	0.00346587
3510	YJL026W	RNR2	Ribonucleotide-diphosphate reductase (RNR), small subunit; the RNR complex catalyzes the rate-limiting step in dNTP synthesis and is regulated by DNA replication and DNA damage checkpoint pathways via localization of the small subunits	15	AAADALSDLEIKD	1000	0	0	510246	22650	29041	eb04472_JV297_phos	eb04472.raw	U	K.AAADALS#DLEIK.D	0	0	2	2	119.906	119.413	149.665	135.052	181.26	144.03	152.262	142.118	131.009	154.918	0.10992	0.116868	1.1825	0.0842343
688	YMR219W	ESC1	Protein localized to the nuclear periphery, involved in telomeric silencing; interacts with PAD4-domain of Sir4p	918	DLEDDESLKKELT	22.5294	0	0	510247	8347	11738	eb04473_JV297_phos	eb04473.raw	U	R.NSDLEDDES#LKK.E	0	0	1	1	59.1645	50.8221	72.3599	71.8719	77.18	79.1887	75.3333	68.8405	63.5546	75.1356	0.164549	0.0596573	1.18222	0.087968
1693	YHR082C	KSP1	Ser/thr protein kinase; nuclear translocation required for haploid filamentous growth; regulates filamentous growth induced nuclear translocation of Bcy1p, Fus3p, and Sks1p; overproduction causes allele-specific suppression of prp20-10	526	NTRDFFTPPSVQH	1000	0	0	510246	15207	19881	eb04472_JV297_phos	eb04472.raw	U	R.DFFT#PPS#VQHR.Y	1	1	3	1	102.4	98.6881	85.9658	82.1057	122.498	101.943	98.6631	113.259	92.2898	109.091	0.105954	0.0999908	1.18205	0.0616263
1991	YER129W	SAK1	Upstream serine/threonine kinase for the SNF1 complex; partially redundant with Elm1p and Tos3p; members of this family have functional orthology with LKB1, a mammalian kinase associated with Peutz-Jeghers cancer-susceptibility syndrome	40	LRSPTKSSATNLA	9.34047	0	3	510246	9291	12494	eb04472_JV297_phos	eb04472.raw	U	K.S#SATNLAGMAEGAR.D	0	0	2	2	119.142	109.987	94.8872	106.233	130.434	131.115	117.317	129.605	107.562	127.118	0.0933379	0.0516288	1.18181	0.0172313
3806	YKR072C	SIS2	Negative regulatory subunit of protein phosphatase 1 Ppz1p and also a subunit of the phosphopantothenoylcysteine decarboxylase (PPCDC; Cab3p, Sis2p, Vhs3p) complex, which catalyzes the third step of coenzyme A biosynthesis	47	KDSIINSPVSGRQ	11.0148	-4	3	510247	5897	8582	eb04473_JV297_phos	eb04473.raw	U	K.DSIINS#PVSGR.Q	0	0	1	1	32.6952	30.0662	27.4095	30.8975	41.251	41.6364	35.4029	24.7603	30.2671	35.7627	0.072634	0.220058	1.18157	0.227198
476	YHR158C	KEL1	Protein required for proper cell fusion and cell morphology; functions in a complex with Kel2p to negatively regulate mitotic exit, interacts with Tem1p and Lte1p; localizes to regions of polarized growth; potential Cdc28p substrate	67	NVNKTSSPPMFAR	9.34047	-2	0	510246	4127	5985	eb04472_JV297_phos	eb04472.raw	U	K.TSS#PPM*FAR.K	0	0	1	1	37.4871	33.0959	24.1928	35.8641	41.007	32.8318	41.3034	39.2079	32.66	38.5875	0.181529	0.102295	1.18149	0.147083
2033	YDR169C	STB3	Ribosomal RNA processing element (RRPE)-binding protein involved in the glucose-induced transition from quiescence to growth; restricted to nucleus in quiescent cells, released into cytoplasm after glucose repletion; binds Sin3p	382	ATSVSTSPKLEEQ	9.34047	-5	0	510246	3308	4957	eb04472_JV297_phos	eb04472.raw	U	K.ATSVSTS#PK.L	0	0	3	3	232.547	199.891	208.856	194.351	249.447	251.052	239.496	247.095	208.911	246.772	0.0806687	0.0207315	1.18123	0.0050957
906	YEL032W	MCM3	Protein involved in DNA replication; component of the Mcm2-7 hexameric complex that binds chromatin as a part of the pre-replicative complex	824	DDNDIMSPLPADE	1000	0	0	510246	17677	22964	eb04472_JV297_phos	eb04472.raw	U	R.FQDDEQNAGEDDNDIM*S#PLPADEEAELQR.R	0	0	4	4	82.0726	81.509	64.4587	73.3227	103.162	87.569	71.9439	93.0567	75.3407	88.933	0.109949	0.146605	1.18041	0.128919
2833	YHR056C	RSC30	Component of the RSC chromatin remodeling complex; non-essential gene required for regulation of ribosomal protein genes and the cell wall/stress response; highly similar to Rsc3p; null mutants are osmosensitive	152	TIVRSDSPDVPSM	30.8348	0	0	510247	9746	13530	eb04473_JV297_phos	eb04473.raw	U	R.SDS#PDVPSMDQIR.E	0	0	3	3	75.7989	76.3331	74.9208	73.6756	81.7932	90.6586	81.4936	101.012	75.1821	88.7393	0.0154412	0.103905	1.18033	0.0267129
408	YBL051C	PIN4	Protein involved in G2/M phase progression and response to DNA damage, interacts with Rad53p; contains an RNA recognition motif, a nuclear localization signal, and several SQ/TQ cluster domains; hyperphosphorylated in response to DNA damage	638	LIYKSLSHSGLDD	4.54047	-2	2	510246	13954	18328	eb04472_JV297_phos	eb04472.raw	U	K.SLS#HSGLDDGLEQGLNR.S	0	0	1	1	97.6793	104.779	92.1701	91.5031	110.913	117.417	94.5439	132.869	96.5329	113.936	0.0637596	0.139308	1.18028	0.0868961
253	YGR270W	YTA7	Protein that localizes to chromatin and has a role in regulation of histone gene expression; has a bromodomain-like region that interacts with the N-terminal tail of histone H3, and an ATPase domain; potentially phosphorylated by Cdc28p	241	DDENDNSRNEALT	23.5235	0	0	510247	14283	19299	eb04473_JV297_phos	eb04473.raw	U	R.TSNEENDDENDNS#RNEALTLADEIR.E	0	0	2	1	29.7436	29.6664	35.9978	24.8722	39.2175	36.8495	31.3332	34.5532	30.07	35.4884	0.1517	0.0947212	1.18019	0.104351
956	YGR214W	RPS0A	Protein component of the small (40S) ribosomal subunit, nearly identical to Rps0Bp; required for maturation of 18S rRNA along with Rps0Bp; deletion of either RPS0 gene reduces growth rate, deletion of both genes is lethal	219	QVAEEATTEEAGE	6.59058	0	1	510247	17036	22837	eb04473_JV297_phos	eb04473.raw	U	R.DPEEVEQQVAEEAT#TEEAGEEEAK.E	0	0	5	4	89.2665	97.7729	86.1323	91.49	112.04	112.538	102.114	103.454	91.1654	107.537	0.0539985	0.0513166	1.17958	0.0044346
2924	YHR052W	CIC1	Essential protein that interacts with proteasome components and has a potential role in proteasome substrate specificity; also copurifies with 66S pre-ribosomal particles	368	EKESSESEAVKKA	20.1669	0	0	510246	2323	3694	eb04472_JV297_phos	eb04472.raw	U	K.ESSES#EAVK.K	0	0	4	3	225.042	223.697	201.59	210.806	267.481	267.932	242.353	237.967	215.284	253.933	0.0518358	0.063029	1.17953	0.0074372
3983	YIR025W	MND2	Subunit of the anaphase-promoting complex (APC); necessary for maintaining sister chromatid cohesion in prophase I of meiosis by inhibiting premature ubiquitination and subsequent degradation of substrates by the APC(Ama1) ubiquitin ligase	293	NPYDIDSDNDGED	27.1205	0	0	510247	6800	9778	eb04473_JV297_phos	eb04473.raw	U	R.NPYDIDS#DNDGEDSK.V	0	0	1	1	18.9886	30.0977	21.3821	21.8008	33.4307	29.477	24.8266	21.097	23.0673	27.2078	0.210164	0.197797	1.1795	0.296475
414	YGR116W	SPT6	Transcription elongation factor required for the maintenance of chromatin structure during transcription in order to inhibit transcription from promoters within the coding region	155	KLEDFFSEDEEEE	52.255	0	0	510246	23785	30385	eb04472_JV297_phos	eb04472.raw	U	K.LEDFFS#EDEEEEESGLR.N	0	0	6	4	118.819	139.274	115.676	124.845	153.279	134.814	146.968	152.939	124.653	147	0.0839394	0.0586753	1.17927	0.0164912
294	YDR093W	DNF2	Aminophospholipid translocase (flippase) that localizes primarily to the plasma membrane; contributes to endocytosis, protein transport and cell polarity; type 4 P-type ATPase	1542	ERRDQLSPVTTTN	33.6572	0	0	510247	11202	15364	eb04473_JV297_phos	eb04473.raw	U	R.DQLS#PVTTTNNLPR.R	0	0	2	2	78.5115	76.4068	74.5356	76.3941	91.0311	73.9378	92.4781	102.741	76.462	90.0469	0.0212487	0.132571	1.17767	0.0649753
2329	YLR114C	AVL9	Conserved protein involved in exocytic transport from the Golgi; mutation is synthetically lethal with apl2 vps1 double mutation; member of a protein superfamily with orthologs in diverse organisms	560	NEDVTESTEDLKN	4.08456	-8	1	510246	7334	10023	eb04472_JV297_phos	eb04472.raw	U	K.NTANEDVTES#TEDLK.N	0	0	1	1	18.881	20.009	22.8812	13.0961	21.6481	22.7807	20.7445	22.9952	18.7168	22.0421	0.21949	0.047531	1.17766	0.167778
1905	YHR195W	NVJ1	Nuclear envelope protein, anchored to the nuclear inner membrane, that interacts with the vacuolar membrane protein Vac8p to promote formation of nucleus-vacuole junctions during piecemeal microautophagy of the nucleus (PMN)	250	SKCRKESTAEPDS	6.59058	0	8	510246	2895	4427	eb04472_JV297_phos	eb04472.raw	U	R.KES#TAEPDSLSR.D	0	0	1	1	56.7506	50.6854	50.1866	45.6404	57.9257	58.0125	56.2093	67.1841	50.8157	59.8329	0.0897631	0.0830757	1.17745	0.0368696
3640	YDR172W	SUP35	Translation termination factor eRF3, has a role in mRNA deadenylation and decay; altered protein conformation creates the [PSI(+)] prion that alters translational fidelity and results in a nonsense suppressor phenotype	150	LKLVSSSGIKLAN	17.0091	0	0	510246	14440	18929	eb04472_JV297_phos	eb04472.raw	U	K.LVSSS#GIK.L	0	0	3	3	220.932	204.898	200.351	181.856	247.425	261.593	207.259	234.788	202.009	237.766	0.0795801	0.0971459	1.17701	0.0440081
1653	YGR186W	TFG1	TFIIF (Transcription Factor II) largest subunit; involved in both transcription initiation and elongation of RNA polymerase II; homologous to human RAP74	200	VKDGSQTPTVDSV	11.0148	-2	7	510246	6817	9352	eb04472_JV297_phos	eb04472.raw	U	K.DGSQT#PTVDSVTK.D	1	0	3	2	145.121	115.141	131.52	133.223	166.852	164.888	140.536	145.539	131.251	154.454	0.0939176	0.0865222	1.17678	0.0433482
540	YCL014W	BUD3	Protein involved in bud-site selection and required for axial budding pattern; localizes with septins to bud neck in mitosis and may constitute an axial landmark for next round of budding	1183	KLGDDYSDKETAK	17.0091	0	0	510247	6177	8950	eb04473_JV297_phos	eb04473.raw	U	K.LGDDYS#DK.E	0	0	3	3	404.376	407.65	402.596	424.187	502.356	467.282	468.749	489.778	409.702	482.041	0.0241165	0.0352678	1.17656	0.00032273
2995	YNL230C	ELA1	Elongin A; F-box protein that forms a heterodimer with Elc1p and is required for ubiquitin-dependent degradation of the RNA Polymerase II subunit Rpo21p; subunit of the Elongin-Cullin-Socs (ECS) ligase complex	278	KKRRSESPSIFLN	20.1669	0	0	510246	14270	18720	eb04472_JV297_phos	eb04472.raw	U	R.SES#PSIFLNR.K	0	0	1	1	18.9527	23.6174	22.8395	25.5257	29.6775	24.4249	24.0225	28.8105	22.7338	26.7339	0.121486	0.109396	1.17595	0.0938735
847	YMR054W	STV1	Subunit a of the vacuolar-ATPase V0 domain, one of two isoforms (Stv1p and Vph1p); Stv1p is located in V-ATPase complexes of the Golgi and endosomes while Vph1p is located in V-ATPase complexes of the vacuole	223	DLTRNQSVEDLSF	60.3582	0	0	510246	20234	26198	eb04472_JV297_phos	eb04472.raw	U	R.NQS#VEDLSFLEQGYQHR.Y	0	0	1	1	26.7561	21.1557	19.7582	25.6172	42.5176	18.1795	27.0161	21.9796	23.3218	27.4232	0.145311	0.389962	1.17586	0.492208
1830	YBL034C	STU1	Component of the mitotic spindle that binds to interpolar microtubules via its association with beta-tubulin (Tub2p); required for interpolar microtubules to provide an outward force on the spindle poles	1018	SEGDEESDDAVDE	38.1333	0	0	510246	4427	6363	eb04472_JV297_phos	eb04472.raw	U	K.SEGDEES#DDAVDENDVK.K	0	0	2	2	41.3829	50.2751	39.7454	42.4122	51.616	55.0025	44.5444	53.196	43.4539	51.0897	0.107659	0.0896003	1.17572	0.0583804
3314	YML069W	POB3	Subunit of the heterodimeric FACT complex (Spt16p-Pob3p), which associates with chromatin via interaction with Nhp6Ap and Nhp6Bp, and reorganizes nucleosomes to facilitate access to DNA by RNA and DNA polymerases	195	TKKEESSNEVVPK	6.59058	-1	0	510246	7119	9742	eb04472_JV297_phos	eb04472.raw	U	K.KEESS#NEVVPK.K	0	0	2	2	87.4621	87.821	93.3048	88.7976	122.068	109.952	84.3263	103.817	89.3464	105.041	0.0302044	0.149987	1.17566	0.0971898
1998	YPL015C	HST2	Cytoplasmic member of the silencing information regulator 2 (Sir2) family of NAD(+)-dependent protein deacetylases; modulates nucleolar (rDNA) and telomeric silencing; possesses NAD(+)-dependent histone deacetylase activity in vitro	340	RLNGHDSDEDGAS	7.64917	0	11	510246	1656	2852	eb04472_JV297_phos	eb04472.raw	U	R.LNGHDS#DEDGASNSSSSQK.A	0	0	1	1	7.06245	9.02616	11.857	10.6782	16.8722	6.55044	9.84652	12.1263	9.65595	11.3489	0.215687	0.382035	1.17532	0.507863
83	YDR122W	KIN1	Serine/threonine protein kinase involved in regulation of exocytosis; localizes to the cytoplasmic face of the plasma membrane; closely related to Kin2p	764	AQKFEGSDDDENH	1000	0	0	510246	21383	27557	eb04472_JV297_phos	eb04472.raw	U	K.FEGS#DDDENHPLPPLNVAK.G	0	0	4	3	221.135	216.859	210.626	220.478	269.782	279.043	220.26	251.762	217.274	255.212	0.0221596	0.101517	1.17461	0.0280838
3835	YKL179C	COY1	Golgi membrane protein with similarity to mammalian CASP; genetic interactions with GOS1 (encoding a Golgi snare protein) suggest a role in Golgi function	364	GVNEDDSDNDIRS	1000	0	0	510247	16254	21829	eb04473_JV297_phos	eb04473.raw	U	K.KIEFGVNEDDS#DNDIR.S	0	0	2	2	113.621	130.743	111.814	108.193	146.029	137.546	123.255	138.503	116.093	136.333	0.0863441	0.0697436	1.17435	0.0262885
230	YPR112C	MRD1	Essential conserved protein that is part of the 90S preribosome; required for production of 18S rRNA and small ribosomal subunit; contains five consensus RNA-binding domains	264	VNDDANSDEKENE	86.3444	0	0	510247	12795	17390	eb04473_JV297_phos	eb04473.raw	U	K.DTDIGLVNDDANS#DEK.E	0	0	2	2	127.244	103.706	109.388	105.279	151.025	128.781	122.228	121.19	111.404	130.806	0.0971947	0.106203	1.17416	0.0698048
1152	YIL117C	PRM5	Pheromone-regulated protein, predicted to have 1 transmembrane segment; induced during cell integrity signaling	276	SRKLLNSPESDGS	15.0073	0	0	510246	7716	10507	eb04472_JV297_phos	eb04472.raw	U	K.LLNS#PESDGSVNR.N	0	0	1	1	67.0395	53.5363	53.7364	52.6852	68.5231	71.0603	57.1865	69.7109	56.7493	66.6202	0.121151	0.0956765	1.17394	0.0798439
2485	YDR379W	RGA2	GTPase-activating protein for the polarity-establishment protein Cdc42p; implicated in control of septin organization, pheromone response, and haploid invasive growth; regulated by Pho85p and Cdc28p	707	GSISNASPKPRFW	24.2431	0	0	510246	2822	4338	eb04472_JV297_phos	eb04472.raw	U	K.GSISNAS#PK.P	0	0	4	4	215.184	214.408	192.106	210.597	297.089	245.429	202.485	231.874	208.074	244.219	0.0520592	0.161914	1.17371	0.128322
1017	YIL135C	VHS2	Cytoplasmic protein of unknown function; identified as a high-copy suppressor of the synthetic lethality of a sis2 sit4 double mutant, suggesting a role in G1/S phase progression; similar to Mlf3p	53	YLYKTVSNNAANS	17.0091	0	0	510246	2566	4007	eb04472_JV297_phos	eb04472.raw	U	K.TVS#NNAANSLSR.Q	0	0	4	4	188.679	191.527	145.324	144.319	197.97	180.124	193.788	214.307	167.462	196.547	0.156288	0.0716394	1.17368	0.0980594
25	YAR042W	SWH1	Protein similar to mammalian oxysterol-binding protein; contains ankyrin repeats; localizes to the Golgi and the nucleus-vacuole junction	712	KESDEDSDADEFF	35.7774	0	0	510246	20843	26924	eb04472_JV297_phos	eb04472.raw	U	K.ESDEDS#DADEFFDAEEAASDK.K	0	0	2	2	76.48	71.4203	76.6592	70.2643	93.2621	78.3401	85.8849	88.4142	73.706	86.4753	0.0453284	0.0720164	1.17325	0.0111814
1751	YDL122W	UBP1	Ubiquitin-specific protease that removes ubiquitin from ubiquitinated proteins; cleaves at the C terminus of ubiquitin fusions irrespective of their size; capable of cleaving polyubiquitin chains	618	KRIIEHSDVENEN	1000	0	0	510246	8874	11970	eb04472_JV297_phos	eb04472.raw	U	R.IIEHS#DVENENVK.D	0	0	2	2	88.6332	106.157	103.371	99.2797	133.444	109.859	102.151	120.755	99.3604	116.552	0.0773858	0.116717	1.17303	0.070064
2856	YMR005W	TAF4	TFIID subunit (48 kDa), involved in RNA polymerase II transcription initiation; potential Cdc28p substrate	80	VLPKNVSPTTNLR	6.59058	0	3	510246	3756	5514	eb04472_JV297_phos	eb04472.raw	U	K.NVS#PTTNLR.V	0	0	2	2	97.6315	77.1432	100.217	102.22	117.548	105.032	113.965	105.812	94.303	110.589	0.122935	0.0556242	1.1727	0.0476837
1965	YKL042W	SPC42	Central plaque component of spindle pole body (SPB); involved in SPB duplication, may facilitate attachment of the SPB to the nuclear membrane	326	QSSRDYSPSSDAC	5.08456	-1	14	510247	15879	21346	eb04473_JV297_phos	eb04473.raw	U	R.DYS#PSSDACLECSNDLYEK.N	0	0	1	1	18.4389	16.4217	22.038	18.6901	17.0001	18.3651	39.9798	13.2869	18.8972	22.158	0.123143	0.544881	1.17256	0.614881
2813	YNL118C	DCP2	Catalytic subunit of the Dcp1p-Dcp2p decapping enzyme complex, which removes the 5' cap structure from mRNAs prior to their degradation; member of the Nudix hydrolase family	598	WGPGKSSPSTQSK	9.34047	-1	5	510247	756	1785	eb04473_JV297_phos	eb04473.raw	U	K.SS#PSTQSK.Q	0	0	1	1	10.6475	12.6661	17.6762	14.3639	17.4532	16.217	16.2789	14.9432	13.8384	16.2231	0.215019	0.0632072	1.17232	0.18045
113	YIL031W	ULP2	Peptidase that deconjugates Smt3/SUMO-1 peptides from proteins, plays a role in chromosome cohesion at centromeric regions and recovery from checkpoint arrest induced by DNA damage or DNA replication defects; potential Cdc28p substrate	844	QFEGVSSPIKNDQ	6.59058	-1	0	510247	13365	18116	eb04473_JV297_phos	eb04473.raw	U	K.QFEGVSS#PIK.N	0	0	2	2	194.259	211.62	186.558	169.596	252.933	218.697	217.823	203.849	190.508	223.326	0.0915568	0.0934837	1.17226	0.052387
1179	YGR202C	PCT1	Cholinephosphate cytidylyltransferase, also known as CTP:phosphocholine cytidylyltransferase, rate-determining enzyme of the CDP-choline pathway for phosphatidylcholine synthesis, inhibited by Sec14p, activated upon lipid-binding	346	KLIREASPATEFA	26.9265	0	0	510246	21412	27591	eb04472_JV297_phos	eb04472.raw	U	R.EAS#PATEFANEFTGENSTAK.S	0	0	1	1	32.9939	33.4326	32.042	37.2495	48.5019	38.812	35.9843	35.7864	33.9295	39.7712	0.0674393	0.150418	1.17217	0.117948
2638	YER151C	UBP3	Ubiquitin-specific protease that interacts with Bre5p to co-regulate anterograde and retrograde transport between the ER and Golgi; inhibitor of gene silencing; cleaves ubiquitin fusions but not polyubiquitin; also has mRNA binding activity	515	DACLTMYKQFDKE	11.0148	-2	0	510246	21208	27355	eb04472_JV297_phos	eb04472.raw	U	K.LLDACLTMY#K.Q	0	0	1	1	225.293	227.4	235.058	256.603	291.441	264.617	260.438	290.293	236.089	276.697	0.0605936	0.0594779	1.17201	0.00979938
3343	YGR180C	RNR4	Ribonucleotide-diphosphate reductase (RNR), small subunit; the RNR complex catalyzes the rate-limiting step in dNTP synthesis and is regulated by DNA replication and DNA damage checkpoint pathways via localization of the small subunits	334	DMSKSATPSKEIN	0	-2	2	510246	21604	27813	eb04472_JV297_phos	eb04472.raw	U	K.SAT#PSKEINFDDDF.-	0	0	1	1	47.1189	62.6045	66.624	53.3909	84.6866	60.3463	54.8857	69.2757	57.4346	67.2986	0.153751	0.193486	1.17174	0.256518
3653	YDR005C	MAF1	Negative regulator of RNA polymerase III; component of several signaling pathways that repress polymerase III transcription in response to changes in cellular environment; targets the initiation factor TFIIIB	183	SSSSISSFKSGKS	17.0091	0	0	510247	8671	12150	eb04473_JV297_phos	eb04473.raw	U	R.SSSSISS#FK.S	0	0	3	3	151.084	134.519	149.311	153.755	153.721	192.721	162.443	180.286	147.167	172.293	0.058625	0.101813	1.17073	0.0423033
903	YPL120W	VPS30	Subunit of phosphatidylinositol (PtdIns) 3-kinase complexes I and II; Complex I is essential in autophagy and Complex II is required for vacuolar protein sorting; ortholog of the higher eukaryotic gene Beclin 1	142	EEEQEATDEDENQ	27.1489	0	0	510246	5867	8155	eb04472_JV297_phos	eb04472.raw	U	R.DHDEEEQEAT#DEDENQQIQLNSK.T	0	0	1	1	13.0016	10.6462	11.1803	16.4159	15.7916	10.913	18.6169	14.6289	12.811	14.9876	0.203435	0.212915	1.1699	0.33139
1117	YPR104C	FHL1	Regulator of ribosomal protein transcription; has forkhead associated domain that binds phosphorylated proteins; also has forkhead DNA-binding domain but does not bind DNA in vitro; suppresses RNA pol III and splicing factor prp4 mutants	393	RNDDSKSPENADI	80.7549	0	0	510246	7481	10211	eb04472_JV297_phos	eb04472.raw	U	K.S#PENADIAESEINTR.N	0	0	5	5	191.188	172.339	159.991	162.159	172.243	195.161	201.495	232.829	171.419	200.432	0.0830479	0.124667	1.16925	0.0901874
3888	YMR221C	YMR221C	Putative protein of unknown function; the authentic, non-tagged protein is detected in highly purified mitochondria in high-throughput studies; physical interaction with Atg27p suggests a possible role in autophagy	269	RPQRRKSVLETYV	18.8054	0	0	510247	20218	26857	eb04473_JV297_phos	eb04473.raw	U	K.S#VLETYVEDK.L	0	0	1	1	68.5691	59.9324	50.1346	66.1603	86.6968	70.7686	47.241	81.4624	61.1991	71.5422	0.1344	0.244673	1.16901	0.32594
1895	YKR008W	RSC4	Component of the RSC chromatin remodeling complex; found in close proximity to nucleosomal DNA; displaced from the surface of nucleosomal DNA after chromatin remodeling; acetylated (K25) by Gcn5p, altering replication stress tolerance; contains tandem bromodomains that recognize histone H3 acetylated on K14 (H3K14ac) by Gcn5p	199	ALLGASSPKNLDD	0	-1	0	510246	19987	25889	eb04472_JV297_phos	eb04472.raw	U	K.INQALLGASS#PK.N	0	0	1	1	44.7408	52.5684	48.1046	50.032	60.8191	58.7948	55.5537	53.2685	48.8615	57.109	0.0675321	0.0587532	1.1688	0.0127466
916	YLL021W	SPA2	Component of the polarisome, which functions in actin cytoskeletal organization during polarized growth; acts as a scaffold for Mkk1p and Mpk1p cell wall integrity signaling components; potential Cdc28p substrate	254	YWDVNDSPIIKVD	26.1051	0	0	510246	21864	28116	eb04472_JV297_phos	eb04472.raw	U	K.NYWDVNDS#PIIK.V	0	0	1	1	100.667	95.9108	100.915	99.6849	118.373	116.118	109.487	120.235	99.2943	116.053	0.0233375	0.040413	1.16878	0.000681586
3544	YBL099W	ATP1	Alpha subunit of the F1 sector of mitochondrial F1F0 ATP synthase, which is a large, evolutionarily conserved enzyme complex required for ATP synthesis; phosphorylated	178	GILPRRSVHEPVQ	16.1979	0	0	510246	5178	7295	eb04472_JV297_phos	eb04472.raw	U	R.RS#VHEPVQTGLK.A	0	0	1	1	41.2753	38.8819	39.4539	34.8577	54.0214	43.4132	43.2455	39.7157	38.6172	45.0989	0.070076	0.137205	1.16785	0.103341
894	YDR099W	BMH2	14-3-3 protein, minor isoform; controls proteome at post-transcriptional level, binds proteins and DNA, involved in regulation of many processes including exocytosis, vesicle transport, Ras/MAPK signaling, and rapamycin-sensitive signaling	212	AELDTLSEESYKD	4.08456	-2	4	510246	23359	29874	eb04472_JV297_phos	eb04472.raw	R	K.QAFDDAIAELDTLS#EESYK.D	0	0	1	1	20.5062	25.6478	21.3093	21.9837	32.9078	21.2823	23.0948	27.1179	22.3617	26.1007	0.10162	0.197383	1.1672	0.232445
3007	YNL098C	RAS2	GTP-binding protein that regulates the nitrogen starvation response, sporulation, and filamentous growth; farnesylation and palmitoylation required for activity and localization to plasma membrane; homolog of mammalian Ras proto-oncogenes	235	VNARNASIESKTG	1000	0	0	510246	3428	5106	eb04472_JV297_phos	eb04472.raw	U	R.NAS#IES#K.T	1	1	4	2	197.665	129.901	200.923	213.172	235.572	225.128	218.182	186.694	185.415	216.394	0.202825	0.0972794	1.16708	0.200581
734	YCR091W	KIN82	Putative serine/threonine protein kinase implicated in the regulation of phospholipid asymmetry through the activation of phospholipid translocases (flippases) Lem3p-Dnf1p/Dnf2p; similar to Fpk1p	269	RLRRAASEPFNTA	30.6121	0	0	510247	8289	11663	eb04473_JV297_phos	eb04473.raw	U	R.AAS#EPFNTAK.D	0	0	1	1	77.7109	84.8122	89.1616	84.6675	101.373	103.441	100.395	87.3261	84.0881	98.1338	0.056314	0.0745534	1.16704	0.0180605
3358	YHR012W	VPS29	Endosomal protein that is a subunit of the membrane-associated retromer complex essential for endosome-to-Golgi retrograde transport; forms a subcomplex with Vps35p and Vps26p that selects cargo proteins for endosome-to-Golgi retrieval	207	EQPGSYTPKEGTA	11.0148	-2	0	510246	3158	4763	eb04472_JV297_phos	eb04472.raw	U	K.EQPGSYT#PK.E	0	0	1	1	62.0324	67.4858	66.9467	50.1104	77.6797	66.8702	69.705	73.3742	61.6438	71.9073	0.130929	0.065078	1.1665	0.0700809
3493	YNL095C	YNL095C	Putative protein of unknown function predicted to contain a transmembrane domain; YNL095C is not an essential gene	223	TARDSLTEAIGTK	11.0148	-2	5	510246	15817	20638	eb04472_JV297_phos	eb04472.raw	U	R.DSLT#EAIGTK.G	0	0	2	2	156.258	164.922	162.146	163.859	217.131	183.306	163.606	190.889	161.796	188.733	0.0238885	0.117365	1.16649	0.0535899
2146	YER155C	BEM2	Rho GTPase activating protein (RhoGAP) involved in the control of cytoskeleton organization and cellular morphogenesis; required for bud emergence	1016	GKSRPASMVIETP	22.4917	0	0	510247	13578	18390	eb04473_JV297_phos	eb04473.raw	U	K.S#RPAS#MVIETPK.R	1	1	2	1	66.1552	58.9225	69.6221	61.8734	77.8424	68.2227	63.9034	89.2605	64.1433	74.8072	0.0733861	0.150519	1.16625	0.131129
937	YNL271C	BNI1	Formin, nucleates the formation of linear actin filaments, involved in cell processes such as budding and mitotic spindle orientation which require the formation of polarized actin cables, functionally redundant with BNR1	311	SLKKQPSLNNIYR	31.9355	0	0	510247	8882	12417	eb04473_JV297_phos	eb04473.raw	U	K.KQPS#LNNIYR.G	0	0	1	1	115.126	111.47	105.901	83.5565	135.826	124.326	101.57	123.427	104.013	121.287	0.136094	0.117949	1.16607	0.136864
3564	YNR053C	NOG2	Putative GTPase that associates with pre-60S ribosomal subunits in the nucleolus and is required for their nuclear export and maturation	60	NLIRAASFQDSTI	31.2747	0	0	510247	8075	11386	eb04473_JV297_phos	eb04473.raw	U	R.AAS#FQDSTIPDAR.V	0	0	3	3	163.297	161.04	135.413	136.856	203.571	162.289	176.446	153.096	149.152	173.85	0.101041	0.126653	1.1656	0.11358
3842	YKL186C	MTR2	mRNA transport regulator, essential nuclear protein; Mex67p and Mtr2p form a mRNA export complex which binds to RNA	125	PIQPNNTGNRNRP	13.9355	0	0	510247	8406	11814	eb04473_JV297_phos	eb04473.raw	U	K.MGQDATVPIQPNNT#GNR.N	0	0	1	1	33.0418	37.5564	31.1988	31.0282	38.6597	40.3502	33.7825	42.0007	33.2063	38.6983	0.091549	0.0917277	1.16539	0.0570392
3056	YMR069W	NAT4	N alpha-acetyl-transferase, involved in acetylation of the N-terminal residues of histones H4 and H2A	256	GSPAPASPTIRHT	6.59058	-5	2	510246	4954	7017	eb04472_JV297_phos	eb04472.raw	U	R.APGSPAPAS#PTIR.H	0	0	2	2	66.5615	70.7154	55.2563	68.6436	84.4309	78.4196	67.8742	73.5677	65.2942	76.0731	0.105729	0.0925967	1.16508	0.0714941
3336	YMR153W	NUP53	Subunit of the nuclear pore complex (NPC), interacts with karyopherin Kap121p or with Nup170p via overlapping regions of Nup53p, involved in activation of the spindle checkpoint mediated by the Mad1p-Mad2p complex	101	SNGQSLSPVRSDS	17.0091	0	0	510247	1747	3127	eb04473_JV297_phos	eb04473.raw	U	R.SNGQSLS#PVR.S	0	0	2	2	99.5316	97.6572	95.6679	102.207	117.885	103.574	114.769	124.019	98.766	115.062	0.0281909	0.0744698	1.16499	0.0111319
2469	YNL186W	UBP10	Ubiquitin-specific protease that deubiquitinates ubiquitin-protein moieties; may regulate silencing by acting on Sir4p; involved in posttranscriptionally regulating Gap1p and possibly other transporters; primarily located in the nucleus	258	EEEENDSSSKISE	6.59058	0	2	510247	5177	7628	eb04473_JV297_phos	eb04473.raw	U	K.ELPEEEENDS#SSK.I	1	1	2	1	32.8864	38.2823	36.1331	31.9823	44.6557	40.4828	41.6003	35.5083	34.821	40.5618	0.0837325	0.0937513	1.16486	0.0535821
2620	YBR156C	SLI15	Subunit of the conserved chromosomal passenger complex (CPC; Ipl1p-Sli15p-Bir1p-Nbl1p), which regulates kinetochore-microtubule attachments, activation of the spindle tension checkpoint, and mitotic spindle disassembly	618	EIIGNVTPKIASV	1000	0	0	510247	13802	18675	eb04473_JV297_phos	eb04473.raw	U	R.EIIGNVT#PK.I	0	0	1	1	43.032	42.8795	43.087	29.6166	47.5258	50.4145	44.2351	42.5205	39.6538	46.174	0.168761	0.0759717	1.16443	0.135116
3212	YCL012C	YCL012C	Putative protein of unknown function; orthologs are present in S. bayanus, S. paradoxus and Ashbya gossypii; YCL012C is not an essential gene	74	DIISENSNDVRGG	1000	0	0	510246	18860	24433	eb04472_JV297_phos	eb04472.raw	U	R.NFDIIS#ENS#NDVR.G	1	0	2	1	43.7729	35.8311	35.0817	43.9544	45.7131	42.6839	46.8205	49.3393	39.66	46.1392	0.122645	0.0597827	1.16337	0.0596615
3894	YJR110W	YMR1	Phosphatidylinositol 3-phosphate (PI3P) phosphatase; involved in various protein sorting pathways, including CVT targeting and endosome to vacuole transport; has similarity to the conserved myotubularin dual specificity phosphatase family	654	LRHKRDSVPISVD	47.0452	0	0	510247	9397	13078	eb04473_JV297_phos	eb04473.raw	U	K.RDS#VPISVDK.K	0	0	2	2	219.916	214.334	230.29	252.525	299.482	245.071	272.969	249.175	229.266	266.674	0.0735237	0.0940942	1.16316	0.0481312
2755	YML109W	ZDS2	Protein with a role in regulating Swe1p-dependent polarized growth; interacts with Cdc55p; interacts with silencing proteins at the telomere; implicated in the mitotic exit network through regulation of Cdc14p localization; paralog of Zds1p	454	DHYRRTSTDWSTE	0	-1	5	510246	3446	5127	eb04472_JV297_phos	eb04472.raw	U	R.RTS#TDWSTENEK.Y	0	0	1	1	68.9395	50.0962	46.7305	47.4702	52.8594	74.4549	60.8975	59.7246	53.3091	61.9841	0.197337	0.145815	1.16273	0.257517
801	YJL123C	MTC1	Protein of unknown function that may interact with ribosomes; green fluorescent protein (GFP)-fusion protein localizes to the cytoplasm and to COPI-coated vesicles (early Golgi); mtc1 is synthetically lethal with cdc13-1	436	QKKQKESEDEDED	98.0402	0	0	510246	22450	28803	eb04472_JV297_phos	eb04472.raw	U	K.QKES#EDEDEDDEIIDPSEWVK.E	0	0	2	2	325.064	333.431	331.746	359.948	425.827	362.648	369.912	411.435	337.547	392.455	0.0455184	0.0788188	1.16267	0.0190874
3716	YGR280C	PXR1	Essential protein involved in rRNA and snoRNA maturation; competes with TLC1 RNA for binding to Est2p, suggesting a role in negative regulation of telomerase; human homolog inhibits telomerase; contains a G-patch RNA interacting domain	159	KREGDDSEDEDDD	1000	0	0	510246	2240	3589	eb04472_JV297_phos	eb04472.raw	U	R.EGDDS#EDEDDDDKEDK.D	0	0	1	1	58.7582	22.334	41.1924	40.9744	41.3323	38.3214	59.0668	51.0319	40.8147	47.4381	0.364418	0.19944	1.16228	0.480795
586	YBR081C	SPT7	Subunit of the SAGA transcriptional regulatory complex, involved in proper assembly of the complex; also present as a C-terminally truncated form in the SLIK/SALSA transcriptional regulatory complex	88	EHHGAVSPAVDTR	23.6238	0	0	510246	10746	14327	eb04472_JV297_phos	eb04472.raw	U	K.SFPLTQEEEHHGAVS#PAVDTR.S	1	1	4	3	96.7233	99.9505	89.1408	97.2539	114.12	108.957	101.657	120.247	95.7671	111.245	0.04843	0.0708706	1.16162	0.0147793
3254	YBR108W	AIM3	Protein interacting with Rvs167p; null mutant is viable and displays elevated frequency of mitochondrial genome loss	847	DSSPVPSDLDEKY	15.3812	0	0	510247	10335	14266	eb04473_JV297_phos	eb04473.raw	U	K.DSS#PVPS#DLDEK.Y	1	1	3	1	56.5115	63.0464	62.8764	69.2187	87.4056	64.2845	78.0547	62.5778	62.9133	73.0807	0.0824698	0.161448	1.16161	0.165716
967	YGR167W	CLC1	Clathrin light chain, subunit of the major coat protein involved in intracellular protein transport and endocytosis; thought to regulate clathrin function; two Clathrin heavy chains (CHC1) form the clathrin triskelion structural component	160	IDDFYDSYNKKKE	6.59058	-2	1	510246	12742	16825	eb04472_JV297_phos	eb04472.raw	U	K.HIDDFYDS#YNK.K	0	0	2	2	110.944	114.7	109.357	118.976	160.054	120.56	113.247	133.28	113.494	131.785	0.0377697	0.156188	1.16116	0.132519
1600	YLR196W	PWP1	Protein with WD-40 repeats involved in rRNA processing; associates with trans-acting ribosome biogenesis factors; similar to beta-transducin superfamily	131	LPNQEDSQEEKQE	16.1979	0	0	510247	16375	21986	eb04473_JV297_phos	eb04473.raw	U	K.GEDPYISLPNQEDS#QEEK.Q	0	0	4	3	128.367	122.011	123.129	132.02	164.772	124.564	138.074	159.54	126.382	146.737	0.0369475	0.127848	1.16106	0.0798309
3636	YPR040W	TIP41	Protein that interacts physically and genetically with Tap42p, which regulates protein phosphatase 2A; component of the TOR (target of rapamycin) signaling pathway	6	xMSKRNTPPLRSS	1000	0	0	510246	994	1994	eb04472_JV297_phos	eb04472.raw	U	K.RNT#PPLR.S	0	0	1	1	93.9987	97.4257	91.8891	99.6195	111.308	111.755	113.445	107.541	95.7333	111.012	0.0360611	0.0224369	1.1596	0.000369339
2696	YER132C	PMD1	Protein with an N-terminal kelch-like domain, putative negative regulator of early meiotic gene expression; required, with Mds3p, for growth under alkaline conditions	838	SSIRRASHPLQSY	22.4917	0	0	510247	13203	17910	eb04473_JV297_phos	eb04473.raw	U	R.RAS#HPLQSYIIAK.S	0	0	1	1	61.6501	60.8372	50.2907	52.9335	65.3857	69.5222	53.0302	73.6523	56.4279	65.3976	0.100556	0.136227	1.15896	0.140344
2134	YPR072W	NOT5	Subunit of the CCR4-NOT complex, which is a global transcriptional regulator with roles in transcription initiation and elongation and in mRNA degradation	318	SMKKKESENDSEQ	11.7212	0	4	510247	9544	13269	eb04473_JV297_phos	eb04473.raw	U	K.KES#ENDSEQQLNFPPDR.T	0	0	2	2	46.3541	52.6105	50.5926	44.8824	56.3686	57.734	53.8219	57.3791	48.6099	56.3259	0.0740965	0.0313665	1.15873	0.00849276
638	YMR291W	TDA1	Putative kinase of unknown function; green fluorescent protein (GFP)-fusion protein localizes to the cytoplasm and nucleus; null mutant is sensitive to expression of the top1-T722A allele; not an essential gene	523	LSRQGSSTSVKKY	24.437	0	0	510246	1586	2760	eb04472_JV297_phos	eb04472.raw	U	R.QGSS#TSVK.K	0	0	2	1	74.3649	72.5564	64.4691	84.9027	87.8588	81.7214	84.7469	88.9945	74.0733	85.8304	0.113461	0.0381609	1.15872	0.0402892
731	YJL146W	IDS2	Protein involved in modulation of Ime2p activity during meiosis, appears to act indirectly to promote Ime2p-mediated late meiotic functions; found in growing cells and degraded during sporulation	170	SFSGASSNEPTNS	11.7212	-7	14	510247	14119	19089	eb04473_JV297_phos	eb04473.raw	U	R.SSFSGASS#NEPTNSPGDFLNQSR.A	0	0	2	2	32.4323	31.5495	26.7121	29.2637	39.2059	32.3279	38.347	29.1127	29.9894	34.7484	0.0853817	0.139448	1.15869	0.133118
2835	YER047C	SAP1	Putative ATPase of the AAA family, interacts with the Sin1p transcriptional repressor in the two-hybrid system	548	VGTEDATEHATSL	6.03896	-4	5	510246	9300	12506	eb04472_JV297_phos	eb04472.raw	U	K.IEDVGTEDAT#EHATSLNEQR.E	0	0	1	1	13.8142	10.8566	14.3866	13.5928	17.4184	14.3871	13.038	16.1522	13.1626	15.2489	0.119524	0.126446	1.15851	0.144604
2605	YFR014C	CMK1	Calmodulin-dependent protein kinase; may play a role in stress response, many CA++/calmodulan dependent phosphorylation substrates demonstrated in vitro, amino acid sequence similar to Cmk2p and mammalian Cam Kinase II	362	GSQANGSVPPLKA	12.4311	-19	0	510247	20861	27618	eb04473_JV297_phos	eb04473.raw	U	R.DLYLEQTESDSDFDEGSQANGS#VPPLK.A	0	0	2	2	80.4235	93.1546	94.6581	93.6204	126.275	98.9726	101.508	92.2346	90.4642	104.748	0.074319	0.142011	1.15789	0.130697
3240	YIL130W	ASG1	Zinc cluster protein proposed to function as a transcriptional regulator involved in the stress response; null mutants have a respiratory deficiency, calcofluor white sensitivity and slightly increased cycloheximide resistance	200	SNSKNSTPDEFLP	0	-1	0	510247	14624	19738	eb04473_JV297_phos	eb04473.raw	U	K.NST#PDEFLPNM*K.S	0	0	1	1	63.2633	66.7494	57.5257	60.5925	82.4439	68.0238	66.6619	70.0978	62.0327	71.8069	0.0632267	0.100697	1.15756	0.0550364
1723	YGR196C	FYV8	Protein of unknown function, required for survival upon exposure to K1 killer toxin	92	KSDISPSDKEVGY	6.59058	-5	0	510246	4033	5869	eb04472_JV297_phos	eb04472.raw	U	K.SDISPS#DK.E	0	0	1	1	106.725	97.7729	97.0628	84.5498	122.73	98.9196	103.747	121.505	96.5277	111.725	0.0944384	0.108935	1.15744	0.0925693
1504	YCR057C	PWP2	Conserved 90S pre-ribosomal component essential for proper endonucleolytic cleavage of the 35 S rRNA precursor at A0, A1, and A2 sites; contains eight WD-repeats; PWP2 deletion leads to defects in cell cycle and bud morphogenesis	232	DDDDNESEDDDKQ	27.1489	0	0	510246	7832	10655	eb04472_JV297_phos	eb04472.raw	U	K.RPSDDDDNES#EDDDKQEEVDISK.Y	0	0	4	3	80.8418	84.8228	86.4238	79.2042	83.571	113.665	91.6246	94.302	82.8231	95.7906	0.0406385	0.133196	1.15657	0.0969606
613	YMR311C	GLC8	Regulatory subunit of protein phosphatase 1 (Glc7p), involved in glycogen metabolism and chromosome segregation; proposed to regulate Glc7p activity via conformational alteration; ortholog of the mammalian protein phosphatase inhibitor 2	118	HIDEPKTPYQGAV	11.0148	0	13	510246	5041	7124	eb04472_JV297_phos	eb04472.raw	U	K.T#PYQGAVDPHGEYYR.V	0	0	2	2	30.9505	36.9568	41.8378	30.4792	58.3324	29.0924	35.7988	38.8935	35.0561	40.5293	0.153975	0.30975	1.15613	0.45365
2774	YFR053C	HXK1	Hexokinase isoenzyme 1, a cytosolic protein that catalyzes phosphorylation of glucose during glucose metabolism; expression is highest during growth on non-glucose carbon sources; glucose-induced repression involves the hexokinase Hxk2p	15	PQARKGSMADVPK	1000	0	0	510246	3479	5167	eb04472_JV297_phos	eb04472.raw	R	K.GS#M*ADVPK.E	0	0	15	15	1896.47	1610.98	1296.43	1314.08	1552.4	1977.49	1632.59	1909.53	1529.49	1768	0.185706	0.117168	1.15594	0.223633
1019	YIL135C	VHS2	Cytoplasmic protein of unknown function; identified as a high-copy suppressor of the synthetic lethality of a sis2 sit4 double mutant, suggesting a role in G1/S phase progression; similar to Mlf3p	177	RSLSSQSFDNETS	11.0148	-5	6	510246	4991	7063	eb04472_JV297_phos	eb04472.raw	U	R.SLSSQS#FDNETSPAHPR.S	1	1	4	2	39.8533	53.7572	49.4475	47.8754	55.4274	50.8919	62.0232	52.2288	47.7333	55.1428	0.121762	0.0900564	1.15523	0.100656
2327	YLR114C	AVL9	Conserved protein involved in exocytic transport from the Golgi; mutation is synthetically lethal with apl2 vps1 double mutation; member of a protein superfamily with orthologs in diverse organisms	524	KSVSQISVNPGKN	15.0073	0	0	510246	11198	14890	eb04472_JV297_phos	eb04472.raw	U	K.SVSQIS#VNPGK.N	1	1	4	1	49.712	55.1669	48.4169	47.7055	70.9982	48.7703	49.6903	62.6625	50.2503	58.0303	0.0672894	0.184777	1.15482	0.215655
184	YML016C	PPZ1	Serine/threonine protein phosphatase Z, isoform of Ppz2p; involved in regulation of potassium transport, which affects osmotic stability, cell cycle progression, and halotolerance	690	ITNDNESQQxxxx	0.905121	-8	0	510247	8568	12020	eb04473_JV297_phos	eb04473.raw	U	K.LANQQQQM*METSITNDNES#QQ.-	0	0	4	2	30.6996	35.5366	28.8461	32.309	41.8785	41.9812	31.4074	31.833	31.8478	36.775	0.0890847	0.161929	1.15471	0.18581
3193	YGL056C	SDS23	One of two S. cerevisiae homologs (Sds23p and Sds24p) of the S. pombe Sds23 protein, which is implicated in APC/cyclosome regulation; involved in cell separation during budding	46	NKSDTESLHKSIS	31.2747	0	0	510246	2420	3817	eb04472_JV297_phos	eb04472.raw	U	K.SDTES#LHK.S	1	1	3	2	136.051	138.853	133.904	127.21	176.589	143.725	154.143	144.197	134.005	154.664	0.0370302	0.0994807	1.15417	0.043153
553	YGR009C	SEC9	t-SNARE protein important for fusion of secretory vesicles with the plasma membrane; similar to but not functionally redundant with Spo20p; SNAP-25 homolog	79	LEDLNASPLDANA	54.066	0	0	510246	20436	26444	eb04472_JV297_phos	eb04472.raw	U	R.PQDELEDLNAS#PLDANANEATAGSNR.G	0	0	2	1	55.3763	50.0647	47.2406	49.6791	67.6168	54.8168	48.6388	62.4811	50.5902	58.3884	0.0677405	0.143198	1.15415	0.135098
683	YMR219W	ESC1	Protein localized to the nuclear periphery, involved in telomeric silencing; interacts with PAD4-domain of Sir4p	532	SDLHEHSPDNLYD	42.8692	0	0	510246	15304	20000	eb04472_JV297_phos	eb04472.raw	U	K.SVESDLHEHS#PDNLYDLAAR.A	1	1	3	2	90.6766	92.0395	86.5487	73.2704	94.7379	97.7129	97.5869	105.183	85.6338	98.8052	0.100036	0.0452232	1.15381	0.0343455
2735	YFL007W	BLM10	Proteasome activator subunit; found in association with core particles, with and without the 19S regulatory particle; required for resistance to bleomycin, may be involved in protecting against oxidative damage; similar to mammalian PA200	35	SPGRPSSSQGEIK	6.59058	-6	1	510246	2432	3833	eb04472_JV297_phos	eb04472.raw	U	R.SPGRPSS#SQGEIK.R	0	0	1	1	71.4371	84.0338	69.1016	59.6384	82.7228	95.3924	75.7539	73.9908	71.0527	81.965	0.141384	0.118504	1.15358	0.169351
284	YDR096W	GIS1	JmjC domain-containing histone demethylase and transcription factor; involved in expression of genes during nutrient limitation; negatively regulates DPP1 and PHR1; activity is modulated by limited proteasome-mediated proteolysis; has a JmjC and a JmjN domain in the N-terminal region that interact, promoting Gis1p stability and proper transcriptional activity; contains transactivating domains TAD…	747	DAGPSFSPLHKKP	4.08456	-13	0	510246	21614	27824	eb04472_JV297_phos	eb04472.raw	U	R.QNSNNINPLDAGPSFS#PLHK.K	0	0	2	2	125.798	119.097	101.945	107.658	128.157	132.852	120.335	142.855	113.624	131.05	0.0950806	0.0718242	1.15336	0.0510048
2129	YDR345C	HXT3	Low affinity glucose transporter of the major facilitator superfamily, expression is induced in low or high glucose conditions	26	DLPSNSSQVMNMP	7.97117	0	0	510246	10855	14462	eb04472_JV297_phos	eb04472.raw	U	K.SSENSNADLPSNS#S#QVM*NMPEEK.G	2	1	20	3	53.7153	58.5228	55.2355	57.508	52.1041	65.7431	67.7876	73.8457	56.2454	64.8701	0.0386839	0.141511	1.15334	0.117246
3567	YJL165C	HAL5	Putative protein kinase; overexpression increases sodium and lithium tolerance, whereas gene disruption increases cation and low pH sensitivity and impairs potassium uptake, suggesting a role in regulation of Trk1p and/or Trk2p transporters	324	NNKNVDSGDEKDA	1000	0	0	510246	1658	2855	eb04472_JV297_phos	eb04472.raw	U	K.NVDS#GDEK.D	0	0	1	1	75.5838	71.9358	66.2805	58.9065	78.9928	82.3048	75.3952	77.8112	68.1766	78.626	0.106624	0.036546	1.15327	0.0368475
12	YHL023C	NPR3	Subunit of the conserved Npr2/3 complex that mediates downregulation of TORC1 activity upon amino acid limitation; subunit of SEA (Seh1-associated) complex; null mutant displays delayed meiotic DNA replication and double-strand break repair	486	TLKKVNSGEADTV	12.4311	0	19	510246	14089	18496	eb04472_JV297_phos	eb04472.raw	U	K.VNS#GEADTVYDSNIGHEASTDTPNLR.I	0	0	1	1	28.7278	32.1596	23.8805	32.4005	28.7595	37.3402	30.121	38.8935	29.2921	33.7785	0.135826	0.150389	1.15316	0.213736
667	YMR124W	YMR124W	Protein of unknown function; GFP-fusion protein localizes to the cell periphery, cytoplasm, bud, and bud neck; interacts with Crm1p in two-hybrid assay; YMR124W is not an essential gene; predicted to have a role in organelle organization	393	EGYRTMSLQSQNV	18.6027	0	0	510246	21762	27996	eb04472_JV297_phos	eb04472.raw	U	R.TMS#LQSQNVPQGFNPWSPNDNDR.K	0	0	1	1	20.7452	25.2901	23.6932	19.0691	23.2749	20.2613	30.7271	28.0972	22.1994	25.5901	0.126603	0.183887	1.15274	0.262223
2862	YCL005W	LDB16	Protein of unknown function; null mutants have decreased net negative cell surface charge; GFP-fusion protein expression is induced in response to the DNA-damaging agent MMS; native protein is detected in purified mitochondria	241	KLRRNASDADIVN	1000	0	0	510246	16799	21864	eb04472_JV297_phos	eb04472.raw	U	R.NAS#DADIVNIK.I	0	0	3	3	243.445	215.208	203.599	209.983	271.373	252.192	239.409	242.296	218.059	251.318	0.0806099	0.0574881	1.15252	0.0265125
783	YCR095C	OCA4	Cytoplasmic protein required for replication of Brome mosaic virus in S. cerevisiae, which is a model system for studying replication of positive-strand RNA viruses in their natural hosts	87	SNANLYSNNNSTL	6.59058	-10	0	510246	16189	21097	eb04472_JV297_phos	eb04472.raw	U	K.SSSVSNANLYS#NNNS#TLSLQEEK.K	1	0	5	3	65.3546	65.2556	54.4651	64.984	73.9497	76.55	69.4328	68.1513	62.5148	72.0209	0.0858796	0.0543136	1.15206	0.0287209
761	YJL197W	UBP12	Ubiquitin carboxyl-terminal hydrolase, ubiquitin-specific protease present in the nucleus and cytoplasm that cleaves ubiquitin from ubiquitinated proteins	845	FSKPFQSGDDEEN	1000	0	0	510246	7120	9743	eb04472_JV297_phos	eb04472.raw	U	K.PFQS#GDDEENK.E	0	0	1	1	46.9635	52.1056	47.0011	46.0848	67.6516	49.9106	52.9312	50.8385	48.0388	55.333	0.0571218	0.150164	1.15184	0.146528
2086	YLR429W	CRN1	Coronin, cortical actin cytoskeletal component that associates with the Arp2p/Arp3p complex to regulate its activity; plays a role in regulation of actin patch assembly	443	EKPISESEKEVKQ	4.08456	-2	0	510246	9004	12133	eb04472_JV297_phos	eb04472.raw	U	K.VEKPISES#EK.E	0	0	1	1	48.8755	41.1332	43.5971	43.7191	57.2866	46.9802	49.9748	49.9559	44.3312	51.0494	0.0734318	0.0859918	1.15154	0.0492168
123	YLR357W	RSC2	Component of the RSC chromatin remodeling complex; required for expression of mid-late sporulation-specific genes; involved in telomere maintenance	648	LPKTGYSSSKLSS	0	-3	2	510246	1838	3087	eb04472_JV297_phos	eb04472.raw	U	K.TGYS#SSK.L	0	0	1	1	113.621	96.5841	86.7882	75.8713	100.467	124.564	102.053	102.209	93.2161	107.323	0.17185	0.10735	1.15134	0.202697
735	YCR091W	KIN82	Putative serine/threonine protein kinase implicated in the regulation of phospholipid asymmetry through the activation of phospholipid translocases (flippases) Lem3p-Dnf1p/Dnf2p; similar to Fpk1p	501	DGFRTNSFVGTEE	12.0917	-2	7	510246	22108	28401	eb04472_JV297_phos	eb04472.raw	R	R.TNS#FVGTEEYLAPEVIR.G	0	0	1	1	32.4442	36.8936	36.1331	41.5365	42.7848	36.5843	43.2084	46.6553	36.7519	42.3082	0.101628	0.0990626	1.15119	0.0950907
1814	YOL130W	ALR1	Plasma membrane Mg(2+) transporter, expression and turnover are regulated by Mg(2+) concentration; overexpression confers increased tolerance to Al(3+) and Ga(3+) ions	19	NLSRSNSLANTMV	0	-2	7	510246	12641	16702	eb04472_JV297_phos	eb04472.raw	U	R.SNS#LANTMVSM*K.T	0	0	1	1	77.3404	70.221	59.8887	54.7241	80.7822	67.2282	74.0468	79.7336	65.5436	75.4477	0.155113	0.0825418	1.15111	0.14769
2578	YCR088W	ABP1	Actin-binding protein of the cortical actin cytoskeleton, important for activation of the Arp2/3 complex that plays a key role actin in cytoskeleton organization	389	SEPTIISPKPFSK	33.6572	0	0	510246	12649	16712	eb04472_JV297_phos	eb04472.raw	U	K.KSEPTIIS#PK.P	0	0	3	3	340.623	346.718	340.959	376.586	429.661	400.266	364.544	422.582	351.221	404.263	0.0487998	0.07246	1.15102	0.020435
2332	YDR466W	PKH3	Protein kinase with similarity to mammalian phosphoinositide-dependent kinase 1 (PDK1) and yeast Pkh1p and Pkh2p, two redundant upstream activators of Pkc1p; identified as a multicopy suppressor of a pkh1 pkh2 double mutant	673	DKISNVSFDSKAS	15.0073	0	0	510247	15679	21092	eb04473_JV297_phos	eb04473.raw	U	K.ISNVS#FDS#K.A	1	1	2	1	62.1042	61.7103	70.736	69.4409	79.9224	59.8822	87.4559	76.4088	65.9978	75.9173	0.0720574	0.153339	1.1503	0.165723
385	YBR211C	AME1	Essential kinetochore protein associated with microtubules and spindle pole bodies; component of the kinetochore sub-complex COMA (Ctf19p, Okp1p, Mcm21p, Ame1p); involved in spindle checkpoint maintenance	101	KSLISESPQNVRN	17.0091	0	0	510246	8128	11032	eb04472_JV297_phos	eb04472.raw	U	K.SLISES#PQNVR.N	0	0	2	2	130.04	152.792	135.424	139.365	183.782	155.394	139.447	162.478	139.405	160.275	0.0696443	0.114767	1.14971	0.0915637
2354	YOR267C	HRK1	Protein kinase implicated in activation of the plasma membrane H(+)-ATPase Pma1p in response to glucose metabolism; plays a role in ion homeostasis	664	KAHSIASDNKSSQ	7.97117	-3	0	510246	1900	3165	eb04472_JV297_phos	eb04472.raw	U	K.AHSIAS#DNK.S	0	0	1	1	86.5419	82.5189	94.96	94.1171	106.335	99.9937	103.562	101.846	89.5345	102.934	0.0672025	0.0261807	1.14966	0.00661409
3220	YOR304W	ISW2	ATP-dependent DNA translocase involved in chromatin remodeling; ATPase component that, with Itc1p, forms a complex required for repression of a-specific genes, INO1, and early meiotic genes during mitotic growth	831	DIRNEGSDAEEEE	29.5335	0	0	510246	3070	4648	eb04472_JV297_phos	eb04472.raw	U	R.NEGS#DAEEEEGEYK.N	0	0	1	1	13.0853	19.4725	16.25	18.7162	19.9167	24.5575	17.5159	15.6324	16.881	19.4056	0.170629	0.198717	1.14955	0.334569
3798	YCR031C	RPS14A	Ribosomal protein 59 of the small subunit, required for ribosome assembly and 20S pre-rRNA processing; mutations confer cryptopleurine resistance; nearly identical to Rps14Bp and similar to E. coli S11 and rat S14 ribosomal proteins	11	VQARDNSQVFGVA	1000	0	0	510246	7721	10513	eb04472_JV297_phos	eb04472.raw	R	R.DNS#QVFGVAR.I	0	0	1	1	66.0596	61.5736	63.8549	74.3029	99.3626	64.8679	72.8222	68.3206	66.4478	76.3433	0.0834916	0.205492	1.14892	0.279223
3142	YPL116W	HOS3	Trichostatin A-insensitive homodimeric histone deacetylase (HDAC) with specificity in vitro for histones H3, H4, H2A, and H2B; similar to Hda1p, Rpd3p, Hos1p, and Hos2p; deletion results in increased histone acetylation at rDNA repeats	629	KKGDEDSDHELKE	1000	0	0	510246	3145	4747	eb04472_JV297_phos	eb04472.raw	U	K.KGDEDS#DHELK.E	0	0	1	1	57.2286	64.8137	56.2556	57.3119	84.5123	63.2767	61.9242	60.982	58.9025	67.6738	0.0673979	0.166462	1.14891	0.192292
1067	YJL138C	TIF2	Translation initiation factor eIF4A, identical to Tif1p; DEA(D/H)-box RNA helicase that couples ATPase activity to RNA binding and unwinding; forms a dumbbell structure of two compact domains connected by a linker; interacts with eIF4G	129	ACIGGTSFVEDAE	0	-1	0	510246	21169	27310	eb04472_JV297_phos	eb04472.raw	R	K.VHACIGGTS#FVEDAEGLR.D	0	0	2	2	51.158	55.5877	53.4762	61.5205	63.4917	64.9342	69.6307	56.6658	55.4356	63.6806	0.080124	0.0841844	1.14873	0.055626
2703	YGL019W	CKB1	Beta regulatory subunit of casein kinase 2 (CK2), a Ser/Thr protein kinase with roles in cell growth and proliferation; CK2, comprised of CKA1, CKA2, CKB1 and CKB2, has many substrates including transcription factors and all RNA polymerases	260	WLRQYPSTEEDWE	0	-2	1	510246	21473	27660	eb04472_JV297_phos	eb04472.raw	U	R.QYPS#TEEDWEEFAK.C	0	0	1	1	79.7424	86.769	79.5845	88.2225	122.556	70.8217	98.292	92.3434	83.5796	96.0033	0.0545734	0.221601	1.14865	0.296971
1897	YOL051W	GAL11	Subunit of the RNA polymerase II mediator complex; associates with core polymerase subunits to form the RNA polymerase II holoenzyme; affects transcription by acting as target of activators and repressors; forms part of the tail domain of mediator	831	NMKTVQSPMGAQP	48.3154	0	0	510247	20454	27135	eb04473_JV297_phos	eb04473.raw	U	K.TVQS#PM*GAQPSYNSAIIENAFR.K	0	0	2	2	34.6191	33.2642	33.718	34.6094	36.7889	37.738	36.9368	44.9627	34.0527	39.1066	0.0198045	0.100399	1.14841	0.0442444
2486	YDR379W	RGA2	GTPase-activating protein for the polarity-establishment protein Cdc42p; implicated in control of septin organization, pheromone response, and haploid invasive growth; regulated by Pho85p and Cdc28p	733	LESQQRSPNSSSG	15.0073	0	0	510246	4096	5947	eb04472_JV297_phos	eb04472.raw	U	R.S#PNSSSGGTTNIAQK.E	0	0	1	1	66.1911	69.0533	60.3884	75.4923	69.1971	76.5765	78.8835	86.4798	67.7813	77.7842	0.0926299	0.0915157	1.14758	0.0796238
924	YLL021W	SPA2	Component of the polarisome, which functions in actin cytoskeletal organization during polarized growth; acts as a scaffold for Mkk1p and Mpk1p cell wall integrity signaling components; potential Cdc28p substrate	1262	AHDEKHYSDDDDS	6.59058	0	8	510246	13182	17368	eb04472_JV297_phos	eb04472.raw	U	K.HY#SDDDDSSYQFVPM*K.H	0	0	4	4	150.857	145.302	150.945	175.857	204.117	161.997	171.782	176.502	155.74	178.6	0.0877638	0.101076	1.14678	0.0900109
1094	YNL074C	MLF3	Serine-rich protein of unknown function, predicted to be palmitoylated; overproduction suppresses the growth inhibition caused by exposure to the immunosuppressant leflunomide	87	LDNVIPTSRSASN	9.10728	-9	1	510246	19791	25641	eb04472_JV297_phos	eb04472.raw	U	R.KNS#NNVSSPLDNVIPT#SR.S	1	1	3	1	27.4253	36.3992	36.0186	35.6288	36.847	38.9844	41.9219	37.5274	33.868	38.8202	0.12716	0.0580074	1.14622	0.0876853
3492	YEL058W	PCM1	Essential N-acetylglucosamine-phosphate mutase; converts GlcNAc-6-P to GlcNAc-1-P, which is a precursor for the biosynthesis of chitin and for the formation of N-glycosylated mannoproteins and glycosylphosphatidylinositol anchors	67	GVMITASHNPYQD	0	-8	4	510246	20710	26768	eb04472_JV297_phos	eb04472.raw	U	K.LQGQYVGVM*ITAS#HNPYQDNGVK.I	0	0	3	2	138.524	121.148	137.256	101.776	45.4458	196.407	131.171	198.482	124.676	142.876	0.137908	0.504502	1.14598	0.640725
879	YBR059C	AKL1	Ser-Thr protein kinase, member (with Ark1p and Prk1p) of the Ark kinase family; involved in endocytosis and actin cytoskeleton organization	407	AVSRIPSQNVGQE	1000	0	0	510246	19584	25381	eb04472_JV297_phos	eb04472.raw	U	R.IPS#QNVGQELEEEK.E	0	0	2	2	152.661	165.311	145.115	126.295	176.74	169.993	162.987	165.294	147.346	168.754	0.110765	0.0359705	1.14529	0.0491974
466	YHR158C	KEL1	Protein required for proper cell fusion and cell morphology; functions in a complex with Kel2p to negatively regulate mitotic exit, interacts with Tem1p and Lte1p; localizes to regions of polarized growth; potential Cdc28p substrate	848	LEADNHSLEDKVN	1000	0	0	510246	13166	17348	eb04472_JV297_phos	eb04472.raw	U	K.CEILEADNHS#LEDK.V	0	0	2	2	127.817	101.455	138.557	129.092	125.473	145.833	152.794	144.959	124.23	142.265	0.128161	0.0824576	1.14517	0.117991
2554	YBR245C	ISW1	Member of the imitation-switch (ISWI) class of ATP-dependent chromatin remodeling complexes; ATPase that forms a complex with Ioc2p and Ioc4p to regulate transcription elongation, and a complex with Ioc3p to repress transcription initiation	846	AAYGDISDEEEKK	36.5564	0	0	510246	7375	10077	eb04472_JV297_phos	eb04472.raw	U	K.AAYGDIS#DEEEK.K	0	0	2	2	101.001	89.399	86.4238	98.5217	111.657	100.803	104.823	112.522	93.8365	107.451	0.0748325	0.0522343	1.14509	0.0231274
3644	YDR359C	EAF1	Component of the NuA4 histone acetyltransferase complex; acts as a platform for assembly of NuA4 subunits into the native complex; required for initiation of pre-meiotic DNA replication, likely due to its requirement for expression of IME1	951	PPKSSPSQSSLSN	4.08456	-3	12	510247	10885	14965	eb04473_JV297_phos	eb04473.raw	U	K.SSPS#QSSLSNISNINSAPR.I	0	0	1	1	23.3145	28.7617	24.0471	23.5521	27.644	28.4825	28.0304	29.959	24.9188	28.529	0.103536	0.0355104	1.14488	0.0403946
788	YDR389W	SAC7	GTPase activating protein (GAP) for Rho1p, involved in signaling to the actin cytoskeleton, null mutations suppress tor2 mutations and temperature sensitive mutations in actin; potential Cdc28p substrate	37	NNPKSMSSENITV	6.59058	-2	5	510246	4549	6512	eb04472_JV297_phos	eb04472.raw	U	K.SM*S#SENITVPR.S	0	0	1	1	30.0901	23.1019	19.0191	16.3506	27.1095	23.0459	28.352	22.8501	22.1404	25.3394	0.270228	0.110842	1.14448	0.370428
2472	YBR114W	RAD16	Protein that recognizes and binds damaged DNA in an ATP-dependent manner (with Rad7p) during nucleotide excision repair; subunit of Nucleotide Excision Repair Factor 4 (NEF4) and the Elongin-Cullin-Socs (ECS) ligase complex	49	SENVNDSQDEEYR	9.39406	-6	10	510246	9452	12698	eb04472_JV297_phos	eb04472.raw	U	K.GNSENVNDS#QDEEYRDDATLVK.S	0	0	2	2	59.4991	64.2667	59.1184	54.3973	64.1889	68.4614	61.7634	77.1342	59.3204	67.887	0.0679726	0.0995491	1.14441	0.0723452
2112	YLR278C	YLR278C	Zinc-cluster protein; GFP-fusion protein localizes to the nucleus; mutant shows moderate growth defect on caffeine; has a prion-domain like fragment that increases frequency of [URE3]; YLR278C is not an essential gene	1143	ESNFSTSPLRADY	0	-5	0	510246	11329	15053	eb04472_JV297_phos	eb04472.raw	U	R.DVEESNFSTS#PLR.A	0	0	4	4	213.26	235.595	193.053	181.804	263.576	228.443	212.912	237.629	205.928	235.64	0.114972	0.0901149	1.14428	0.110911
1668	YHR146W	CRP1	Protein that binds to cruciform DNA structures	271	SSVTEKSPALPQA	83.1372	0	0	510246	20592	26628	eb04472_JV297_phos	eb04472.raw	U	K.S#PALPQADDPIVETK.E	0	0	2	2	146.662	175.979	159.606	164.643	197.645	174.926	193.714	173.504	161.722	184.947	0.0751442	0.0676385	1.14361	0.0373595
931	YDR239C	YDR239C	Protein of unknown function that may interact with ribosomes, based on co-purification experiments	254	PILRNVSAESSLS	15.0073	0	0	510247	15341	20654	eb04473_JV297_phos	eb04473.raw	U	R.NVS#AESSLSYVK.P	0	0	2	2	121.818	121.811	115.78	141.888	168.223	130.439	152.04	122.496	125.324	143.299	0.0909875	0.14503	1.14343	0.180174
2359	YKL213C	DOA1	WD repeat protein required for ubiquitin-mediated protein degradation, forms complex with Cdc48p, plays a role in controlling cellular ubiquitin concentration; also promotes efficient NHEJ in postdiauxic/stationary phase	457	ASSSAVSPSKTSV	5.65887	-18	2	510246	11854	15711	eb04472_JV297_phos	eb04472.raw	U	K.NTNGISLDQPNDNASSSAVS#PSK.T	0	0	3	2	61.5903	55.9033	56.0266	57.1682	63.8751	67.1752	62.6664	69.9648	57.6721	65.9204	0.0463566	0.0500859	1.14302	0.00814199
70	YER114C	BOI2	Protein implicated in polar growth, functionally redundant with Boi1p; interacts with bud-emergence protein Bem1p; contains an SH3 (src homology 3) domain and a PH (pleckstrin homology) domain	375	VRKTSQSLEDLPS	62.6585	0	0	510246	21078	27204	eb04472_JV297_phos	eb04472.raw	U	R.KTSQS#LEDLPSQQNFIPTPR.N	1	1	3	2	90.4615	99.2562	91.5247	70.7479	112.702	95.0212	91.5999	102.983	87.9976	100.577	0.138064	0.093318	1.14295	0.15239
3542	YML057W	CMP2	Calcineurin A; one isoform (the other is CNA1) of the catalytic subunit of calcineurin, a Ca++/calmodulin-regulated protein phosphatase which regulates Crz1p (a stress-response transcription factor), the other calcineurin subunit is CNB1	489	QPATSASPKHASI	2.80603	-11	0	510246	3252	4885	eb04472_JV297_phos	eb04472.raw	U	K.SEATPQPATSAS#PK.H	0	0	1	1	16.1923	11.7719	16.1563	22.3105	21.5086	22.0912	17.9489	14.375	16.6077	18.9809	0.260807	0.188348	1.1429	0.43045
3101	YBR007C	DSF2	Deletion suppressor of mpt5 mutation	314	FESESSSFSKLKL	0	-10	2	510247	8370	11767	eb04473_JV297_phos	eb04473.raw	U	K.TQSSFESESSS#FSK.L	0	0	1	1	46.6409	37.9456	39.8391	36.1255	61.2723	45.747	32.5207	43.923	40.1378	45.8657	0.114427	0.25774	1.14271	0.401174
791	YCR061W	YCR061W	Protein of unknown function; green fluorescent protein (GFP)-fusion protein localizes to the cytoplasm in a punctate pattern; induced by treatment with 8-methoxypsoralen and UVA irradiation	219	TPVMVNSARGSPS	31.9355	0	0	510246	22255	28573	eb04472_JV297_phos	eb04472.raw	U	K.EYRPVDTIPLNDLESTPVMVNS#AR.G	0	0	2	2	70.0389	74.3028	60.3676	72.7868	84.7795	79.6263	64.7075	87.7009	69.374	79.2035	0.0902105	0.129089	1.14169	0.152128
[truncated: 1,931 more rows]
