# Supplementary figures and images for: Phosphate starvation signaling increases mitochondrial membrane potential through respiration-independent mechanisms
Source: eLife journal article supplement (doi:10.7554/elife.84282), 2024-01-22

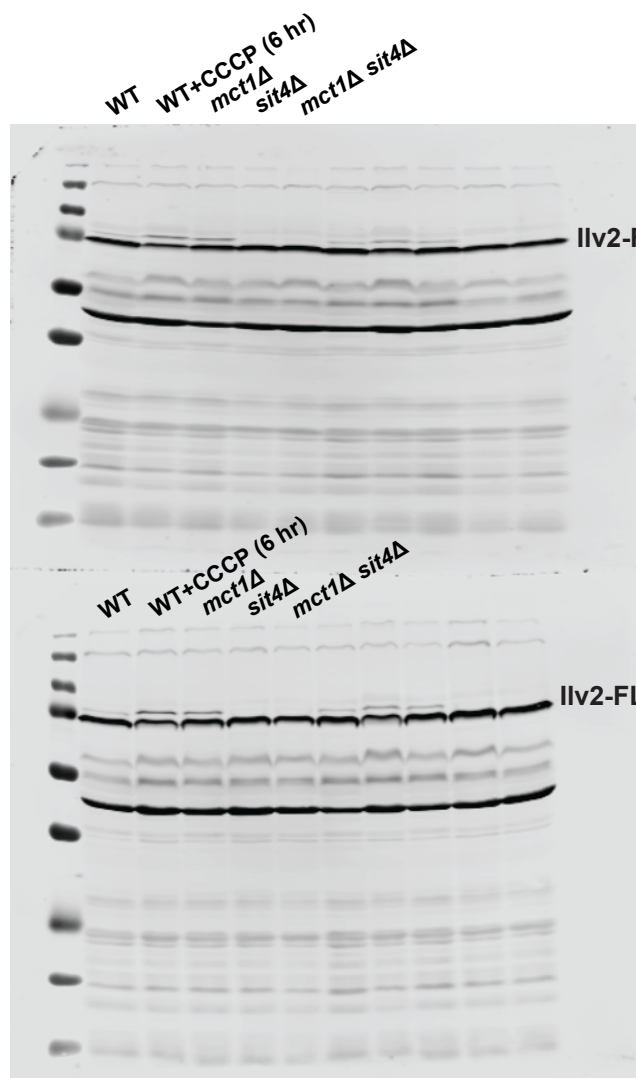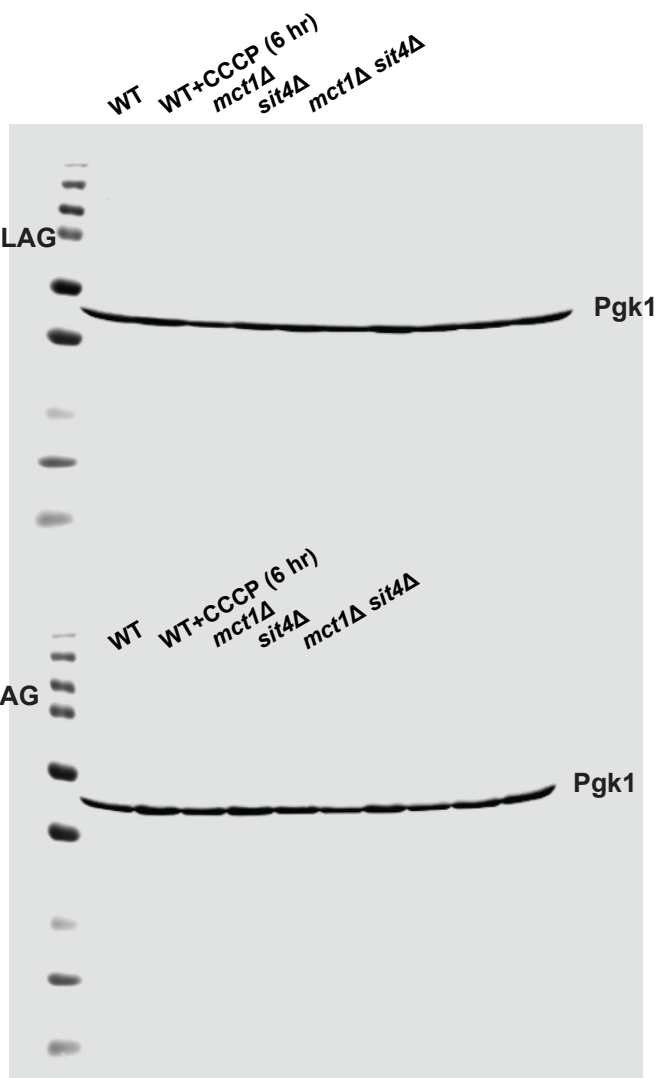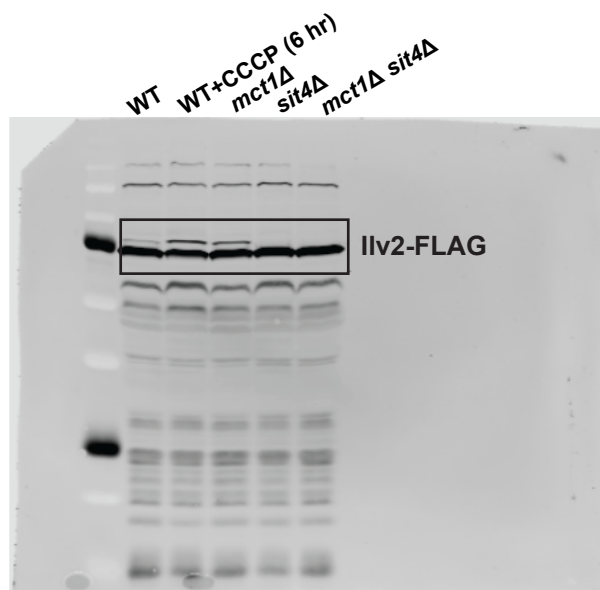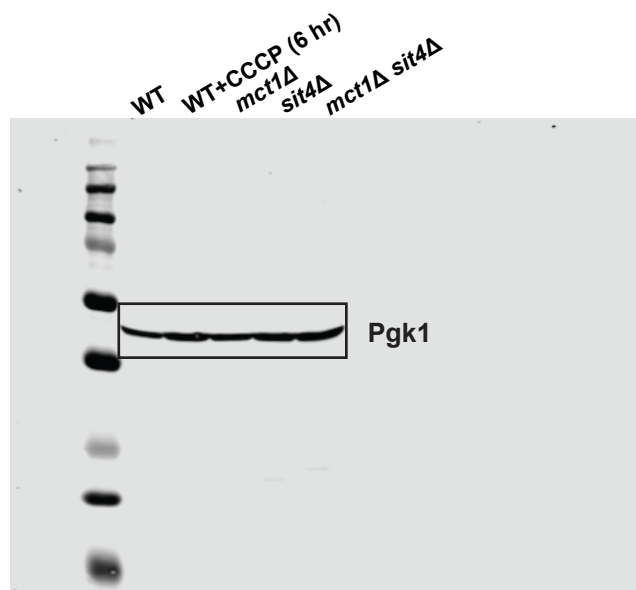

Supplement: fig1-data1 [file elife-84282-fig1-data1-v2.zip]

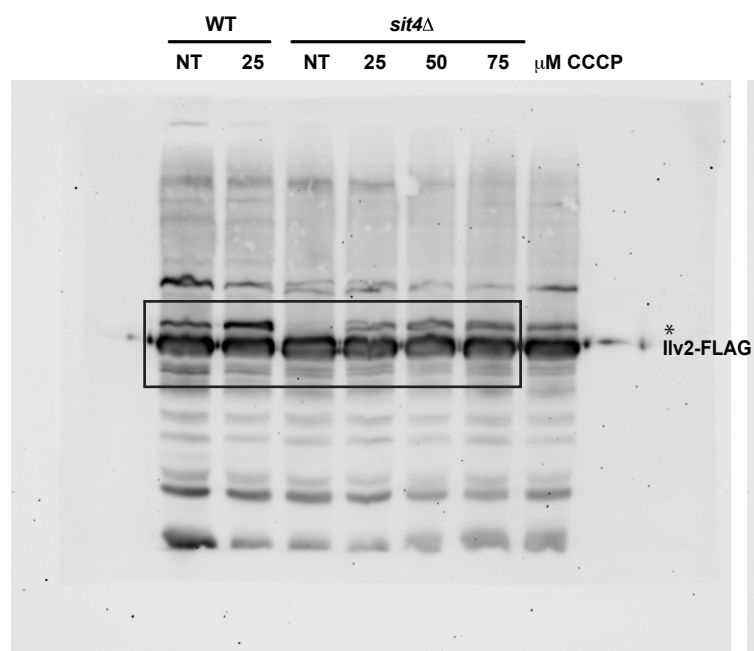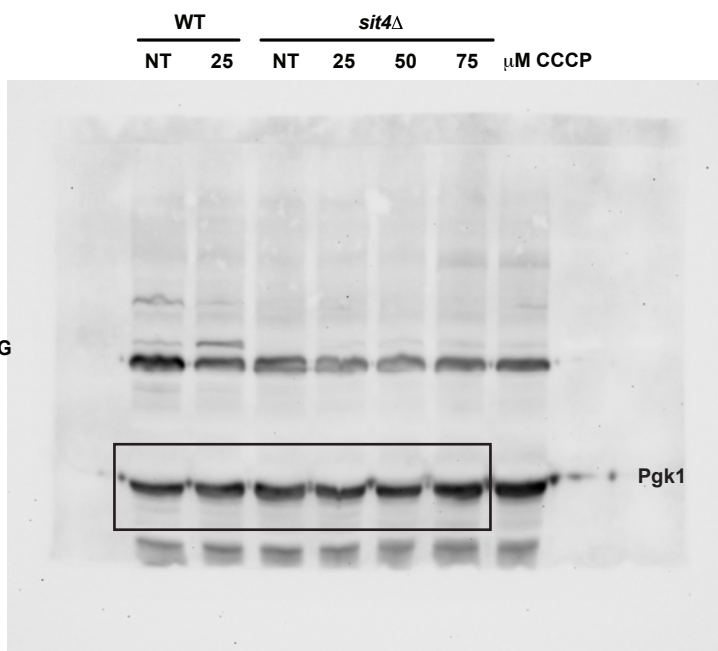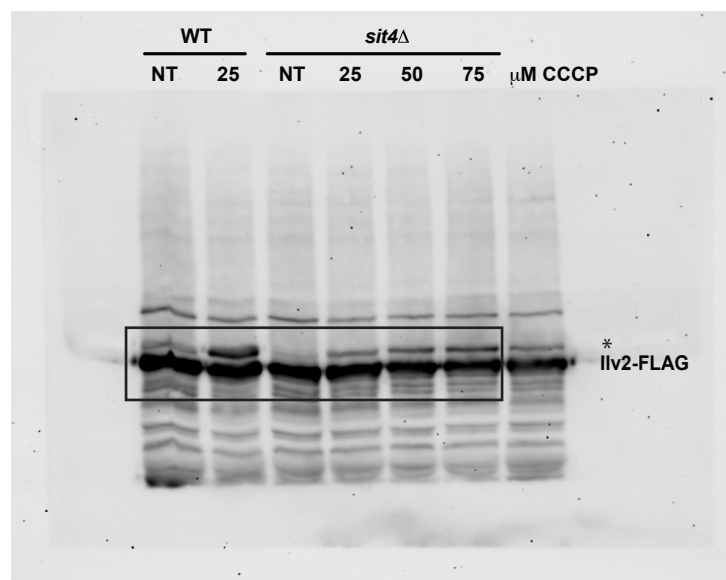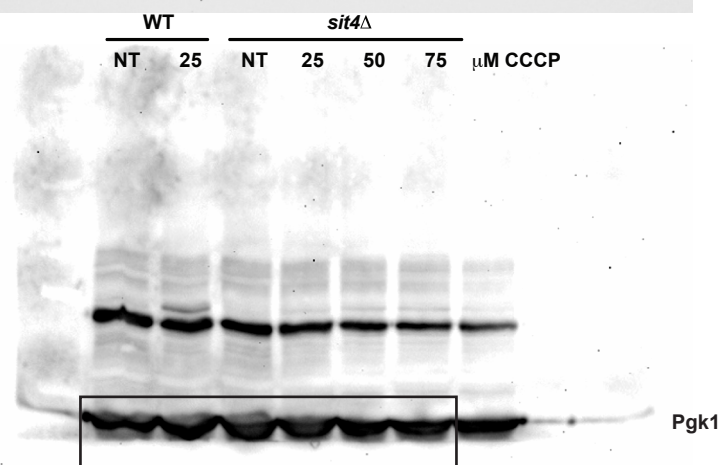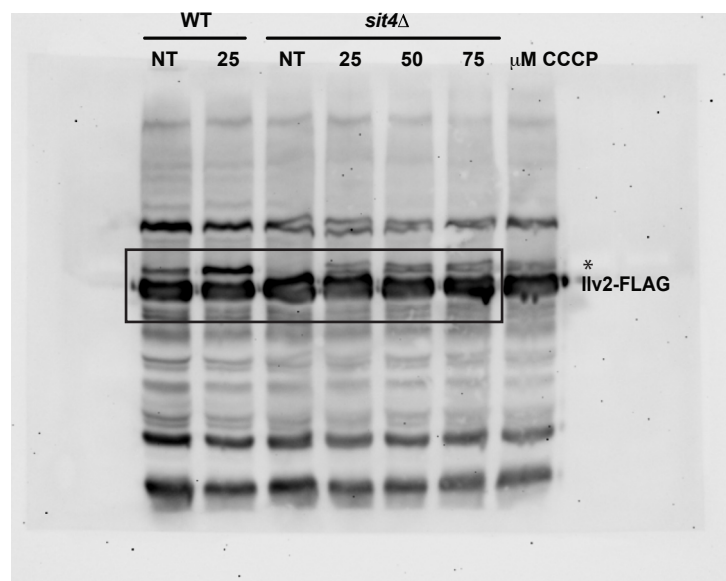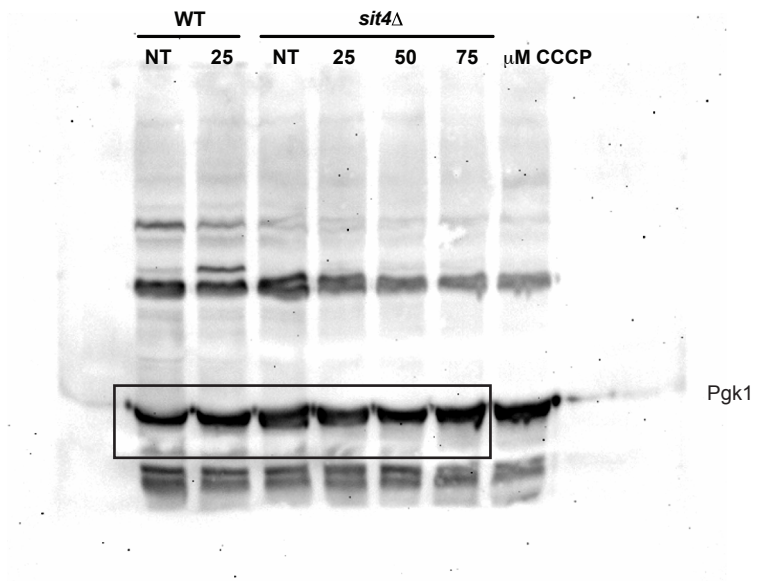

Supplement: fig1-figsupp1-data1 [file elife-84282-fig1-figsupp1-data1-v2.zip]

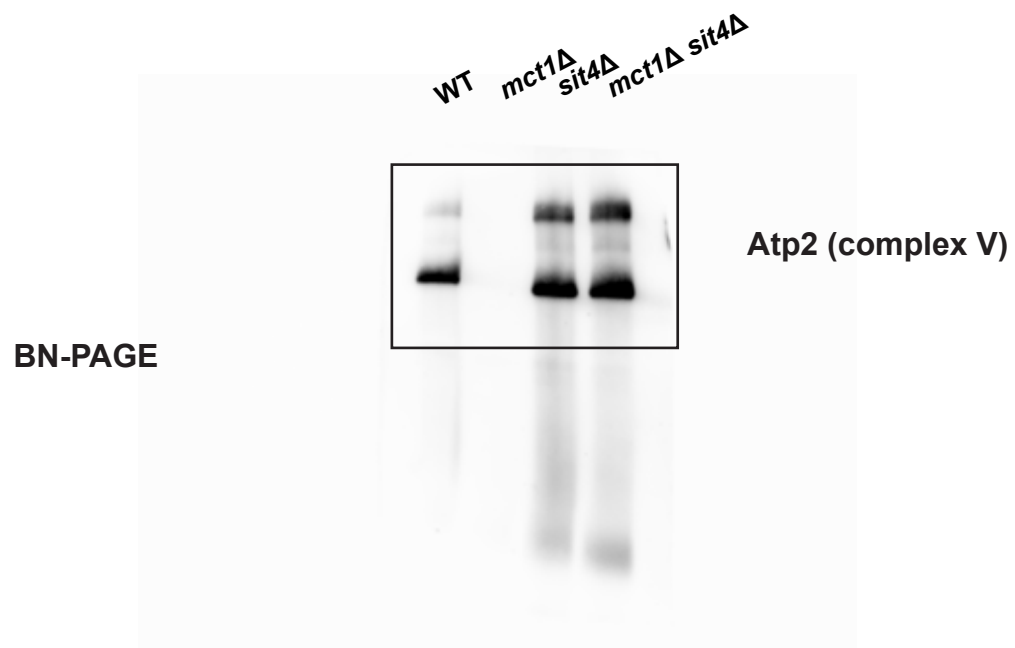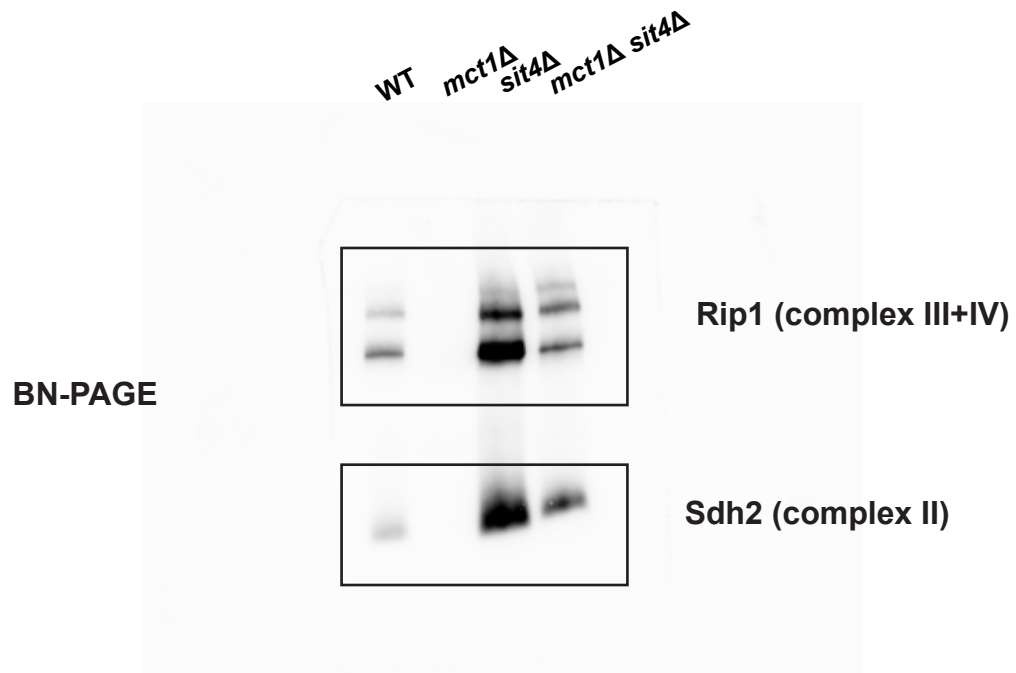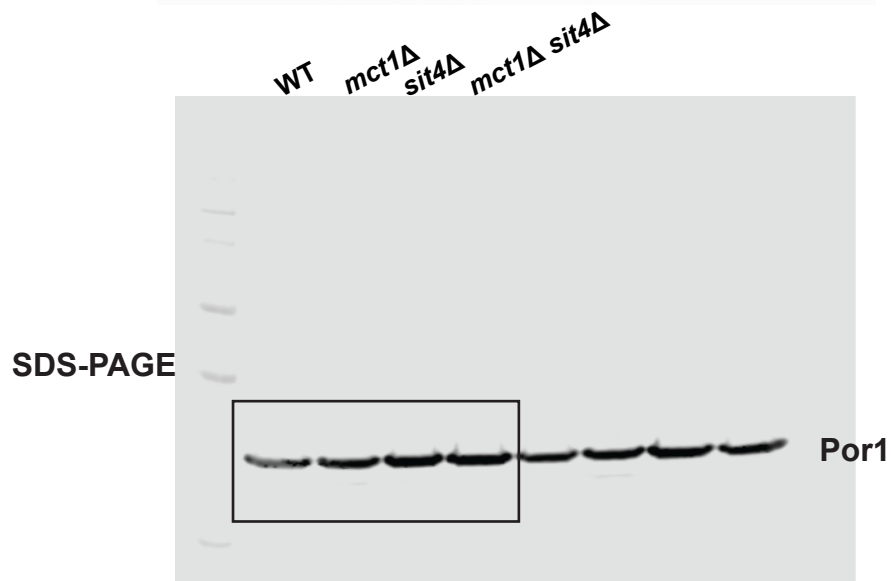

Supplement: fig2-data1 [file elife-84282-fig2-data1-v2.zip]

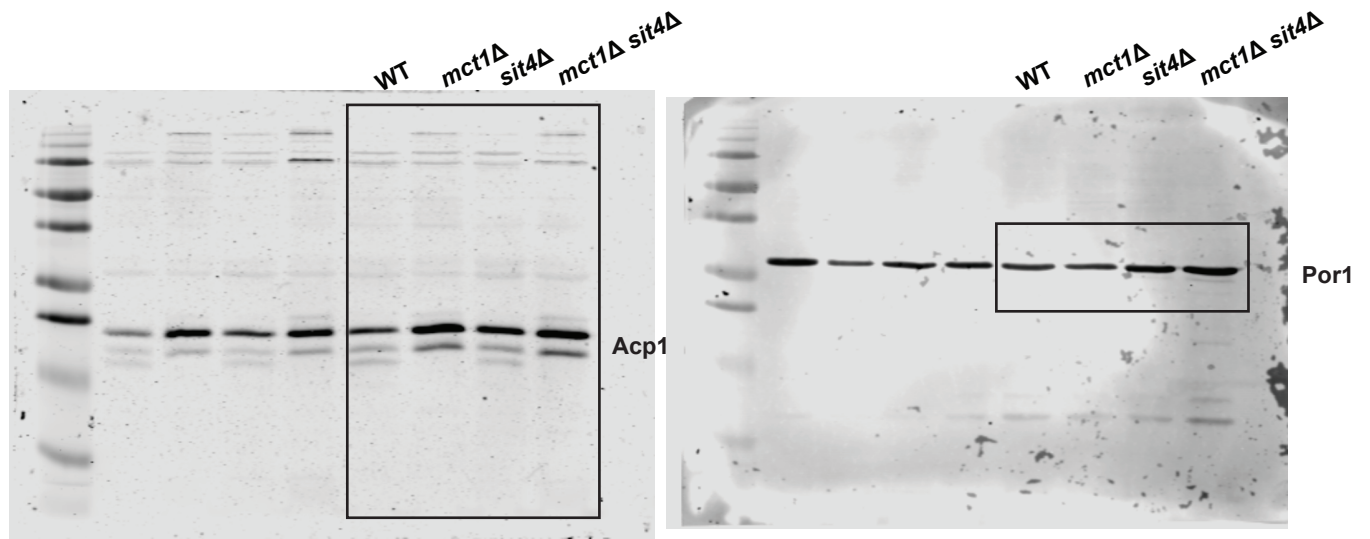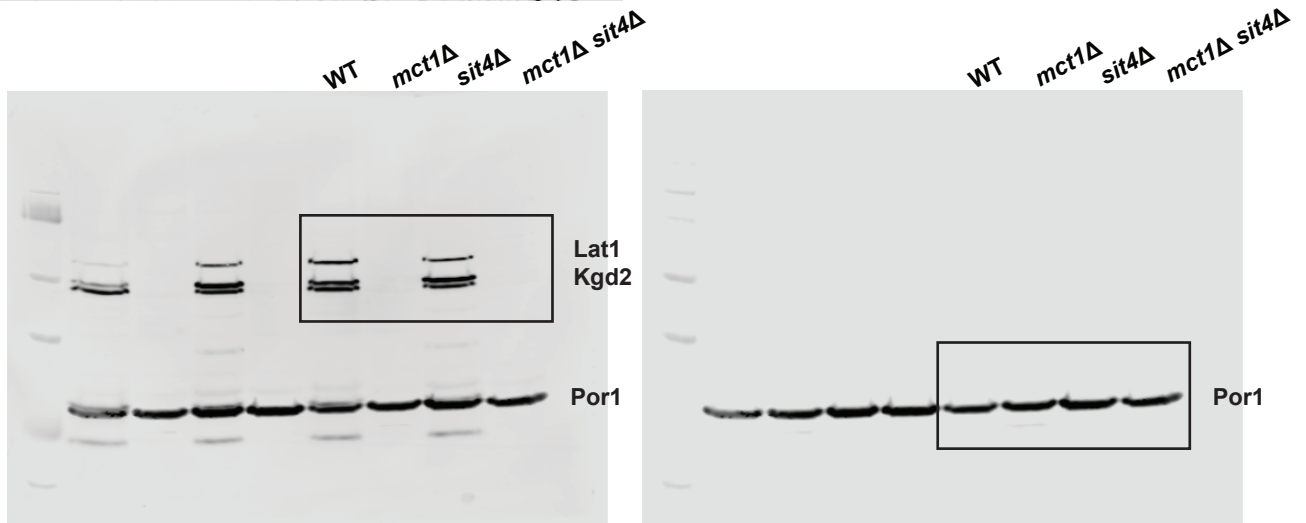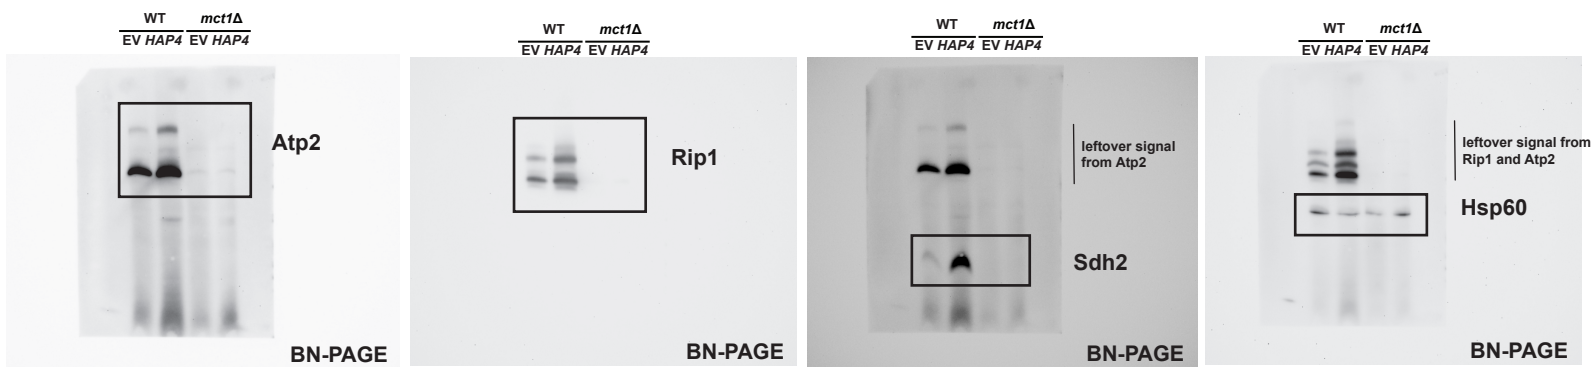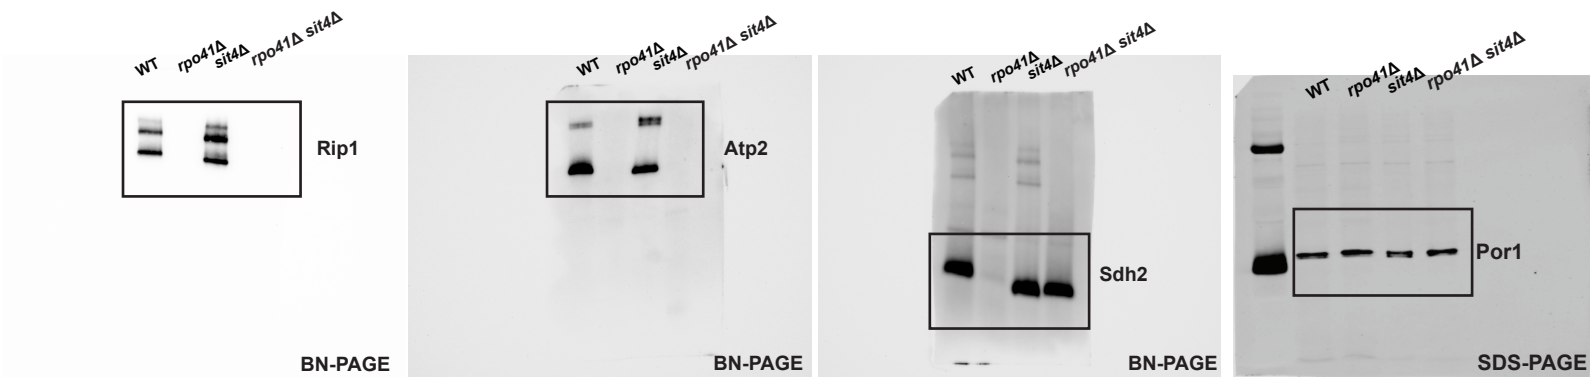

Supplement: fig2-figsupp1-data1 [file elife-84282-fig2-figsupp1-data1-v2.zip]

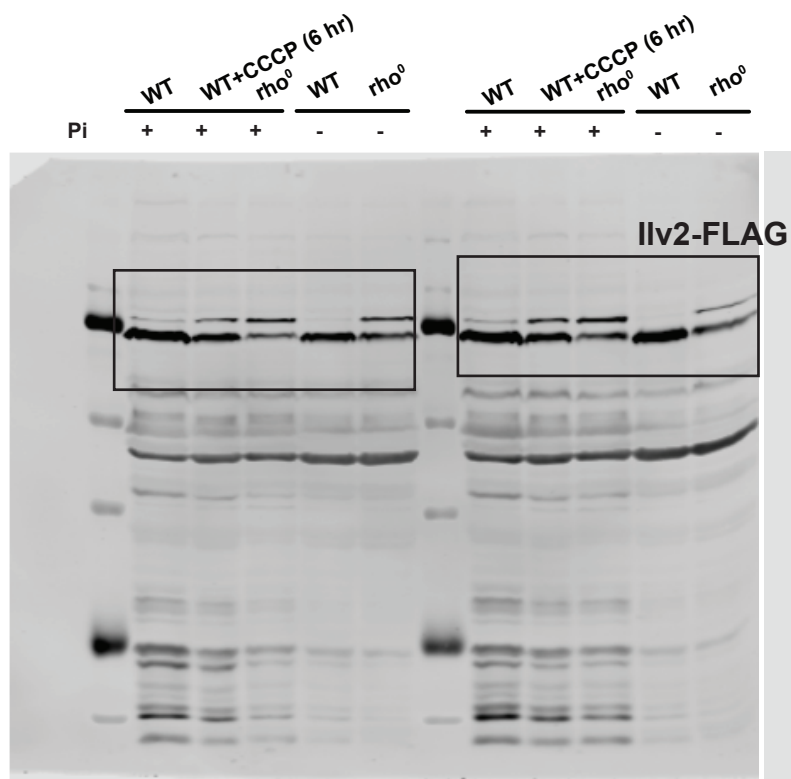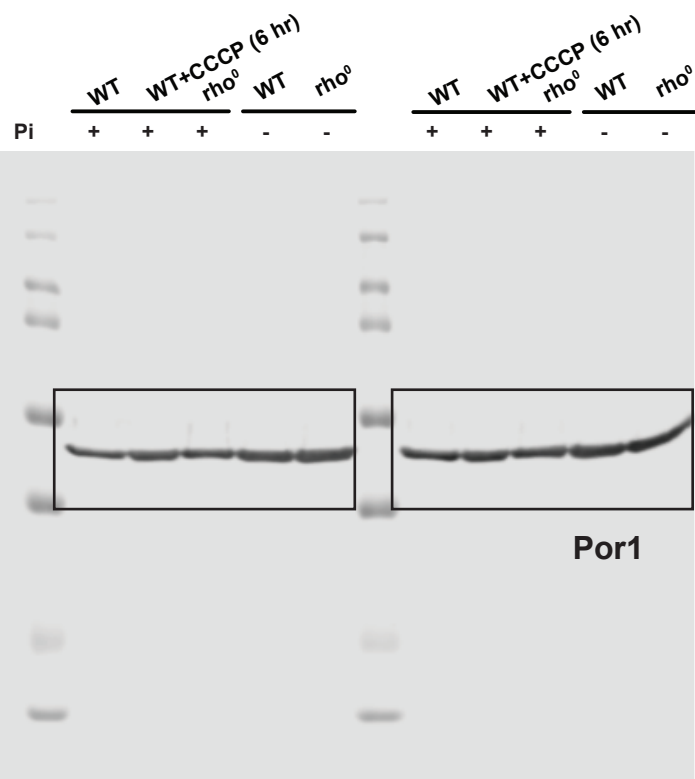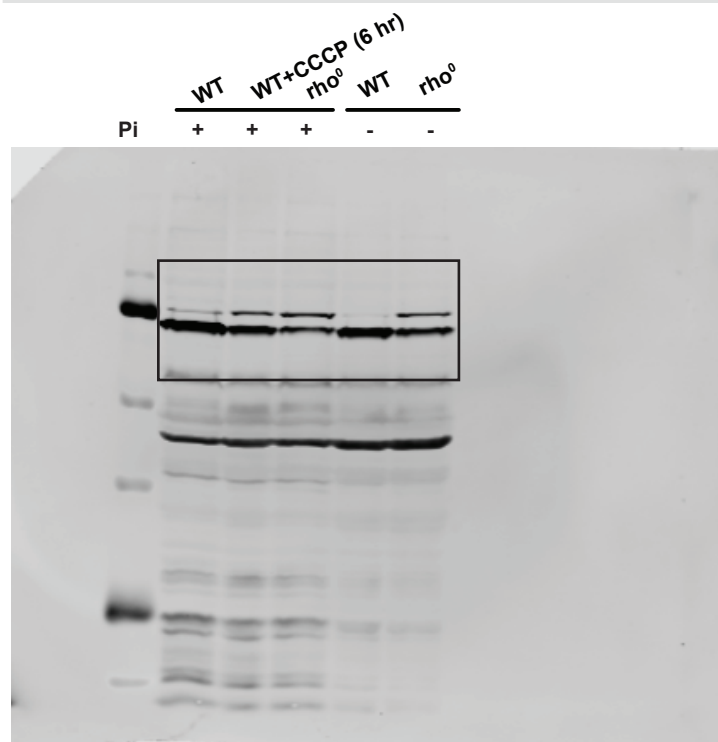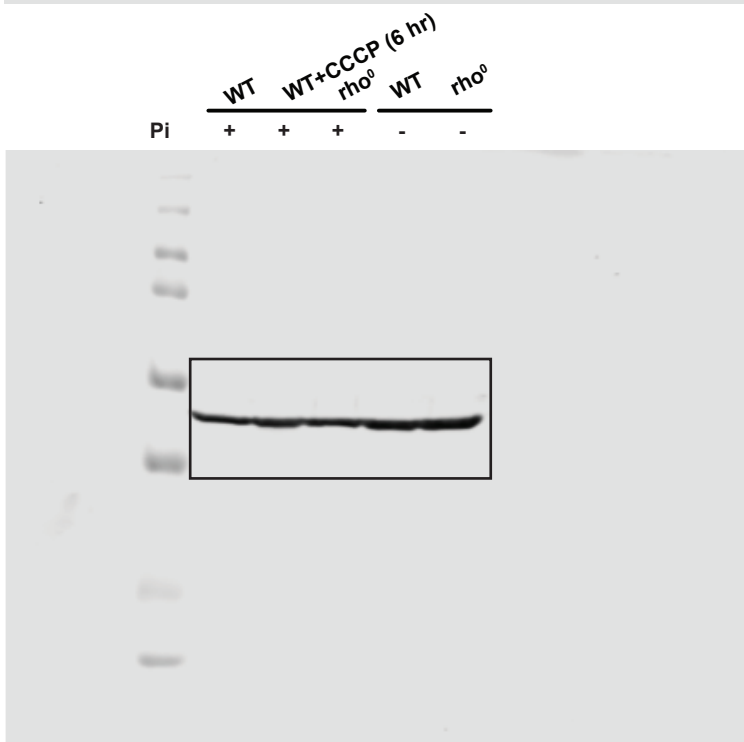

Supplement: fig3-data1 [file elife-84282-fig3-data1-v2.zip]

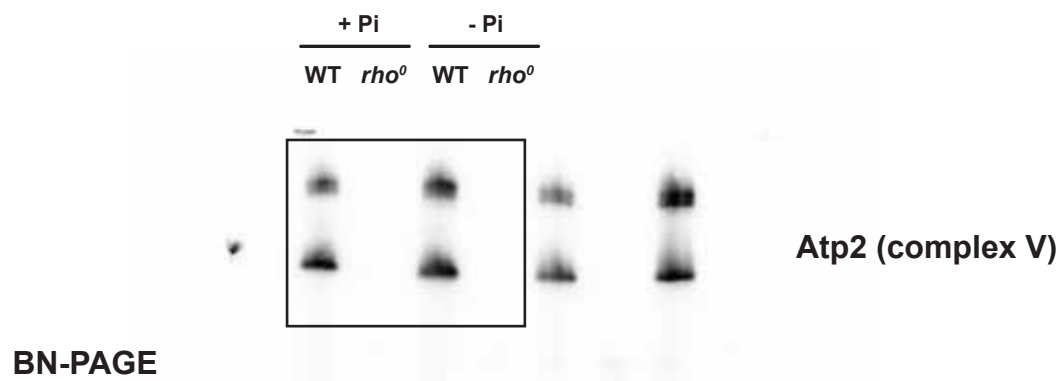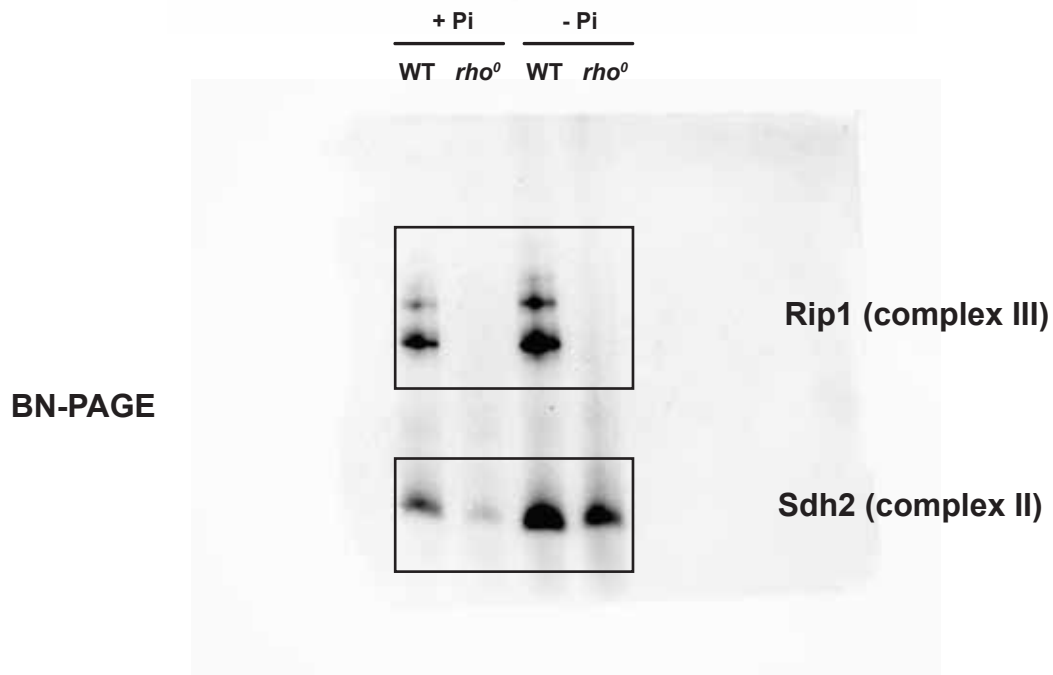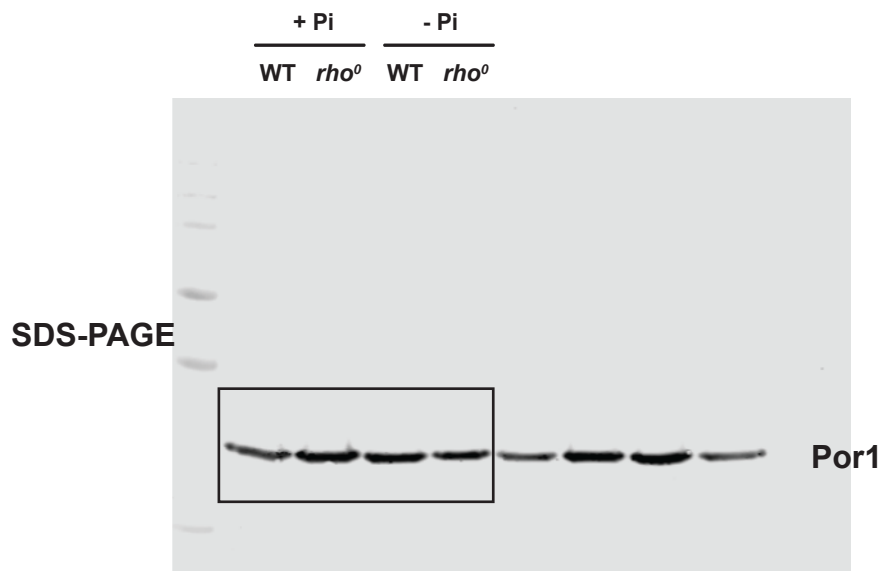

Supplement: fig4-data1 [file elife-84282-fig4-data1-v2.zip]

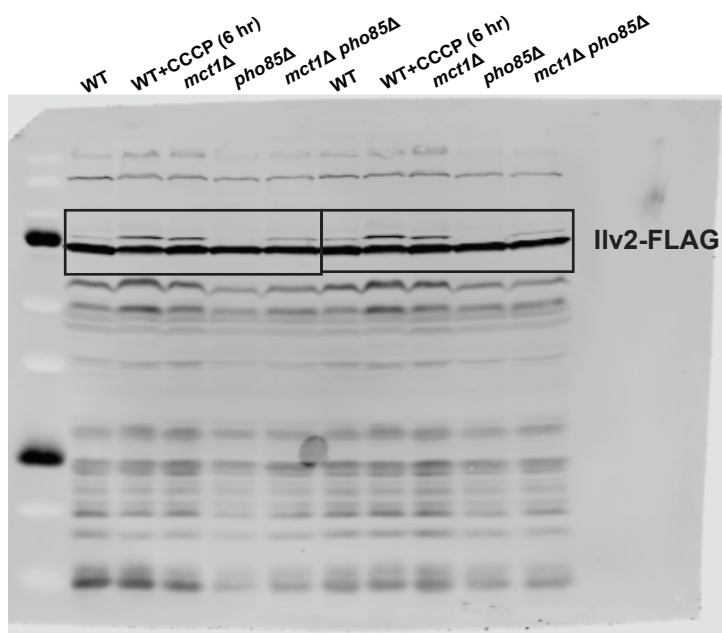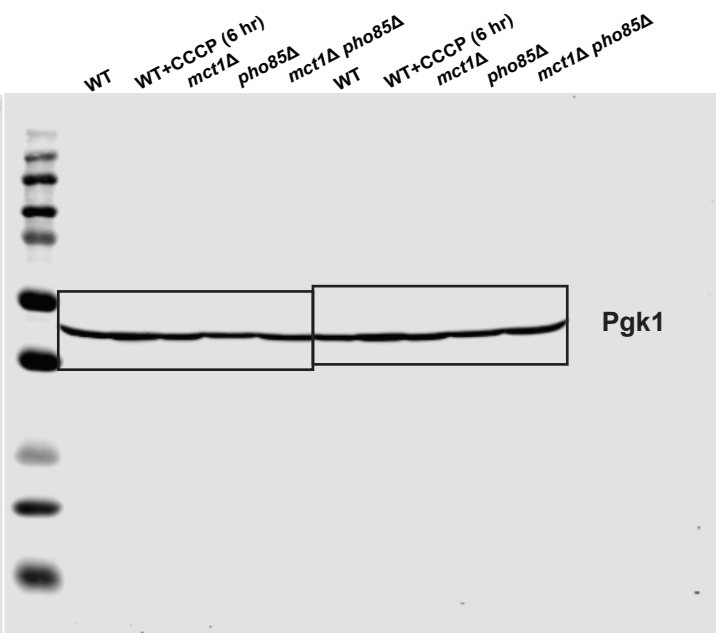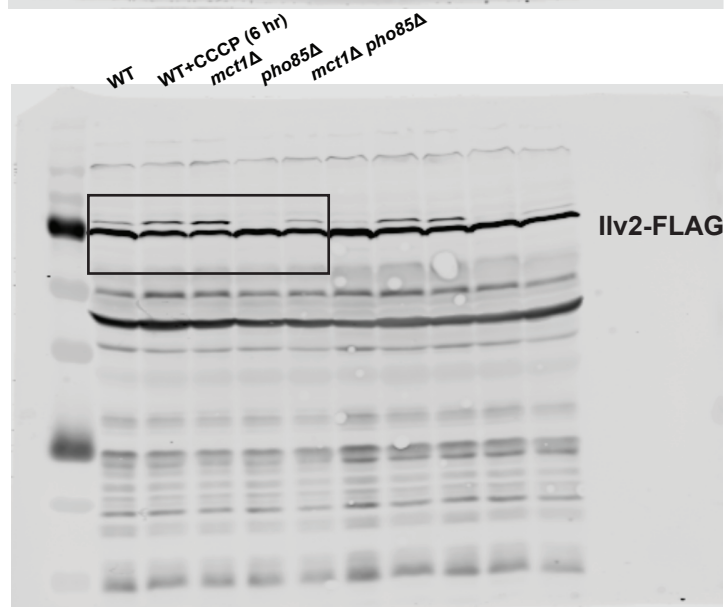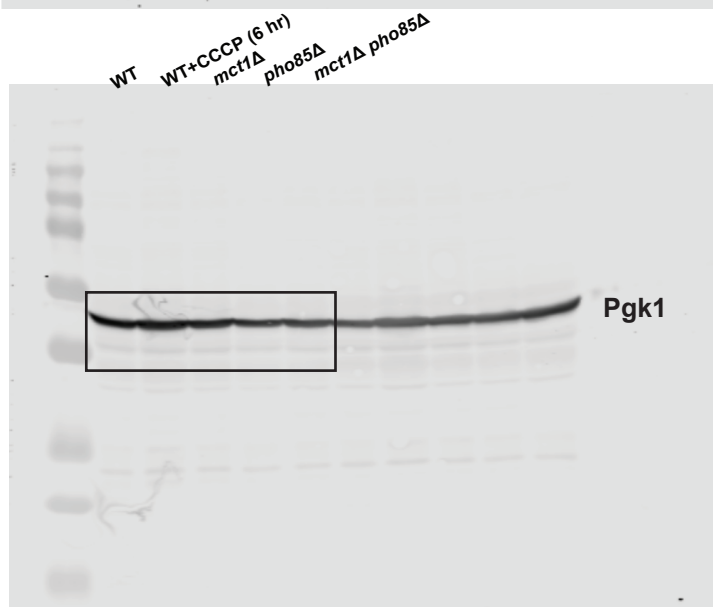

Supplement: fig5-data1 [file elife-84282-fig5-data1-v2.zip]

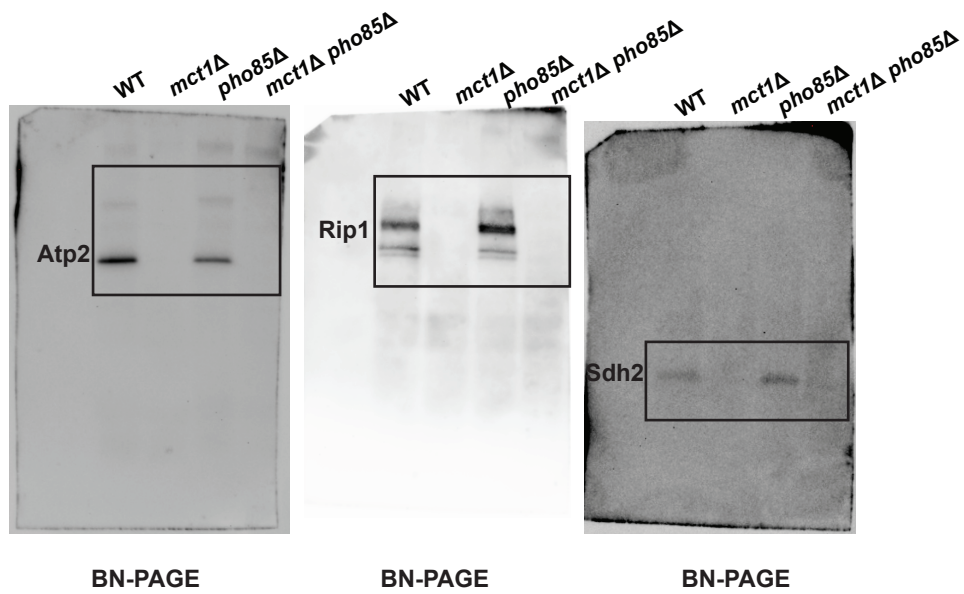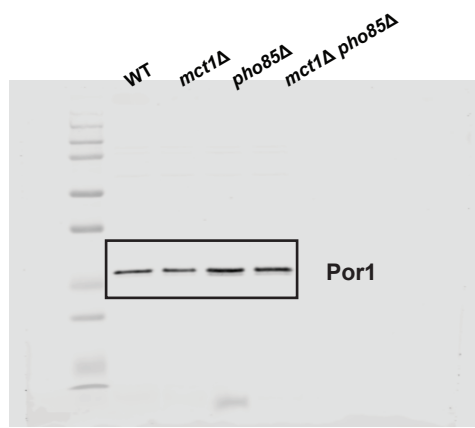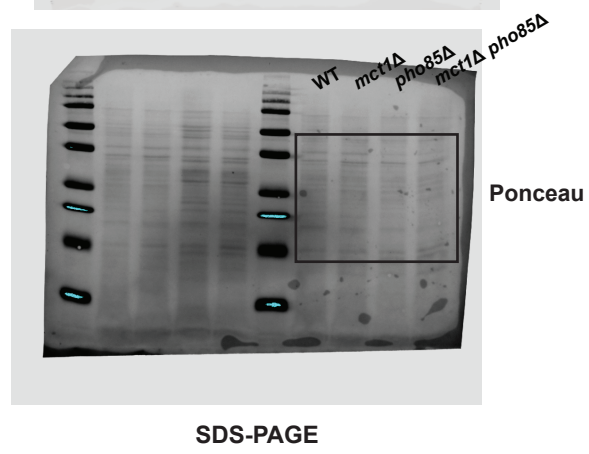

Supplement: fig5-data2 [file elife-84282-fig5-data2-v2.zip]

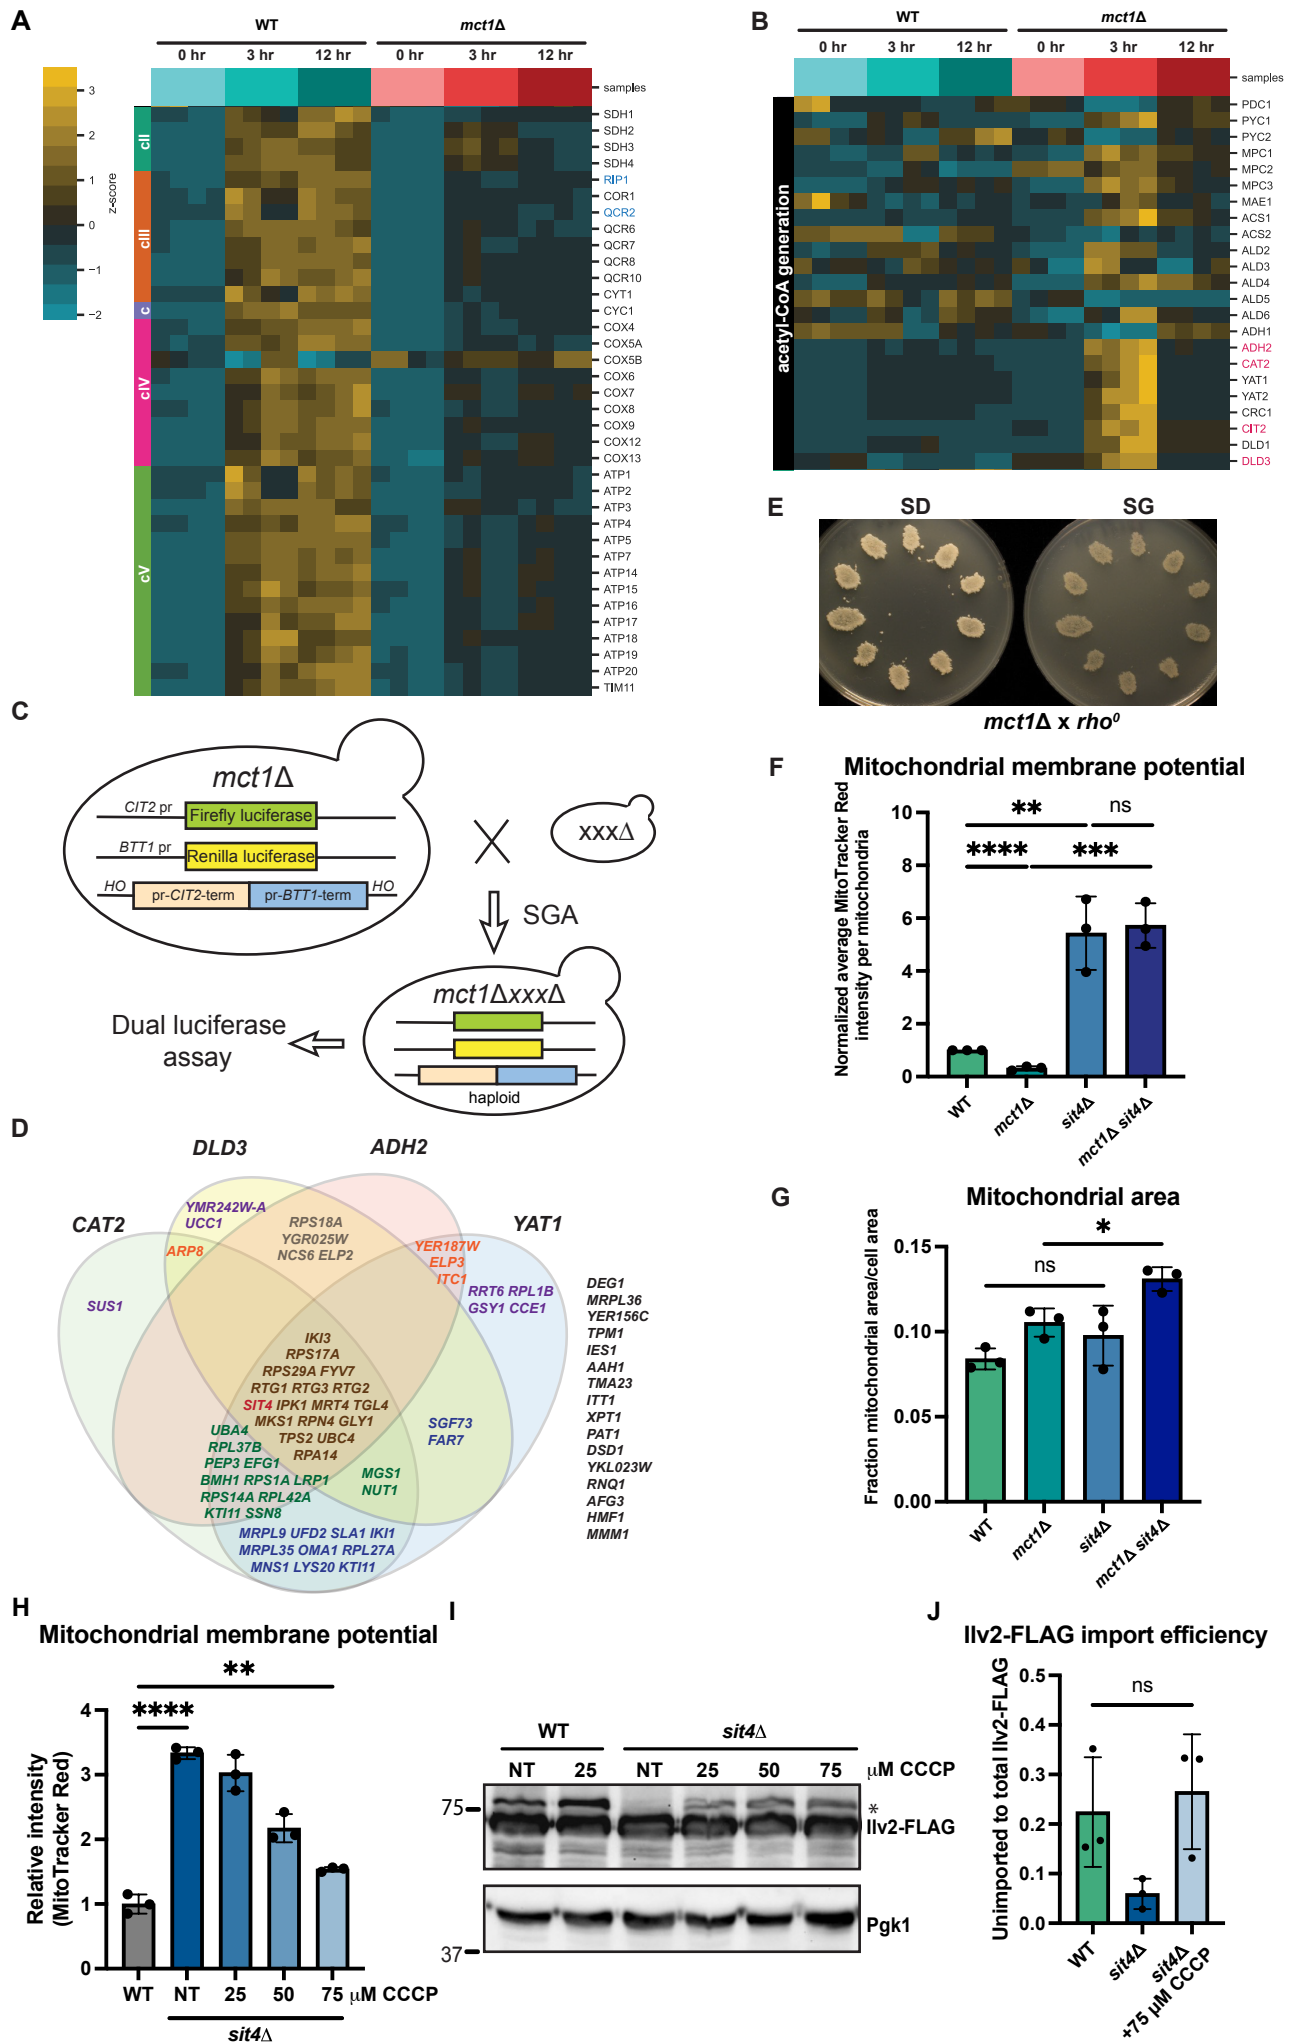

Supplement: supp [file elife_poa_e84282_Figure_1_figure_supplement_1.pdf › elife_poa_e84282_Figure_1_figure_supplement_1.pdf]

A

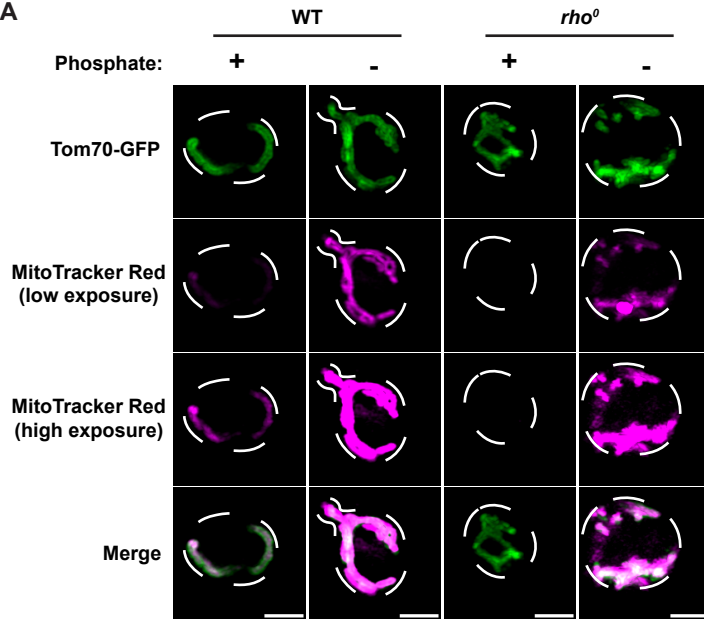

B

## Mitochondrial membrane potential

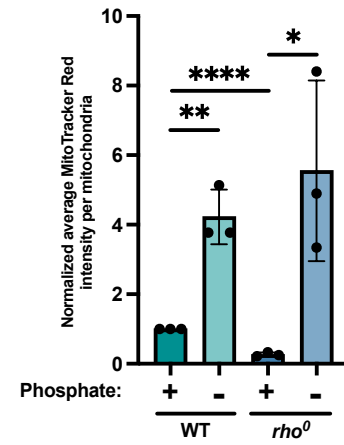

C

## Mitochondrial area

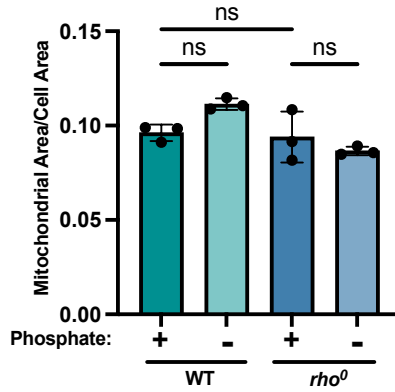

D

## Mitochondrial morphology

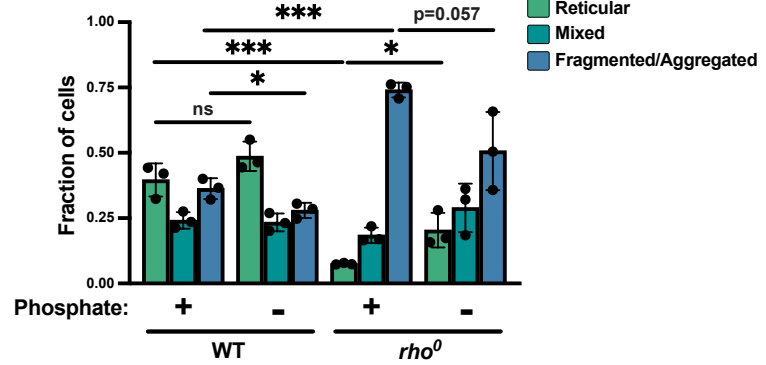

Supplement: supp [file elife_poa_e84282_Figure_3_figure_supplement_1.pdf › elife_poa_e84282_Figure_3_figure_supplement_1.pdf]

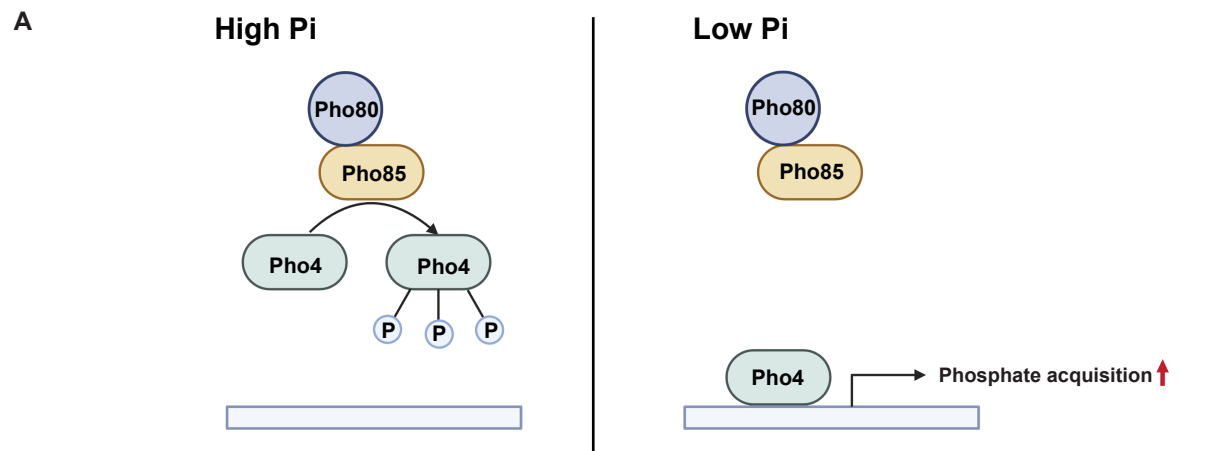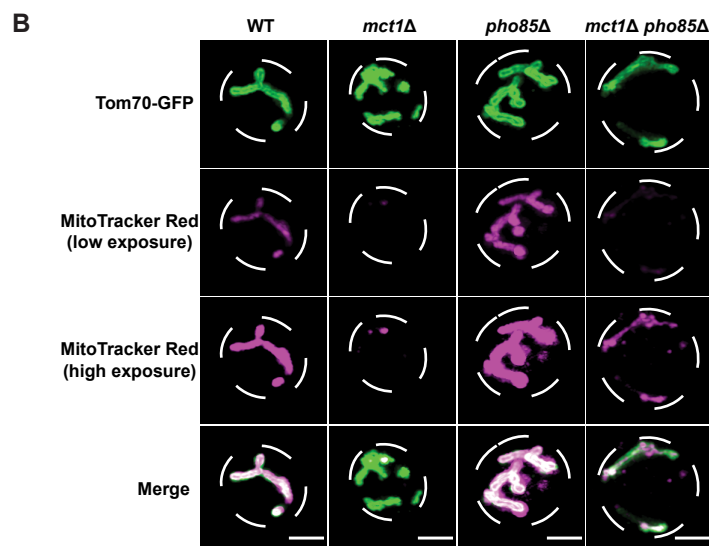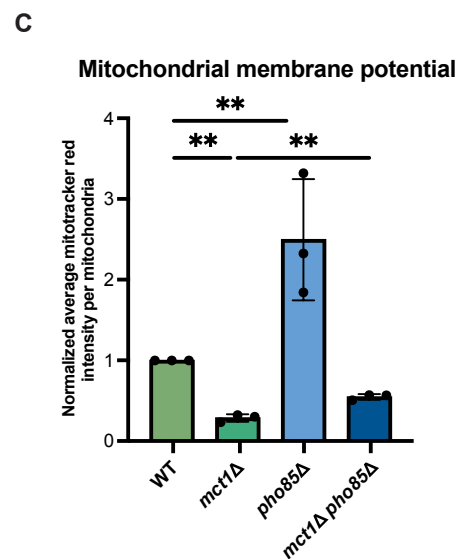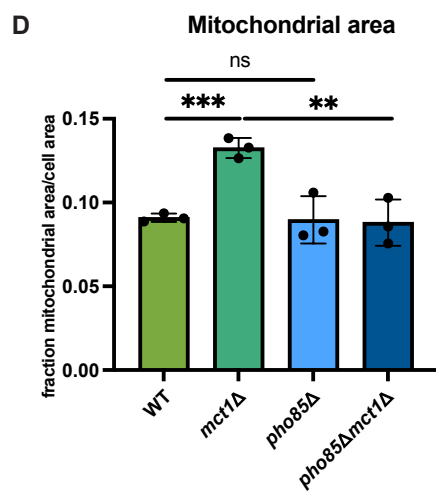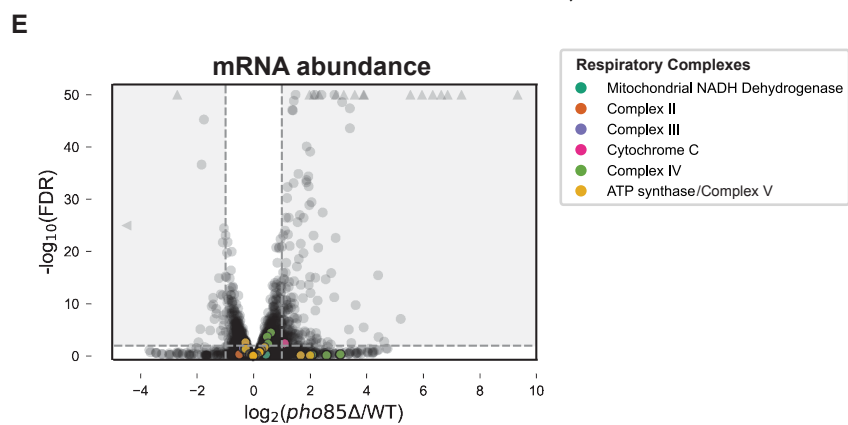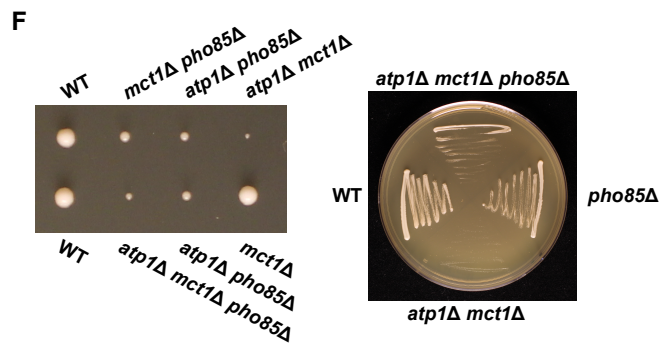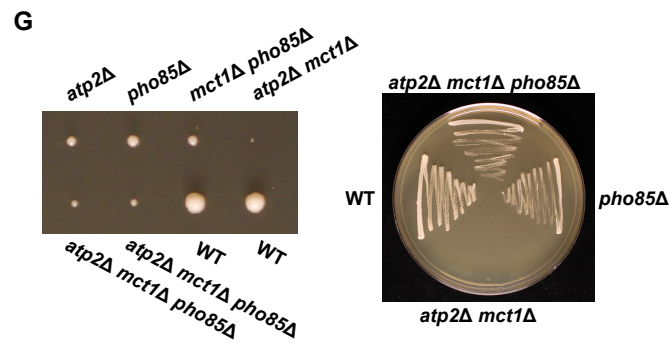

Supplement: supp [file elife_poa_e84282_Figure_5_figure_supplement_1.pdf › elife_poa_e84282_Figure_5_figure_supplement_1.pdf]

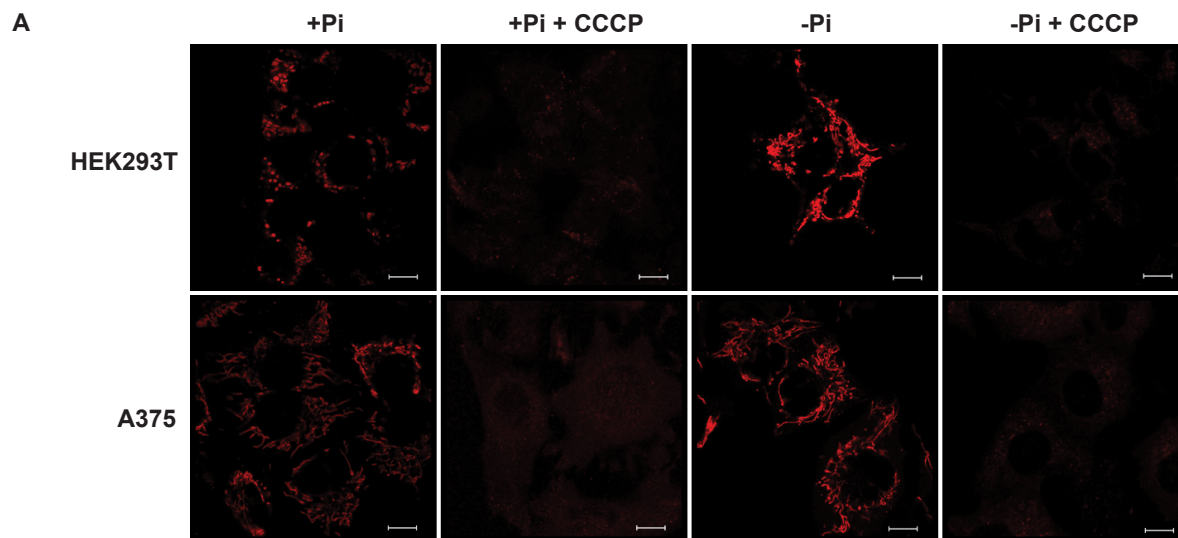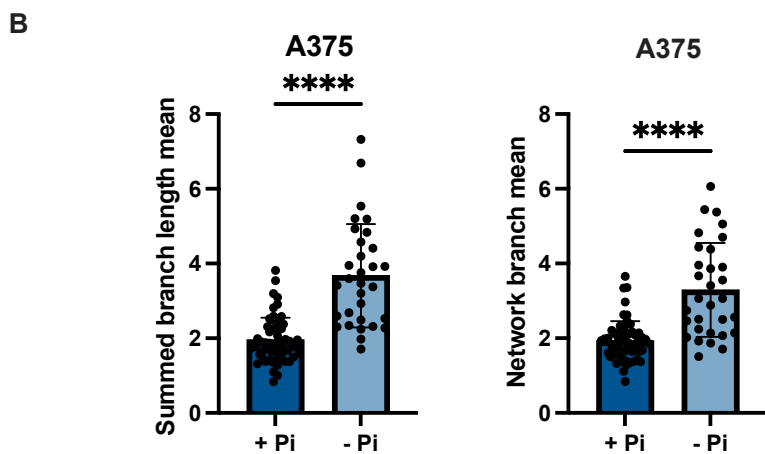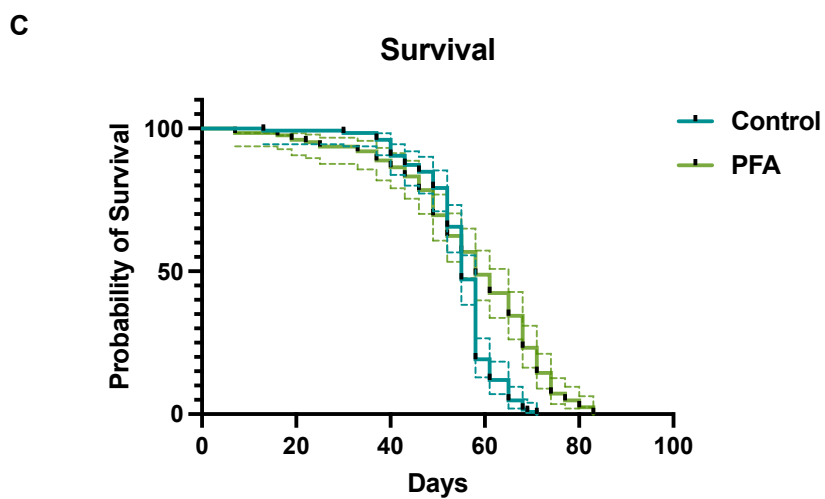

Supplement: supp [file elife_poa_e84282_Figure_6_figure_supplement_1.pdf › elife_poa_e84282_Figure_6_figure_supplement_1.pdf]
